# Supplementary material for: Constrained release of lamina-associated enhancers and genes from the nuclear envelope during T-cell activation facilitates their association in chromosome compartments
Source: HighWire-hosted journal article supplement (doi:10.1101/gr.212308.116), 2017-04-19
Supplement: Supplemental_Figures_and_Legends.docx [file Supplemental_Figures_and_Legends.docx]

# Supplemental Figure Legends

***Constrained release of lamina-associated enhancers and genes from the nuclear envelope during T-cell activation facilitates their association in chromosome compartments***

# Michael I. Robson, Jose I. de las Heras, Rafal Czapiewski, Aishwarya Sivakumar, Alastair R. W. Kerr and Eric C. Schirmer


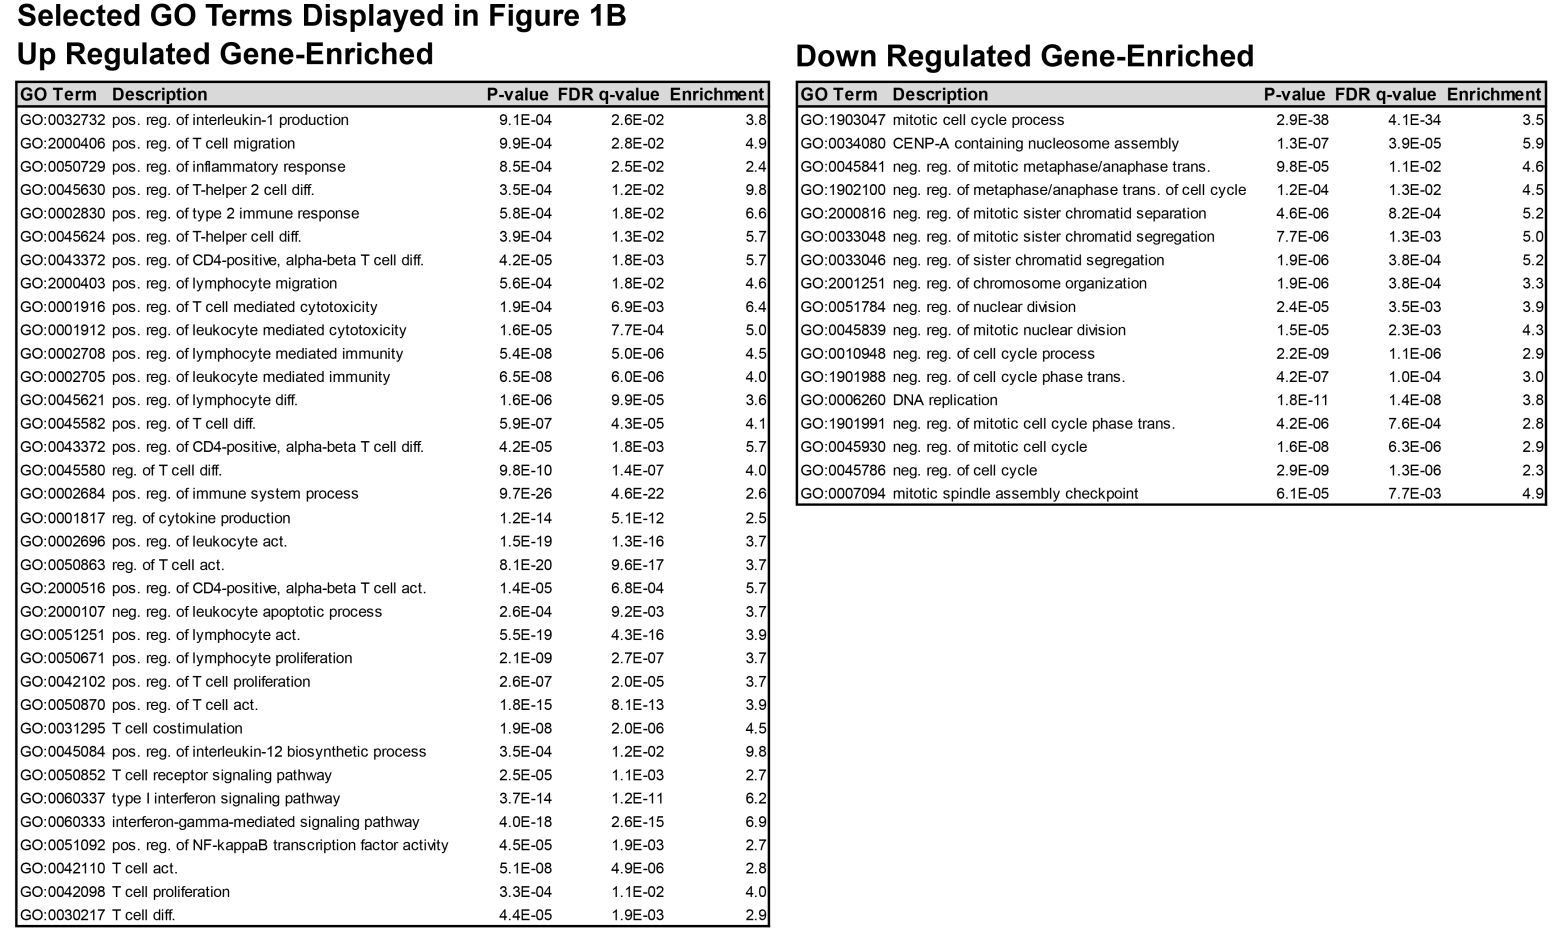


**Figure S1.** Summary of enriched GO terms categories used for Figure 1. See also Fig. 1.

**
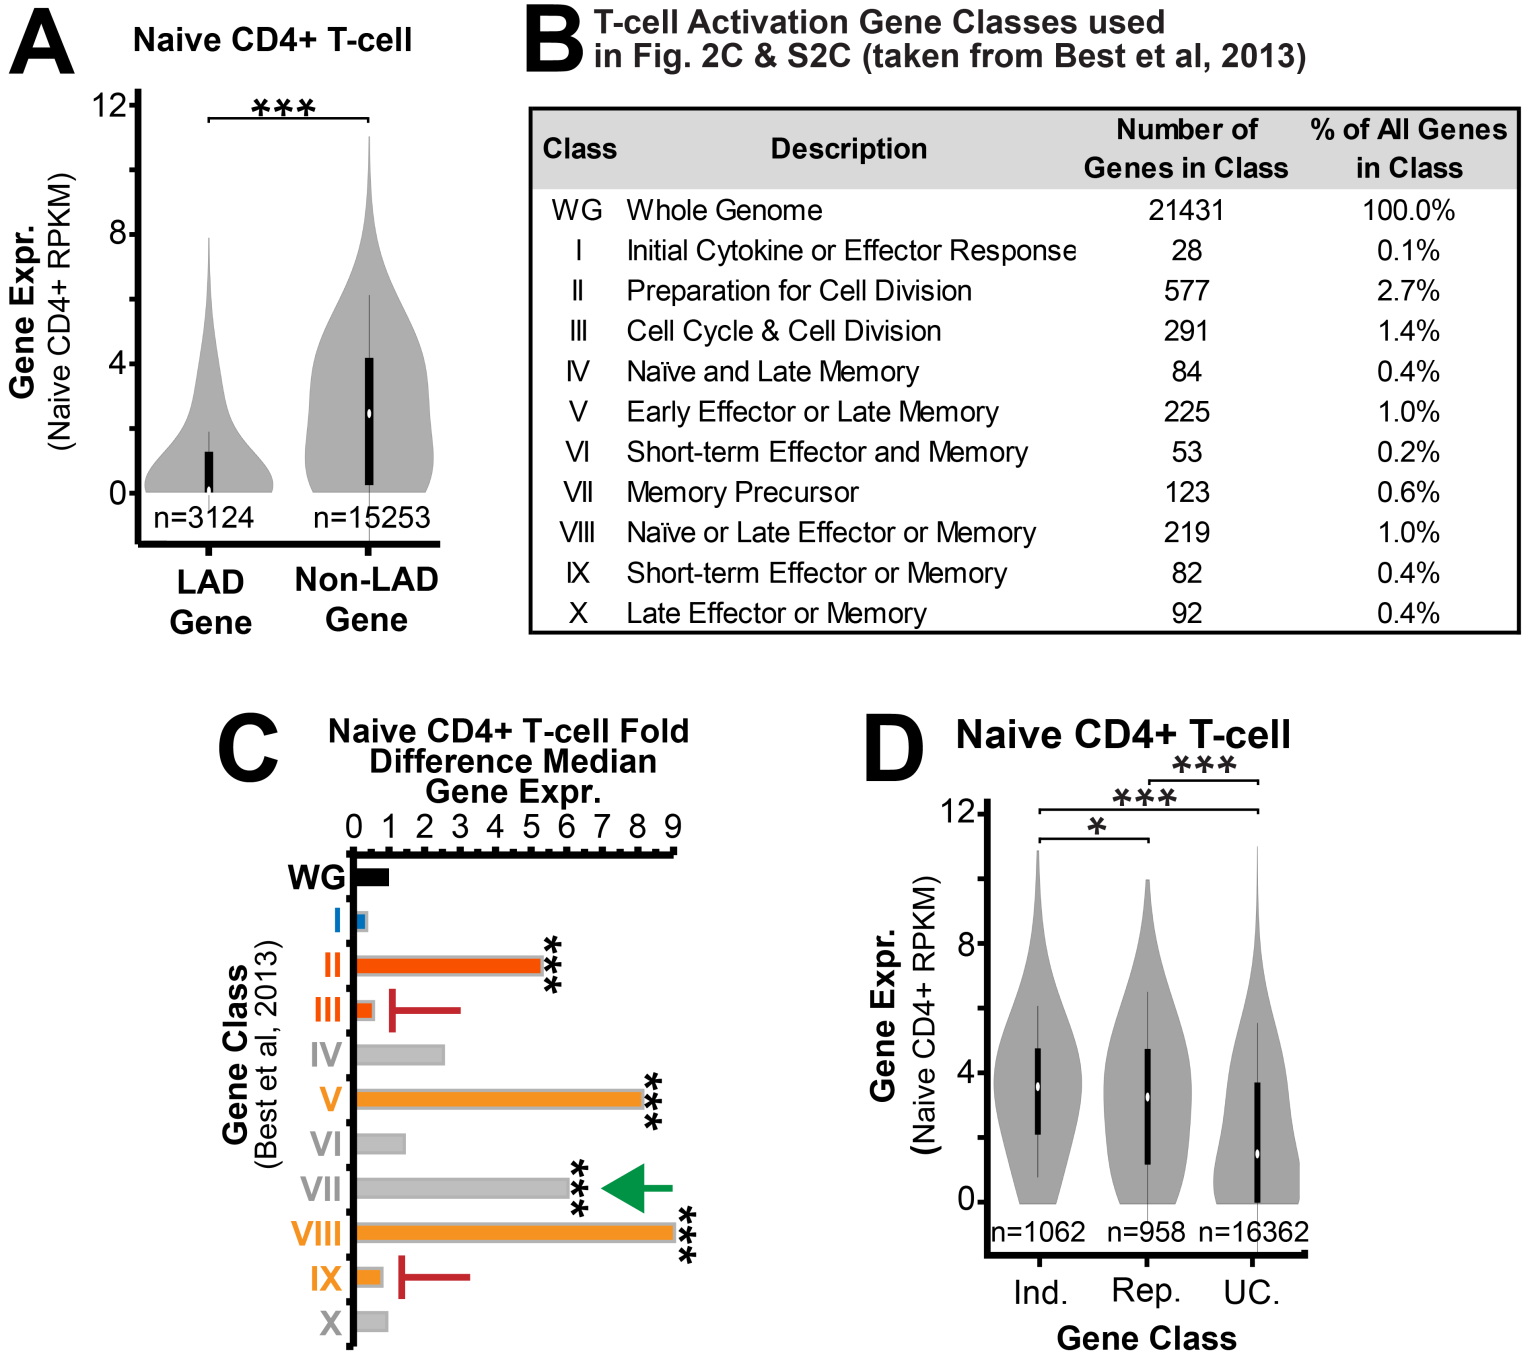
**

**Figure S2.** Lamina association is related to gene expression and function in naïve CD4+ T-cells. (*A*) Violin plot showing the expression of genes in naïve CD4+ T-cells that were in LAD or non-LAD regions in the resting Jurkat T-cells. Expression is in reads per Kb of transcript per Million mapped reads (RPKM) based on published RNA-Seq data from naïve CD4+ T-cells (Ni et al. 2016). Genes in LADs in resting Jurkat cells are also less expressed than non-LAD genes in naïve CD4+ T-cells. (*B*) List of extracted T-cell activation gene classes identified by Best et al, 2013 through their transcriptional dynamics during an extensive mouse T-cell activation time course. (*C*) Fold differences in gene expression in naïve CD4+ T-cells relative to the whole genome (WG) for the 10 categories of genes published by Best et al. Like resting Jurkat T-cells, classes II, V, and VIII are transcriptionally active in naïve CD4+ T-cells, and thus likely depleted from LADs also in the primary cells. By contrast, classes III and IX do not display elevated expression (red line) while class VII does (green arrow). (*D*) Violin plot of the naïve CD4+ T-cells expression levels of genes that were induced (Ind.) or repressed (Rep.) during Jurkat T-cell activation. The distributions are similar to those for the Jurkat data shown in Fig. 2. For A, C and D, significance of difference in gene expression was determined by Dunn test for multiple comparison testing after a Kruskal Wallis significant test. **P* < 0.05, ***P* < 0.01 and *** *P* < 0.001. See also Fig. 2.

**
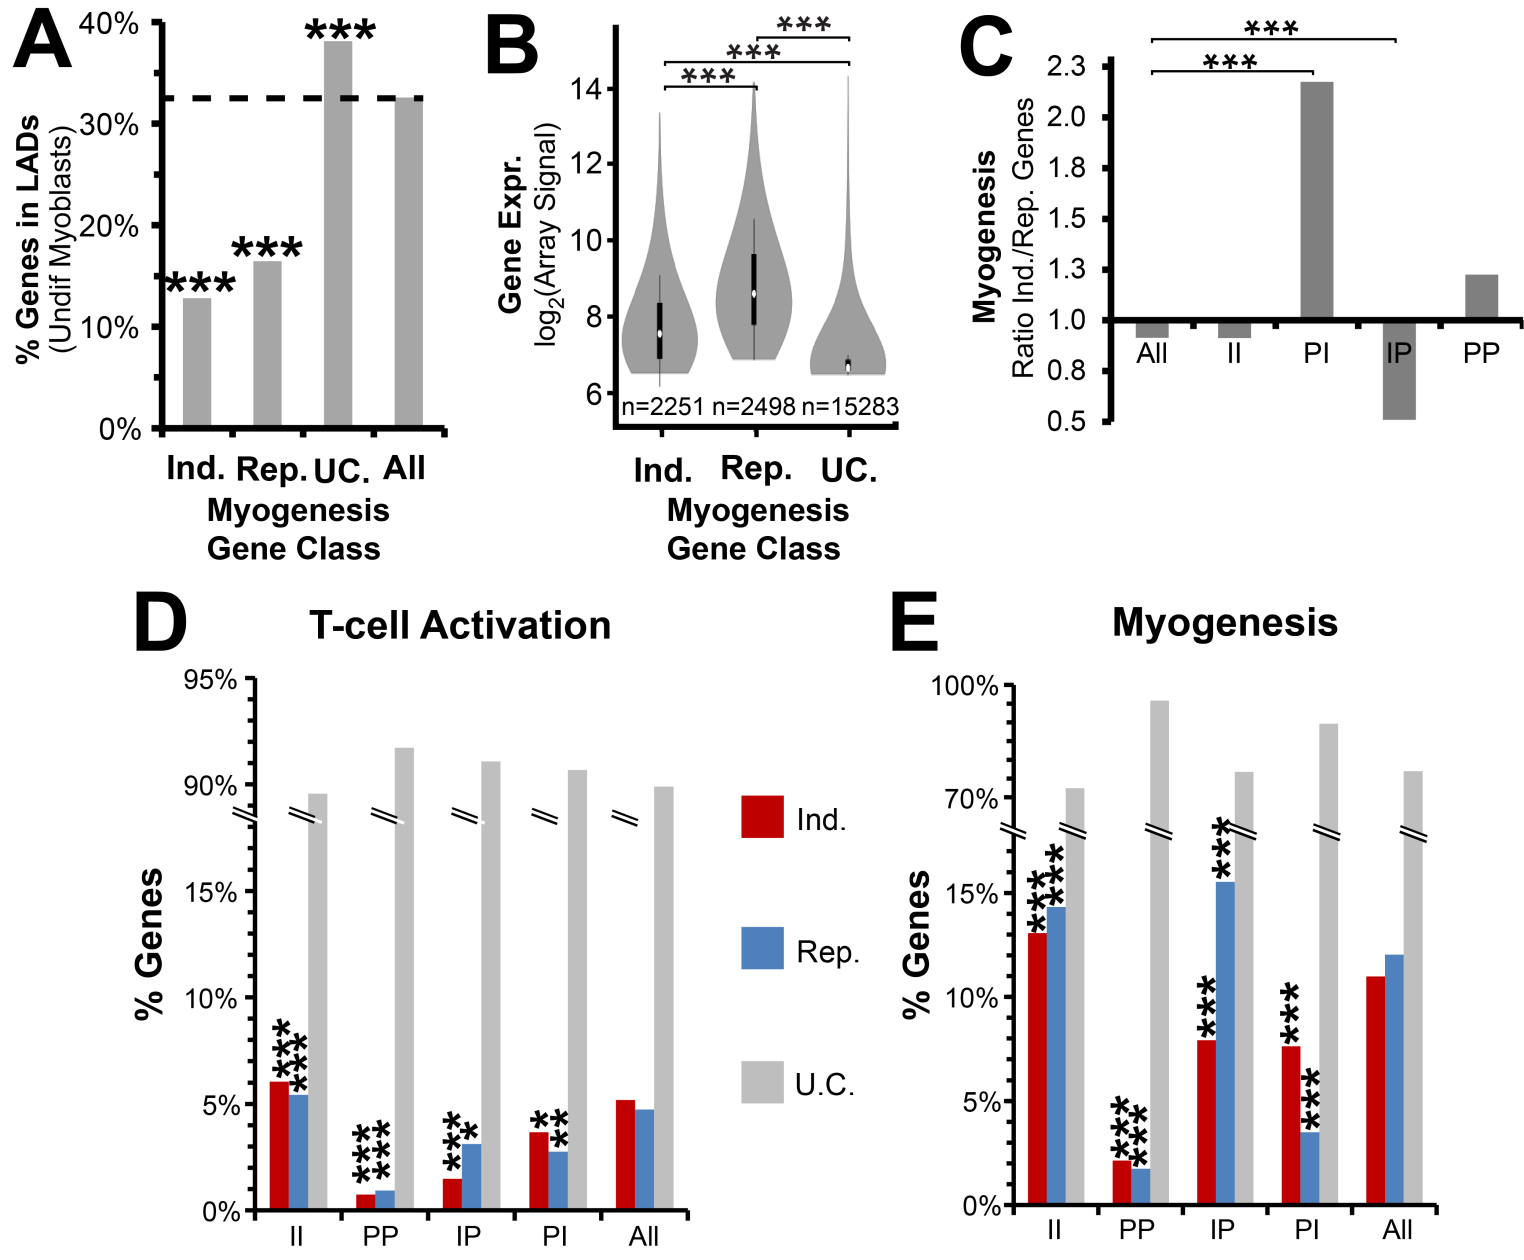
**

**Figure S3.** Comparison of T-cell activation- and myogenesis-induced gene expression and repositioning changes. (*A*) Bar plot showing the percentage of genes occurring in LADs in myoblasts for different expression categories: genes induced (Ind.) or repressed (Rep.) at least 1.4 fold during C2C12 myogenesis, unchanged genes (UC.) and all genes in the undifferentiated myoblasts. (*B*) Violin plot of the C2C12 myoblast expression level of genes induced, repressed, or unchanged during C2C12 myogenesis. (*C*)Bar plot demonstrating ratio of genes induced (Ind.) and repressed (Rep.) during C2C12 myogenesis for the whole genome (All), PI, IP, II and PP regions. (*D, E*). Bar graphs displaying gene expression change behaviour (Ind, Rep and UC) of IP, PI, II, PP and all genes during T-cell activation (*D*) and myogenesis (*E*). For both T-cell activation and myogenesis more PI genes are activated and repressed while more IP genes are repressed than activated. However, fewer repositioning genes display gene expression changes during T-cell activation than in myogenesis. All myogenesis DamID and gene expression data was re-analyzed from Robson et al, 2016. For A, C, D and E statistical significance was determined byFisher tests. For B, significance of differences in gene expression was determined by Dunn test for multiple comparison testing after a Kruskal Wallis significant test. **P* < 0.05, ***P* < 0.01 and *** *P* < 0.001. See also Fig. 2.

**
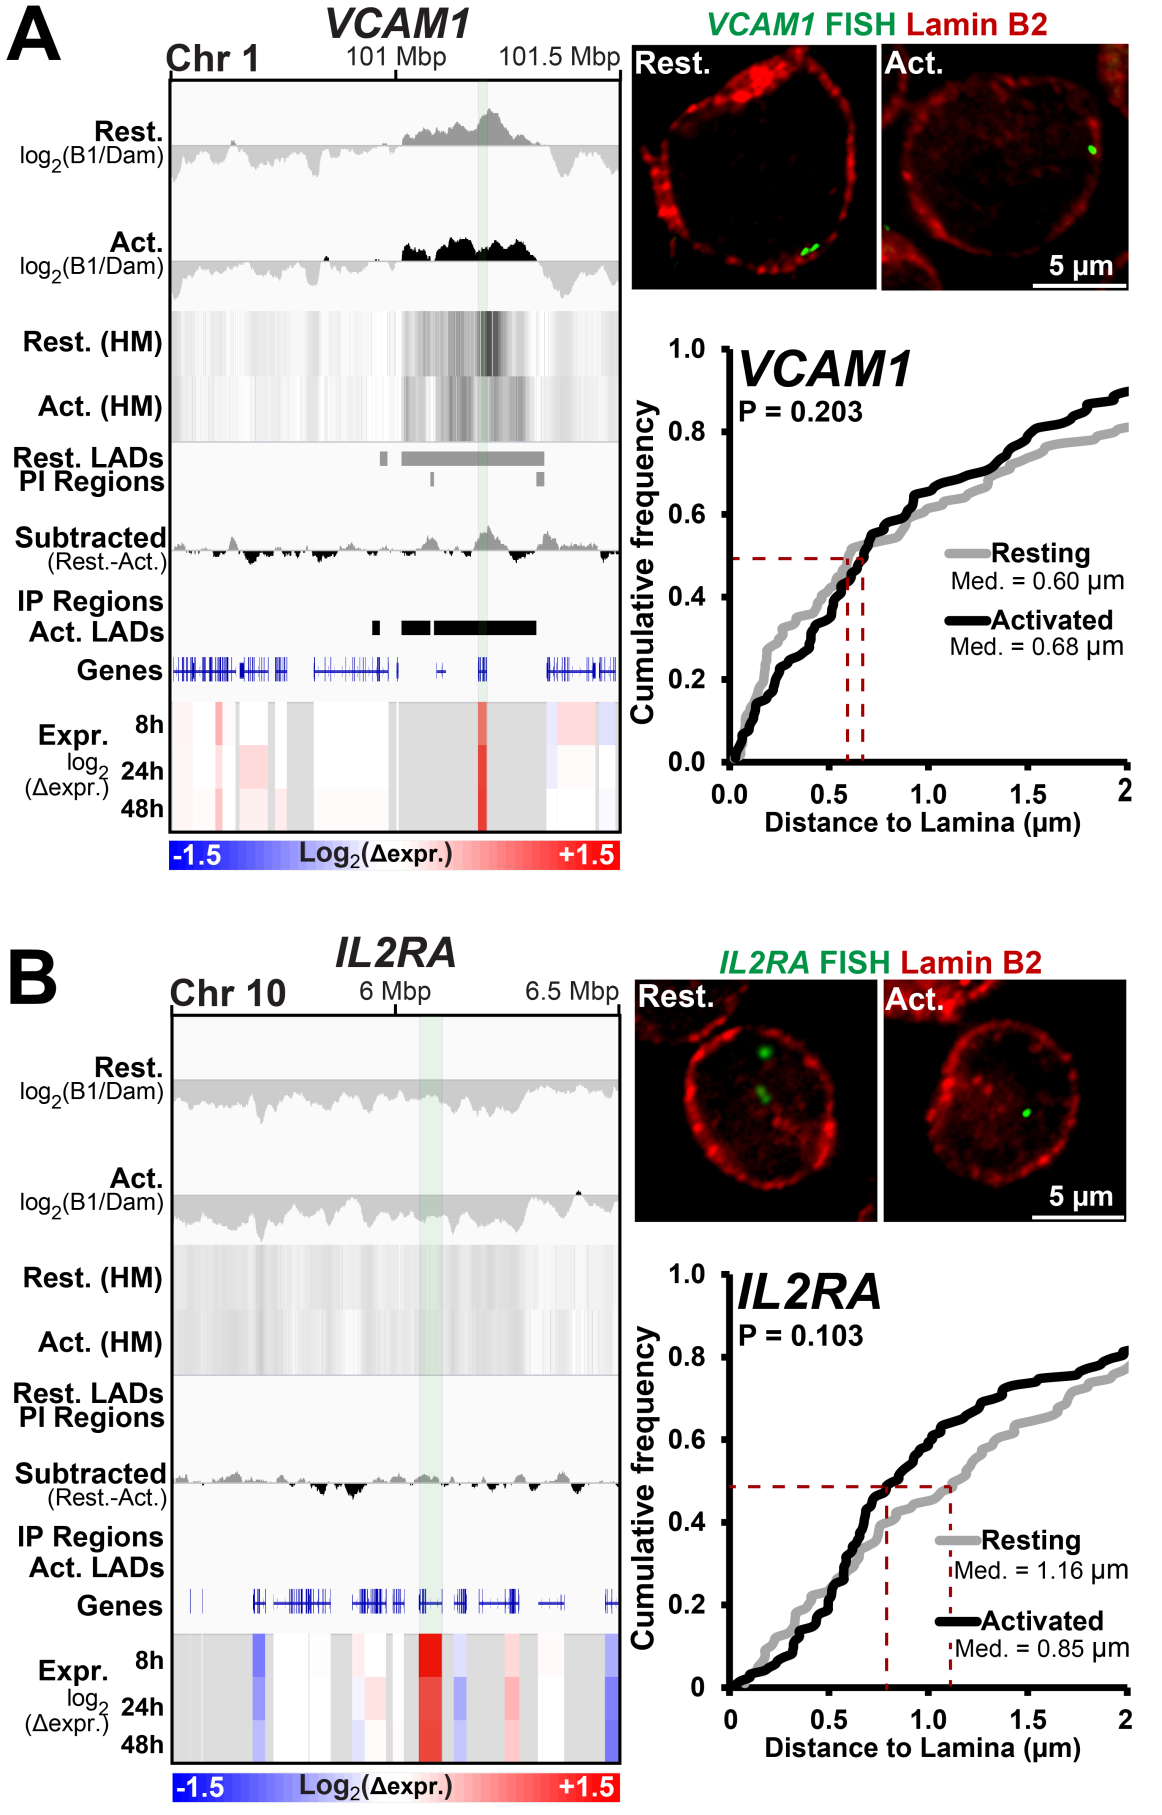
**

**Figure S4.** Genes maintaining positioning in LADs or non-LADs in both resting and activated Jurkat T-cells. (*A and B*) Genome browser views for the genomic region surrounding *VCAM1* and *IL2RA*, respectively, and quantification of loci positioning relative to lamin B2. DamID signal intensities, identified LADs, IP and PI regions and microarray gene expression changes for Resting and Activated Jurkat T-cells are shown. (*A*) The lamina-associated *VCAM1* locus, which contains no IP and PI regions, displays no significant release from the periphery during T-cell activation. (*B*) The consistently non-LAD *IL2RA* locus is significantly further from the periphery and displays no significantly altered positioning following activation. For quantification statistics, the position of loci in the activated sample was compared to the resting sample by KS tests. No significance was observed for *IL2RA* or *VCAM1* loci. Distance measurements were performed on a minimum of 50 nuclei per sample. See also Figs. 2 and 3.

**
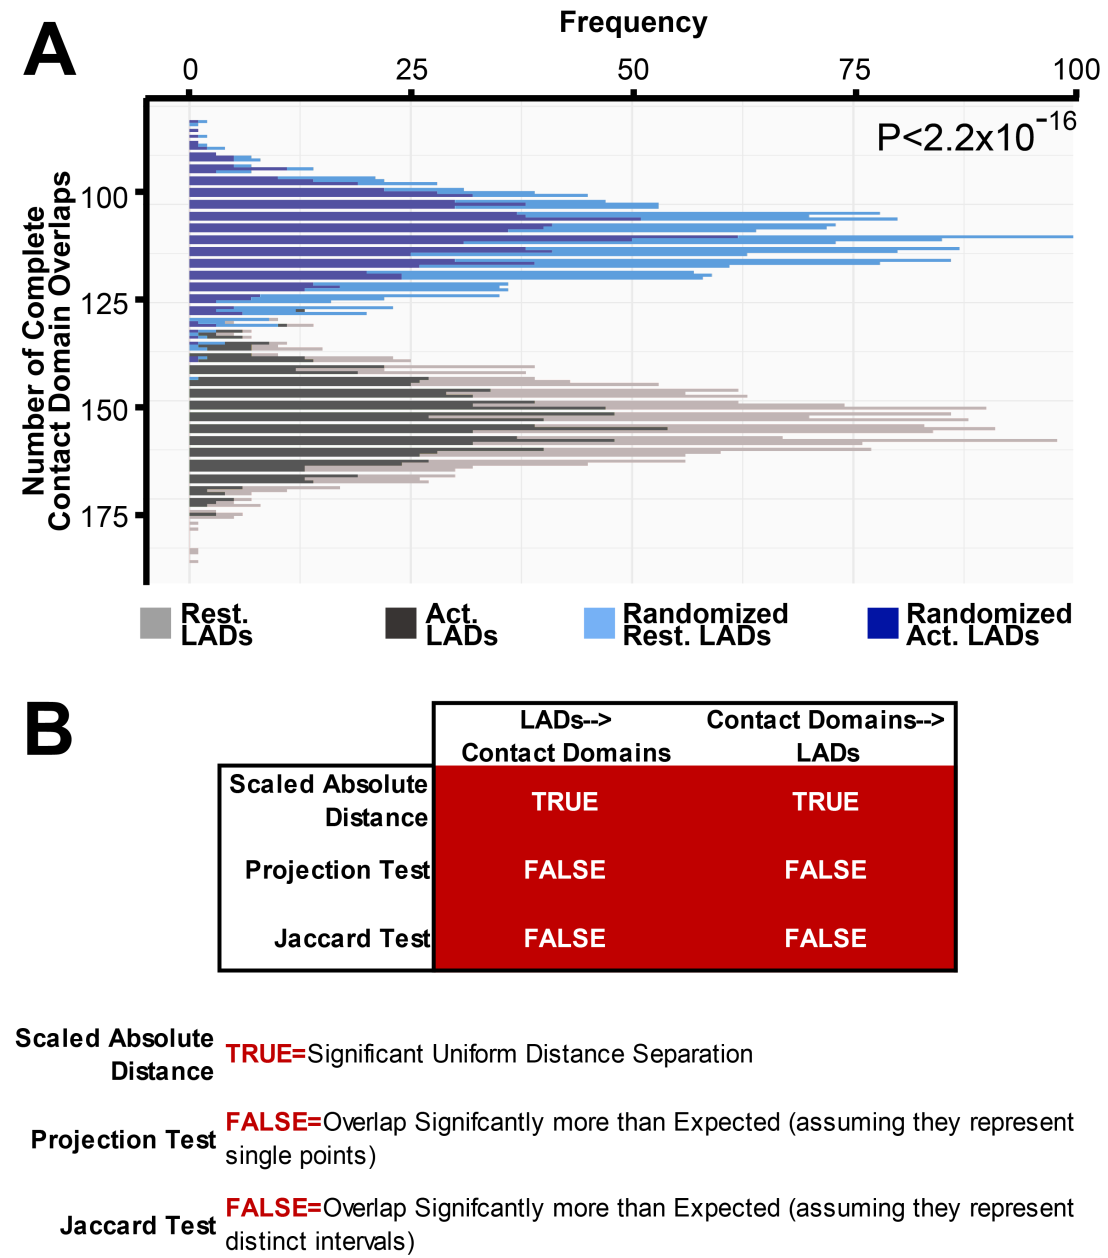
**

**Figure S5.** LADs are frequently encompassed within Contact Domains (CDs). (*A*) Histogram displaying the observed frequency of Jurkat LADs being completely encompassed within GM12878 CDs compared to that expected in a randomly shuffled genome. 500 LADs were randomly selected and the frequency of complete envelopment within a CD determined. The positions of the 500 selected LADs were then randomly shuffled and frequency of complete envelopment re-determined. This process was then repeated 1,000 times, allowing all LADs of the genome to be examined multiple times, and the results plotted. LADs are completely enveloped by CDs significantly more frequently than expected. Statistical significance for both resting and activated LADs was determined by comparing the distribution observed to that found in the randomly LAD-shuffled control by KS test. (*B*) Results of three test outputs from GenometriCorr analysis examining the relationship between GM12878 Contact Domains and resting Jurkat T-cell LADs. Note analysis is two directional with a query each time being contrasted to a reference. Thus for each comparison two results generated; LADs-->Contact Domains and Contact Domains-->LADs. For both directions, results that reject the null hypothesis and support significant correlation or overlap between CDs and LADs are highlighted in red and explained in the legend within the figure. See also Fig. 5.

**
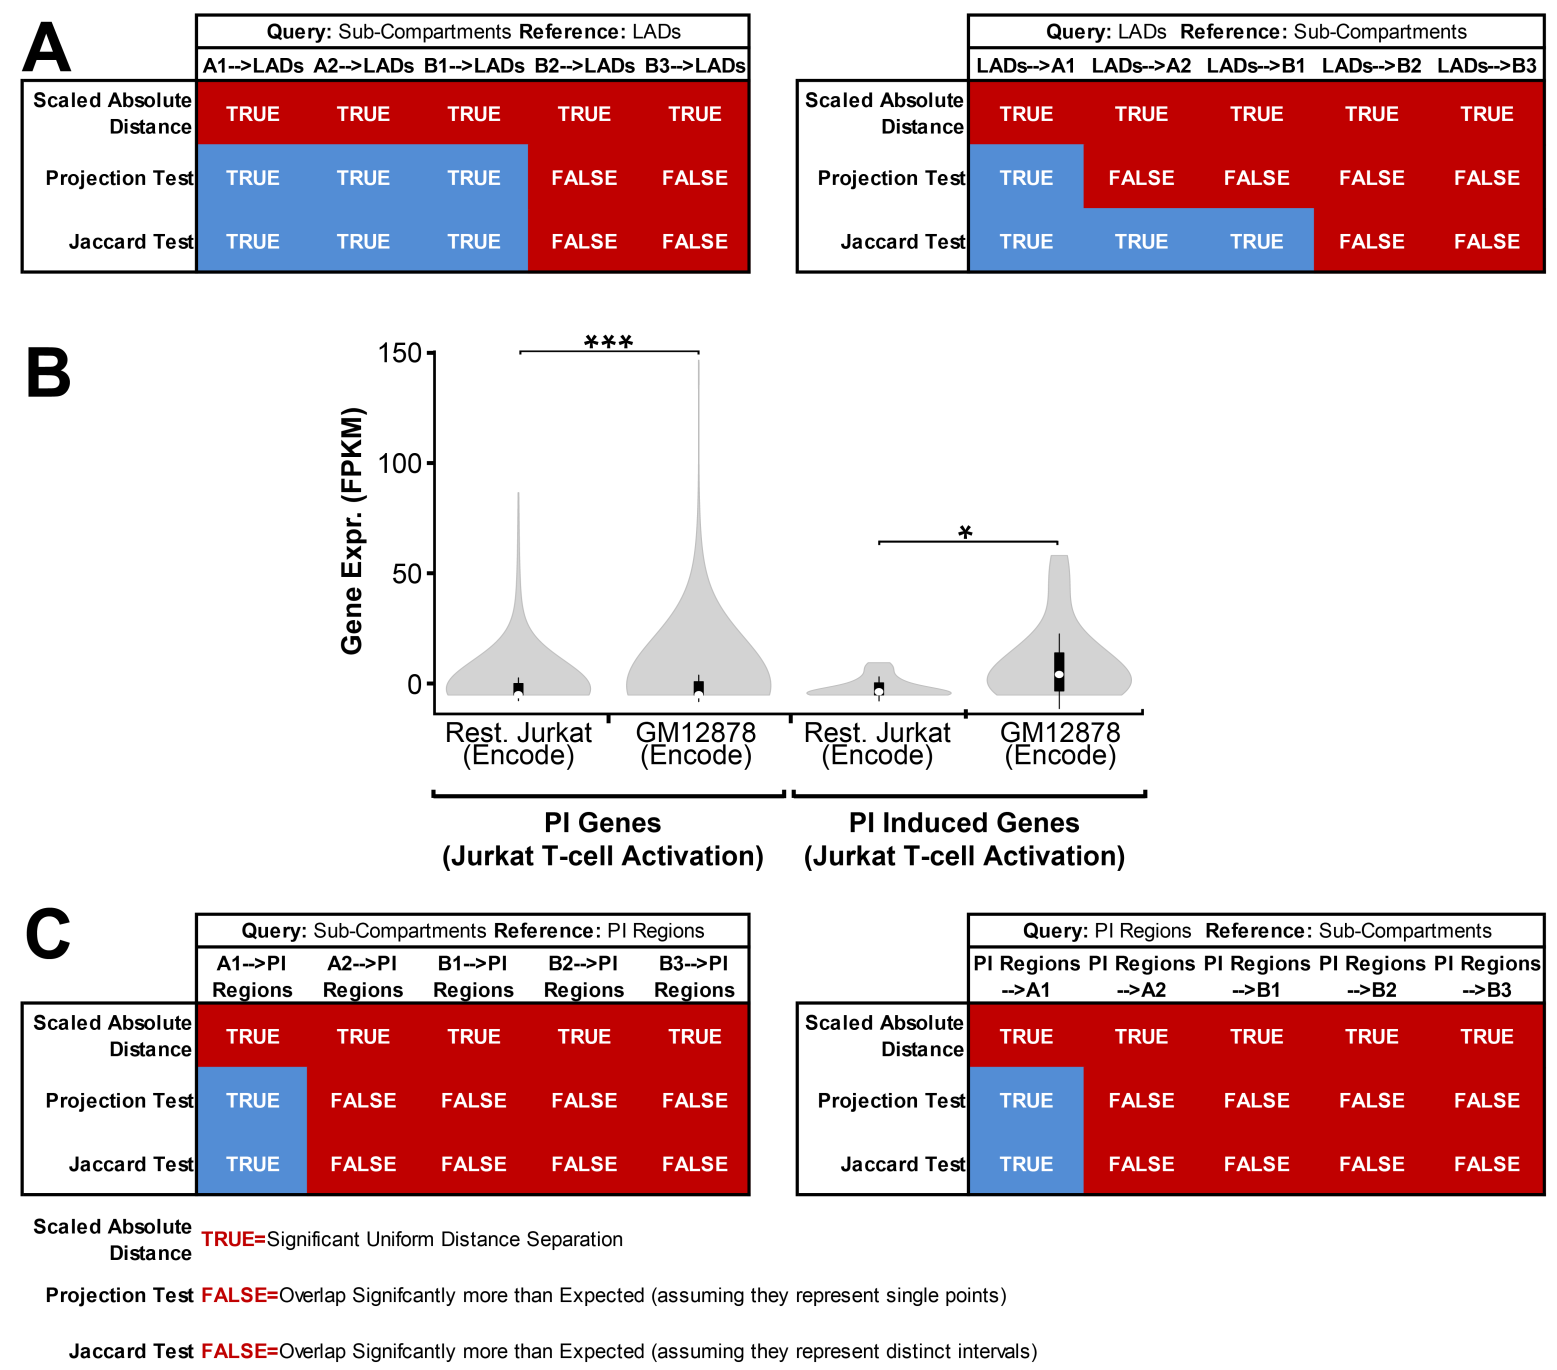
**

**Figure S6.** Genes induced and released from LADs during Jurkat T-cell activation also display elevated expression in GM12878.(*A*) GenometriCorr analysis of resting Jurkat LADs with GM12878 sub-compartments. LADs and all sub-compartments displayed distinct uniform distance separations (Scale Absolute Distance), regardless of the directionality of the test. Similarly by the Jaccard test, B2 and B3 Sub-compartments and LADs also display greater overlap than expected by chance, regardless of direction (B2 and B3-->LADs and LADs-->B2 and B3; Jaccard Tests). However, in the Projection tests, LADs also additionally displayed greater than expected overlap with the A2 and B1 sub-compartments (LADs-->A2 and B1) but not vice versa (A2 and B1-->LADs). Hence the relationship between sub-compartments and LADs may be asymmetrical.(*B*) Violin plots showing the comparison of RNA-seq expression in ENCODE resting Jurkat and GM12878 cells for genes induced and released from the periphery in PI regions during Jurkat T-cell activation. Genes in PI genes, as well as PI genes induced during T-cell activation, both display elevated expression in GM12878 cells. For quantification, the expression of genes in ENCODE Resting Jurkat was compared to that in ENCODE GM12878 cells by KS tests. **P* < 0.05, ***P* < 0.01 and *** *P* < 0.001. (*C)*. GenometriCorr analysis of PI regions with GM12878 sub-compartments. PI regions displayed greater than expected overlap with the A2, B1, B2 and B3 sub-compartments, regardless of test directionality.

**
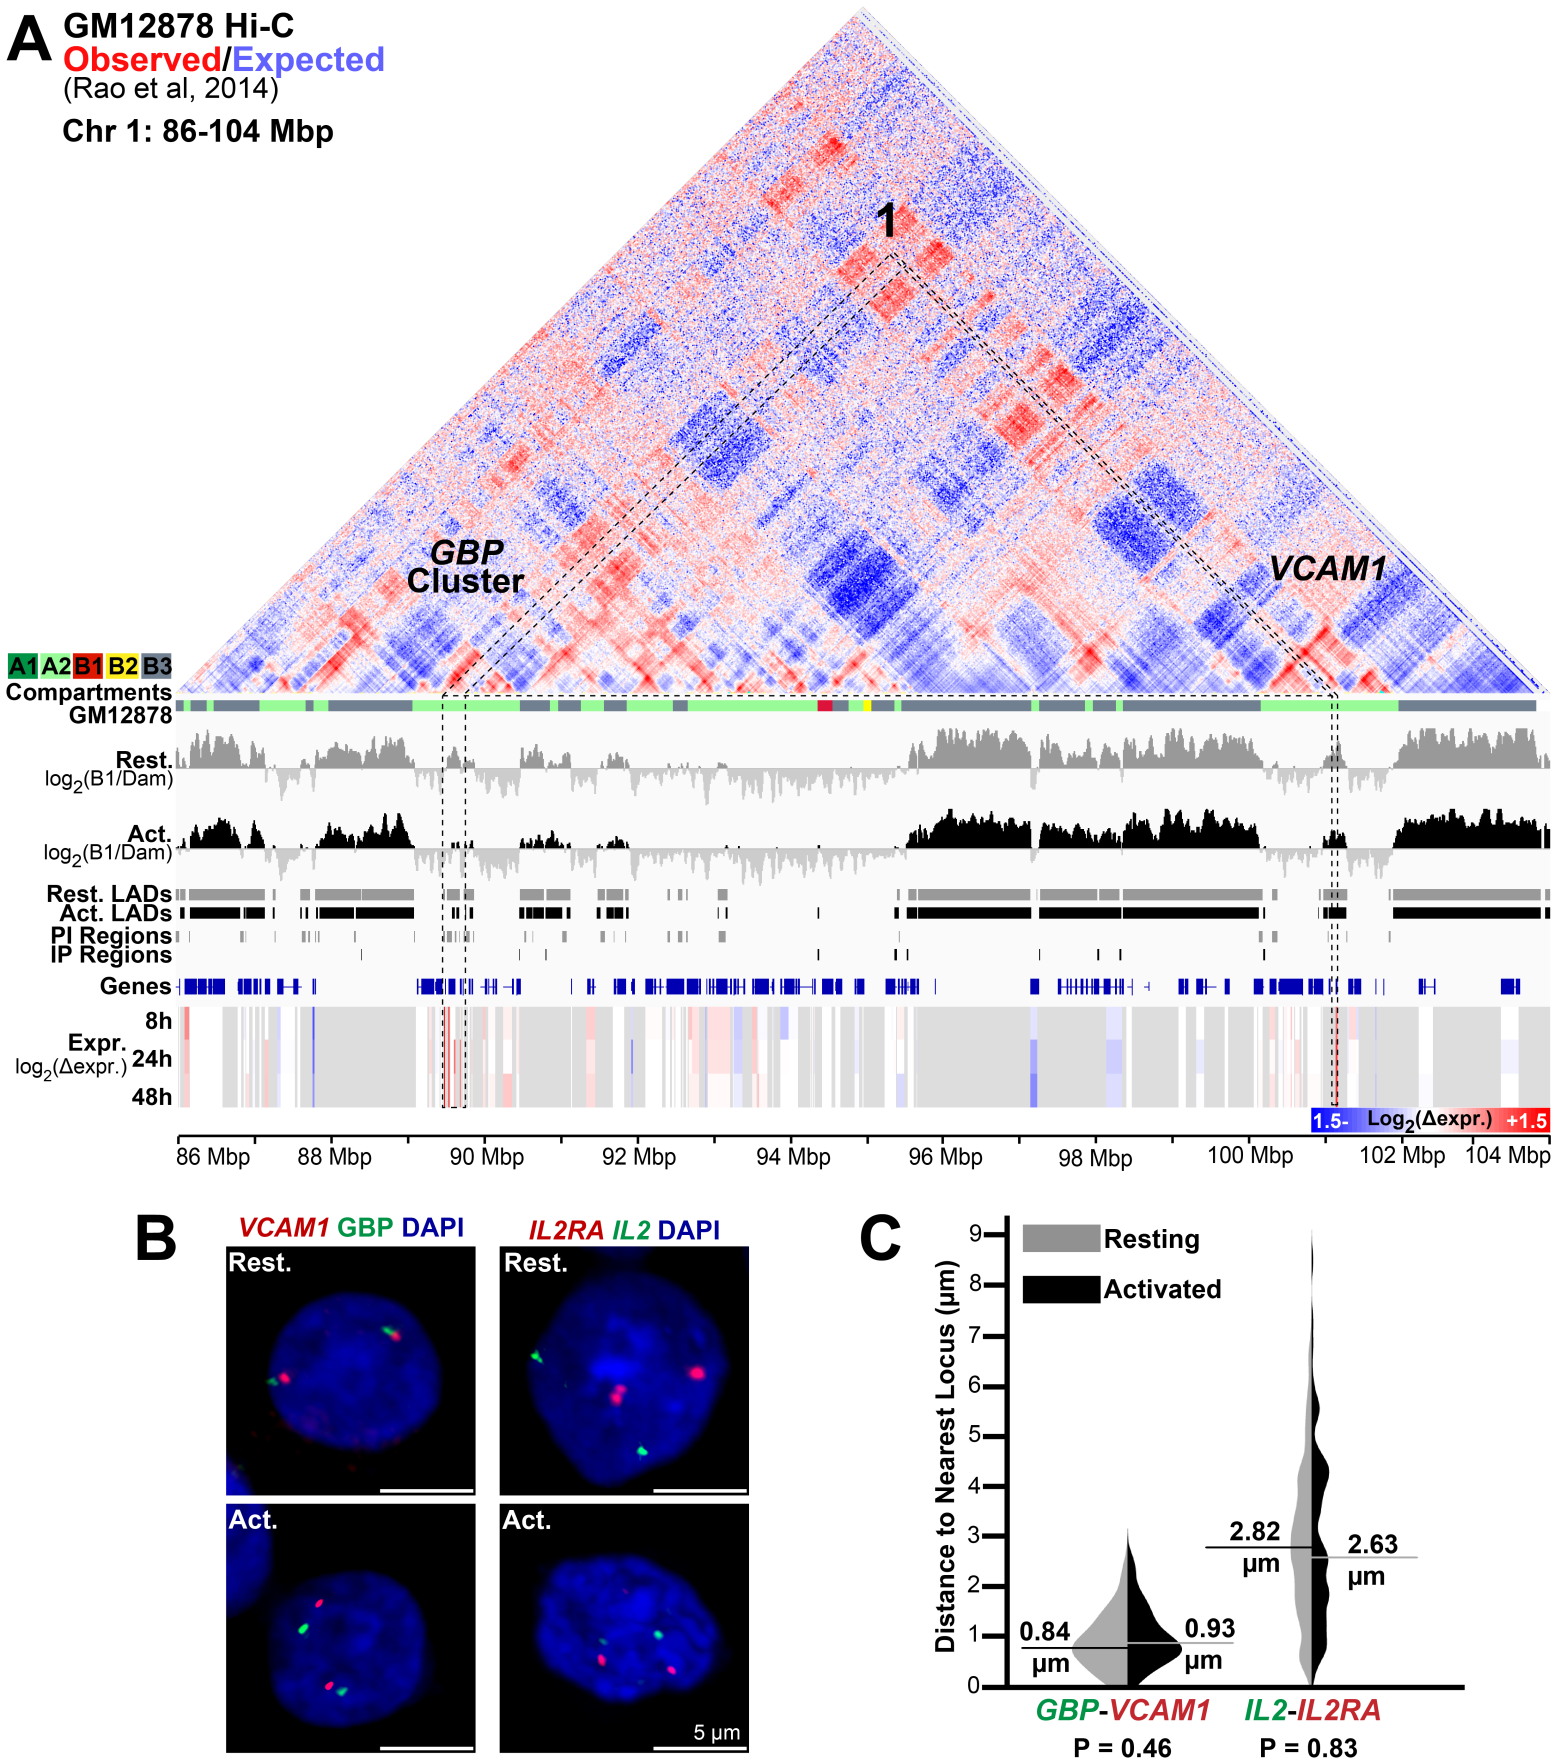
**

**Figure S7.** Loci that do not both release from LADs remain physically separated In activated Jurkat T-cells. (*A*) Genome browser view of a 17 Mb region of chromosome 1 with GM12878 cell observed/expected Hi-C interactions and sub-compartments (Rao et al. 2014) and DamID signal intensities, identified LADs, IP and PI regions and microarray gene expression changes for Resting and Activated Jurkat T-cells displayed as in Figure 7. The GBP gene cluster and *VCAM1* display no observable Hi-C interaction. (*B and C*) Representative images and quantification respectively of inter-loci distances in resting and activated T-cells for the *VCAM1* and the *GBP* gene cluster, located 11 Mb apart, and the *IL2RA* and *IL2* loci, located on separate chromosomes. The distance between *IL2RA* and *IL2,* or the more spatial proximal *VCAM1* and *GBP* gene cluster, remains unchanged during T-cell activation. For quantification statistics, the positions of loci in the activated sample were compared to the resting sample by KS tests. **P* < 0.05, ***P* < 0.01 and *** *P* < 0.001. Distance measurements were performed on a minimum of 50 nuclei per sample. See also Fig. 7.

**
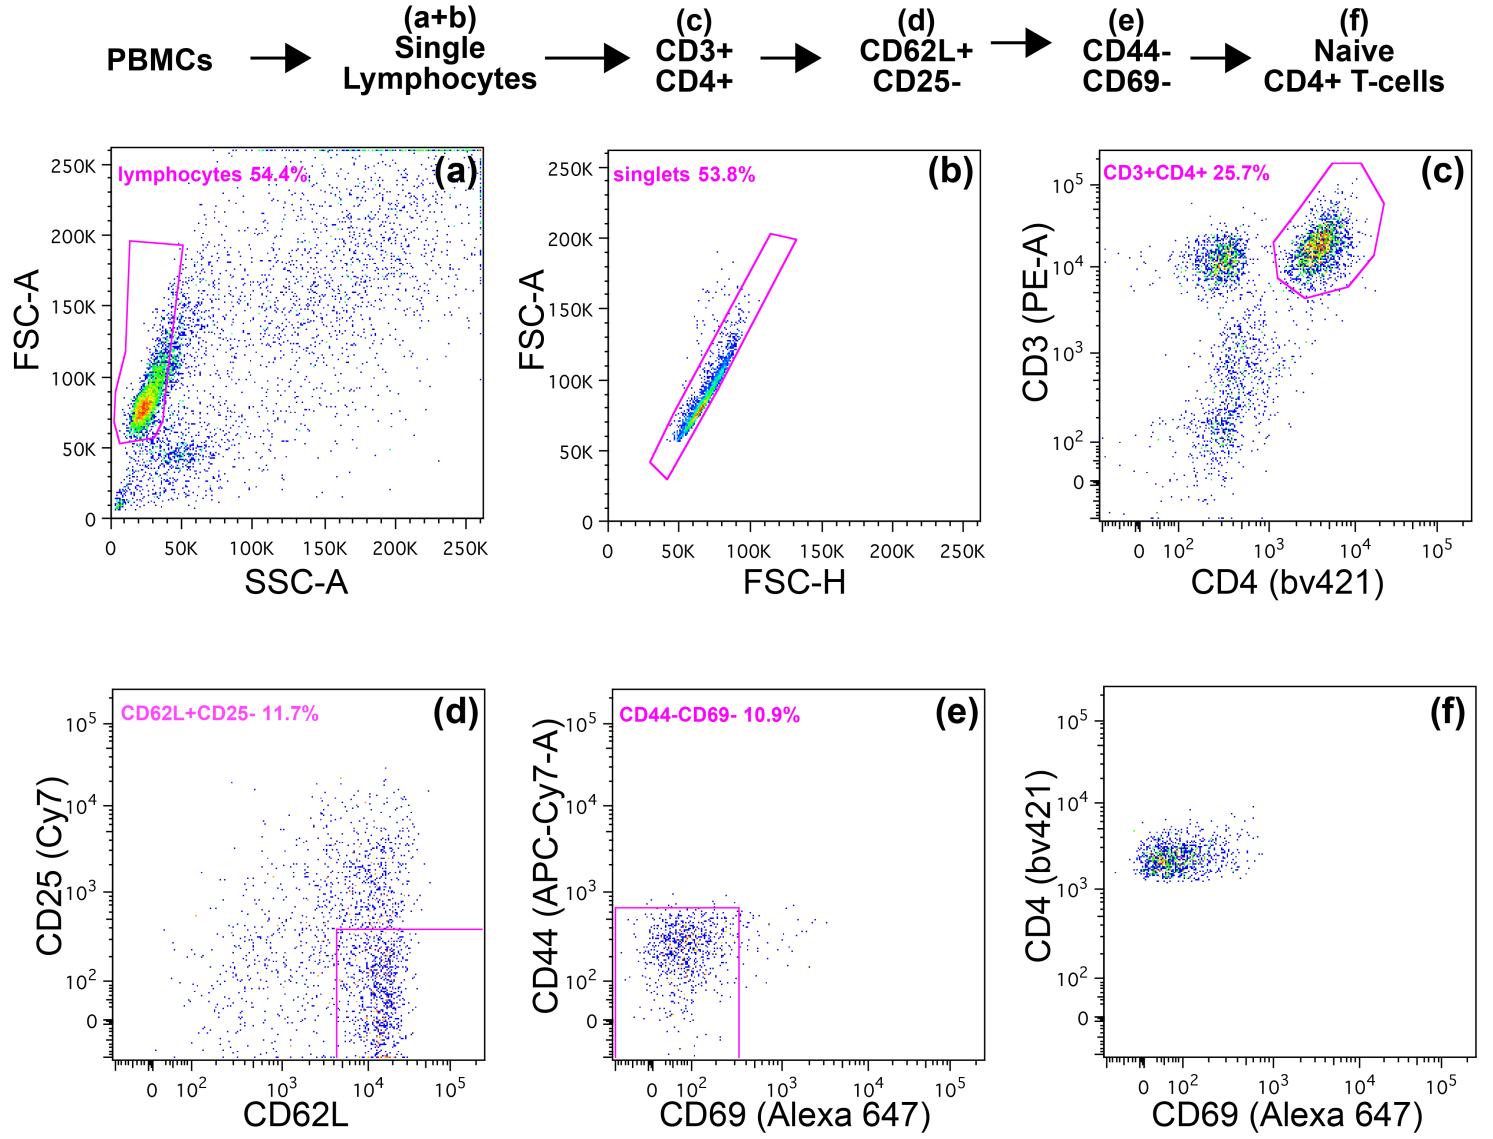
**

**Figure S8.** FACs gating scheme for isolation of naïve CD4+ T-cells. Single lymphocytes were first sorted from PBMCs, necrotic cells and debris using forward light scatter area (FSC-A), forward light scatter height (FSC-H) and side light scatter area (SSC-A) gates (*A*) and (*B*). CD4+ T-cells were then selected by CD3 and CD4 staining (*C*). Naïve cells with a lack of activation markers were isolated by sequential gates for CD25 negative and CD62L positive cells (*D*) followed by CD44 negative and CD69 negative cells (*E*). The last panel (*F*) shows the final CD4 positive and CD69 negative population. Hence, a population of pure CD3+, CD4+, CD25-, CD62L+, CD44- and CD69- naïve T-cells were isolated. See also Fig. 8.
