# Supplementary material for: Constrained release of lamina-associated enhancers and genes from the nuclear envelope during T-cell activation facilitates their association in chromosome compartments
Source: HighWire-hosted journal article supplement (doi:10.1101/gr.212308.116), 2017-04-19
Supplement: Supplemental_Information.docx [file Supplemental_Information.docx]

# Supplemental information

***Constrained release of lamina-associated enhancers and genes from the nuclear envelope during T-cell activation facilitates their association in chromosome compartments***

# Michael I. Robson, Jose I. de las Heras, Rafal Czapiewski, Aishwarya Sivakumar, Alastair R. W. Kerr and Eric C. Schirmer

Supplemental Methods

Supplemental References

# Supplemental methods

## *Plasmid and cell sources*

psPAX2 and pMD2.G were a gift from Justina Cholewa-Waclaw (Adrian Bird, WTCCB, Edinburgh). pLgw Dam-V5-Lamin B1 and pLgw V5-Dam were a gift from the van Steensel laboratory. Jurkat T-lymphocyte clone E6-1 was purchased from ATCC while Raji lymphoblastoid cells were a gift from Professor Vicente Andrés (Centro Nacional de Investigaciones Cardiovasculares. Madrid, Spain).

## *Antibodies*

Rabbit anti-Lamin B2 (Schirmer et al. 2001) antibody was used at a 1:400, dilution. For visualization of primary antibodies for immunofluorescence, donkey anti-rabbit pig secondary antibodies conjugated to a variety of Alexa Fluor® dyes were used (Molecular Probes, Invitrogen). For the detection of biotin- or digoxigenin-labelled probes in FISH experiments, streptavidin (Molecular Probes, Invitrogen) or anti-digoxigenin antibodies (Jackson labs) conjugated to Alexa Fluor® dyes were used, respectively.

## *Preparation of Peripheral Blood Mononuclear Cells (more detailed)*

Human peripheral blood mononuclear cells (PBMCs) were isolated from buffy coats supplied by the Scottish National Blood Transfusion Service (SNBTS) with approval of the SNBTS Committee for Governance of Blood & Tissue Samples for Non-Therapeutic Use and local in accordance with national ethics requirements. PBMCs were isolated by density gradient centrifugation using Histopaque-1077 (Sigma). Briefly, blood was diluted 2-fold with PBS and 15 ml was carefully layered over 15 ml Histopaque 1077 in a 50ml tube and centrifuged at 400 x *g* for 30 min at room temperature. The opaque interface containing PBMCs was collected into a fresh tube, diluted in PBS and pelleted. The cells were washed three additional times with PBS before resuspension in RPMI 1640, 10% FBS and incubation at 37°C, 5% CO2.

## *Fluorescence Activated Cell Sorting (FACS) (more detailed)*

The day after isolation cells were incubated with fluorochrome conjugated antibodies CD4-V450, CD62L-FITC, CD3-PE, and CD25-PE-Cy7 (BD Biosciences). Unbound antibody was washed away and cells sorted using a 4-laser FACS Aria IIu flow cytometer (Beckton Dickinson) running BD FACSDiva v6 Software.  An electronic acquisition gate applied to the Forward/Side scatter excluded debris and aggregates. A subsequent FACS for CD44-APC-Cy7 and CD69-APC (Affymetrix eBioscience) enabled sequential separation to a final naïve CD4+ T cell population defined by CD3+ CD4+ CD62L+ CD25- CD44- CD69-. Part of this population was fixed for FISH while another part was activated with 20 ng/ml PMA (Phorbol 12-myristate 13-acetate) (Sigma). After 24 h the active population was split for FISH and CD69-APC FACS analysis.

## *Lentivirus generation and transduction*

Lentiviruses encoding DamID constructs were generated as described in Robson et al, 2016 with several modifications. Briefly, non-replicative lentiviruses were generated by transfection of ~6 million 293FT cells plated in an 8.5 cm diameter tissue culture plate with 2.8 μg pMD2.G, 4.6 μg psPAX2 and 7.5 μg of the construct-specific transfer vector using 36 µl lipofectamine 2000 in 3 ml Opti-MEM as per the manufacturer’s instructions. After 16 h 293FT media was replaced. 48 h later the virus containing supernatant was aspirated, cleared of cellular debris by centrifugation for 10 min at 3,500 rpm and followed by filtration through a 0.45 μm2 low protein binding PES syringe filter (Millipore, SLHP003RS). Viruses were then concentrated by ultracentrifugation at 55,000 x *g* for 75 min at 4oC in a JA-25.5 rotor and resuspended in an appropriate volume of Opti-MEM. If not used immediately, aliquots were frozen at -80°C. Transduction was performed in the presence of 10 μg/ml protoamine sulphate.

To minimize the possibility of autoactivation, cells were diluted 1:6 and 1:10, respectively, in fresh media every 2-3 days in their normal culture. Centrifugation at 1,000 rpm for 5 min was also performed weekly during passaging to remove cellular debris.

## *Bioinformatics*

*External Published Datasets*

CTCF, H3K4me1 and H3K27ac ChIP-seq data for primary CD4+ T-cells was downloaded from the Epigenetics Roadmap Consortium (Bernstein et al. 2010; Kundaje et al. 2015), Naïve CD4+ T-cell RNA-seq data from Ni et al, 2016, and GM12878 cell RNA-seq from the ENCODE Project Consortium (The Encode Project (Consortium 2012). Gene expression microarray and DamID data for C2C12 myogenesis, as well as the positions of LADs and PI/IP regions, were extracted from Robson et al, 2016. Coordinates of H3K27ac-defined putative enhancer regions were extracted from Hnisz et al, 2013.

As stated in each relevant figure legend, for this study all Hi-C contact maps and the co-ordinates of chromosome structures, such as TADs, Contact Domains or compartments, were extracted from published datasets (Rao et al, 2014; Dixon et al, 2012). Additionally, the long-range interaction between the putative enhancer and CD200/BTLA that is displayed on Figure 7 was identified by Rao et al. using their HICCUP algorithm. This algorithm identifies loops between two points of DNA by determining the relative signal intensity between the interaction coordinate and its surrounding pixels. As such, interactions are registered as significant relative to other nearby interaction coordinates, which are subject to a similar distance separation.

*Jurkat T-cell Activation Gene Expression Analysis*

Genes differentially expressed in resting and activated Jurkat T-cells analyzed for Biological Process and GO-term enrichment using Gene Ontology enrichment analysis and visualization tool GOrilla (Salmon and Trono 2007). Genes upregulated during T-cell activation were significantly enriched in terms positively associated with T-cell activation while those downregulated were enriched in terms associated with negative regulation of the cell cycle. A full list of GO-terms enriched in genes upregulated and downregulated during T-cell activation can be found in Supplementary Fig. S1. To demonstrate the gene expression changes associated with GO-categories, specific GO-terms that either support T-cell activation or negatively regulate cell cycle were selected and displayed in Fig. 1. These terms are shown in Fig. S1.

## *DamID (more detailed)*

DamID was performed as described in (Vogel et al. 2007). Briefly for each DamID sample two million Jurkat cells were transduced with 1/10 of a Dam methylase encoding lentiviral preparation in the presence of 10 µg/ml protamine sulphate in a 3.5 cm diameter tissue culture dish. After 24 h cells were pelleted at 200 x *g* for 4 min and resuspended in fresh suspension cell growth media. Dam-control or Dam-Lamin B1-transduced Jurkat T-cells were then incubated with untransduced Raji B cells ±SEE and left a further 48 h, diluting cells in appropriate volumes of suspension cell growth media to sustain logarithmic growth, before proceeding with DNA extraction.

DamID sample processing was then performed as described in Vogel et al. Briefly, DNA was extracted from cells using the DNeasy tissue lysis kit (Qiagen) as per manufacturer’s instructions. 2.5 µg of extracted DNA was then digested by *DpnI* (NEB) and, following heat inactivation of *DpnI,* was ligated to the DamID adaptor duplex (dsAdR) generated from the oligonucleotides AdRt (5’-CTAATACGACTCACATAGGGCAGCGTGGTCGCGGCCGA-GGA-3’) and AdRb (5’-TCCTCGGCCG-3’) after which DNA was further digested by *DpnII*. To amplify DNA sequences methylated by the Dam methylase, 5 µl of *DpnII* digested material was then subjected to PCR in the supplied buffer in the presence of the 1.25 µM Adr-PCR primer (5’-GGTCGCGGCCGAGGATC-3’), 0.2 mM dNTPs and 1X of the Advantage cDNA polymerase (Clontech, cat. no. 639105). PCR was performed as described in Table 1.

**Table 1. PCR program for DNA amplification in DamID.**

| **Cycle** | **Denature** | **Anneal** | **Extend** |
| --- | --- | --- | --- |
| **1** |  |  | 68oC for 10 min |
| **2** | 94oC for 3 min | 65oC for 5 min | 68oC for 15 min |
| **3-6** | 94oC for 1 min | 65oC for 1 min | 68oC for 10 min |
| **7-23** | 94oC for 1 min | 65oC for 1 min | 68oC for 2 min |

Following PCR, the distribution of amplified DNA fragments was checked on agarose gels (Fig. 1). If samples were of sufficient quality DNA was purified on QIAquick PCR purification columns (Qiagen) and then concentrated to the required concentration by precipitation. To generate the 2 µg of material required of next generation sequencing it was found an average of 6-8 PCR reactions were required per sample.

## *DamID Sequencing and Analysis*

DamID sample libraries were prepared for next generation sequencing (Beijing Genomics) by fragmentation followed by ligation to sequencing adaptors. Libraries were then sequenced by 90 bp paired end (90PE) sequencing in reactions with 5 samples per well. DamID sequences were aligned to the human Hg19 genome using the Burrows-Wheeler Aligner software bwa-mem (Quinlan and Hall 2010). Subsequent processing was performed using R (R Core Team (2015). R: A language and environment for statistical computing. R Foundation for Statistical Computing, Vienna, Austria. URL [https://www.R-project.org/](https://www.r-project.org/)) and Bedtools (Eden et al. 2009). Resting and Activated Jurkat DamID data was quantified at a DpnI fragment level by counting the number of reads that overlapped each DpnI-flanked (GATC) genomic fragment for each pair of Dam-alone and Dam-LaminB1 samples. The log2 ratios between Dam-LaminB1 and Dam-alone were calculated for each DpnI fragment, and the resulting values quantile normalized in R using the BioConductor Limma package (Li and Durbin 2009) to allow a more quantifiable sample comparison.

## *Lamina Associated Domains (LADs) Definition*

Normalized data were smoothed by a ~15Kb window in order to stabilize noise, while maintaining the same number of data points. To identify LADs we used a circular binary segmentation algorithm in the Bioconductor package DNAcopy (Seshan VE and Olshen A (2016). DNAcopy: DNA copy number data analysis. R package version 1.46.0) using the default parameters. The positive signal tracts were extracted and merged if they were <8Kb apart. We removed anything below 15Kb from our LAD list. This threshold was chosen empirically after careful examination of the LAD traces as most of the smaller LADs are too close to noise. We counted a gene as being in a LAD if it overlapped with one.

## *Identification of Genomic Regions with Altered Peripheral Association*

To identify genomic regions with differential frequencies of association to the periphery, we subtracted each set of LADs from each other to obtain a set of regions uniquely present in each set. We filtered this set to eliminate anything smaller than 8Kb or with a signal difference (log2) lower than 0.3. This filter significantly reduces the number of false positives due to slight differences in the definition of LAD ends, or due to regions with very low intensity. Regions that were peripheral in resting cells and released after activation were denoted PI regions (for 'periphery-to-interior'). Conversely, regions that become specifically associated with the nuclear periphery after activation were denoted IP regions (for 'interior-to-periphery).

## *Analysis of LAD and/or PI region intersect with GM12878 Contact Domains and Compartments.*

To accurately compare the frequency with which LADs are completely enveloped within Contact Domains, 500 LADs were randomly selected and the number of times a LAD was found completely within a Contact Domain determined.  We then randomized the location of each LAD per chromosome in the down-sampled files and re-counted the frequency of envelopment. This process was repeated 1000 times to ensure all LADs in the genome were analyzed multiple times. Both the scripts and the data used for Fig. S3 can be retrieved from the github site: <https://github.com/AlastairKerr/Robson2016>). The significance of the difference in distribution between observed and randomized was determined by KS test.

In order to determine their relative enrichment in GM12878 sub-compartments, the degree of overlap of each individual LADs or PI regions was determined and contrasted to that expected in a genome where LADs or PI regions had been randomly shuffled. The significance of the distribution between observed and randomized was determined by KS test.

## *Fluorescence In Situ Hybridization (more detailed)*

For FISH experiments Resting and Activated Jurkat or primary CD4+ T-cells cells were pelleted at 200 x g for 5 min and resuspended in PBS. Cells were then plated onto poly-lysine coated coverslips, left for 5 minutes and then fixated in 4% para-formaldehyde, 1X PBS for 10 min at room temperature. After aging coverslips for several days, cells were permeabilized for 6 min with 0.2% Triton-X-100 in PBS, followed by 3 washes in PBS. If antibody staining was required coverslips were blocked with 1% BSA prior to sequential incubations with primary and secondary antibodies. After washing, antibodies were fixed for 45 s in 2% paraformaldehyde, PBS. Cells were next pre-equilibrated in 2X SCC and treated with RNase A (100µg/ml) at 37ºC for 1 h. Following washing in 2X SCC, cells were dehydrated with a 70%, 85% and 100% ethanol series. Coverslips were then air dried, heated to 70ºC and submerged into 85ºC preheated 70% formamide, 2X SSC (pH 7.0) for 21 min. A second ethanol dehydration series was then performed using -20ºC 70% ethanol for the first step. Coverslips were air dried and 150-300 ng biotin-/digoxigenin-/fluorophore-labelled probe was added in hybridization buffer (50% formamide, 2X SSC, 1% Tween20, 10% Dextran Sulphate) containing 6 µg human Cot1 DNA (Invitrogen) and sheared salmon sperm DNA and incubated at 37°C for 24 h in a humidified chamber. After incubation, the coverslips were washed four times for 3 min each in 2X SSC at 50ºC followed by four times for 3 min each in 0.1X SSC at 65ºC. Coverslips were then pre-equilibrated in 2X SSC, 0.1% Tween-20 and blocked with 4% BSA before incubating for 1 h at room temperature with Alexa Fluor®conjugated-Steptavidin/anti-dioxigenin antibodies and 4,6-diamidino-2 phenylindole, dihydrochloride (DAPI) at 2 µg/ml. Coverslips were subsequently washed 3 times in 2X SSC, 0.1% Tween-20 at 37ºC and mounted on slides in Vectashield (Vector Labs). BACs were ordered as indicated in Table 2.

**Table 2. List of FISH probes.**

| **Locus** | **Clone ID** | **Chr** | **Start Coordinate** | **End Coordinate** |
| --- | --- | --- | --- | --- |
| GBP i | WI2-1164H23 | 1 | 89,225,254 | 89,263,381 |
| GBP ii | WI2-1912I12 | 1 | 89,441,903 | 89,486,300 |
| GBP iii | WI2-2752H5 | 1 | 89,657,420 | 89,702,009 |
| GBP iv | WI2-526L3 | 1 | 89,876,247 | 89,917,750 |
| GBP v | WI2-1217K14 | 1 | 90,091,207 | 90,135,261 |
| VCAM1 i | WI2-2673A12 | 1 | 100,736,026 | 100,781,301 |
| VCAM1 ii | WI2-1322N21 | 1 | 100,934,306 | 100,971,590 |
| VCAM1 iii | WI2-1574P13 | 1 | 101,119,857 | 101,157,755 |
| VCAM1 iv | WI2-569L23 | 1 | 101,303,334 | 101,342,416 |
| VCAM1 v | WI2-481B14 | 1 | 101,490,965 | 101,526,327 |
| Putative Enhancer | WI2-898A6 | 3 | 98,250,119 | 98,286,966 |
| NFKBIZ | WI2-645D14 | 3 | 101,546,513 | 101,590,433 |
| CBLB | WI2-628H6 | 3 | 105,507,827 | 105,545,557 |
| BTLA | WI2-1965N10 | 3 | 112,175,307 | 112,212,883 |
| CD200 | WI2-526H19 | 3 | 112,039,557 | 112,083,246 |
| IL2 | CH17-337H11 | 4 | 123,272,797 | 123,467,914 |
| TNFa | CH17-119I1 | 6 | 31,527,402 | 31,735,928 |
| IL2RA | CH17-215L21 | 10 | 5,959,657 | 6,190,768 |
| CCND2 | WI2-2236P14 | 12 | 4,261,002 | 4,303,424 |

## *Microscopy*

Images were acquired on a Nikon TE-200 microscope using a 1.45 NA 100x objective, Sedat quad filter set, PIFOC Z-axis focus drive (Physik Instrubments) and a CoolSnapHQ High Speed Monochrome CCD camera (Photometrics) run by Metamorph image acquisition software. Distance measurements were performed on a minimum of 50 nuclei per sample.

(Bernstein et al. 2010; Consortium 2012; Kundaje et al. 2015; Ni et al. 2016; Robson et al. 2016)

# Supplemental References

Bernstein BE, Stamatoyannopoulos JA, Costello JF, Ren B, Milosavljevic A, Meissner A, Kellis M, Marra MA, Beaudet AL, Ecker JR et al. 2010. The NIH Roadmap Epigenomics Mapping Consortium. *Nature biotechnology* **28**: 1045-1048.

Eden E, Navon R, Steinfeld I, Lipson D, Yakhini Z. 2009. GOrilla: a tool for discovery and visualization of enriched GO terms in ranked gene lists. *BMC bioinformatics* **10**: 48.

Kundaje A, Meuleman W, Ernst J, Bilenky M, Yen A, Heravi-Moussavi A, Kheradpour P, Zhang Z, Wang J, Ziller MJ et al. 2015. Integrative analysis of 111 reference human epigenomes. *Nature* **518**: 317-330.

Li H, Durbin R. 2009. Fast and accurate short read alignment with Burrows-Wheeler transform. *Bioinformatics* **25**: 1754-1760.

Ni T, Yang W, Han M, Zhang Y, Shen T, Nie H, Zhou Z, Dai Y, Yang Y, Liu P et al. 2016. Global intron retention mediated gene regulation during CD4+ T cell activation. *Nucleic Acids Res* **44**: 6817-6829.

Quinlan AR, Hall IM. 2010. BEDTools: a flexible suite of utilities for comparing genomic features. *Bioinformatics* **26**: 841-842.

Rao SS, Huntley MH, Durand NC, Stamenova EK, Bochkov ID, Robinson JT, Sanborn AL, Machol I, Omer AD, Lander ES et al. 2014. A 3D map of the human genome at kilobase resolution reveals principles of chromatin looping. *Cell* **159**: 1665-1680.

Robson MI, de Las Heras JI, Czapiewski R, Le Thanh P, Booth DG, Kelly DA, Webb S, Kerr AR, Schirmer EC. 2016. Tissue-Specific Gene Repositioning by Muscle Nuclear Membrane Proteins Enhances Repression of Critical Developmental Genes during Myogenesis. *Molecular Cell* **62**: 834-847.

Salmon P, Trono D. 2007. Production and titration of lentiviral vectors. *Current protocols in human genetics / editorial board, Jonathan L Haines [et al]* **Chapter 12**: Unit 12 10.

Schirmer EC, Guan T, Gerace L. 2001. Involvement of the lamin rod domain in heterotypic lamin interactions important for nuclear organization. *The Journal of Cell Biology* **153**: 479-489.

The Encode Project Consortium. 2012. An integrated encyclopedia of DNA elements in the human genome. *Nature* **489**: 57-74.

Vogel MJ, Peric-Hupkes D, van Steensel B. 2007. Detection of in vivo protein-DNA interactions using DamID in mammalian cells. *Nature protocols* **2**: 1467-1478.
