# Supplementary material for: Constrained release of lamina-associated enhancers and genes from the nuclear envelope during T-cell activation facilitates their association in chromosome compartments
Source: HighWire-hosted journal article supplement (doi:10.1101/gr.212308.116), 2017-04-19
Supplement: Supplemental_Table_1.xlsx [file Supplemental_Table_1.xlsx]

## Sheet: 161122 - Jurkat DamID and micro
Supplemental Table 1. Table of DamID and Gene Expression Changes during Jurkat T-cell Activation
Grey - Gene ID, position and microarray probe sequences.
Blue - Sumarised data for genes overlap with LADs, presence within regions of differential association with the lamina (Interior to Periphery - IP, Periphery to interior - PI) and gene expression changes during T-cell activation (e0 - no change, e1 - increased expression, e2 - decreased expression).
Red - log2(Lamin B1/Dam) or Δlog2(Rest. DamID-Act. DamID) as average values across gene body.
Orange - Δlog2 changes in expression between Rest. and Act. Jurkat T-cells.
Green - False discovery rate (FDR) values Δlog2 changes in Orange section.
Purple - log2(Array Signal Values) for Rest. And 8, 24 and 48 h Act. Jurkat T-cells.
Gene Name	Description	GeneID	Alternate dbXrefs	Synonyms	Nucleotide Ref	Sequence of Microarray Probe	Chromosome	Start Coordinate	End Coordinate	Strand	Overlap with LAD in Rest.	Overlap with LAD in Act.	Overlap with PI Region	Overlap with PI Region	Gene Type (II, PP, IP, PI or Ambiguous)	Expr change Rest.-->Act.	Gene body log2(Lamin B1/Dam) Rest.	Gene body log2(Lamin B1/Dam) Act.	log2(Rest-Act)	Δlog2(expr Rest.-expr 8 h Act.)	Δlog2(expr Rest.-expr 24 h Act.)	Δlog2(expr Rest.-expr 48 h Act.)	FDR(expr Rest.-expr 8 h Act.)	FDR(expr Rest.-expr 24 h Act.)	FDR(expr Rest.-expr 48 h Act.)	Δlog2(expr Rest.)	Δlog2(expr 8 h Act.)	Δlog2(expr 24 h Act.)	Δlog2(expr 48 h Act.)
WASH7P	WAS protein family homolog 7 pseudogene	653635	HGNC:38034|Ensembl:ENSG00000227232	FAM39F|WASH5P	NR_024540	CAGGGAAGTGGTTGACCCCTCCGGTGGCTGGCCACTCTGCTAGAGTCCAT	chr1	14361	29370	-	N	N	N	N	II1	e0	-7.01	-4.18	2.83	-0.0821452	-0.130715	-0.143508	0.773839	0.588711	0.569979	7.59834	7.51619	7.46762	7.45483
FAM138A	family with sequence similarity 138, member A	645520	HGNC:32334|Ensembl:ENSG00000237613	F379	NR_026818	AGGGGGCAGGAATTGGGGGTGACAGGAGAGCTGTAAGGTCTCCAGTGGGT	chr1	34610	36081	-	N	N	N	N	II1	e0	-5.92	-2.94	2.98	0.133177	0.17436	0.00202839	0.428614	0.252974	0.994666	6.99693	7.1301	7.17129	6.99895
OR4F5	olfactory receptor, family 4, subfamily F, member 5	79501	HGNC:14825|HPRD:14974	-	NM_001005484	TGTGTGGCAACGCATGTGTCGGCATTATGGCTGTCACATGGGGAATTGGC	chr1	69090	70008	+	N	N	N	N	II1	e0	-5.17	-3.02	2.15	-0.117104	0.0917669	0.0572898	0.357561	0.523228	0.769833	6.79343	6.67632	6.88519	6.85072
LOC729737	uncharacterized LOC729737	729737	-	-	NR_039983	GGATTACAGGTAAGTGCCACCACACCCAGCTGATTTTTGTGTTTTTTGTA	chr1	134772	140566	-	N	N	N	N	II1	e0	-3.93	-4.41	-0.48	0.0330006	-0.00218372	-0.0163616	0.88786	0.992262	0.955934	6.71629	6.74929	6.71411	6.69993
LOC100133331	uncharacterized LOC100133331	100133331	-	-	NR_028327	TAAAGTGCCTAATAAATGCAAATGTGCTTACATCTTTTGGCCCAGCTCCT	chr5	180750506	180755196	+	N	N	N	N	II1	e0	-0.1	-2.63	-2.53	-0.00395816	0.0102765	0.030533	0.987149	0.967085	0.905423	6.70115	6.69719	6.71142	6.73168
RP4-669L17.10	uncharacterized LOC100132287	100132287	-	-	NR_028322	GATGCTCATAGGAGAACGCACCCTGTTGTGAACCGTGCATGTGAGGGATC	chr5	180750506	180755196	+	N	N	N	N	II1	e0	-0.1	-2.63	-2.53	0.169833	0.236097	0.143941	0.331963	0.136577	0.483901	6.87373	7.04357	7.10983	7.01768
OR4F29	olfactory receptor, family 4, subfamily F, member 29	729759	HGNC:31275|Ensembl:ENSG00000235249|HPRD:14971|Vega:OTTHUMG00000002860	OR7-21	NM_001005221	AGTCATCTCCTTTGGAGGCTGCATCGCTCAAATCTTCTTCATCCACGTCG	chr5	180794287	180795226	+	N	N	N	N	II1	e0	0	-3.91	-3.91	-0.0210764	0.0816167	-0.0298261	0.92649	0.61247	0.906207	6.77099	6.74991	6.8526	6.74116
OR4F16	olfactory receptor, family 4, subfamily F, member 16	81399	HGNC:15079|Ensembl:ENSG00000185097|HPRD:14969|Vega:OTTHUMG00000002581	OR1-1|OR7-21	NM_001005277	TTTATGACCTGTTCAGAAAGCGCAAAGTCATCTCCTTTGGAGGCTGCATC	chr5	180794287	180795226	+	N	N	N	N	II1	e0	0	-3.91	-3.91	0.0923854	0.0661113	0.0431204	0.621916	0.755551	0.879102	6.71939	6.81177	6.7855	6.76251
OR4F3	olfactory receptor, family 4, subfamily F, member 3	26683	HGNC:8300|Ensembl:ENSG00000230178|HPRD:14972|Vega:OTTHUMG00000162081	-	NM_001005224	GATATGTGGCCCTATGTAAGCCCCTCCACTATCTGACCATTATGAGCCCA	chr5	180794287	180795226	+	N	N	N	N	II1	e0	0	-3.91	-3.91	-0.0572273	-0.0510829	-0.0142267	0.704033	0.744763	0.952702	6.74687	6.68964	6.69578	6.73264
FAM87B	family with sequence similarity 87, member B	400728	HGNC:32236|Ensembl:ENSG00000177757	-	NR_103536	AGCAAACCACCGCTGAAAGGCAACGTTATTTCTGTTGGCAGAAGGCGGCC	chr1	752750	755214	+	N	N	N	N	II1	e0	-7.59	-4.48	3.11	0.054859	0.069596	-0.0232873	0.748296	0.65679	0.922541	6.75669	6.81155	6.82628	6.7334
LINC00115	long intergenic non-protein coding RNA 115	79854	HGNC:26211|Ensembl:ENSG00000225880|HPRD:08000	NCRNA00115	NR_024321	GCAGAGAGGGCAGCAGAAGCCTAATTCCCAAATTCCTTAGTGGTTTTCTG	chr1	761585	762902	-	N	N	N	N	II1	e0	-7.9	-8.78	-0.88	0.0578015	0.0818473	0.0402069	0.694702	0.531354	0.835051	6.81184	6.86965	6.89369	6.85205
LINC01128	uncharacterized LOC643837	643837	Ensembl:ENSG00000228794	-	NR_015368	CGTGTGCCATGTGAGCCTGTTTCCTTTCTACAGTCACCAGTTCACGCAGC	chr1	762970	794826	+	N	N	N	N	II1	e0	-7.94	-4.47	3.47	-0.00179161	-0.0142784	0.0662868	0.994239	0.956918	0.770946	6.74724	6.74544	6.73296	6.81352
FAM41C	family with sequence similarity 41, member C	284593	HGNC:27635|Ensembl:ENSG00000230368	-	NR_027055	GCGGAATGTGTCCAGGTGTTGAAGCTCTTGATGGCGAAAGGAACAGCAAG	chr1	803450	812182	-	N	N	N	N	II1	e0	-4.4	-2.64	1.76	-0.0567801	-0.0919472	-0.0757811	0.668875	0.400029	0.559585	6.79451	6.73773	6.70257	6.71873
LOC100130417	uncharacterized LOC100130417	100130417	-	-	NR_026874	TAAGATTAAACGGGGGCTCAGGAGAGGACCAGCGTCAGGCTCACTGCGAG	chr1	852952	854817	-	N	N	N	N	II1	e0	-9.9	-6.32	3.58	0.0874629	0.159931	0.0336192	0.454417	0.0966427	0.861647	6.80772	6.89519	6.96766	6.84134
SAMD11	sterile alpha motif domain containing 11	148398	HGNC:28706|Ensembl:ENSG00000187634|HPRD:10081|Vega:OTTHUMG00000040719	-	NM_152486	CAAACTTCACCCAAGCAGGAGAATGGGACCTTGGCTCTACTTCCAGGGGC	chr1	861120	879961	+	N	N	N	N	II1	e0	-9.01	-5.69	3.32	-0.0740494	-0.068338	-0.0869627	0.728039	0.752825	0.698728	7.04964	6.97559	6.9813	6.96268
NOC2L	nucleolar complex associated 2 homolog (S. cerevisiae)	26155	HGNC:24517|MIM:610770|Ensembl:ENSG00000188976|HPRD:13166|Vega:OTTHUMG00000040720	NET15|NET7|NIR	NM_015658	GAGAGGGATACTGAGGCCCCTGAGCACTCGGCATGGGGTGGAAGACGATG	chr1	879582	894679	-	N	N	N	N	II1	e0	-6.66	-5.38	1.28	-0.0563944	-0.211591	-0.127556	0.809242	0.13609	0.490067	7.8806	7.8242	7.66901	7.75304
KLHL17	kelch-like family member 17	339451	HGNC:24023|Ensembl:ENSG00000187961|HPRD:13926|Vega:OTTHUMG00000040721	RP11-54O7.6	NM_198317	AGTGCCACGGCTGCCCGTTTACACCTTTAGCGTCTGGTCCTCCTGCGTGT	chr1	895966	901099	+	N	N	N	N	II1	e0	-7.53	-4.37	3.16	-0.244546	-0.286863	-0.226853	0.034418	0.014497	0.0582357	7.44165	7.19711	7.15479	7.2148
PLEKHN1	pleckstrin homology domain containing, family N member 1	84069	HGNC:25284|Ensembl:ENSG00000187583|HPRD:13190|Vega:OTTHUMG00000040756	RP11-54O7.7	NM_001160184	ACGGGCGTGAAGGTCGGAGGACAGAGAAAGGTCAGCAGGGTCAGAGTATG	chr1	901876	910484	+	N	N	N	N	II1	e0	-7.85	-5.1	2.75	0.20612	0.0606276	0.127074	0.138428	0.782366	0.483957	6.78882	6.99494	6.84945	6.9159
PERM1	chromosome 1 open reading frame 170	84808	HGNC:28208|Ensembl:ENSG00000187642|Vega:OTTHUMG00000040757	RP11-54O7.8	NR_027693	TGCAGAAAGGGATGCAGGGGACGTGGTATTTTTGGCACAGGGGGAGGAGC	chr1	910578	917473	-	N	N	N	N	II1	e0	-7.58	-5.62	1.96	0.113102	0.102304	0.0642714	0.302094	0.373298	0.678417	6.91267	7.02577	7.01497	6.97694
HES4	hairy and enhancer of split 4 (Drosophila)	57801	HGNC:24149|MIM:608060|Ensembl:ENSG00000188290|HPRD:16273|Vega:OTTHUMG00000040758	bHLHb42	NM_021170	CCCCGTTCTAGGGCCGTGGCCTTTGCCGAGACTGTAGCAGAGAAAACGTA	chr1	934341	935552	-	N	N	N	N	II1	e2	-8.6	-5.56	3.04	0.0415635	-1.29774	-1.27296	0.939742	7.23245e-05	9.29577e-05	11.525	11.5665	10.2272	10.252
ISG15	ISG15 ubiquitin-like modifier	9636	HGNC:4053|MIM:147571|Ensembl:ENSG00000187608|HPRD:00958|Vega:OTTHUMG00000040777	G1P2|IFI15|IP17|UCRP|hUCRP	NM_005101	ACCTGAAGCAGCAAGTGAGCGGGCTGGAGGGTGTGCAGGACGACCTGTTC	chr1	948846	949919	+	N	N	N	N	II1	e0	-11.85	-10.01	1.84	0.150656	0.456156	0.287479	0.669601	0.0603159	0.325074	10.6733	10.8239	11.1294	10.9608
AGRN	agrin	375790	HGNC:329|MIM:103320|Ensembl:ENSG00000188157|HPRD:10550|Vega:OTTHUMG00000040778	-	NM_198576	CCTCCCCACAGCGTCAGTGAAAGTCGTCCTTGTCTCAGAATGACCAGGGG	chr1	955502	991499	+	N	N	N	N	II1	e0	-5.9	-4.65	1.25	-0.098941	-0.189083	-0.204768	0.714721	0.364284	0.345397	7.89707	7.79813	7.70799	7.6923
RNF223	ring finger protein 223	401934	HGNC:40020	-	NM_001205252	GCATTTGCGGCGTGAGGAGCCTGTGTGGCTGGAGGGCACCAAGCTGTGCT	chr1	1007125	1009687	-	N	N	N	N	II1	e0	-7.08	-5.77	1.31	-0.0340872	-0.0429329	-0.0506543	0.875249	0.828123	0.81914	6.85442	6.82033	6.81149	6.80377
C1orf159	chromosome 1 open reading frame 159	54991	HGNC:26062|Ensembl:ENSG00000131591|HPRD:07930|Vega:OTTHUMG00000000745	-	NM_017891	GCAGCCACCCATTTCCGGAGCTGCAGGATAGAGCTTCCTCTTGATCTCTG	chr1	1017197	1051736	-	N	N	N	N	II1	e0	-5.51	-6.19	-0.68	0.0733737	-0.338258	-0.116197	0.724728	0.0125116	0.540148	7.77032	7.8437	7.43206	7.65413
MIR200B	microRNA 200b	406984	HGNC:31579|MIM:612091|Ensembl:ENSG00000207730|miRBase:MI0000342	MIRN200B	NR_029639	GGGCAGCATTGGATGGAGTCAGGTCTCTAATACTGCCTGGTAATGATGAC	chr1	1102483	1102578	+	N	N	N	N	II1	e0	-1.44	-0.08	1.36	0.105443	0.0349217	0.0919581	0.485846	0.873023	0.607075	6.74355	6.84899	6.77847	6.83551
MIR200A	microRNA 200a	406983	HGNC:31578|MIM:612090|Ensembl:ENSG00000207607|miRBase:MI0000737	MIRN200A	NR_029834	TCTTACCGGACAGTGCTGGATTTCCCAGCTTGACTCTAACACTGTCTGGT	chr1	1103242	1103332	+	N	N	N	N	II1	e0	-1.44	-0.08	1.36	-0.0099834	-0.152164	-0.00965824	0.965822	0.166816	0.969791	6.84204	6.83206	6.68988	6.83238
MIR429	microRNA 429	554210	HGNC:13784|MIM:612094|Ensembl:ENSG00000198976|miRBase:MI0001641	MIRN429|hsa-mir-429	NR_029957	CCAGACATGGTTAGACCTGGCCCTCTGTCTAATACTGTCTGGTAAAACCG	chr1	1104384	1104467	+	N	N	N	N	II1	e0	0	5.1	5.1	-0.0356978	-0.036207	-0.0350576	0.875236	0.869122	0.892679	6.79815	6.76245	6.76194	6.76309
TTLL10	tubulin tyrosine ligase-like family, member 10	254173	HGNC:26693|Ensembl:ENSG00000162571|HPRD:08771|Vega:OTTHUMG00000000851	TTLL5	NM_001130045	GGACGGCAGCGCTCAGAGGAGCCTCCAGTTACTTTCCTCACATCTCCCAA	chr1	1109285	1133313	+	N	N	N	N	II1	e0	-5.43	-6.01	-0.58	-0.0175912	-0.0625652	-0.0126982	0.929989	0.666367	0.95824	6.65845	6.64086	6.59588	6.64575
TNFRSF18	tumor necrosis factor receptor superfamily, member 18	8784	HGNC:11914|MIM:603905|Ensembl:ENSG00000186891|HPRD:04879|Vega:OTTHUMG00000001414	AITR|CD357|GITR|GITR-D	NM_004195	AAGGCCACTGCAAACCTTGGACAGACTGCTGCTGGAGGTGCCGCCGTCGA	chr1	1138887	1142089	-	N	N	N	N	II1	e0	-7.6	-2.43	5.17	0.146493	0.00420389	0.0518889	0.148793	0.983376	0.76548	6.75132	6.89781	6.75552	6.80321
TNFRSF4	tumor necrosis factor receptor superfamily, member 4	7293	HGNC:11918|MIM:600315|Ensembl:ENSG00000186827|HPRD:02636|Vega:OTTHUMG00000001415	ACT35|CD134|OX40|TXGP1L	NM_003327	ATGCCATGCATACCTCCTGCCCCGCGGGACCACAATAAAAACCTTGGCAG	chr1	1146705	1149548	-	N	N	N	N	II1	e1	-5.85	-3.3	2.55	2.3607	1.16442	0.890038	8.63699e-09	1.36123e-05	0.000183784	7.54523	9.90593	8.70965	8.43526
SDF4	stromal cell derived factor 4	51150	HGNC:24188|MIM:614282|Ensembl:ENSG00000078808|HPRD:13113|Vega:OTTHUMG00000001812	Cab45|SDF-4	NM_016176	ATGAACGAGTACAACGCGCTGAACGAGGCCAAGCAGATGATCGCCGTCGC	chr1	1152287	1167447	-	N	N	N	N	II1	e1	-6.81	-6.59	0.22	0.505551	-0.0249805	0.105821	0.00678738	0.948812	0.738245	8.94311	9.44867	8.91813	9.04894
B3GALT6	UDP-Gal:betaGal beta 1,3-galactosyltransferase polypeptide 6	126792	HGNC:17978|MIM:615291|Ensembl:ENSG00000176022|HPRD:12509|Vega:OTTHUMG00000001813	EDSP2|SEMDJL1|beta3GalT6	NM_080605	GTTTGGAATTGCTTGAGGAACCCTGCGTGTGCTTGGAGAGGCCAGAGGGC	chr1	1167628	1170420	+	N	N	N	N	II1	e0	-9.06	-6.33	2.73	0.257381	-0.363581	-0.308564	0.175569	0.0438413	0.104018	9.43654	9.69392	9.07296	9.12798
FAM132A	family with sequence similarity 132, member A	388581	HGNC:32308|Ensembl:ENSG00000184163|Vega:OTTHUMG00000001412	C1QDC2|C1QTNF12|CTRP12	NM_001014980	CGGGACGTGGTGTGTGTTCTCATCTGTATTGAGTCCCTGTGCCAGCGCCA	chr1	1177825	1182102	-	N	N	N	N	II1	e0	-4.85	-5.32	-0.47	-0.0343332	-0.198048	-0.0833334	0.878647	0.105303	0.653558	6.80384	6.76951	6.60579	6.72051
UBE2J2	ubiquitin-conjugating enzyme E2, J2	118424	HGNC:19268|Ensembl:ENSG00000160087|HPRD:15600	NCUBE-2|NCUBE2|PRO2121	NM_058167	ACGGCCGCCGGCAAGAAACCCACCCTGTCCGGAGGCGGGCGTGAGACAAG	chr1	1189291	1209234	-	N	N	N	N	II1	e0	-7.39	-5.94	1.45	0.642505	0.236926	0.216706	0.0586621	0.624807	0.696419	8.11026	8.75276	8.34718	8.32696
SCNN1D	sodium channel, non-voltage-gated 1, delta subunit	6339	HGNC:10601|MIM:601328|Ensembl:ENSG00000162572|HPRD:03209|Vega:OTTHUMG00000002081	ENaCd|ENaCdelta|SCNED|dNaCh	NM_001130413	CAAGGCAGGCCCCACGGACACACTTGGGCTGCTCTGAAATAAAGCTGTTG	chr1	1215815	1227409	+	N	N	N	N	II1	e0	-5.5	-4.89	0.61	0.165077	-0.49093	-0.30224	0.501967	0.0111958	0.14609	8.08858	8.25366	7.59765	7.78634
ACAP3	ArfGAP with coiled-coil, ankyrin repeat and PH domains 3	116983	HGNC:16754|Ensembl:ENSG00000131584|HPRD:10820|Vega:OTTHUMG00000002235	CENTB5	NM_030649	GTGAGTTCCTGCTGCAAAACGGAGCGGACGTGAACCAAAGAGACAGCCGG	chr1	1227763	1243269	-	N	N	N	N	II1	e0	-6.81	-5.17	1.64	-0.290007	-0.278306	-0.136132	0.0927394	0.113351	0.584621	6.99928	6.70927	6.72097	6.86315
PUSL1	pseudouridylate synthase-like 1	126789	HGNC:26914|Ensembl:ENSG00000169972|HPRD:08301|Vega:OTTHUMG00000003361	-	NM_153339	GGCCACAGTTCGGGAGCCACGGATGACCCTGGACACTCAAGCCAAAGTTA	chr1	1243993	1247057	+	N	N	N	N	II1	e0	-9.62	-4.21	5.41	0.243225	-0.0258606	0.0130328	0.0661762	0.920798	0.96781	7.47786	7.72109	7.452	7.4909
CPSF3L	cleavage and polyadenylation specific factor 3-like	54973	HGNC:26052|MIM:611354|Ensembl:ENSG00000127054|HPRD:13377|Vega:OTTHUMG00000003330	CPSF73L|INT11|INTS11|RC-68|RC68	NM_017871	TGGACCTACCAGGACGAGGAGCTGGGGAGCTTCCTCACATCTCTGCTGAA	chr1	1246964	1260067	-	N	N	N	N	II1	e0	-6	-3.79	2.21	-0.201463	-0.367673	-0.22372	0.0710259	0.00179492	0.0495108	8.29763	8.09616	7.92995	8.07391
GLTPD1	glycolipid transfer protein domain containing 1	80772	HGNC:28116|Ensembl:ENSG00000224051|Vega:OTTHUMG00000003171	CPTP	NM_001029885	GCCTGGCCACTGGCTCTTCACAGTGGACCCCAGCACCTCGGGGTGGCAGA	chr1	1260142	1264276	+	N	N	N	N	II1	e0	-6.28	-5.04	1.24	-0.0770814	0.0530917	0.0601039	0.688448	0.806048	0.80496	7.04378	6.9667	7.09687	7.10388
TAS1R3	taste receptor, type 1, member 3	83756	HGNC:15661|MIM:605865	T1R3	NM_152228	GTATAGCGTGGCCCAGGCCCTGCACAACACTCTTCAGTGCAACGCCTCAG	chr1	1266725	1269844	+	N	N	N	N	II1	e0	-5.58	-3.26	2.32	0.00800729	0.0492049	0.014743	0.971281	0.758804	0.951186	6.70987	6.71787	6.75907	6.72461
DVL1	dishevelled segment polarity protein 1	1855	HGNC:3084|MIM:601365|Ensembl:ENSG00000107404|HPRD:03220|Vega:OTTHUMG00000003069	DVL|DVL1L1|DVL1P1	NM_004421	ACAAACGCCGGCGGAGGAAGCAGCGCCTTCGGCAGGCGGACCGGGCCTCC	chr1	1270657	1284492	-	N	N	N	N	II1	e0	-5.84	-4.7	1.14	-0.059633	-0.0170834	0.0141109	0.763151	0.946786	0.962207	6.78261	6.72298	6.76553	6.79672
MXRA8	matrix-remodelling associated 8	54587	HGNC:7542|Ensembl:ENSG00000162576|HPRD:11330|Vega:OTTHUMG00000002973	-	NM_001282585	GGGCTGTACACCTGCAACCTGCACCATCACTACTGCCACCTCTACGAGAG	chr1	1288068	1293927	-	N	N	N	N	II1	e0	-3.29	-1.78	1.51	0.0726611	0.14932	0.0922261	0.529154	0.0999366	0.419286	6.66852	6.74118	6.81784	6.76074
AURKAIP1	aurora kinase A interacting protein 1	54998	HGNC:24114|MIM:609183|Ensembl:ENSG00000175756|HPRD:16457|Vega:OTTHUMG00000001413	AIP|AKIP	NM_017900	CGCCCGTTGCTGCTGTGATCCGTAGTAATAAATTCTCAGAGGACTCAGCC	chr1	1309109	1310818	-	N	N	N	N	II1	e0	-8.14	-5.21	2.93	0.301531	0.293337	0.160146	0.371895	0.395888	0.748659	11.2433	11.5448	11.5366	11.4035
CCNL2	cyclin L2	81669	HGNC:20570|MIM:613482|Ensembl:ENSG00000221978|HPRD:10815|Vega:OTTHUMG00000002917	ANIA-6B|CCNM|HCLA-ISO|HLA-ISO|PCEE|SB138	NM_030937	TGCTGGATGGTACCTCGGGGTTCTCCCATGTCAGTGGTCTCAATGTATTG	chr1	1321090	1334718	-	N	N	N	N	II1	e0	-10.03	-7.42	2.61	0.15992	0.0979749	0.121508	0.114566	0.416714	0.30429	6.84035	7.00027	6.93832	6.96186
LOC148413	uncharacterized LOC148413	148413	Ensembl:ENSG00000224870|Vega:OTTHUMG00000002908	-	NR_015434	AGCCTTGGAAGCAGGGTGTGCTCCTCGGTGTGGTCGCTCGATACCAGAAA	chr1	1334909	1337426	+	N	N	N	N	II1	e0	-8.64	-5.36	3.28	0.151448	0.189556	0.0659583	0.342211	0.201437	0.797386	9.42011	9.57156	9.60967	9.48607
MRPL20	mitochondrial ribosomal protein L20	55052	HGNC:14478|MIM:611833|Ensembl:ENSG00000242485|HPRD:14746|Vega:OTTHUMG00000002916	L20mt|MRP-L20	NM_017971	GGCCTGCAGGCGCCATGGTCTTCCTCACCGCGCAGCTCTGGCTGCGGAAT	chr1	1337275	1342693	-	N	N	N	N	II1	e0	-5.59	-7.36	-1.77	0.41621	0.290396	0.10678	0.0337492	0.164082	0.760912	10.3784	10.7946	10.6688	10.4852
ANKRD65	ankyrin repeat domain 65	441869	HGNC:42950|Ensembl:ENSG00000235098|Vega:OTTHUMG00000002911	-	NM_001145210	TGCAGGCCTGGTGACGCAGCTGCTGCGGCAAGGTGCCAGCGTGGAGGAGA	chr1	1353799	1356824	-	N	N	N	N	II1	e0	-7.5	-7.8	-0.3	-0.0746697	0.0121182	-0.052138	0.650137	0.960024	0.809895	6.76705	6.69238	6.77916	6.71491
TMEM88B	transmembrane protein 88B	643965	HGNC:37099|Ensembl:ENSG00000205116|Vega:OTTHUMG00000153395	-	NM_001146685	TCGTCTACCTGGGATTCCTGTGCCACTCGAGGGTCCACCCCGCTCCGGGT	chr1	1361507	1363167	+	N	N	N	N	II1	e0	-3.39	-3.04	0.35	-0.0162601	0.0447351	0.0386715	0.944065	0.814222	0.869105	6.77741	6.76115	6.82215	6.81609
VWA1	von Willebrand factor A domain containing 1	64856	HGNC:30910|MIM:611901|Ensembl:ENSG00000179403|HPRD:18292|Vega:OTTHUMG00000002975	WARP	NM_199121	ACTGACAGGAAACCTTCCGTCGTGAGGGAGCACTTCCCAGGGGCCGCAGG	chr1	1370902	1378262	+	N	N	N	N	II1	e0	-7.56	-4.76	2.8	-0.0819558	-0.0726191	0.024934	0.629888	0.684638	0.92678	6.91551	6.83356	6.84289	6.94045
ATAD3C	ATPase family, AAA domain containing 3C	219293	HGNC:32151|Ensembl:ENSG00000215915|HPRD:13426|Vega:OTTHUMG00000000531	-	NM_001039211	TTTTGGCAATAGAGTCTTGCTCGCCCAGGGTGGAGTGCAGTGGTGTGATC	chr1	1385068	1405538	+	N	N	N	N	II1	e0	-3.35	-4.84	-1.49	-0.00703568	0.0304531	-0.0714302	0.978448	0.895888	0.734818	6.77378	6.76674	6.80423	6.70235
ATAD3B	ATPase family, AAA domain containing 3B	83858	HGNC:24007|MIM:612317|Ensembl:ENSG00000160072|HPRD:10679|Vega:OTTHUMG00000000577	AAA-TOB3|TOB3	NM_031921	GTTGGAGCAACAGTCCAAGCTCAAAGAGTATGAGGCCGCCGTGGAGCAGC	chr1	1407163	1431582	+	N	N	N	N	II1	e0	-5.65	-7	-1.35	0.134466	0.25544	0.310691	0.379079	0.0490076	0.0181304	7.25557	7.39004	7.51101	7.56627
ATAD3A	ATPase family, AAA domain containing 3A	55210	HGNC:25567|MIM:612316|Ensembl:ENSG00000197785|HPRD:12500|Vega:OTTHUMG00000000575	-	NM_001170535	GCATGCCCCGATCTTTCACACACTGGTGACCCTGAGAGAGGAGGGAGGAG	chr1	1447522	1470067	+	N	N	N	N	II1	e0	-4.33	-5.71	-1.38	0.28331	0.215373	0.150345	0.113621	0.271202	0.542814	9.04336	9.32667	9.25873	9.1937
TMEM240	transmembrane protein 240	339453	HGNC:25186	C1orf70	NM_001114748	GATCCCGTACGACGGGGACCAGTCGGTGGTGGACGCCTCCGAGAACTACT	chr1	1470157	1475740	-	N	N	N	N	II1	e0	-1.48	-2.47	-0.99	0.124953	0.0744665	0.0233749	0.145405	0.478008	0.896017	6.7595	6.88446	6.83397	6.78288
SSU72	SSU72 RNA polymerase II CTD phosphatase homolog (S. cerevisiae)	29101	HGNC:25016|Ensembl:ENSG00000160075|HPRD:13712|Vega:OTTHUMG00000000576	HSPC182|PNAS-120	NM_014188	GTTTGTGTGCACTTCCCGACATACCTGTGTCTTCGTGTGCCTGCCTTCCC	chr1	1477052	1510262	-	N	N	N	N	II1	e0	-7.09	-7.58	-0.49	0.305944	0.253949	0.269221	0.0701925	0.150685	0.138237	11.2972	11.6031	11.5511	11.5664
C1orf233	chromosome 1 open reading frame 233	643988	HGNC:42951|Ensembl:ENSG00000228594|Vega:OTTHUMG00000154864	-	NM_001242659	CCGCTCCCTGCGCGCCAGCGTCCTGCGCAACCGCAGCGTCCTCCTGCAGT	chr1	1533387	1535476	-	N	N	N	N	II1	e0	-7.89	3.27	11.16	-0.0297584	0.0433752	-0.0778819	0.880115	0.802883	0.620632	6.85663	6.82687	6.9	6.77874
MIB2	mindbomb E3 ubiquitin protein ligase 2	142678	HGNC:30577|MIM:611141|Ensembl:ENSG00000197530|HPRD:15905|Vega:OTTHUMG00000074647	ZZANK1|ZZZ5	NM_001170687	ATGGAGGAACGCATCACCTGCCCCATCTGCATCGACAGCCACATCCGCCT	chr1	1550794	1565990	+	N	N	N	N	II1	e0	-9.08	-3.35	5.73	-0.168918	-0.182953	-0.244156	0.297972	0.250037	0.108749	8.52964	8.36073	8.34669	8.28549
MMP23B	matrix metallopeptidase 23B	8510	HGNC:7171|MIM:603321|Ensembl:ENSG00000189409|HPRD:04503|Vega:OTTHUMG00000074713	MIFR|MIFR-1|MMP22|MMP23A	NM_006983	CCGTGTGCGGGGCTGAGCCCGGCTGATAAAGCACTTTCTCTCTGAAAAAA	chr1	1567559	1570030	+	N	N	N	N	II1	e0	-4.53	-2.86	1.67	0.212303	0.157009	0.0148628	0.230775	0.434627	0.970234	7.20938	7.42168	7.36639	7.22424
MMP23A	matrix metallopeptidase 23A (pseudogene)	8511	HGNC:7170|MIM:603320|Ensembl:ENSG00000215914|HPRD:04502	MIFR|MIFR-1|MMP21	NR_002946	CCCACCGCCCCCCAGGACCAAAACCAGGCTGGTGCCCGAGGGCAGGAACG	chr1	1568158	1570027	+	N	N	N	N	II1	e0	-6.39	-6.4	-0.01	0.0372767	0.0789892	0.0457356	0.909926	0.763874	0.898347	6.81267	6.84994	6.89166	6.8584
CDK11B	cyclin-dependent kinase 11B	984	HGNC:1729|MIM:176873|Ensembl:ENSG00000248333|HPRD:08909	CDC2L1|CDK11|CDK11-p110|CDK11-p46|CDK11-p58|CLK-1|PK58|p58|p58CDC2L1|p58CLK-1	NM_033489	GCTAGAGTGAAAGAAAAAGAAAGAGAGCACGAACGTCGGAAACGACATCG	chr1	1571099	1655775	-	N	N	N	N	II1	e0	-7.86	-7.07	0.79	-0.0993574	-0.102618	-0.141635	0.613309	0.603069	0.446804	6.85402	6.75466	6.7514	6.71238
SLC35E2B	solute carrier family 35, member E2B	728661	HGNC:33941|Ensembl:ENSG00000189339|Vega:OTTHUMG00000078639	SLC35E2	NM_001290264	AGCAAACGGTTCTGTTAATTAGCGAGTCACTGTTGATTCTGCTGTGGTGG	chr1	1592938	1624243	-	N	N	N	N	II1	e2	-8.51	-7.37	1.14	-0.514324	-0.24819	-0.116286	0.00508737	0.201122	0.691337	11.2821	10.7678	11.034	11.1659
CDK11A	cyclin-dependent kinase 11A	728642	HGNC:1730|MIM:116951|Ensembl:ENSG00000008128|Vega:OTTHUMG00000000703	CDC2L2|CDC2L3|CDK11-p110|CDK11-p46|CDK11-p58|PITSLRE|p58GTA	NM_033529	AGGGACCGCTTGGAGCAGTTAGAAAGGAAGCGGGAGCGGGAGCGCAAGAT	chr1	1634169	1655791	-	N	N	N	N	II1	e0	-8.22	-7.29	0.93	0.217773	0.204532	0.190519	0.179132	0.219939	0.294551	7.95256	8.17033	8.15709	8.14307
SLC35E2	solute carrier family 35, member E2	9906	HGNC:20863|Ensembl:ENSG00000215790|HPRD:15374|Vega:OTTHUMG00000000823	-	NM_182838	TCACGGCGTACGCCCTCATGGGGAAAATCTCCCCGGTGACTTTCAGGTCC	chr1	1658823	1677438	-	N	N	N	N	II1	e0	-8.99	-6.5	2.49	-0.243586	-0.0375368	-0.084314	0.0612265	0.874651	0.689907	7.11359	6.87	7.07605	7.02927
NADK	NAD kinase	65220	HGNC:29831|MIM:611616|Ensembl:ENSG00000008130|HPRD:16907|Vega:OTTHUMG00000000942	dJ283E3.1	NM_001198995	ATAAGGAAGGCACAAGACGTTCTCCTCTGCCCGTGAGGAGCTTCCCGCAG	chr1	1682670	1690081	-	N	N	N	N	II1	e0	-4.4	-5.49	-1.09	-0.0484621	-0.0559119	-0.00669407	0.858759	0.825867	0.985922	7.98903	7.94057	7.93312	7.98234
GNB1	guanine nucleotide binding protein (G protein), beta polypeptide 1	2782	HGNC:4396|MIM:139380|Ensembl:ENSG00000078369|HPRD:00766|Vega:OTTHUMG00000000940	-	NM_001282539	TTCCGTCCAACAACTCTGTAGAGCTCTCTGCACCCTTACCCCTTTCCACC	chr1	1716723	1822556	-	N	N	N	N	II1	e0	-5.45	-4.86	0.59	0.00762953	-0.0765709	-0.0545471	0.978448	0.706849	0.835705	12.008	12.0156	11.9314	11.9535
CALML6	calmodulin-like 6	163688	HGNC:24193|MIM:610171|Ensembl:ENSG00000169885|HPRD:12997|Vega:OTTHUMG00000000943	CAGLP	NM_138705	GGAGCAGATGATGAAGGAGGCCGACAAGGATGGGGACAGGACCATCGACT	chr1	1846265	1848733	+	N	N	N	N	II1	e0	-8.87	-3.19	5.68	0.12578	0.113785	0.147168	0.386313	0.456237	0.317587	6.66833	6.79411	6.78211	6.81549
TMEM52	transmembrane protein 52	339456	HGNC:27916|Ensembl:ENSG00000178821|HPRD:14166|Vega:OTTHUMG00000000944	-	NM_178545	AGTCGGGCCCCAATACTCAACTACCACCTTGTAGCCCTGGTGCCCCTTGA	chr1	1849028	1850740	-	N	N	N	N	II1	e0	-3.73	-0.8	2.93	-0.140661	-0.145077	-0.253134	0.202264	0.18786	0.0157026	7.0138	6.87314	6.86872	6.76067
KIAA1751	KIAA1751	85452	HGNC:29368	-	NM_001080484	TGACCATCCAGGCACAGTGGCTCATGCCTGTAATCCCAGAACTTTGGGAG	chr1	1884751	1935276	-	N	N	N	N	II1	e0	-5.93	-5.87	0.06	-0.0303842	-0.246302	-0.0729837	0.934624	0.213174	0.839009	10.1424	10.112	9.89607	10.0694
GABRD	gamma-aminobutyric acid (GABA) A receptor, delta	2563	HGNC:4084|MIM:137163|Ensembl:ENSG00000187730|HPRD:08842|Vega:OTTHUMG00000041064	EIG10|EJM7|GEFSP5	NM_000815	CAGGCAGCCCGAGACCTGCACAGATGAAGGAGCAGAGGTTCTGACCGAGA	chr1	1950767	1962192	+	N	N	N	N	II1	e0	-8.93	-5.53	3.4	0.0198741	0.0477828	0.0236323	0.936596	0.818614	0.932715	6.61309	6.63297	6.66087	6.63672
PRKCZ	protein kinase C, zeta	5590	HGNC:9412|MIM:176982|Ensembl:ENSG00000067606|HPRD:01504|Vega:OTTHUMG00000001238	PKC-ZETA|PKC2	NM_002744	TCCACGGAAACAGAACTCGATGCACTGACCTGCTCCGCCAGGAAAGTGAG	chr1	1981908	2116834	+	N	N	N	N	II1	e0	-6.64	-6.04	0.6	-0.139218	0.0182927	0.213758	0.190241	0.92737	0.0356191	7.01798	6.87876	7.03627	7.23174
C1orf86	chromosome 1 open reading frame 86	199990	HGNC:26428|MIM:615183|Ensembl:ENSG00000162585|HPRD:08707|Vega:OTTHUMG00000001404	FAAP20|FP7162	NM_001282670	GAGAAGGGCCAGCTCCGCGCGGGCATCATCCCTACCAGATTGAGTGTTTT	chr1	2120987	2144159	-	N	N	N	N	II1	e0	-4.27	-6.24	-1.97	0.171433	0.390119	0.402651	0.642476	0.14878	0.150922	8.62351	8.79495	9.01363	9.02616
SKI	v-ski avian sarcoma viral oncogene homolog	6497	HGNC:10896|MIM:164780|Ensembl:ENSG00000157933|HPRD:01271|Vega:OTTHUMG00000001407	SGS|SKV	NM_003036	CGGGGGTCGTTCTGTGCCTTCCAGCATCTTGTACAGCAAATCCTGACTCG	chr1	2160133	2241652	+	N	N	N	N	II1	e0	-7.52	-6.12	1.4	-0.0141602	-0.0783975	-0.107262	0.953267	0.635507	0.492612	7.21697	7.20281	7.13857	7.10971
MORN1	MORN repeat containing 1	79906	HGNC:25852|Ensembl:ENSG00000116151|HPRD:07843|Vega:OTTHUMG00000001402	-	NM_024848	TGGCCAGCCACCCCATGTCCTGGAAGAAGGCCCTGAAGCCTCAAGCAGCT	chr1	2252695	2322993	-	N	N	N	N	II1	e0	-6.46	-5.59	0.87	-0.0343371	-0.0222314	-0.0071301	0.838941	0.900954	0.975321	6.64773	6.6134	6.6255	6.6406
LOC100129534	small nuclear ribonucleoprotein polypeptide N pseudogene	100129534	-	-	NR_024489	GTCCCAGGCATCTTTCCTCCCAGACCCGAGAGCAGCCAGAAACAAACCCT	chr1	2281852	2284100	-	N	N	N	N	II1	e0	-9.78	-5.96	3.82	-0.042756	0.0485773	0.0302689	0.851017	0.818842	0.913602	6.81317	6.77041	6.86174	6.84344
RER1	RER1 retention in endoplasmic reticulum 1 homolog (S. cerevisiae)	11079	HGNC:30309|Ensembl:ENSG00000157916|HPRD:17967|Vega:OTTHUMG00000001403	-	NM_007033	TTTCTCACGGATGGAATTCTAGTCAGCTGCAGGCGGGAAGCCAGGCGGGT	chr1	2323213	2336885	+	N	N	N	N	II1	e0	-4.54	-5.06	-0.52	0.262722	0.218629	0.32523	0.1857	0.30505	0.0983579	8.08128	8.34401	8.29991	8.40651
PEX10	peroxisomal biogenesis factor 10	5192	HGNC:8851|MIM:602859|Ensembl:ENSG00000157911|HPRD:04175|Vega:OTTHUMG00000001637	NALD|PBD6A|PBD6B|RNF69	NM_002617	CTGGGAGGGGCGCCTGAACCCAGAACATTTCCCTAACCCCAACCTGGTAG	chr1	2336240	2344010	-	N	N	N	N	II1	e0	-6.17	-6.06	0.11	0.0262028	-0.101829	-0.0521521	0.917239	0.547998	0.832378	7.21281	7.23902	7.11098	7.16066
PLCH2	phospholipase C, eta 2	9651	HGNC:29037|MIM:612836|Ensembl:ENSG00000149527|Vega:OTTHUMG00000000719	PLC-eta2|PLCL4|PLCeta2	NM_014638	CTTCGAGGCTGGCCCTGCCAGGCAGTTTTCCCGGCGTTTTAGGATCTGTA	chr1	2407753	2436964	+	N	N	N	N	II1	e0	-6.52	-6.52	0	0.283979	-0.0046196	-0.0271486	0.0120192	0.984029	0.914218	6.84149	7.12546	6.83687	6.81434
PANK4	pantothenate kinase 4	55229	HGNC:19366|MIM:606162|Ensembl:ENSG00000157881|HPRD:07313|Vega:OTTHUMG00000000791	-	NM_018216	TCTTCAGCGTCATCTTCAAGTACGAGGTCCCAGCCGAGTGAGGCGCTGCA	chr1	2439974	2458035	-	N	N	N	N	II1	e0	-5.9	-7.41	-1.51	-0.0195969	-0.197999	-0.142805	0.941714	0.148178	0.387928	7.75423	7.73463	7.55623	7.61142
HES5	hairy and enhancer of split 5 (Drosophila)	388585	HGNC:19764|MIM:607348|Ensembl:ENSG00000197921|HPRD:16240|Vega:OTTHUMG00000000793	bHLHb38	NM_001010926	GGATTCCTCTGTGTGGGTGGATGCGTGTGGGCACGACTTTGTACTCAGAA	chr1	2460183	2461684	-	N	N	N	N	II1	e0	0	-2.76	-2.76	0.0562012	0.0584039	0.0435226	0.770452	0.755849	0.856959	6.75313	6.80933	6.81154	6.79665
LOC100133445	uncharacterized LOC100133445	100133445	-	-	NR_037844	ATCGATAAACGCACATGCGAGGTGGAGGGTGGCTGGTGTGGAATGTGCCC	chr1	2487207	2488450	-	N	N	N	N	II1	e0	-1.34	-6	-4.66	0.015491	0.145063	0.0745805	0.937626	0.155994	0.609101	6.69631	6.7118	6.84137	6.77089
TNFRSF14	tumor necrosis factor receptor superfamily, member 14	8764	HGNC:11912|MIM:602746|Ensembl:ENSG00000157873|HPRD:04122|Vega:OTTHUMG00000000792	ATAR|CD270|HVEA|HVEM|LIGHTR|TR2	NM_003820	AGCCAAGGCTGGACTGGGTTGGCTGCAGTGTGGTGTTTAGTGGATACCAC	chr1	2487804	2495267	+	N	N	N	N	II1	e0	-4.38	-4.67	-0.29	0.346	0.455411	0.475042	0.312998	0.149589	0.145784	9.178	9.524	9.63341	9.65304
FAM213B	family with sequence similarity 213, member B	127281	HGNC:28390|Ensembl:ENSG00000157870|HPRD:14513|Vega:OTTHUMG00000000847	C1orf93	NR_036638	GATAAACCCCCATCTGACCAGAAACATGCCAATCCTGAGAATAACCTCCC	chr1	2517898	2522908	+	N	N	N	N	II1	e0	-4.82	-2.2	2.62	-0.299084	-0.294559	-0.300181	0.00911848	0.0106461	0.0103776	7.40282	7.10374	7.10826	7.10264
MMEL1	membrane metallo-endopeptidase-like 1	79258	HGNC:14668|Ensembl:ENSG00000142606|HPRD:07024|Vega:OTTHUMG00000000846	MMEL2|NEP2|NEPII|NL1|NL2|SEP	NM_033467	TTCTTCATCAACTATGCCCAGGTGTGGTGCGGGTCCTACCGGCCCGAGTT	chr1	2522080	2564481	-	N	N	N	N	II1	e0	-6.38	-5.63	0.75	-0.105322	-0.0703426	-0.0437628	0.446544	0.669197	0.843466	6.77521	6.66989	6.70487	6.73145
ACTRT2	actin-related protein T2	140625	HGNC:24026|MIM:608535|Ensembl:ENSG00000169717|HPRD:12254|Vega:OTTHUMG00000000562	ARPM2|ARPT2|Arp-T2|HARPM2	NM_080431	CCATCAAGATCACGGCTCCCCCCGACCGGTGGTTCTCCACCTGGATTGGA	chr1	2938045	2939467	+	N	N	N	N	II1	e0	-5.87	-7.47	-1.6	-0.0505025	0.0154813	-0.0635787	0.733982	0.937122	0.675223	6.84335	6.79285	6.85883	6.77977
LINC00982	long intergenic non-protein coding RNA 982	440556	HGNC:48664|Ensembl:ENSG00000177133	-	NR_024371	TAGAGGCAGAAGCAGGACTCAGAGGAAGAGCACCCTGACCACAAAGCCCC	chr1	2980635	2984289	-	N	N	N	N	II1	e0	-5.73	-5.24	0.49	-0.0290646	-0.0865055	-0.0836434	0.876786	0.503243	0.558121	6.8885	6.85944	6.802	6.80486
PRDM16	PR domain containing 16	63976	HGNC:14000|MIM:605557|Ensembl:ENSG00000142611|HPRD:16122|Vega:OTTHUMG00000000581	CMD1LL|LVNC8|MEL1|PFM13	NM_022114	ATATGCAATGATGCTGTCCCTTTCCGAAGACACTCCTCTCCACACCCCCT	chr1	2985741	3355185	+	N	N	N	N	II1	e0	-5.65	-4.88	0.77	-0.0365859	-0.0912712	-0.0470114	0.863505	0.555316	0.833719	6.77516	6.73858	6.68389	6.72815
ARHGEF16	Rho guanine nucleotide exchange factor (GEF) 16	27237	HGNC:15515|Ensembl:ENSG00000130762|HPRD:12478|Vega:OTTHUMG00000000625	GEF16|NBR	NM_014448	GCCGGAGGGAGGGGACCCGGCAGGGAGATTTCGGTTTTGAGGTTTCTAAA	chr1	3371146	3397677	+	N	N	N	N	II1	e0	-7.22	-4.38	2.84	0.0362518	-0.223224	-0.0938809	0.871372	0.0637612	0.594122	6.92428	6.96053	6.70106	6.8304
MEGF6	multiple EGF-like-domains 6	1953	HGNC:3232|MIM:604266|HPRD:11973	EGFL3	NM_001409	CCCGCTCAGTGAAGACACAGTGTTCAGCTACGGAAGCCATAAGGCAGGCC	chr1	3404505	3528059	-	N	N	N	N	II1	e0	-5.83	-4.54	1.29	-0.0458949	-0.0355728	-0.0718963	0.800901	0.851333	0.675032	6.78041	6.73452	6.74484	6.70851
MIR551A	microRNA 551a	693135	HGNC:32806|MIM:615148|miRBase:MI0003556	MIRN551A	NR_030277	TCTGACCGTTTCTAGGCGACCCACTCTTGGTTTCCAGGGTTGCCCTGGAA	chr1	3477259	3477354	-	N	N	N	N	II1	e0	-5.78	-4.97	0.81	0.031829	0.0144092	0.0316346	0.855721	0.942104	0.876352	6.77113	6.80295	6.78553	6.80276
TPRG1L	tumor protein p63 regulated 1-like	127262	HGNC:27007|MIM:611460|Ensembl:ENSG00000158109|HPRD:14037|Vega:OTTHUMG00000000609	FAM79A|RP11-46F15.3|h-mover|mover	NM_182752	TGCAGGGCTGCCTCAGAAGCTGGCTGGGGACTCTAGCCTCTGTGTTCATA	chr1	3541555	3546694	+	N	N	N	N	II1	e0	-6.35	-5.06	1.29	0.0796015	0.300098	0.114379	0.770685	0.0777319	0.66621	8.67619	8.75579	8.97629	8.79057
WRAP73	WD repeat containing, antisense to TP73	49856	HGNC:12759|MIM:606040|Ensembl:ENSG00000116213|HPRD:06918|Vega:OTTHUMG00000000612	WDR8	NM_017818	CTTTGCAGTGCTCTCTCTGTGCTGGCATTTAAGCGGAGACTCGATGGCCC	chr1	3547330	3566671	-	N	N	N	N	II1	e0	-7.19	-5.63	1.56	-0.000161208	0.0160327	-0.03168	0.999057	0.95679	0.920104	9.67803	9.67787	9.69406	9.64635
TP73	tumor protein p73	7161	HGNC:12003|MIM:601990|Ensembl:ENSG00000078900|HPRD:03587|Vega:OTTHUMG00000000610	P73	NM_001204185	TTCGACCTGCCCGACTGCAAGGCCCGCAAGCAGCCCATCAAGGAGGAGTT	chr1	3569128	3652765	+	N	N	N	N	II1	e0	-6.74	-5.42	1.32	-0.0469261	-0.10832	0.0138283	0.8363	0.517492	0.964446	6.64434	6.59742	6.53602	6.65817
TP73-AS1	TP73 antisense RNA 1	57212	HGNC:29052|Ensembl:ENSG00000227372|HPRD:13803	KIAA0495|PDAM	NR_033708	CTTTTGGAAACGGGCTTTCTCCTTTCCATTTTGCAGCCGGGGGCGGGTGG	chr1	3652547	3663937	-	N	N	N	N	II1	e0	-7.28	-6.42	0.86	0.233628	0.0732685	-0.0640315	0.269888	0.820821	0.872354	7.82097	8.05459	7.89423	7.75693
CCDC27	coiled-coil domain containing 27	148870	HGNC:26546|Ensembl:ENSG00000162592|HPRD:08141|Vega:OTTHUMG00000003504	-	NM_152492	AGGCCTTCCTGACCAGCAAATCCAAGAAGGGGACCTCCAAGTAGGCCCAG	chr1	3668964	3688209	+	N	N	N	N	II1	e0	-5.53	-6.82	-1.29	-0.131633	0.00218836	-0.0823249	0.205392	0.990647	0.549835	7.02143	6.8898	7.02362	6.93911
SMIM1	small integral membrane protein 1	388588	HGNC:44204|MIM:615242|Ensembl:ENSG00000235169|Vega:OTTHUMG00000003505	Vel	NM_001288583	GGCGTGGCCCTCTTCTGGATCATCTTCATCCTGGGCTACCTCACAGGCTA	chr1	3689324	3692546	+	N	N	N	N	II1	e0	-6.85	-6.28	0.57	-0.19901	0.100617	0.112073	0.137246	0.567992	0.538596	7.33018	7.13117	7.43079	7.44225
LRRC47	leucine rich repeat containing 47	57470	HGNC:29207|Ensembl:ENSG00000130764|HPRD:13837|Vega:OTTHUMG00000003506	-	NM_020710	CTGTACAGTCATGTGCCACGTAACAGCGTCTGGGTCAGTGACGGACACTT	chr1	3696783	3713068	-	N	N	N	N	II1	e0	-6.09	-7.02	-0.93	0.391276	0.359712	0.208597	0.172247	0.225562	0.608863	9.14954	9.54082	9.50926	9.35814
CEP104	centrosomal protein 104kDa	9731	HGNC:24866|Ensembl:ENSG00000116198|HPRD:11091|Vega:OTTHUMG00000003507	GlyBP|KIAA0562	NM_014704	CCTTTTGCACATCGGTCTCTGCCACACGCAGTAGAATTTCCGCAGGGCTG	chr1	3728644	3773797	-	N	N	N	N	II1	e0	-4.95	-4.48	0.47	-0.0761962	0.190062	-0.0314871	0.522501	0.0389717	0.869294	7.9335	7.85731	8.12356	7.90202
DFFB	DNA fragmentation factor, 40kDa, beta polypeptide (caspase-activated DNase)	1677	HGNC:2773|MIM:601883|Ensembl:ENSG00000169598|HPRD:03532|Vega:OTTHUMG00000003525	CAD|CPAN|DFF-40|DFF2|DFF40	NM_001282669	GGGCATCGGCAGCTGAACCCTGCTCCGTTGGTCAGCGTTACTATCATCTC	chr1	3773830	3801993	+	N	N	N	N	II1	e0	-6.44	-8.24	-1.8	-0.0671468	0.161829	-0.0350869	0.866978	0.584818	0.944622	8.23477	8.16763	8.3966	8.19969
C1orf174	chromosome 1 open reading frame 174	339448	HGNC:27915|Ensembl:ENSG00000198912|HPRD:17353|Vega:OTTHUMG00000003739	RP13-531C17.2	NM_207356	TATACACGTACATACATGATGATGGCTTGAGTCAGCTGCAGGGCAGTGGG	chr1	3805696	3816857	-	N	N	N	N	II1	e0	-5.88	-6.51	-0.63	-0.212079	-0.24955	-0.196706	0.123423	0.0645708	0.185205	9.83923	9.62715	9.58968	9.64252
LINC01134	uncharacterized LOC100133612	100133612	Ensembl:ENSG00000236423	-	NR_024455	CCAGTGCCCAGTGAAGTGTGGGGGGCTGGACATAGGTGGCCTCAGTTCCT	chr1	3816967	3832011	+	N	N	N	N	II1	e0	-7.88	-5.26	2.62	-0.0520449	-0.103706	-0.0881458	0.883533	0.716404	0.800178	6.86884	6.8168	6.76514	6.7807
RP13-614K11.1	uncharacterized LOC728716	728716	-	-	NR_040065	TTCCTGGACTCGACCCTGGACTCCTCCAGAGAATCGAGAGCCCATCCTGA	chr1	4000671	4012643	+	N	N	N	N	II1	e0	-1.49	-2.76	-1.27	-0.081297	0.0679835	-0.0569223	0.580922	0.670776	0.770716	6.72224	6.64094	6.79022	6.66532
AJAP1	adherens junctions associated protein 1	55966	HGNC:30801|MIM:610972|Ensembl:ENSG00000196581|HPRD:15339|Vega:OTTHUMG00000000645	MOT8|RP3-426F10.1|SHREW-1|SHREW1	NM_001042478	GTACACCGATGAGACGCTGCACTCGACGACGGGGGAGTACAAATCCACAT	chr1	4715104	4837854	+	Y	Y	Y	N	PI1	e0	0.58	0.5	-0.08	0.156402	0.0934711	0.203552	0.286012	0.610807	0.151943	6.91508	7.07148	7.00855	7.11863
NPHP4	nephronophthisis 4	261734	HGNC:19104|MIM:607215|Ensembl:ENSG00000131697|HPRD:06238|Vega:OTTHUMG00000000701	POC10|SLSN4	NM_015102	GAGGCATTTTGCGTGAAGGTCATCTACCAGTGAGGGCTTGAGGGTGACGT	chr1	5922869	6052533	-	N	N	N	N	II1	e0	-6.6	-6.62	-0.02	-0.309757	-0.378199	-0.308793	0.0397135	0.0132552	0.0465096	8.23298	7.92323	7.85478	7.92419
KCNAB2	potassium voltage-gated channel, shaker-related subfamily, beta member 2	8514	HGNC:6229|MIM:601142|Ensembl:ENSG00000069424|HPRD:03090|Vega:OTTHUMG00000000795	AKR6A5|HKvbeta2|HKvbeta2.1|HKvbeta2.2|KCNA2B|KV-BETA-2	NM_001199860	CAAGGGATGCCAGTAAGTCTGCAGGTGCGGGGTGCCACCTACAGGCCCAG	chr1	6094347	6161253	+	N	N	N	N	II1	e0	-9.13	-7.88	1.25	-0.186304	-0.186398	-0.162223	0.439235	0.442557	0.564718	7.36255	7.17625	7.17615	7.20033
CHD5	chromodomain helicase DNA binding protein 5	26038	HGNC:16816|MIM:610771|Ensembl:ENSG00000116254|HPRD:10828|Vega:OTTHUMG00000000952	CHD-5	NM_015557	GCCCACGGGAGGCTGGACAGAGGCTGTAGCCAACACAATCACCTTTACTT	chr1	6161846	6240194	-	N	N	N	N	II1	e0	-6.51	-6.39	0.12	0.151097	0.135775	0.140936	0.452478	0.525243	0.536609	6.8574	7.00849	6.99317	6.99833
RPL22	ribosomal protein L22	6146	HGNC:10315|MIM:180474|Ensembl:ENSG00000116251|HPRD:01602|Vega:OTTHUMG00000000953	EAP|HBP15|HBP15/L22|L22	NM_000983	CTGCGAGTTGCATAGCTGGAAGTTCAATGCTCAGTCCTACCTTGGCTCCC	chr1	6245079	6259679	-	N	N	N	N	II1	e0	-7.74	-7.53	0.21	-0.275447	-0.29713	-0.403137	0.00352441	0.00207393	0.000175521	11.2726	10.9971	10.9754	10.8694
RNF207	ring finger protein 207	388591	HGNC:32947|Ensembl:ENSG00000158286|HPRD:08119|HPRD:13536|Vega:OTTHUMG00000001089	C1orf188	NM_207396	TCACTCACATTGACGTCCACTGTCCCTGCACCTGCTACTTCAGGGGCACT	chr1	6266188	6281359	+	N	N	N	N	II1	e0	-4.87	-4.25	0.62	-0.144713	-0.0950034	0.00296807	0.30393	0.576888	0.992247	6.89662	6.7519	6.80161	6.89958
ICMT	isoprenylcysteine carboxyl methyltransferase	23463	HGNC:5350|MIM:605851|Ensembl:ENSG00000116237|HPRD:09321|Vega:OTTHUMG00000001254	HSTE14|MST098|MSTP098|PCCMT|PCMT|PPMT	NM_012405	CCTCGGCCTCTCTGTCATGCTGGGAAGTGCCTACTCTCTGGGCCACTGCT	chr1	6281252	6296044	-	N	N	N	N	II1	e0	-6.83	-7.26	-0.43	-0.478258	-0.21386	-0.0844499	0.000901965	0.120633	0.69839	9.26889	8.79063	9.05503	9.18444
LINC00337	long intergenic non-protein coding RNA 337	148645	HGNC:28620|HPRD:17550	C1orf211|NCRNA00337	NR_103534	TCAGAAGTTGCTGGAGTTGCCGAATCTGTCAGGGCCCAGGGTTCCCAGAG	chr1	6296299	6299502	+	N	N	N	N	II1	e0	-8.27	-6.66	1.61	0.0184814	-0.20413	0.0308637	0.952827	0.202365	0.92622	7.18759	7.20607	6.98346	7.21845
HES3	hairy and enhancer of split 3 (Drosophila)	390992	HGNC:26226|MIM:609971|Ensembl:ENSG00000173673|HPRD:18618|Vega:OTTHUMG00000001271	bHLHb43	NM_001024598	TCTGCGCGTCTGGGCATAATCCACCCCCACTCTAGCTCCACCTACACACG	chr1	6304251	6305638	+	N	N	N	N	II1	e0	-3.92	-0.82	3.1	-0.076313	-0.136863	-0.135366	0.671413	0.335269	0.380622	6.86753	6.79122	6.73067	6.73216
GPR153	G protein-coupled receptor 153	387509	HGNC:23618|MIM:614269|Ensembl:ENSG00000158292|HPRD:13600|Vega:OTTHUMG00000001272	PGR1	NM_207370	CATTGGCCTCCCCAGGGGCTTTCCACCCACACTGCACCATAACCGCCACA	chr1	6307405	6321035	-	N	N	N	N	II1	e0	-7.54	-5.25	2.29	-0.0438042	-0.0623757	-0.0707536	0.748503	0.603203	0.568103	7.02317	6.97937	6.9608	6.95242
ACOT7	acyl-CoA thioesterase 7	11332	HGNC:24157|MIM:602587|Ensembl:ENSG00000097021|HPRD:12517|Vega:OTTHUMG00000001295	ACH1|ACT|BACH|CTE-II|LACH|LACH1|RP1-120G22.10|hBACH	NM_007274	ATGGAGATCGAGGTGTTGGTGGACGCCGACCCTGTTGTGGACAGCTCTCA	chr1	6324331	6453826	-	N	N	N	N	II1	e0	-6.05	-6.54	-0.49	-0.408271	-0.328876	-0.176424	0.0118998	0.0436631	0.392781	10.6789	10.2706	10.35	10.5025
HES2	hairy and enhancer of split 2 (Drosophila)	54626	HGNC:16005|MIM:609970|Ensembl:ENSG00000069812|HPRD:13649|Vega:OTTHUMG00000000752	bHLHb40	NM_019089	TTCAGTGACCTAAGGACAGCCAGAGCACTAAGCTGCTGGGAACCCATCTG	chr1	6475293	6479979	-	N	N	N	N	II1	e0	-6.96	-6.83	0.13	-0.0977748	-0.123859	-0.152172	0.476007	0.323138	0.215454	6.81519	6.71742	6.69133	6.66302
ESPN	espin	83715	HGNC:13281|MIM:606351|Ensembl:ENSG00000187017|HPRD:06962|Vega:OTTHUMG00000000753	DFNB36	NM_031475	TGACCCTGTGTCTCCAACTGCTGCACCCCATCCCGACCCTGTCTCCGCCA	chr1	6484847	6521004	+	N	N	N	N	II1	e0	-7.01	-6.35	0.66	-0.0721588	-0.0120711	-0.106913	0.700503	0.964232	0.543986	6.784	6.71184	6.77192	6.67708
TNFRSF25	tumor necrosis factor receptor superfamily, member 25	8718	HGNC:11910|MIM:603366|Ensembl:ENSG00000215788|HPRD:04532|Vega:OTTHUMG00000000831	APO-3|DDR3|DR3|LARD|TNFRSF12|TR3|TRAMP|WSL-1|WSL-LR	NM_148965	CACCTAGGCGCTCTGGTGGCCCTTGCAGAAGCCCTAAGTACGGTTACTTA	chr1	6521213	6526255	-	N	N	N	N	II1	e0	-6.99	-5.24	1.75	-0.113116	0.0147476	0.0320604	0.387833	0.949549	0.892138	6.97147	6.85836	6.98622	7.00353
PLEKHG5	pleckstrin homology domain containing, family G (with RhoGef domain) member 5	57449	HGNC:29105|MIM:611101|Ensembl:ENSG00000171680|HPRD:11104|Vega:OTTHUMG00000000905	CMTRIC|DSMA4|GEF720|Syx|Tech	NM_001042665	TGCCACCAGACCAACACCCCCAGACTTCCCCACCTTCAGCCACCATCAGA	chr1	6526151	6546014	-	N	N	N	N	II1	e0	-7.63	-8.14	-0.51	-0.0894071	-0.0587841	0.0504473	0.514856	0.719631	0.799666	6.80068	6.71127	6.7419	6.85113
NOL9	nucleolar protein 9	79707	HGNC:26265|Ensembl:ENSG00000162408|HPRD:08667|Vega:OTTHUMG00000000904	Grc3|NET6	NM_024654	CTGCAGGATCTCAAGCATAATGGATACAAGGGCTCGCCACGGGCCTTGCC	chr1	6581406	6614658	-	N	N	N	N	II1	e0	-4.89	-4.57	0.32	0.179496	-0.014287	0.117239	0.28239	0.964526	0.594421	7.257	7.4365	7.24272	7.37424
TAS1R1	taste receptor, type 1, member 1	80835	HGNC:14448|MIM:606225|Ensembl:ENSG00000173662|HPRD:06939|Vega:OTTHUMG00000001441	GPR70|T1R1|TR1	NM_177540	GCCTAGACCAGGCTCCGGGCTGCCAATAAAGAAGTGAAATGCGTAAAAAA	chr1	6615337	6639817	+	N	N	N	N	II1	e0	-3.7	-4.4	-0.7	-0.0173976	-0.0629764	-0.0749549	0.917426	0.589401	0.522848	6.64496	6.62756	6.58198	6.57001
ZBTB48	zinc finger and BTB domain containing 48	3104	HGNC:4930|MIM:165270|Ensembl:ENSG00000204859|HPRD:01316|Vega:OTTHUMG00000001438	HKR3|ZNF855|pp9964	NM_001278648	AGCCCACTTGGCCCCACCCCTCAATAAACCGTGTGGCTTTGGACTCTCGT	chr1	6640050	6649340	+	N	N	N	N	II1	e1	-8.66	-7.14	1.52	0.471733	0.645875	0.311106	0.0408825	0.00640028	0.244718	8.58919	9.06092	9.23506	8.90029
KLHL21	kelch-like family member 21	9903	HGNC:29041|Ensembl:ENSG00000162413|HPRD:17239|Vega:OTTHUMG00000001437	-	NM_014851	AAAACCAGGCACCAGCCTCTGCAGCAATGGGTCCCTCTAGCCTGTGGACA	chr1	6650783	6662929	-	N	N	N	N	II1	e0	-7.42	-4.95	2.47	-0.060691	-0.0388766	0.0276938	0.824551	0.894928	0.939248	7.73464	7.67395	7.69577	7.76234
PHF13	PHD finger protein 13	148479	HGNC:22983|Ensembl:ENSG00000116273|HPRD:10150|Vega:OTTHUMG00000001439	PHF5|SPOC1	NM_153812	TAGGCACGACCCATCTGTGGTTCCTGGTTGGTGGCTAATGAAGTGAGGGG	chr1	6673755	6684093	+	N	N	N	N	II1	e0	-5.32	-4.43	0.89	-0.221148	0.040896	0.142004	0.092797	0.861121	0.386995	9.57438	9.35323	9.61528	9.71639
THAP3	THAP domain containing, apoptosis associated protein 3	90326	HGNC:20855|MIM:612532|Ensembl:ENSG00000041988|HPRD:18178|Vega:OTTHUMG00000001440	-	NM_001195753	AGCTTCAGTTGCCCCCAAATGCCGAAGGCCACGTAAAACAGGCAATGTTG	chr1	6684924	6693642	+	N	N	N	N	II1	e0	-7.01	-6.08	0.93	-0.0763043	0.0248444	-0.0053875	0.643251	0.910301	0.985205	7.14318	7.06688	7.16803	7.1378
DNAJC11	DnaJ (Hsp40) homolog, subfamily C, member 11	55735	HGNC:25570|MIM:614827|Ensembl:ENSG00000007923|HPRD:07112|Vega:OTTHUMG00000001443	dJ126A5.1	NM_018198	CAAGAGCAGGAAGAGCGAGAAGGTGAAGGTGATTGACGTGACTGTGCCCC	chr1	6694227	6761966	-	N	N	N	N	II1	e0	-5.65	-5.81	-0.16	0.239491	-0.0187453	0.0627838	0.114446	0.951756	0.827488	7.7647	8.00419	7.74596	7.82748
CAMTA1	calmodulin binding transcription activator 1	23261	HGNC:18806|MIM:611501|Ensembl:ENSG00000171735|HPRD:16681|Vega:OTTHUMG00000001212	CANPMR	NM_015215	ACGAACCCCTCTCTGGCTGCACGGTCGCTTATGGCAGTTCCACACAGTAG	chr1	6845383	7829766	+	N	N	N	N	II1	e0	-4.04	-3.69	0.35	-0.0817007	-0.0881488	-0.0871672	0.655175	0.624197	0.660465	6.89222	6.81052	6.80408	6.80506
VAMP3	vesicle-associated membrane protein 3	9341	HGNC:12644|MIM:603657|Ensembl:ENSG00000049245|HPRD:04711|Vega:OTTHUMG00000001225	CEB	NM_004781	ACTGTTGAAGAGATGCCTTGCGGTGTGGCCAGCTGTGAGGAGAAAGCAGC	chr1	7831328	7841492	+	N	N	N	N	II1	e0	-6.24	-9.99	-3.75	-0.201894	-0.241705	-0.0681487	0.108828	0.0507604	0.752147	8.9717	8.76981	8.73	8.90355
PER3	period circadian clock 3	8863	HGNC:8847|MIM:603427|Ensembl:ENSG00000049246|HPRD:09138|Vega:OTTHUMG00000001216	GIG13	NM_001289864	GACCGATGCCCCCCGAGGGGGCTCTCCCCAGCTTAAACTTTGTTGTTTAA	chr1	7844488	7905240	+	N	N	N	N	II1	e0	-4.69	-5.1	-0.41	-0.049845	0.0887145	0.204906	0.788885	0.555472	0.076606	6.97424	6.9244	7.06296	7.17915
UTS2	urotensin 2	10911	HGNC:12636|MIM:604097|Ensembl:ENSG00000049247|HPRD:04976|Vega:OTTHUMG00000001218	PRO1068|U-II|UCN2|UII	NM_006786	GAAGCCGTCTATCTTGTGGCGATCATGTATAAGCTGGCCTCCTGCTGTTT	chr1	7907671	7913104	-	N	N	N	N	II1	e0	0.36	-1.89	-2.25	0.130333	0.175781	0.109663	0.339823	0.15671	0.494968	6.79122	6.92155	6.967	6.90088
TNFRSF9	tumor necrosis factor receptor superfamily, member 9	3604	HGNC:11924|MIM:602250|HPRD:03767	4-1BB|CD137|CDw137|ILA	NM_001561	TCTCCATCCTCACACCTTCTGCCTTTGTCCTGCTCCCTTTTAAGCCAGGT	chr1	7975930	8003225	-	N	N	N	N	II1	e1	-4.77	-6.47	-1.7	0.216884	0.580013	0.772507	0.0321503	1.46312e-05	8.16583e-07	6.94046	7.15735	7.52048	7.71297
PARK7	parkinson protein 7	11315	HGNC:16369|MIM:602533|Ensembl:ENSG00000116288|HPRD:03961|Vega:OTTHUMG00000001210	DJ-1|DJ1	NM_007262	AATTGTTGAAGCCCTGAATGGCAAGGAGGTGGCGGCTCAAGTGAAGGCTC	chr1	8021713	8045342	+	N	N	N	N	II1	e1	-5.01	-5.64	-0.63	0.224246	0.505973	0.438089	0.168299	0.00194561	0.00626912	11.9956	12.2198	12.5016	12.4337
ERRFI1	ERBB receptor feedback inhibitor 1	54206	HGNC:18185|MIM:608069|Ensembl:ENSG00000116285|HPRD:09218|Vega:OTTHUMG00000001221	GENE-33|MIG-6|MIG6|RALT	NM_018948	GCTGTGGCTGCTTCACTTAGATGCAGTGAGACACATAGTTGGTGTTCCGA	chr1	8071778	8086393	-	N	N	N	N	II1	e1	-5.52	-6.2	-0.68	0.184213	0.273906	0.522954	0.0602555	0.00616848	2.88053e-05	7.02059	7.2048	7.29449	7.54354
SLC45A1	solute carrier family 45, member 1	50651	HGNC:17939|MIM:605763|Ensembl:ENSG00000162426|Vega:OTTHUMG00000000503	DNB5	NM_001080397	GGGCCTTGTTGGACAGGGGGACTGGCTGCCTACTGGAATGTAAATATGTG	chr1	8378144	8404227	+	N	N	N	N	II1	e0	-5.99	-4.09	1.9	-0.133497	0.000655695	-0.0121273	0.223315	0.996772	0.960392	6.96443	6.83093	6.96508	6.9523
RERE	arginine-glutamic acid dipeptide (RE) repeats	473	HGNC:9965|MIM:605226|Ensembl:ENSG00000142599|HPRD:05566|Vega:OTTHUMG00000001765	ARG|ARP|ATN1L|DNB1	NM_001042681	GCCCTGACCTTCATGGTGTCTTTGAAGCCCAACCACTCGGTTTCCTTCGG	chr1	8412463	8877699	-	N	N	N	N	II1	e0	-4.65	-4.76	-0.11	-0.396299	0.0592842	0.10388	0.00499728	0.795575	0.618815	8.39797	8.00167	8.45726	8.50185
ENO1	enolase 1, (alpha)	2023	HGNC:3350|MIM:172430|Ensembl:ENSG00000074800|HPRD:01400|Vega:OTTHUMG00000001773	ENO1L1|MPB1|NNE|PPH	NM_001428	GAACTTCTACAGAAGCCAAGCTCCCTGGAGCCCTGTTGGCAGCTCTAGCT	chr1	8921058	8939151	-	N	N	N	N	II1	e0	-8.12	-7.79	0.33	0.20305	0.331518	0.193581	0.163488	0.0173247	0.216922	13.4539	13.657	13.7854	13.6475
CA6	carbonic anhydrase VI	765	HGNC:1380|MIM:114780|Ensembl:ENSG00000131686|HPRD:00264|Vega:OTTHUMG00000001763	CA-VI|GUSTIN	NM_001215	CCCTGGGGCAGCTGTTGGGATTCTGATTAAAAGAGGGGAAACGATCATCC	chr1	9005892	9035148	+	N	N	N	N	II1	e0	-4.03	-4.39	-0.36	0.034971	-0.0829041	-0.00657271	0.903336	0.706401	0.985841	6.81272	6.84769	6.72981	6.80614
SLC2A7	solute carrier family 2 (facilitated glucose transporter), member 7	155184	HGNC:13445|MIM:610371|Ensembl:ENSG00000197241|HPRD:15365|Vega:OTTHUMG00000057499	GLUT7	NM_207420	AGCTTCCAGAGGAGAAAGAAGAAACCATTGATGCTGGGCCTCCCACAGCC	chr1	9063358	9086404	-	N	N	N	N	II1	e0	-5.14	-5.13	0.01	-0.0387414	0.0129375	-0.0519962	0.811936	0.948261	0.753907	6.69979	6.66105	6.71273	6.6478
SLC2A5	solute carrier family 2 (facilitated glucose/fructose transporter), member 5	6518	HGNC:11010|MIM:138230|Ensembl:ENSG00000142583|HPRD:00690	GLUT-5|GLUT5	NM_001135585	CTCCACTTTGCTGGTTCAGCCTTCGTGTGGCTCCTGGTAACGTGGCTCCA	chr1	9101426	9129887	-	N	N	N	N	II1	e2	-3.76	-4.72	-0.96	-0.423464	-0.837565	-0.347045	0.00364217	9.83213e-06	0.0159808	8.8308	8.40734	7.99324	8.48375
GPR157	G protein-coupled receptor 157	80045	HGNC:23687|HPRD:17068	-	NM_024980	AGGCTCCCGCGCCTTCCAAGCCAGGAGAATCTCAGGAATCCCAAGGGACC	chr1	9164475	9189229	-	N	N	N	N	II1	e0	-8.48	-6.2	2.28	0.0487208	-0.0620936	0.0188378	0.759206	0.668822	0.933417	6.7775	6.82622	6.7154	6.79633
MIR34A	microRNA 34a	407040	HGNC:31635|MIM:611172|Ensembl:ENSG00000207865|miRBase:MI0000268	MIRN34A|miRNA34A|mir-34	NR_029610	AAGGAAGCAATCAGCAAGTATACTGCCCTAGAAGTGCTGCACGTTGTGGG	chr1	9211726	9211836	-	N	N	N	N	II1	e0	-3.1	0.81	3.91	0.0607468	0.00960723	0.0682023	0.701163	0.966053	0.689389	6.73983	6.80058	6.74944	6.80803
H6PD	hexose-6-phosphate dehydrogenase (glucose 1-dehydrogenase)	9563	HGNC:4795|MIM:138090|Ensembl:ENSG00000049239|HPRD:00681|Vega:OTTHUMG00000001768	CORTRD1|G6PDH|GDH	NM_001282587	TGAGGAGCAGAGAGACTGTTCCCTTGGGTGGAGAGGTGTGGGCATGAGAG	chr1	9299902	9331394	+	N	N	N	N	II1	e0	-7.29	-7.8	-0.51	-0.00318643	0.198636	0.125031	0.990749	0.155908	0.488368	7.32982	7.32664	7.52846	7.45485
SPSB1	splA/ryanodine receptor domain and SOCS box containing 1	80176	HGNC:30628|MIM:611657|Ensembl:ENSG00000171621|HPRD:18106|Vega:OTTHUMG00000001279	SSB-1|SSB1	NM_025106	GTACAGATCCCAGCTTATGGCCTTGACCCAGCCGTCCTCACAGATGCCGG	chr1	9352940	9429590	+	N	N	N	N	II1	e0	-7.46	-5.96	1.5	0.497576	0.139351	0.047344	0.000320837	0.321555	0.845606	7.3924	7.88998	7.53175	7.43974
SLC25A33	solute carrier family 25 (pyrimidine nucleotide carrier), member 33	84275	HGNC:29681|MIM:610816|HPRD:14631	BMSC-MCP|PNC1	NM_032315	GAGACTGAAACAGGAAAGGCCATAAAATATCTGGTTCATATCACCTGTTG	chr1	9599527	9642831	+	N	N	N	N	II1	e0	-7.29	-5.02	2.27	0.0930005	-0.0383136	-0.00494536	0.471891	0.828087	0.984732	6.77384	6.86684	6.73553	6.76889
TMEM201	transmembrane protein 201	199953	HGNC:33719|Ensembl:ENSG00000188807|HPRD:17991|Vega:OTTHUMG00000057457	NET5	NM_001130924	TGGGTGACCGTCCCTGAGACATAAGCGAGGTAGATTCAGCCATCCTCACC	chr1	9648931	9674935	+	N	N	N	N	II1	e0	-7.04	-5.5	1.54	0.0480481	-0.19576	-0.0730862	0.811299	0.102438	0.704681	7.21507	7.26312	7.01931	7.14199
PIK3CD	phosphatidylinositol-4,5-bisphosphate 3-kinase, catalytic subunit delta	5293	HGNC:8977|MIM:602839|Ensembl:ENSG00000171608|Vega:OTTHUMG00000001450	P110DELTA|PI3K|p110D	NM_005026	AGCTCTGTTCTGATTCACCAGGGGTCCGTCAGTAGTCATTGCCACCCGCG	chr1	9711789	9789172	+	N	N	N	N	II1	e0	-6.09	-4.92	1.17	-0.0903383	0.365037	0.480392	0.572252	0.00308131	0.000370502	8.23306	8.14272	8.5981	8.71345
C1orf200	chromosome 1 open reading frame 200	644997	HGNC:32346|Ensembl:ENSG00000179840|Vega:OTTHUMG00000001452	-	NR_027045	GTCCTGTAAGCCCCCCAGGGGCTGATGCCCTCCCAGTCTGCCTGCCCTGT	chr1	9712667	9714644	-	N	N	N	N	II1	e0	-12.58	-7.21	5.37	0.0814622	-0.00809971	0.0925474	0.561048	0.970319	0.527468	6.85404	6.9355	6.84594	6.94658
CLSTN1	calsyntenin 1	22883	HGNC:17447|MIM:611321|Ensembl:ENSG00000171603|HPRD:10837|Vega:OTTHUMG00000001451	ALC-ALPHA|CDHR12|CSTN1|PIK3CD|XB31alpha|alcalpha1|alcalpha2	NM_014944	GACCCTGACTGCTAGTTCTGAGGACACTGGTGGCTGTGCTATGTGTGGCC	chr1	9789078	9884550	-	N	N	N	N	II1	e2	-4.82	-4.79	0.03	-0.491291	-0.509345	-0.470126	0.00289948	0.00225418	0.00459888	10.369	9.87766	9.85961	9.89883
CTNNBIP1	catenin, beta interacting protein 1	56998	HGNC:16913|MIM:607758|Ensembl:ENSG00000178585|HPRD:09677|Vega:OTTHUMG00000001796	ICAT	NM_020248	AGTCAGGTGTCGAGGCCACATTGCTGGCTGCCCCCTCTTTGTAGCTCCTA	chr1	9908333	9970316	-	N	N	N	N	II1	e2	-5.12	-4.64	0.48	-0.60855	-0.735009	-0.664186	0.000220461	3.94639e-05	0.000108123	8.03659	7.42804	7.30158	7.37241
LZIC	leucine zipper and CTNNBIP1 domain containing	84328	HGNC:17497|MIM:610458|Ensembl:ENSG00000162441|HPRD:14340|Vega:OTTHUMG00000001804	-	NM_032368	AAAGTCGCATCAGAGAGCTGAGGGTAAGACTCAGGTGTCCTGACTCCCAG	chr1	9989775	10002826	-	N	N	N	N	II1	e1	-4.68	-6.76	-2.08	0.509749	0.391406	0.304647	0.00137225	0.00961211	0.0460593	7.97001	8.47976	8.36142	8.27466
NMNAT1	nicotinamide nucleotide adenylyltransferase 1	64802	HGNC:17877|MIM:608700|Ensembl:ENSG00000173614|HPRD:16369|Vega:OTTHUMG00000001799	LCA9|NMNAT|PNAT1	NM_022787	AAAATCCGGAGAGCCCTCAGAAGGGGCCAGAGCATTCGCTACTTGGTACC	chr1	10003485	10045556	+	N	N	N	N	II1	e0	-3.09	-5.42	-2.33	0.257115	0.175607	0.196966	0.0398666	0.193848	0.150372	7.06908	7.3262	7.24469	7.26605
RBP7	retinol binding protein 7, cellular	116362	HGNC:30316|MIM:608604|Ensembl:ENSG00000162444|HPRD:16355|Vega:OTTHUMG00000001798	CRBP4|CRBPIV	NM_052960	GTGCAAACAGACATTCCAGAGAGCCTGATCCACATCCAGCAGCAGAGCCC	chr1	10057254	10076078	+	N	N	N	N	II1	e0	-3.67	-5.62	-1.95	0.096615	0.116365	0.113424	0.559705	0.452484	0.505859	6.74615	6.84276	6.86251	6.85957
UBE4B	ubiquitination factor E4B	10277	HGNC:12500|MIM:613565|Ensembl:ENSG00000130939|HPRD:11659|Vega:OTTHUMG00000001797	E4|HDNB1|UBOX3|UFD2|UFD2A	NM_006048	GGCCTTACCAAAGCAAAAGAGGGTGCAAGAATGTGGGAGTATGTCTGCCG	chr1	10093040	10241296	+	N	N	N	N	II1	e0	-2.71	-3.65	-0.94	0.0338282	-0.121803	0.00543545	0.870949	0.34722	0.984436	8.52973	8.56355	8.40792	8.53516
KIF1B	kinesin family member 1B	23095	HGNC:16636|MIM:605995|Ensembl:ENSG00000054523|HPRD:05818|Vega:OTTHUMG00000001817	CMT2|CMT2A|CMT2A1|HMSNII|KLP|NBLST1	NM_183416	GCCCAGGTTGGAAATGGAGCAGGCCAAAACTCCCAGGCTGATCAGTAATG	chr1	10270763	10368655	+	N	N	N	N	II1	e0	-2.74	-4.15	-1.41	0.234672	0.0725199	0.213642	0.136445	0.766034	0.213022	7.20727	7.44194	7.27979	7.42091
PGD	phosphogluconate dehydrogenase	5226	HGNC:8891|MIM:172200|Ensembl:ENSG00000142657|HPRD:01391|Vega:OTTHUMG00000001905	6PGD	NM_002631	CTGCTCCTGTCACCCTCCACGATTCCACAGACCAGGACATTCCATGTGCC	chr1	10459084	10480201	+	N	N	N	N	II1	e0	-6.58	-6.6	-0.02	-0.412227	-0.0778714	-0.019541	0.00180024	0.672645	0.947205	11.1577	10.7455	11.0798	11.1381
APITD1-CORT	APITD1-CORT readthrough	100526739	HGNC:38843|Ensembl:ENSG00000175279|Ensembl:ENSG00000251503|Vega:OTTHUMG00000162436	-	NM_198544	CAGCAAACAGACCATTGCGGCCATTTCGGAGCTGACTTTCCGACAGTGTG	chr1	10490158	10512060	+	N	N	N	N	II1	e0	-6.65	-7.99	-1.34	-0.0502934	-0.476866	-0.177631	0.867102	0.00406843	0.382429	9.52959	9.4793	9.05272	9.35196
APITD1	apoptosis-inducing, TAF9-like domain 1	378708	HGNC:23163|MIM:609130|Vega:OTTHUMG00000059085	CENP-S|CENPS|FAAP16|MHF1	NM_199294	CAGCAAACAGACCATTGCGGCCATTTCGGAGCTGACTTTCCGACAGTGTG	chr1	10490158	10502872	+	N	N	N	N	II1	e0	-6.86	-8.32	-1.46	-0.0502934	-0.476866	-0.177631	0.867102	0.00406843	0.382429	9.52959	9.4793	9.05272	9.35196
CORT	cortistatin	1325	HGNC:2257|MIM:602784|Ensembl:ENSG00000241563|HPRD:04150|Vega:OTTHUMG00000001906	CST-14|CST-17|CST-29	NM_001302	AGCAGGGTGGGAGAGAAGCTCCAGTCAGCCCACAAGATGCCATTGTCCCC	chr1	10509775	10512060	+	N	N	N	N	II1	e0	-6.5	-7.26	-0.76	0.0174044	0.0235613	0.0982537	0.92206	0.88643	0.380937	6.69725	6.71465	6.72081	6.7955
DFFA	DNA fragmentation factor, 45kDa, alpha polypeptide	1676	HGNC:2772|MIM:601882|HPRD:03531	DFF-45|DFF1|ICAD	NM_213566	AGGAGAGCAGCAGGAGAGGCGCACAGAAGGCCCAGTTCTCAGGGGTTTTT	chr1	10520602	10532613	-	N	N	N	N	II1	e0	-4.49	-8.05	-3.56	0.164442	0.185521	0.0917658	0.149909	0.0982414	0.559127	7.34616	7.51061	7.53168	7.43793
PEX14	peroxisomal biogenesis factor 14	5195	HGNC:8856|MIM:601791|Ensembl:ENSG00000142655|HPRD:03477|Vega:OTTHUMG00000001908	NAPP2|PBD13A|Pex14p|dJ734G22.2	NM_004565	TCATGCCCCGTCGTCCTCCCAGACAAATGAAACCACGCTGCGCTTCCGAT	chr1	10535002	10690815	+	N	N	N	N	II1	e0	-4.91	-4.85	0.06	-0.0352894	-0.219803	-0.2465	0.878608	0.0760065	0.0484822	7.88313	7.84784	7.66332	7.63663
CASZ1	castor zinc finger 1	54897	HGNC:26002|MIM:609895|Ensembl:ENSG00000130940|HPRD:07897|Vega:OTTHUMG00000002035	CAS11|CST|SRG|ZNF693|dJ734G22.1	NM_001079843	TTTTGTCCTCTCAGCTGCCCACAGCCAGAAAGCCAGGACCACCCGAACTG	chr1	10696665	10856733	-	N	N	N	N	II1	e0	-6.5	-5.63	0.87	-0.136638	-0.110571	-0.0252582	0.208303	0.349836	0.910224	6.89313	6.75649	6.78256	6.86787
C1orf127	chromosome 1 open reading frame 127	148345	HGNC:26730|Ensembl:ENSG00000175262|HPRD:08780|Vega:OTTHUMG00000002032	-	NM_001170754	CTGGCTTAGATGCCCAGCTGTGGCTGGGTACAGTGTTCTGGGCCGGAAGA	chr1	11006529	11042094	-	N	N	N	N	II1	e0	-6.93	-5.85	1.08	-0.0431139	0.0817455	-0.0225699	0.845353	0.644722	0.936322	6.83198	6.78887	6.91372	6.80941
TARDBP	TAR DNA binding protein	23435	HGNC:11571|MIM:605078|HPRD:05466	ALS10|TDP-43	NM_007375	TCGGGGACCTCCAAAGACTAAACTGACAAGCCTTCAAGGAGCCCAGGGGT	chr1	11072678	11085549	+	N	N	N	N	II1	e2	-5.99	-5.63	0.36	-0.561324	-0.578995	-0.605194	0.00218408	0.00174447	0.00135299	8.33555	7.77423	7.75655	7.73036
MASP2	mannan-binding lectin serine peptidase 2	10747	HGNC:6902|MIM:605102|Ensembl:ENSG00000009724|HPRD:05484|Vega:OTTHUMG00000002121	MAP19|MASP-2|MASP1P1|sMAP	NM_006610	AACGAGAAGCCGTTCACGGGGTTCGAGGCCTTCTATGCAGCCGAGGACAT	chr1	11086579	11107296	-	N	N	N	N	II1	e0	-6.57	-6.65	-0.08	0.141187	0.159473	0.146515	0.229037	0.160909	0.235228	6.70917	6.85036	6.86865	6.85569
SRM	spermidine synthase	6723	HGNC:11296|MIM:182891|Ensembl:ENSG00000116649|HPRD:01692|Vega:OTTHUMG00000002119	PAPT|SPDSY|SPS1|SRML1	NM_003132	GACCTCCTGCTGGCTCTCGCCCACCAACCAAGTGTTACAAGCCCCAGAAT	chr1	11114648	11120091	-	N	N	N	N	II1	e0	-5.63	-4.67	0.96	0.216966	0.239615	0.186877	0.121488	0.0842339	0.228343	10.0936	10.3106	10.3332	10.2805
EXOSC10	exosome component 10	5394	HGNC:9138|MIM:605960|Ensembl:ENSG00000171824|HPRD:16180|Vega:OTTHUMG00000002123	PM-Scl|PM/Scl-100|PMSCL|PMSCL2|RRP6|Rrp6p|p2|p3|p4	NM_001001998	GACAGAGGCTTCAGGTACAACTGGCCACAGAGATAGTCCTGGAAGACACG	chr1	11126675	11159938	-	N	N	N	N	II1	e0	-3.65	-4.13	-0.48	0.299459	0.24933	0.155836	0.1351	0.242946	0.582179	10.6544	10.9539	10.9037	10.8102
MTOR	mechanistic target of rapamycin (serine/threonine kinase)	2475	HGNC:3942|MIM:601231|Ensembl:ENSG00000198793|HPRD:03134|Vega:OTTHUMG00000002001	FRAP|FRAP1|FRAP2|RAFT1|RAPT1	NM_004958	GACCTGACCGCTAGTAGGGAGGTTTATTCAGATCGCTGGCAGCCTCGGCT	chr1	11166587	11322608	-	N	N	N	N	II1	e0	-3.82	-3.85	-0.03	0.0742093	0.0594591	0.0828533	0.622258	0.719071	0.606364	9.50055	9.57476	9.56001	9.58341
ANGPTL7	angiopoietin-like 7	10218	HGNC:24078|Ensembl:ENSG00000171819|HPRD:10818|Vega:OTTHUMG00000002002	AngX|CDT6|RP4-647M16.2|dJ647M16.1	NM_021146	CCCCTGCTCGCCTTGGTCATGTACAGCACTGAAAGGAATGAAGCACCAGC	chr1	11249345	11256038	+	N	N	N	N	II1	e0	-4.8	-0.92	3.88	0.0368632	0.0420907	0.112317	0.846843	0.813668	0.405583	6.69186	6.72873	6.73395	6.80418
UBIAD1	UbiA prenyltransferase domain containing 1	29914	HGNC:30791|MIM:611632|Ensembl:ENSG00000120942|HPRD:15487|Vega:OTTHUMG00000002075	RP4-796F18.1|SCCD|TERE1	NM_013319	GGAATGTGATTTGGCAGTCAGGGTACTAAGCATGGGTGGGAACTCCTGCC	chr1	11333254	11348491	+	N	N	N	N	II1	e0	-5.61	-5.65	-0.04	0.330294	0.097694	0.147126	0.143785	0.783845	0.669753	9.07639	9.40669	9.17409	9.22352
PTCHD2	patched domain containing 2	57540	HGNC:29251|MIM:611251|Ensembl:ENSG00000204624|Vega:OTTHUMG00000002074	DISP3	NM_020780	AAGGACCCGGCTTGGGCTTCTGCATGTCCTACCCCTGACCCCAGCCTCAA	chr1	11539294	11597640	+	N	N	N	N	II1	e0	-6.18	-3.72	2.46	-0.0824869	-0.0451213	-0.0209404	0.642896	0.833215	0.942955	6.89302	6.81053	6.84789	6.87208
FBXO2	F-box protein 2	26232	HGNC:13581|MIM:607112|Ensembl:ENSG00000116661|HPRD:06171|Vega:OTTHUMG00000002072	FBG1|FBX2|Fbs1|NFB42|OCP1	NM_012168	CTGCGGGCTGCGCGAGTCCCGGGGCGGCGAGTCCCGGCGCTGTCCGCGTC	chr1	11708417	11714888	-	N	N	N	N	II1	e0	-5.64	-4.6	1.04	-0.0694507	-0.230939	0.0151256	0.694702	0.0520437	0.958265	6.93285	6.8634	6.70191	6.94798
FBXO44	F-box protein 44	93611	HGNC:24847|MIM:609111|Ensembl:ENSG00000132879|HPRD:16445|Vega:OTTHUMG00000002071	FBG3|FBX30|FBX6A|Fbx44|Fbxo6a	NM_183412	CTGCGGGCTGCGCGAGTCCCGGGGCGGCGAGTCCCGGCGCTGTCCGCGTC	chr1	11714431	11723384	+	N	N	N	N	II1	e0	-5.8	-9.16	-3.36	-0.0694507	-0.230939	0.0151256	0.694702	0.0520437	0.958265	6.93285	6.8634	6.70191	6.94798
FBXO6	F-box protein 6	26270	HGNC:13585|MIM:605647|Ensembl:ENSG00000116663|HPRD:07291|Vega:OTTHUMG00000002229	FBG2|FBS2|FBX6|Fbx6b	NM_018438	GACTCCTGCCCCGGTTCAACCCTACCAGCTTGTGGTAACTTACTGTCACA	chr1	11724149	11734409	+	N	N	N	N	II1	e0	-7.15	-6.27	0.88	-0.0230203	0.0847501	0.0571823	0.915666	0.56814	0.770253	7.03626	7.01324	7.12101	7.09344
MAD2L2	MAD2 mitotic arrest deficient-like 2 (yeast)	10459	HGNC:6764|MIM:604094|Ensembl:ENSG00000116670|HPRD:07246|Vega:OTTHUMG00000002231	MAD2B|POLZ2|REV7	NM_006341	TGGCTGCCCTGATTCCAAGTGCTCTTATCGCCTCTGTGTGTGGATCGCCC	chr1	11734536	11741271	-	N	N	N	N	II1	e0	-9.33	-6.97	2.36	0.00831579	-0.280161	-0.397104	0.976726	0.0365685	0.00446564	11.3836	11.392	11.1035	10.9865
DRAXIN	dorsal inhibitory axon guidance protein	374946	HGNC:25054|MIM:612682|HPRD:11844	AGPA3119|C1orf187|UNQ3119|neucrin	NM_198545	GTAGGCATTATCACCATGCGACAGGTTGAGGACCGTGAGGCACGCTGGAG	chr1	11751780	11780336	+	N	N	N	N	II1	e0	-8.02	-6.5	1.52	-0.14285	-0.10569	0.251085	0.505024	0.66673	0.172987	7.10199	6.95914	6.9963	7.35307
AGTRAP	angiotensin II receptor-associated protein	57085	HGNC:13539|MIM:608729|Ensembl:ENSG00000177674|HPRD:16379|Vega:OTTHUMG00000002230	ATRAP	NM_001040197	TTTAAGGACTGCTGATGCCCCCTCAGGCCTCCCCCAAGTTTGCTGGGCTT	chr1	11796141	11810828	+	N	N	N	N	II1	e0	-5.7	-5.65	0.05	-0.416012	-0.230126	-0.15635	0.00343342	0.104451	0.362057	7.32309	6.90708	7.09297	7.16674
MTHFR	methylenetetrahydrofolate reductase (NAD(P)H)	4524	HGNC:7436|MIM:607093|Ensembl:ENSG00000177000|HPRD:06158|Vega:OTTHUMG00000002277	-	NM_005957	GGTGCCATTCCCAGCGTTTAGTTTCTAGAGGCCTCAGTTTCTCCATCAGC	chr1	11845786	11866160	-	N	N	N	N	II1	e0	-8.11	-7.27	0.84	-0.195675	0.425986	0.212104	0.218494	0.00476596	0.196849	7.58583	7.39015	8.01182	7.79793
CLCN6	chloride channel, voltage-sensitive 6	1185	HGNC:2024|MIM:602726|Ensembl:ENSG00000011021|HPRD:04102|Vega:OTTHUMG00000002299	CLC-6	NR_046428	GAGAGGCCCAAGGTGGCCTCGCCAGCCCTGCAGTATTGATGTGCAGTATT	chr1	11866152	11903201	+	N	N	N	N	II1	e1	-6.61	-6.19	0.42	0.126632	0.751553	0.313357	0.593271	0.000181472	0.0823625	8.18826	8.31489	8.93981	8.50161
NPPA	natriuretic peptide A	4878	HGNC:7939|MIM:108780|Ensembl:ENSG00000175206|HPRD:00164|Vega:OTTHUMG00000002388	ANF|ANP|ATFB6|CDD-ANF|PND	NM_006172	CTGTAGATAAAGTGGTTTGATGGTGACTTCCTCGCCTCTCCCACCCCATG	chr1	11905766	11907840	-	N	N	N	N	II1	e0	-6.79	-5.76	1.03	0.0560568	0.029401	0.0311964	0.744299	0.883753	0.894168	6.8683	6.92435	6.8977	6.89949
NPPB	natriuretic peptide B	4879	HGNC:7940|MIM:600295|Ensembl:ENSG00000120937|HPRD:08974|Vega:OTTHUMG00000002389	BNP	NM_002521	TCCTCCAGTGGCCTGGGCTGCAAAGTGCTGAGGCGGCATTAAGAGGAAGT	chr1	11917520	11918992	-	N	N	N	N	II1	e0	-8.42	-9.7	-1.28	0.00385225	0.107538	-0.0343248	0.986	0.365775	0.869887	6.72352	6.72737	6.83105	6.68919
KIAA2013	KIAA2013	90231	HGNC:28513|Ensembl:ENSG00000116685|HPRD:14576|Vega:OTTHUMG00000002391	-	NM_138346	TCAGCCACCATTTGCACAAGACACCCAGCACTGAAAGTCCCGCTGCCAGG	chr1	11979644	11986485	-	N	N	N	N	II1	e0	-4.78	-7.93	-3.15	0.0214165	0.00765858	0.104735	0.943659	0.980192	0.646625	9.0462	9.06762	9.05386	9.15093
PLOD1	procollagen-lysine, 2-oxoglutarate 5-dioxygenase 1	5351	HGNC:9081|MIM:153454|Ensembl:ENSG00000083444|HPRD:01086|Vega:OTTHUMG00000002393	EDS6|LH|LH1|LLH|PLOD	NM_000302	CCTGTCCTGGATGCCTCTGAAGAGAGGGACAGACCGTCAGAAACTGGAGA	chr1	11994723	12035599	+	N	N	N	N	II1	e1	-4.14	-4.05	0.09	0.0132966	0.868178	0.882474	0.983426	0.00529034	0.00525789	8.82357	8.83686	9.69174	9.70604
MFN2	mitofusin 2	9927	HGNC:16877|MIM:608507|Ensembl:ENSG00000116688|HPRD:08495|Vega:OTTHUMG00000002392	CMT2A|CMT2A2|CPRP1|HSG|MARF	NM_014874	TGATGGACTCTGCCAGGTGGACATGCTGTGGGTGGATGTTCCCGGCGTGT	chr1	12040237	12073572	+	N	N	N	N	II1	e0	-5.52	-5.55	-0.03	0.114852	0.115733	0.306282	0.72543	0.721608	0.193009	8.6318	8.74665	8.74753	8.93808
MIIP	migration and invasion inhibitory protein	60672	HGNC:25715|MIM:608772|Ensembl:ENSG00000116691|HPRD:07768|Vega:OTTHUMG00000002439	IIP45	NM_021933	TGTCCGGCACCAGCAGCCCTTTTCACCCGGCCTCACCAATGCAGATGCTG	chr1	12079298	12092106	+	N	N	N	N	II1	e0	-6.72	-9.34	-2.62	-0.239131	-0.0044107	-0.0300152	0.282123	0.990669	0.949405	7.86852	7.62939	7.86411	7.8385
TNFRSF8	tumor necrosis factor receptor superfamily, member 8	943	HGNC:11923|MIM:153243|Ensembl:ENSG00000120949|HPRD:01074|Vega:OTTHUMG00000001827	CD30|D1S166E|Ki-1	NM_001281430	CCGCTCAGATGTTTTGGGGAAAGTTGGAGAAGCCGTGGCCTTGCGAGAGG	chr1	12123433	12204264	+	N	N	N	N	II1	e1	-5.63	-4.88	0.75	0.526846	-0.0482362	-0.201088	0.00137289	0.862516	0.26377	7.65909	8.18594	7.61086	7.458
TNFRSF1B	tumor necrosis factor receptor superfamily, member 1B	7133	HGNC:11917|MIM:191191|Ensembl:ENSG00000028137|HPRD:01862|Vega:OTTHUMG00000001829	CD120b|TBPII|TNF-R-II|TNF-R75|TNFBR|TNFR1B|TNFR2|TNFR80|p75|p75TNFR	NM_001066	TGGCATCACAGGGCAGAGCCGGGAAGCGATGAATTTGGAGACTCTGTGGG	chr1	12227059	12269277	+	N	N	N	N	II1	e1	-6.34	-5.99	0.35	1.32143	1.91116	2.22149	4.53199e-07	8.81324e-09	1.78008e-09	6.81536	8.13679	8.72652	9.03685
VPS13D	vacuolar protein sorting 13 homolog D (S. cerevisiae)	55187	HGNC:23595|MIM:608877|Ensembl:ENSG00000048707|HPRD:10593|Vega:OTTHUMG00000013155	-	NM_018156	CCTCCCCCTTGTCTACCTTAGAACTAGGAGTACAGCCAGTCTGACTAACC	chr1	12290112	12572098	+	N	N	N	N	II1	e0	-3.59	-3.32	0.27	-0.091852	0.0929778	-0.0480625	0.480649	0.478068	0.804088	6.79583	6.70397	6.8888	6.74776
SNORA59A	small nucleolar RNA, H/ACA box 59A	677885	HGNC:32653	ACA59	NR_003025	CCTGGGAACATTAACTGCCTCACAACGTTTGTGCCTCAGTTACCCGTAGA	chr17	19460872	19461024	+	N	N	N	N	II1	e0	-4.55	1.7	6.25	0.0745445	0.0704736	-0.0119882	0.668466	0.691035	0.967156	7.35172	7.42627	7.4222	7.33973
SNORA59B	small nucleolar RNA, H/ACA box 59B	677882	HGNC:32658	ACA59	NR_003022	GCCCAGGGTATGTTCACGGGGCGATGCTGCCCTCCCAGCTGGCCCATGGG	chr17	19460872	19461024	+	N	N	N	N	II1	e0	-4.55	1.7	6.25	0.0686387	-0.0741414	-0.0728377	0.70547	0.675947	0.716723	7.12578	7.19442	7.05164	7.05294
DHRS3	dehydrogenase/reductase (SDR family) member 3	9249	HGNC:17693|MIM:612830|Ensembl:ENSG00000162496|HPRD:09915|Vega:OTTHUMG00000001885	DD83.1|RDH17|Rsdr1|SDR1|SDR16C1|retSDR1	NM_004753	TGACCCCCACAGGGAGGCAGGAAAACAGCCAGAAGCCACCTTGACACTTT	chr1	12627938	12677820	-	N	N	N	N	II1	e0	-5.12	-5.39	-0.27	-0.108361	0.297384	0.393628	0.659709	0.0840326	0.0221306	7.22196	7.1136	7.51935	7.61559
AADACL4	arylacetamide deacetylase-like 4	343066	HGNC:32038|Ensembl:ENSG00000204518|HPRD:15402|Vega:OTTHUMG00000001889	-	NM_001013630	CCCCGAGGAGGAAGGGGCAAGTATGGACTCTACCAGAAACCGGGTGCTTT	chr1	12704565	12727097	+	N	N	N	N	II1	e0	-4.2	-3.42	0.78	-0.00175961	-0.0536746	-0.0225017	0.995151	0.861508	0.956419	6.8337	6.83194	6.78002	6.8112
AADACL3	arylacetamide deacetylase-like 3	126767	HGNC:32037|Ensembl:ENSG00000188984|Vega:OTTHUMG00000001887	-	NM_001103170	GGGGTTTGCACATTCTGCCCATGTCTGCGTGGGTTTTCTCTGAGTTCTCC	chr1	12776117	12788726	+	N	N	N	N	II1	e0	0.15	-2.06	-2.21	0.100167	0.145653	0.127242	0.484253	0.242391	0.36809	6.76589	6.86606	6.91154	6.89313
C1orf158	chromosome 1 open reading frame 158	93190	HGNC:28567|HPRD:14604	-	NM_152290	AGCTGGAGACCACAGCATCACTGGACTTGCCAGACAACAAGTGGCGCAGA	chr1	12806162	12821102	+	N	N	N	N	II1	e0	-1.52	-1.63	-0.11	-0.0177207	0.0186602	0.0152742	0.94925	0.947037	0.962661	6.7891	6.77138	6.80776	6.80438
PRAMEF12	PRAME family member 12	390999	HGNC:22125|Ensembl:ENSG00000116726|Vega:OTTHUMG00000001927	-	NM_001080830	TGGCAACTGAATCCTAGGCCATGAGTGTATGTCAAAGGGAGCACAGACCC	chr1	12834990	12838048	+	N	N	N	N	II1	e0	-5.42	-2.37	3.05	0.026461	0.0713571	0.0098651	0.895702	0.626049	0.968662	6.74884	6.7753	6.8202	6.75871
PRAMEF1	PRAME family member 1	65121	HGNC:28840|Ensembl:ENSG00000116721|HPRD:11272|Vega:OTTHUMG00000001928	-	NM_023013	AAAGCATCTGAATCTCAGCTACGTGCTGCTGTTCCGCATCAGTCTTGAAC	chr1	12851545	12856777	+	N	N	N	N	II1	e0	-2.46	-4.02	-1.56	-0.0645844	-0.0197089	-0.111722	0.724112	0.934809	0.483957	6.80272	6.73814	6.78301	6.691
PRAMEF11	PRAME family member 11	440560	HGNC:14086|Ensembl:ENSG00000204513|Vega:OTTHUMG00000001929	RP5-845O24.2	NM_001146344	AGCTGATGAAGAAAGTGAGGCACTTAAGGCACCCCAAGAGGATCTTGTTC	chr1	12884467	12891264	-	N	N	N	N	II1	e0	-5.08	-5.2	-0.12	-0.0219022	-0.036773	-0.115435	0.909807	0.823343	0.324773	6.75778	6.73588	6.72101	6.64235
LOC649330	heterogeneous nuclear ribonucleoprotein C-like	649330	-	-	NM_001146181	GGAGTTAGAAGTATGTGTGTTACACCCCATGTCAGTGTGCTGTGTGGGGC	chr1	12907235	12908237	-	N	N	N	N	II1	e0	2.57	-2	-4.57	0.187232	0.0387962	-0.0248749	0.282575	0.89458	0.945771	7.55352	7.74076	7.59232	7.52865
HNRNPCL1	heterogeneous nuclear ribonucleoprotein C-like 1	343069	HGNC:29295|Ensembl:ENSG00000179172|HPRD:15466|Vega:OTTHUMG00000001931	HNRPCL1	NM_001013631	CTGAGCTACAACTACAACCAGAGGTCTAAACTACAACCAGATCTGAATTC	chr1	12907260	12908578	-	N	N	N	N	II1	e0	2.57	-2	-4.57	0.0783887	0.0814575	-0.0209905	0.516611	0.501102	0.919667	6.71241	6.7908	6.79387	6.69142
PRAMEF2	PRAME family member 2	65122	HGNC:28841|Ensembl:ENSG00000120952|HPRD:11273|Vega:OTTHUMG00000001986	DJ845O24.3|RP5-845O24.1	NM_023014	GTACACTGAGGGAATTCAGGCAGCCCAAGAGGATCTTCATTGGCCCCACC	chr1	12916940	12921764	+	N	N	N	N	II1	e0	-3.26	-3.26	0	0.0322762	0.0565127	-0.0119614	0.879923	0.751205	0.965228	6.70682	6.73909	6.76333	6.69486
PRAMEF4	PRAME family member 4	400735	HGNC:31971|Ensembl:ENSG00000243073|HPRD:17992|Vega:OTTHUMG00000001987	RP5-845O24.6	NM_001009611	TGGATTCGATGGGACTTTGGGGACCTGTGTCCTGTAGAGTCGAAAATGGG	chr1	12939032	12946025	-	N	N	N	N	II1	e0	-4.39	-2.43	1.96	0.128745	0.142051	0.144299	0.389993	0.327421	0.352649	6.76095	6.8897	6.903	6.90525
PRAMEF10	PRAME family member 10	343071	HGNC:27997|Ensembl:ENSG00000187545|Vega:OTTHUMG00000001981	RP5-845O24.7	NM_001039361	CCTGCCCTGAGCCACTGTTCCCAGCTCACCACCTTCAACTTTCATGGAAA	chr1	12952726	12958094	-	N	N	N	N	II1	e0	-2.72	-4.01	-1.29	-0.0516379	-0.0935314	-0.125802	0.755715	0.476298	0.311467	6.82952	6.77789	6.73599	6.70372
PRAMEF7	PRAME family member 7	441871	HGNC:28415|Ensembl:ENSG00000204510|HPRD:17409|Vega:OTTHUMG00000001982	-	NM_001012277	TCTTCCCCACACTGTTCATGGAGGCCTTCAGCAGGAGACGCTGTGAAACC	chr1	13607699	13611533	-	N	N	N	N	II1	e0	-1.03	-1.57	-0.54	0.104724	-0.0143027	0.0416292	0.333859	0.941078	0.817336	6.71388	6.81861	6.69958	6.75551
PRAMEF8	PRAME family member 8	391002	HGNC:24074|Ensembl:ENSG00000182330|HPRD:17382|Vega:OTTHUMG00000008037	-	NM_001012276	AGAGTGGGGCAAGCAGAGAAAAGGCTTACTGCATGTGTGTTGCCAGGAGC	chr1	13607699	13611533	-	N	N	N	N	II1	e0	-1.03	-1.57	-0.54	-0.0146193	-0.00581876	0.0303904	0.957082	0.982961	0.915784	6.77462	6.76	6.7688	6.80501
PRAMEF6	PRAME family member 6	440561	HGNC:30583|Ensembl:ENSG00000232423|HPRD:17358|Vega:OTTHUMG00000001984	-	NM_001010889	ACACCAGTGCAGGACTGTCCAAGGATGAGAGGACAGCAGCCCTTGACTGT	chr1	12998301	13007406	-	N	N	N	N	II1	e0	-3.56	-1.53	2.03	0.01882	0.00313406	-0.0159977	0.934638	0.989098	0.953282	6.62449	6.64331	6.62762	6.60849
PRAMEF22	PRAME family member 22	653606	HGNC:34393|Ensembl:ENSG00000204508|Vega:OTTHUMG00000074726	PRAMEF3L	NM_001100631	GTATGATAGTAGAGTTTAGCCGTTACCTGAGCCAGATGAGGAATCTTCGC	chr1	13035542	13038381	+	N	N	N	N	II1	e0	-3	-2.57	0.43	0.107282	-0.0122804	0.0548624	0.298651	0.949208	0.720958	6.72519	6.83248	6.71291	6.78006
PRAMEF5	PRAME family member 5	343068	HGNC:27995|Ensembl:ENSG00000204502|Vega:OTTHUMG00000009505	-	NM_001013407	CACATGGATGTCTCTCGCTACGTTTCCCCAGAGCAGAAGAAGGAGATTGT	chr1	13359818	13369057	+	N	N	N	N	II1	e0	-4.2	-1.8	2.4	-0.0468043	-0.0795225	-0.0791505	0.828137	0.657251	0.692108	6.78623	6.73943	6.70671	6.70708
PRAMEF23	PRAME family member 23	729368	HGNC:34394|Ensembl:ENSG00000232423	PRAMEF5L	NM_001282323	CCGGGAGAGTTATGATGCTGATGGTACTCTCTGCTGGAGCAGATTTCCTC	chr1	13364890	13368733	+	N	N	N	N	II1	e0	-5.18	-2.21	2.97	-0.0221122	-0.0574812	-0.0280986	0.904646	0.675898	0.887876	6.74159	6.71948	6.68411	6.71349
HNRNPCP5	heterogeneous nuclear ribonucleoprotein C pseudogene 5	440563	HGNC:48813	-	NM_001136561	CAGAGACAGCACCAATGGCCAGGATGACTCTTAAGCACATAGTGGGGTTG	chr1	13182959	13184326	-	N	N	N	N	II1	e0	-4.49	-0.71	3.78	-0.0428565	-0.051939	-0.0157225	0.791861	0.730578	0.944888	7.0513	7.00844	6.99936	7.03558
PRAMEF3	PRAME family member 3	401940	HGNC:14087|Ensembl:ENSG00000204503|HPRD:18435|Vega:OTTHUMG00000009404	-	NM_001013692	GTGGGGTGGAGGTATAAAAAGCTTTTTCTCCAGGCACTTGGAAACTAAAA	chr1	13328195	13331692	-	N	N	N	N	II1	e0	-1.97	-2.39	-0.42	0.0208883	-0.00619419	-0.0340692	0.938334	0.982365	0.908452	6.74029	6.76117	6.73409	6.70622
PRAMEF15	PRAME family member 15	653619	HGNC:26764|Ensembl:ENSG00000157358|Vega:OTTHUMG00000007921	-	NM_001098376	CCACCCTGGAGAACCTGCTGAGCCACACAATCATACTCAAAAACTTATGT	chr1	13421175	13428190	+	N	N	N	N	II1	e0	-4.62	-2.81	1.81	-0.0226789	-0.0536722	0.0511105	0.91139	0.735616	0.784792	6.7497	6.72702	6.69603	6.80081
PRAMEF9	PRAME family member 9	343070	HGNC:27996|Ensembl:ENSG00000204501|HPRD:18596|Vega:OTTHUMG00000008035	-	NM_001010890	TGGATTCGATGGGACTTTGGGGACCTGTGTCCTGTAGATTCGAAAATGGG	chr1	13421175	13428191	+	N	N	N	N	II1	e0	-4.62	-2.81	1.81	0.014688	0.076319	0.0501071	0.949105	0.628016	0.811057	6.82727	6.84196	6.90359	6.87738
PRAMEF13	PRAME family member 13	400736	HGNC:13262|Ensembl:ENSG00000204495|Vega:OTTHUMG00000008034	-	NM_001024661	TGTGATTGAGTTTCAGCTGTAGAACATCAAAGCAACCAAATAGAATTTGA	chr1	13447413	13452656	-	N	N	N	N	II1	e0	-1.83	0.54	2.37	0.0579791	0.0360751	0.0562231	0.733571	0.851478	0.775719	6.66121	6.71919	6.69728	6.71743
PRAMEF18	PRAME family member 18	391003	HGNC:30693|Vega:OTTHUMG00000002932	-	NM_001099850	GGCCTTCACTAGCAGACGCTGCGAGGTTCTGAAGGTGATGGTGCAGGCCT	chr1	13474052	13477569	-	N	N	N	N	II1	e0	-2.27	0.27	2.54	0.0249771	-0.0275453	0.0197592	0.930346	0.921348	0.953819	6.67129	6.69627	6.64374	6.69105
PRAMEF19	PRAME family member 19	645414	HGNC:24908|Ensembl:ENSG00000204480|Vega:OTTHUMG00000007919	-	NM_001099790	ACAGGATCTTCTTTGGTCCCGTCTCCTGCCCTTGCTGTGGCATGTCACCC	chr1	13474052	13477569	-	N	N	N	N	II1	e0	-2.27	0.27	2.54	0.0948628	0.10121	0.1127	0.476005	0.438686	0.403326	6.77028	6.86515	6.87149	6.88298
PRAMEF16	PRAME family member 16	654348	HGNC:25767|Ensembl:ENSG00000204488|Vega:OTTHUMG00000002933	-	NM_001045480	GTGAAGGCCTGATTAGTGGGATGGATATGCTTTCTTCAGGACCCTTAGGC	chr1	13495253	13498259	+	N	N	N	N	II1	e0	-1.5	-3.64	-2.14	0.00414727	0.0366275	0.0251641	0.983191	0.818614	0.903566	6.62993	6.63407	6.66655	6.65509
PRAMEF20	PRAME family member 20	645425	HGNC:25224|Ensembl:ENSG00000204478|Vega:OTTHUMG00000007911	-	NM_001099852	CTGCTTGGTTTTTCCTGAGGTCTGAGCACCCTGCAAACTGAGTCCAGATC	chr1	13736906	13747803	+	N	N	N	N	II1	e0	-5.45	-5.93	-0.48	0.189732	0.151649	0.0893638	0.0293277	0.0903582	0.435636	6.57539	6.76512	6.72704	6.66475
PRAMEF21	PRAME family member 21	391001	HGNC:22405|Ensembl:ENSG00000204486|Vega:OTTHUMG00000002919	-	NM_001100114	CTCAGTGTGGCAACAGGTCACTTTACGACCTGGAGGTAGATCGGTGTTGC	chr1	13742801	13747803	+	N	N	N	N	II1	e0	-4.68	-4.53	0.15	-0.0726918	-0.0357193	-0.00659257	0.676235	0.86791	0.982404	6.78775	6.71506	6.75204	6.78116
PRAMEF17	PRAME family member 17	391004	HGNC:29485|Ensembl:ENSG00000204479|Vega:OTTHUMG00000007909	-	NM_001099851	CAAACTCTTTTTAGCCTTCGGTTATGACGATGAGTTATATGTAAGCGGCC	chr1	13716091	13719089	+	N	N	N	N	II1	e0	0.49	-2.96	-3.45	-0.0386437	-0.020648	-0.00715505	0.863505	0.933015	0.981282	6.84633	6.80768	6.82568	6.83917
LRRC38	leucine rich repeat containing 38	126755	HGNC:27005|MIM:615212|Ensembl:ENSG00000162494|Vega:OTTHUMG00000007918	RP4-597A16.1	NM_001010847	AAGAAATCAGCTGCCCATGAACCGAGAAGCAGGCCCTCACCAGAACCCAG	chr1	13801444	13840242	-	N	N	N	N	II1	e2	-7.11	-5.82	1.29	-0.719976	-0.730211	-0.873192	0.000638681	0.000567199	0.000127187	7.72187	7.00189	6.99165	6.84867
PDPN	podoplanin	10630	HGNC:29602|MIM:608863|Ensembl:ENSG00000162493|HPRD:16398|Vega:OTTHUMG00000007912	AGGRUS|GP36|GP40|Gp38|HT1A-1|OTS8|PA2.26|T1A|T1A-2	NM_198389	TGAGTAGCTGGGACTACAGGTTCCTACCACCACACCCGGCCAATTTTTGT	chr1	13910251	13944452	+	N	N	N	N	II1	e0	-3.43	-1.92	1.51	-0.0232151	-0.0278439	-0.0381869	0.936685	0.92213	0.904396	6.697	6.67379	6.66916	6.65882
PRDM2	PR domain containing 2, with ZNF domain	7799	HGNC:9347|MIM:601196|Ensembl:ENSG00000116731|HPRD:03120|Vega:OTTHUMG00000007917	HUMHOXY1|KMT8|MTB-ZF|RIZ|RIZ1|RIZ2	NM_001007257	GCCCAGTTCCAGGGACCATTCTTCAAAGAGTAGACACTCTGGCTGCTCCC	chr1	14075875	14114574	+	N	N	N	N	II1	e0	-6.24	-5.9	0.34	-0.228222	-0.123002	-0.17696	0.0221553	0.275628	0.0932435	7.0963	6.86807	6.97329	6.91934
KAZN	kazrin, periplakin interacting protein	23254	HGNC:29173|Ensembl:ENSG00000189337|HPRD:11122|Vega:OTTHUMG00000002042	KAZ	NM_001018000	CACGAGTGTGAACCTCTCTCCCCTGCGTCGCCACCTCTGTAATTGATGTA	chr1	15250624	15394651	+	N	N	N	N	II1	e0	-6.11	-5.43	0.68	0.0822719	0.0342969	-0.0587155	0.604029	0.869542	0.778703	7.15935	7.24162	7.19364	7.10063
TMEM51-AS1	TMEM51 antisense RNA 1	200197	HGNC:26301|HPRD:08673	C1orf126|RP1-21O18.2	NR_027136	TGGGGCCCAGGATCATAAGTGTGCCCTTAAGAGGCCAAACAGTCCACCTG	chr1	15438310	15478960	-	N	N	N	N	II1	e0	-4.2	-5.96	-1.76	0.000379886	0.0736657	0.055393	0.998276	0.579787	0.738589	6.66963	6.67001	6.74329	6.72502
TMEM51	transmembrane protein 51	55092	HGNC:25488|Ensembl:ENSG00000171729|HPRD:07651|Vega:OTTHUMG00000002046	C1orf72	NM_001136217	CTACGCTGGAGTCCTGAACTGTGGGTAGAAAACACGACCTGGCTTTGTAG	chr1	15479027	15546974	+	N	N	N	N	II1	e0	-4.79	-5.23	-0.44	-0.0495275	-0.0577236	-0.000691025	0.819804	0.775405	0.997789	6.93553	6.886	6.87781	6.93484
FHAD1	forkhead-associated (FHA) phosphopeptide binding domain 1	114827	HGNC:29408|Ensembl:ENSG00000142621|Vega:OTTHUMG00000002088	-	NM_052929	CAGACTCACACTTGAGAAAACCTAAGACTTGTACTGGAGCCTCAGGGCAG	chr1	15573767	15724622	+	N	N	N	N	II1	e0	-3.84	-4.27	-0.43	-0.0181941	-0.0157416	-0.0031255	0.929768	0.940202	0.989929	6.76066	6.74247	6.74492	6.75754
EFHD2	EF-hand domain family, member D2	79180	HGNC:28670|Ensembl:ENSG00000142634|HPRD:13266|Vega:OTTHUMG00000002254	SWS1	NM_024329	CAGCGCAGCAGCCTCGGACCCGGATTGCGTTTGCCTTAGCGGATATGTTT	chr1	15736390	15756839	+	N	N	N	N	II1	e1	-8.3	-6.67	1.63	1.50151	0.57063	0.26615	6.02704e-09	0.000106934	0.0351049	10.1604	11.6619	10.731	10.4265
CTRC	chymotrypsin C (caldecrin)	11330	HGNC:2523|MIM:601405|Ensembl:ENSG00000162438|HPRD:03242|Vega:OTTHUMG00000002255	CLCR|ELA4	NM_007272	CCCGGGTGTCCGCCTACATCGACTGGATCAACGAGAAAATGCAGCTGTGA	chr1	15764937	15773153	+	N	N	N	N	II1	e0	-4.68	-5.97	-1.29	0.0509665	0.0710613	0.0151385	0.759734	0.630871	0.951067	6.87485	6.92581	6.94591	6.88999
CELA2A	chymotrypsin-like elastase family, member 2A	63036	HGNC:24609|MIM:609443|Ensembl:ENSG00000142615|HPRD:06495|Vega:OTTHUMG00000002258	ELA2A|PE-1	NM_033440	CACGGCATCGTCAGCTTCGGGTCTCGCCTCGGCTGCAACTACTACCACAA	chr1	15783222	15798586	+	N	N	N	N	II1	e0	-2.83	-5.58	-2.75	-0.151065	-0.0255341	-0.0463869	0.189557	0.900356	0.824977	6.8578	6.70674	6.83227	6.81142
CELA2B	chymotrypsin-like elastase family, member 2B	51032	HGNC:29995|MIM:609444|Ensembl:ENSG00000215704|HPRD:06496|Vega:OTTHUMG00000002259	ELA2B	NM_015849	CCGTGAAGACGAATATGATCTGTGCTGGGGGTGATGGCGTGATATGCACC	chr1	15802595	15817895	+	N	N	N	N	II1	e0	-6.48	-6.34	0.14	0.00833414	0.014569	0.0369895	0.965904	0.935693	0.829875	6.73213	6.74047	6.7467	6.76912
CASP9	caspase 9, apoptosis-related cysteine peptidase	842	HGNC:1511|MIM:602234|Ensembl:ENSG00000132906|HPRD:03756|Vega:OTTHUMG00000002256	APAF-3|APAF3|ICE-LAP6|MCH6|PPP1R56	NM_001278054	GGCCAGGTCACCCTTTGCTGTGAGGCTGTCCTGTACATTGTGGGATGTTC	chr1	15817895	15850940	-	N	N	N	N	II1	e0	-4.58	-3.65	0.93	-0.24688	0.394399	0.341094	0.0105022	0.000302433	0.00114387	7.72921	7.48233	8.12361	8.0703
DNAJC16	DnaJ (Hsp40) homolog, subfamily C, member 16	23341	HGNC:29157|Ensembl:ENSG00000116138|HPRD:17202|Vega:OTTHUMG00000002358	-	NM_001287811	GGAAGCCATAGGGTCGTGCAGTGATGTTGACTCTTCCCTCTACCTGGGTG	chr1	15853307	15898228	+	N	N	N	N	II1	e0	-3.82	-4.93	-1.11	-0.1108	-0.149152	-0.0839478	0.411582	0.219865	0.617764	6.96523	6.85443	6.81607	6.88128
AGMAT	agmatine ureohydrolase (agmatinase)	79814	HGNC:18407|HPRD:12436	-	NM_024758	GCTTCTCCTATGAGGTGCTTAGGGCTGCATCTTGGTTTTAGGACCACTGT	chr1	15898193	15911605	-	N	N	N	N	II1	e0	-4.1	-5.46	-1.36	0.00845208	0.0184583	0.0460611	0.970849	0.929625	0.816857	6.65666	6.66511	6.67512	6.70272
DDI2	DNA-damage inducible 1 homolog 2 (S. cerevisiae)	84301	HGNC:24578|HPRD:18702	RP4-680D5.5	NM_032341	GGGGCTGGAAGAGAGGATGTACGGCCAGAGGAGATTGCAGACCAAGAATT	chr1	15943952	15987552	+	N	N	N	N	II1	e0	-5.29	-5.72	-0.43	0.0561693	0.0636302	0.0793079	0.754795	0.709442	0.648985	6.89367	6.94984	6.9573	6.97297
RSC1A1	regulatory solute carrier protein, family 1, member 1	6248	HGNC:10458|MIM:601966|Ensembl:ENSG00000215695|HPRD:15994|Vega:OTTHUMG00000067830	RS1	NM_006511	ATTGACCGCATTCTCCGTGCTGGCTTTACTTTGCAGGAAGCTCTTGGAGC	chr1	15986363	15988217	+	N	N	N	N	II1	e1	-4.56	-5.89	-1.33	0.572053	0.255673	0.325761	2.70164e-05	0.0178624	0.0038953	7.06255	7.6346	7.31822	7.38831
PLEKHM2	pleckstrin homology domain containing, family M (with RUN domain) member 2	23207	HGNC:29131|MIM:609613|Ensembl:ENSG00000116786|Vega:OTTHUMG00000003062	RP11-169K16.1|SKIP	NM_015164	GCCTGGCATCCATGTTGACATCTTCTGACTGTCCCCTGCTTGGCTGGAGC	chr1	16010826	16061264	+	N	N	N	N	II1	e0	-5.9	-6.16	-0.26	0.236901	0.285015	0.265124	0.481504	0.364598	0.451594	9.6788	9.9157	9.96381	9.94392
SLC25A34	solute carrier family 25, member 34	284723	HGNC:27653|MIM:610817|Ensembl:ENSG00000162461|HPRD:17340|Vega:OTTHUMG00000003063	RP11-169K16.2	NM_207348	CCAAGTCTGTAAGGGCCGCTCCCAGGAACACCTGCTACTGCACACTCCAA	chr1	16062808	16067884	+	N	N	N	N	II1	e0	-8.02	-8.84	-0.82	0.191405	0.0375827	0.0540987	0.271892	0.898728	0.868096	7.14094	7.33234	7.17852	7.19504
TMEM82	transmembrane protein 82	388595	HGNC:32350|Ensembl:ENSG00000162460|HPRD:18383|Vega:OTTHUMG00000003065	-	NM_001013641	TGGAGTCTGTCTCAAGCCCACTAGCCTGATCTCCGAGGCCTTGACCCCAG	chr1	16068986	16074292	+	N	N	N	N	II1	e0	-6.34	-6.44	-0.1	0.027067	0.010856	0.0894904	0.898107	0.962205	0.559279	6.79988	6.82695	6.81074	6.88937
FBLIM1	filamin binding LIM protein 1	54751	HGNC:24686|MIM:607747|Ensembl:ENSG00000162458|HPRD:09669|Vega:OTTHUMG00000003079	CAL|FBLP-1|FBLP1	NM_017556	ACGGGCGGAGGGGACGGGAGGCCCAGCGGCTCCGGGCTCCGCTGGCTCGG	chr1	16085254	16113084	+	N	N	N	N	II1	e0	-6.21	-5.15	1.06	0.0561443	0.118398	0.0606593	0.788169	0.446677	0.793753	6.81221	6.86835	6.93061	6.87287
UQCRHL	ubiquinol-cytochrome c reductase hinge protein-like	440567	-	-	NM_001089591	GTAACTGTAAGTTCACATGAACCTCGTGGGTTTTGGCTTAGGCTGGTAGC	chr1	16133656	16134194	-	N	N	N	N	II1	e0	-1.96	-2.96	-1	-0.379572	-0.301139	-0.221319	0.00320787	0.0160573	0.089194	12.6231	12.2436	12.322	12.4018
SPEN	spen homolog, transcriptional regulator (Drosophila)	23013	HGNC:17575|MIM:613484|Ensembl:ENSG00000065526|HPRD:10230|Vega:OTTHUMG00000009376	HIAA0929|MINT|RBM15C|SHARP	NM_015001	TGCCCACTCATTTGTATAAGTGCGCTTCGGTACAGCACGGGTCCTGCTCC	chr1	16174358	16266950	+	N	N	N	N	II1	e0	-5.99	-6.14	-0.15	0.238629	0.039398	0.0125256	0.190455	0.902936	0.976236	10.0415	10.2801	10.0809	10.054
ZBTB17	zinc finger and BTB domain containing 17	7709	HGNC:12936|MIM:604084|Ensembl:ENSG00000116809|HPRD:04968|Vega:OTTHUMG00000009377	MIZ-1|ZNF151|ZNF60|pHZ-67	NM_003443	CTCACATCCTCTACGCCTGTGACTCCTGTGGGGACAAGTTTCTGGATGCC	chr1	16268363	16302627	-	N	N	N	N	II1	e1	-6.83	-6.58	0.25	0.564171	0.321877	0.342454	0.000109663	0.00962187	0.00700043	8.84525	9.40942	9.16713	9.1877
C1orf64	chromosome 1 open reading frame 64	149563	HGNC:28339|HPRD:14492	ERRF|RP11-5P18.4	NM_178840	GATCCGCTAAGGGGCATCTGAAACATCCGTCGAGTGGCAGAGGCAGGATA	chr1	16330730	16333184	+	N	N	N	N	II1	e0	-6.49	-5.15	1.34	0.141109	0.0665577	0.0471321	0.293714	0.715773	0.841112	6.85703	6.99814	6.92359	6.90416
HSPB7	heat shock 27kDa protein family, member 7 (cardiovascular)	27129	HGNC:5249|MIM:610692|Ensembl:ENSG00000173641|HPRD:13684|Vega:OTTHUMG00000009531	cvHSP	NM_014424	GCCTTAACCCTGGGAAATGCCTGCTGCCCCCAGTGACTCTTGGTTTCGTC	chr1	16340522	16345285	-	N	N	N	N	II1	e0	-9.04	-8.21	0.83	-0.128255	-0.0271672	-0.0397351	0.26423	0.887539	0.847569	6.70846	6.5802	6.68129	6.66872
CLCNKA	chloride channel, voltage-sensitive Ka	1187	HGNC:2026|MIM:602024|Ensembl:ENSG00000186510|HPRD:03608|Vega:OTTHUMG00000009529	CLCK1|ClC-K1|hClC-Ka	NM_004070	CCTCTGGGGTTGTCTGGTTCCCAGTGAGAGGCTCCTGAGAAAAATAAAGC	chr1	16348485	16360545	+	N	N	N	N	II1	e0	-6.18	-4.33	1.85	-0.0392241	-0.0182085	0.0341067	0.83475	0.932385	0.879186	6.79454	6.75531	6.77633	6.82864
CLCNKB	chloride channel, voltage-sensitive Kb	1188	HGNC:2027|MIM:602023|Ensembl:ENSG00000184908|HPRD:03607|Vega:OTTHUMG00000009530	CLCKB|ClC-K2|ClC-Kb	NM_001165945	CCTGAAGCTGTCCCCAGAGACTTCCCTGCATGAGGCACACAACCTCTTTG	chr1	16375256	16383821	+	N	N	N	N	II1	e0	-6.11	-5.45	0.66	-0.0483814	-0.0481236	0.0423159	0.742404	0.742971	0.811412	6.70649	6.65811	6.65837	6.74881
FAM131C	family with sequence similarity 131, member C	348487	HGNC:26717|Ensembl:ENSG00000185519|HPRD:08779|Vega:OTTHUMG00000009525	C1orf117|RP11-5P18.9	NM_182623	CACTTCTGGTAGCTAAGCACCTGCTCCCCGGCTCTCTTCACCCAGGACAT	chr1	16384263	16400127	-	N	N	N	N	II1	e0	-8.39	-5.3	3.09	-0.0663551	-0.0854757	-0.0538099	0.595547	0.453334	0.727675	6.79126	6.72491	6.70578	6.73745
EPHA2	EPH receptor A2	1969	HGNC:3386|MIM:176946|Ensembl:ENSG00000142627|HPRD:01494|Vega:OTTHUMG00000009527	ARCC2|CTPA|CTPP1|CTRCT6|ECK	NM_004431	GGCCCAGCGCCAAGTAAACAGGGTACCTCAAGCCCCATTTCCTCACACTA	chr1	16450831	16482582	-	N	N	N	N	II1	e0	-7.92	-4.91	3.01	-0.0670644	-0.0944549	-0.151127	0.683974	0.516157	0.233754	6.89211	6.82505	6.79766	6.74099
ARHGEF19	Rho guanine nucleotide exchange factor (GEF) 19	128272	HGNC:26604|MIM:612496|Ensembl:ENSG00000142632|HPRD:10659|Vega:OTTHUMG00000002219	WGEF	NM_153213	GACTGGGGCCCTCTCCTTTCTATGTCCTCAATCCTGCCTGACTCTTGGTC	chr1	16524598	16539104	-	N	N	N	N	II1	e0	-7.8	-6.92	0.88	0.167556	0.222825	0.110152	0.472489	0.287798	0.725804	7.95062	8.11818	8.17345	8.06077
RSG1	REM2 and RAB-like small GTPase 1	79363	HGNC:28127|Ensembl:ENSG00000132881|HPRD:14399|Vega:OTTHUMG00000002214	C1orf89	NM_030907	TCCCGTGGCCTTTCCCCCTTTGGCAGCACCGATGGAGGATGACTGGGAGA	chr1	16558181	16563659	-	N	N	N	N	II1	e0	-7.76	-9.38	-1.62	0.0838581	0.0898475	0.0922699	0.548119	0.515743	0.534111	6.93909	7.02294	7.02893	7.03136
FBXO42	F-box protein 42	54455	HGNC:29249|MIM:609109|Ensembl:ENSG00000037637|Vega:OTTHUMG00000002218	Fbx42|JFK	NM_018994	GTTGCAAAGGTGGAGGGTTTTAGACTCTCATGCTTCAGGTGCTGTCGGGG	chr1	16576558	16678948	-	N	N	N	N	II1	e0	-3.81	-4.36	-0.55	-0.0618533	0.0132074	0.0239166	0.810556	0.967225	0.945771	7.38586	7.324	7.39907	7.40977
SZRD1	SUZ RNA binding domain containing 1	26099	HGNC:30232|Ensembl:ENSG00000055070|HPRD:13213|Vega:OTTHUMG00000002217	C1orf144	NM_001114600	TGGCTTGAACTCTTAGGGGTCTGCAGTGCTCCATCTCCATTGGTGGCCCC	chr1	16693524	16724643	+	N	N	N	N	II1	e1	-5.71	-7.38	-1.67	0.607949	0.736841	0.696563	0.00914935	0.00242901	0.0041643	9.65513	10.2631	10.392	10.3517
SPATA21	spermatogenesis associated 21	374955	HGNC:28026|Ensembl:ENSG00000187144|HPRD:14190|Vega:OTTHUMG00000002312	spergen-2|spergen2	NM_198546	TGCTCTGCCCACAGCTGGACAAGAAGATGGTCCGTAGGCAGCCGAGCAAC	chr1	16725137	16763919	-	N	N	N	N	II1	e0	-4.91	-4.61	0.3	0.017166	0.0392621	0.0507152	0.93444	0.822234	0.789062	6.59398	6.61114	6.63324	6.64469
NECAP2	NECAP endocytosis associated 2	55707	HGNC:25528|MIM:611624|Ensembl:ENSG00000157191|HPRD:07674|Vega:OTTHUMG00000002313	-	NM_001145277	TGTTGTCATGGAGCTGTGGGAGTTGGCACTCTGTCTGCTGGTGGCCCTCT	chr1	16767166	16786584	+	N	N	N	N	II1	e1	-5.52	-6.4	-0.88	-0.0147479	0.535741	0.492606	0.954776	0.000200085	0.000452295	9.3969	9.38215	9.93264	9.8895
CROCCP3	ciliary rootlet coiled-coil, rootletin pseudogene 3	114819	HGNC:29405|Ensembl:ENSG00000080947	CROCCL2|dJ798A10.2	NR_023386	GATGTCCACCATGTCCTTCTGTGGTACACCCCTTCAGTTAAGCCAGGAGG	chr1	16793930	16819196	-	N	N	N	N	II1	e0	-4.48	-7.16	-2.68	-0.139768	-0.0849809	-0.0449007	0.254434	0.576838	0.837126	7.03494	6.89517	6.94995	6.99004
NBPF1	neuroblastoma breakpoint family, member 1	55672	HGNC:26088|MIM:610501|Ensembl:ENSG00000219481|HPRD:07946|Vega:OTTHUMG00000002487	AB13|AB14|AB23|AD2|NBG|NBPF	NM_017940	ATGCCGCTGACTCCCACTGTCCAGGGCTTCCAGTGGATTCTCCGAGGCCC	chr1	16888921	16940100	-	N	N	N	N	II1	e0	-5.57	-4.47	1.1	0.401071	0.488625	0.383008	0.0175875	0.00503359	0.0264412	7.56675	7.96783	8.05538	7.94976
CROCCP2	ciliary rootlet coiled-coil, rootletin pseudogene 2	84809	HGNC:28170|Ensembl:ENSG00000215908	CROCCL1	NR_026752	GCCGTCGGTCTTGTCCCGCAGGCACTGGCCAACATGGCGAAACCCCATCT	chr1	16944750	16957401	-	N	N	N	N	II1	e0	-6.61	-5.12	1.49	0.0633773	-0.158543	-0.17322	0.847148	0.500862	0.48046	7.405	7.46837	7.24645	7.23178
FAM231A	UPF0627 protein ENSP00000341061/ENSP00000339743	729574	Ensembl:ENSG00000237847	-	NM_001282321	CAGAGCTCAGAGGGCAGGCCCCCGAGCAAGCAGAGAGGAGGGCACCTTTT	chr1	16999497	17000007	+	N	N	N	N	II1	e0	-1.89	-4.98	-3.09	0.00853794	0.120293	-0.00410513	0.968228	0.270006	0.986449	6.68354	6.69208	6.80383	6.67943
ESPNP	espin pseudogene	284729	HGNC:23285|Ensembl:ENSG00000268869	RP1-163M9.1|dJ1182A14.1	NR_026567	ATGGAGCACTGCGTGCTCTCCCGGGATCCATCCGTGGAGCTGGAGGCGAA	chr1	17017712	17046652	-	N	N	N	N	II1	e0	-8.05	-4.45	3.6	0.103159	0.0462102	0.000465779	0.349627	0.759085	0.997948	6.69727	6.80043	6.74348	6.69773
MST1L	macrophage stimulating 1-like	11223	HGNC:7390	BRF-1|D1F15S1A|MSPL-7|MSPL7|MST1P9|MSTP7|MSTP9	NM_001271733	TGGACACAGAGGACCTGCACACCAGAGACAGAGGTCCGCATTAAGTGTGG	chr1	17081128	17090975	-	N	N	N	N	II1	e0	-7.35	-5.62	1.73	-0.067041	0.0113712	-0.0343668	0.704213	0.964004	0.890857	6.66727	6.60023	6.67865	6.63291
CROCC	ciliary rootlet coiled-coil, rootletin	9696	HGNC:21299|Ensembl:ENSG00000058453|HPRD:16758|Vega:OTTHUMG00000002200	ROLT	NM_014675	TTGTCTCTGGTCAGCCCTGGAGCATGGGATCGTGGGAAAGAGGAGGGGGA	chr1	17248444	17299474	+	N	N	N	N	II1	e0	-7.06	-5.14	1.92	-0.284038	-0.195472	-0.19718	0.00587303	0.0557565	0.0589374	7.17911	6.89507	6.98364	6.98193
MFAP2	microfibrillar-associated protein 2	4237	HGNC:7033|MIM:156790|Ensembl:ENSG00000117122|HPRD:01137|Vega:OTTHUMG00000002290	MAGP|MAGP-1|MAGP1	NM_001135248	ACAGTGGCTTAGGCCAGGGTGGGAGCAGTGAACGGAGTCACAAAAGAAAT	chr1	17300998	17307173	-	N	N	N	N	II1	e0	-9.18	-8.17	1.01	0.132361	0.0351375	0.0384075	0.569177	0.916793	0.920749	6.69331	6.82567	6.72845	6.73172
ATP13A2	ATPase type 13A2	23400	HGNC:30213|MIM:610513|Ensembl:ENSG00000159363|HPRD:13677|Vega:OTTHUMG00000002293	CLN12|HSA9947|KRPPD|PARK9	NM_001141973	AACACCACCGCCACCACCTCCCACATCCCTGAGGTTGGCGACTGTCTACA	chr1	17312452	17338423	-	N	N	N	N	II1	e0	-7.49	-6.19	1.3	-0.0419276	-0.121792	-0.0734814	0.905782	0.634499	0.832944	7.56196	7.52003	7.44017	7.48848
SDHB	succinate dehydrogenase complex, subunit B, iron sulfur (Ip)	6390	HGNC:10681|MIM:185470|Ensembl:ENSG00000117118|HPRD:01707|Vega:OTTHUMG00000002289	CWS2|IP|PGL4|SDH|SDH1|SDH2|SDHIP	NM_003000	CCTGGCCAAGCTGCAGGACCCATTCTCTCTATACCGCTGCCACACCATCA	chr1	17345224	17380665	-	N	N	N	N	II1	e0	-5.09	-5.24	-0.15	-0.00135206	-0.00851512	0.0282542	0.994632	0.970403	0.909425	11.541	11.5397	11.5325	11.5693
PADI2	peptidyl arginine deiminase, type II	11240	HGNC:18341|MIM:607935|Ensembl:ENSG00000117115|HPRD:06396|Vega:OTTHUMG00000002295	PAD-H19|PAD2|PDI2	NM_007365	CGCTGGGAGACCTTTGGGACGTGGGGTGGAATTTGGGGTATCTGTGCCTT	chr1	17393255	17445948	-	N	N	N	N	II1	e0	-5.36	-3.44	1.92	0.223826	0.0263774	0.0242782	0.160819	0.931852	0.945771	6.89938	7.1232	6.92575	6.92365
PADI1	peptidyl arginine deiminase, type I	29943	HGNC:18367|MIM:607934|Ensembl:ENSG00000142623|HPRD:06395|Vega:OTTHUMG00000002294	HPAD10|PAD1|PDI|PDI1	NM_013358	AATGCACCTCATTCTTCCCTGGCCTCTTTCCCACCCACAGCCCCCAGAGG	chr1	17531620	17572501	+	N	N	N	N	II1	e0	-5.16	-6.84	-1.68	-0.0101487	0.049002	0.0302294	0.951982	0.682288	0.852469	6.69685	6.6867	6.74585	6.72708
PADI3	peptidyl arginine deiminase, type III	51702	HGNC:18337|MIM:606755|Ensembl:ENSG00000142619|HPRD:08419|Vega:OTTHUMG00000002373	PAD3|PDI3	NM_016233	CCTCTGGATTGGTCTCAGGCTCTCTGTTGGCCTTTGGTCAGCGTTTCCAC	chr1	17575592	17610727	+	N	Y	N	N	II1	e0	-2.03	-3.88	-1.85	-0.0777317	0.0110928	-0.0725756	0.475148	0.951674	0.557896	6.80878	6.73105	6.81987	6.7362
PADI4	peptidyl arginine deiminase, type IV	23569	HGNC:18368|MIM:605347|Ensembl:ENSG00000159339|HPRD:05635|Vega:OTTHUMG00000002371	PAD|PAD4|PADI5|PDI4|PDI5	NM_012387	GTCCCAGTTTCCCACTCTGAAGATCCCAACATGGTCCTAGCACTGCACAC	chr1	17634689	17690495	+	N	N	N	N	II1	e0	-4.29	-2.83	1.46	0.0331395	0.128912	0.154214	0.892096	0.393663	0.304858	6.73155	6.76469	6.86046	6.88576
PADI6	peptidyl arginine deiminase, type VI	353238	HGNC:20449|MIM:610363|HPRD:15095	hPADVI	NM_207421	AGAGGTCCTTTGCGAGGCCATACTTCCCTGACCTGTTGCGGATGATTGTG	chr1	17698690	17728195	+	N	N	N	N	II1	e0	-5.23	-3.99	1.24	-0.0404217	-0.0911818	-0.0130569	0.844621	0.555927	0.962661	6.62488	6.58445	6.53369	6.61182
RCC2	regulator of chromosome condensation 2	55920	HGNC:30297|MIM:609587|Ensembl:ENSG00000179051|HPRD:18171|Vega:OTTHUMG00000002513	TD-60	NM_001136204	GTTGGGAATGTGCTTGGCGCTGACCCTGCGGGCATCTGACTGGTCTTCCA	chr1	17733250	17765059	-	N	N	N	N	II1	e0	-7.71	-7.26	0.45	0.0118442	0.104549	0.163196	0.97522	0.683046	0.483737	12.2459	12.2578	12.3505	12.4091
ARHGEF10L	Rho guanine nucleotide exchange factor (GEF) 10-like	55160	HGNC:25540|MIM:612494|Ensembl:ENSG00000074964|HPRD:07679|Vega:OTTHUMG00000002514	GrinchGEF	NM_018125	GTGTTTTGGGGAGGAGTTTTAGGGCTTGGGGAGAGGGAGGACACATCTGG	chr1	17866329	18024370	+	N	N	N	N	II1	e0	-5.27	-4.05	1.22	0.106477	-0.0494732	-0.0765038	0.585309	0.843652	0.765309	6.83413	6.94061	6.78466	6.75763
ACTL8	actin-like 8	81569	HGNC:24018|Ensembl:ENSG00000117148|HPRD:11274|Vega:OTTHUMG00000002512	CT57	NM_030812	GCAGGGGACAGTTTTTCCAGGGTGGCCTATCATTGGGGTATGAGTGGCTG	chr1	18081807	18153558	+	N	N	N	N	II1	e0	-3.71	-3.73	-0.02	-0.208637	-0.1902	-0.167641	0.273848	0.338737	0.462035	6.97628	6.76765	6.78608	6.80864
IGSF21	immunoglobin superfamily, member 21	84966	HGNC:28246|Ensembl:ENSG00000117154|HPRD:11309|Vega:OTTHUMG00000002432	-	NM_032880	ACCTTGGTGCTCGCCCTGACAGTGATTCTGGAGCTGACGTGAAGGCACCC	chr1	18434239	18704977	+	N	N	N	N	II1	e0	-3.47	-2.54	0.93	-0.0242856	-0.00483031	-0.068916	0.904734	0.982088	0.67225	6.66513	6.64084	6.6603	6.59621
KLHDC7A	kelch domain containing 7A	127707	HGNC:26791|Ensembl:ENSG00000179023|HPRD:08246|Vega:OTTHUMG00000002431	RP11-422P22.2	NM_152375	GCAATCACAATTCTAGGAGCCAGTTGACCCCAGCAGCCCCTCGCTAGTTG	chr1	18807423	18812480	+	N	N	N	N	II1	e0	-7.67	-5.62	2.05	0.0286774	-0.0196443	-0.000400453	0.906628	0.938419	0.998597	6.791	6.81967	6.77135	6.7906
PAX7	paired box 7	5081	HGNC:8621|MIM:167410|Ensembl:ENSG00000009709|HPRD:01331|Vega:OTTHUMG00000002433	HUP1|PAX7B|RMS2	NM_013945	CCCATTCCTTCTCCCACCCCCAGGGCCTCCTGCTTGTTTATGGAGAGCTA	chr1	18957499	19062632	+	N	N	N	N	II1	e0	-6.35	-6.09	0.26	-0.0130318	-0.0259657	0.0266218	0.949947	0.8887	0.903684	6.83872	6.82569	6.81275	6.86534
TAS1R2	taste receptor, type 1, member 2	80834	HGNC:14905|MIM:606226|Ensembl:ENSG00000179002|HPRD:06940|Vega:OTTHUMG00000002442	GPR71|T1R2|TR2	NM_152232	ACAATGTCCAGCCGGTGCTCTACTTCCTGGCACACGAGGACAACCTCCTT	chr1	19166092	19186155	-	N	N	N	N	II1	e0	-7.09	-5.32	1.77	0.0823994	-0.00284204	-0.0407989	0.536753	0.989002	0.838749	6.81366	6.89606	6.81082	6.77287
ALDH4A1	aldehyde dehydrogenase 4 family, member A1	8659	HGNC:406|MIM:606811|Ensembl:ENSG00000159423|HPRD:06009|Vega:OTTHUMG00000002443	ALDH4|P5CD|P5CDh	NM_170726	GCAGGTGGCTGGGTGGGGGCACAGGCTGGAGTATTCTTAGTTCTACTGGT	chr1	19197923	19229293	-	N	N	N	N	II1	e0	-6.46	-5.43	1.03	0.0251275	0.1012	0.17353	0.926351	0.592056	0.27782	6.96517	6.9903	7.06637	7.1387
IFFO2	intermediate filament family orphan 2	126917	HGNC:27006|Ensembl:ENSG00000169991|Vega:OTTHUMG00000002499	-	NM_001136265	GGGTGGGCTGTGTGTTAGTTCTGAGCAAATCCCTCACCAAGACCCTTCCC	chr1	19230773	19282826	-	N	N	N	N	II1	e0	-7.35	-4.99	2.36	0.00905147	-0.0887031	0.0186707	0.967158	0.484836	0.934557	7.05686	7.06592	6.96816	7.07553
UBR4	ubiquitin protein ligase E3 component n-recognin 4	23352	HGNC:30313|MIM:609890|Ensembl:ENSG00000127481|HPRD:10184|Vega:OTTHUMG00000002498	RBAF600|ZUBR1|p600	NM_020765	GGTCCTGCTCTCTCGCTGAGTACATCCGCCACAACGACATGCCCATCTAC	chr1	19400999	19536746	-	N	N	N	N	II1	e0	-4.63	-4.39	0.24	-0.226434	-0.0285451	-0.017139	0.250829	0.938419	0.968982	10.0251	9.79862	9.99651	10.0079
EMC1	ER membrane protein complex subunit 1	23065	HGNC:28957|Ensembl:ENSG00000127463|HPRD:08306|Vega:OTTHUMG00000002497	KIAA0090|RP1-43E13.1	NM_015047	AGTAGACCATCTCTAGCCCTGTGGTGAAAGAGGTACACTCGAATGTTTGC	chr1	19542157	19578053	-	N	N	N	N	II1	e0	-5.81	-5.94	-0.13	0.329961	-0.159533	0.0174428	0.00627725	0.219079	0.951142	7.94328	8.27324	7.78375	7.96072
MRTO4	mRNA turnover 4 homolog (S. cerevisiae)	51154	HGNC:18477|Ensembl:ENSG00000053372|HPRD:12725|Vega:OTTHUMG00000002496	C1orf33|MRT4|dJ657E11.4	NM_016183	GGACCATCAGGACTGCTGCCGCCCCTCTGGAGAGAGCAGCTTTTTATTTG	chr1	19578074	19586622	+	N	N	N	N	II1	e1	-9.33	-7.06	2.27	0.692435	0.157284	0.242541	0.000292279	0.454775	0.197125	8.87838	9.57082	9.03567	9.12092
AKR7L	aldo-keto reductase family 7-like	246181	HGNC:24056|MIM:608478|Ensembl:ENSG00000211454|HPRD:12240|Vega:OTTHUMG00000002520	AFAR3|AFB1-AR3|AKR7A4	NR_040289	GTACTTGCCTAGGACTGGGAGGAGGATTGCGAGGAAATGGAGATTCACTG	chr1	19592475	19600568	-	N	N	N	N	II1	e0	-6.68	-2.17	4.51	-0.234518	-0.317515	-0.276212	0.0261347	0.00380193	0.0111118	7.1213	6.88678	6.80378	6.84509
AKR7A3	aldo-keto reductase family 7, member A3 (aflatoxin aldehyde reductase)	22977	HGNC:390|MIM:608477|HPRD:07089	AFAR2	NM_012067	CTTCCGCTAGGCCCATCGTTTCTCAGGCTGCCCAAGGCTCTTCTGTAACA	chr1	19609056	19615280	-	N	N	N	N	II1	e0	-3.94	-3.22	0.72	-0.215973	-0.351598	-0.292518	0.214402	0.0295336	0.0816949	9.28227	9.0663	8.93067	8.98975
AKR7A2	aldo-keto reductase family 7, member A2 (aflatoxin aldehyde reductase)	8574	HGNC:389|MIM:603418|HPRD:04567	AFAR|AFAR1|AFB1-AR1|AKR7	NM_003689	TACACTGTGAAAGGTGGGGGGTGAGTCCCACTTGAGCGCTTCCTGTTGAA	chr1	19629201	19638640	-	N	N	N	N	II1	e0	-5.4	-8.04	-2.64	-0.207318	-0.333927	-0.111697	0.496388	0.191687	0.803078	11.1922	10.9849	10.8583	11.0805
PQLC2	PQ loop repeat containing 2	54896	HGNC:26001|MIM:614760|Ensembl:ENSG00000040487|HPRD:17896|Vega:OTTHUMG00000002521	-	NM_001040126	CTGTCAACTCCAGACAACTGAATAAACAGGCCGGGTACAGTGGCTCGCAC	chr1	19638739	19655794	+	N	N	N	N	II1	e0	-5.01	-6.44	-1.43	-0.146475	-0.0492681	-0.0523601	0.264483	0.802883	0.817336	6.85583	6.70935	6.80656	6.80347
CAPZB	capping protein (actin filament) muscle Z-line, beta	832	HGNC:1491|MIM:601572|Ensembl:ENSG00000077549|HPRD:11872|Vega:OTTHUMG00000002556	CAPB|CAPPB|CAPZ	NM_001206541	CTTATTCCGTGTGTGTTTGGGAGTTGCTTGGGGTTGGGGGTCGTGGGGAC	chr1	19665266	19812135	-	N	N	N	N	II1	e0	-6.53	-6.28	0.25	-0.133884	-0.101564	-0.0201646	0.587986	0.71464	0.963574	9.55267	9.41878	9.4511	9.5325
MINOS1	mitochondrial inner membrane organizing system 1	440574	HGNC:32068|Ensembl:ENSG00000173436|Vega:OTTHUMG00000002712	C1orf151|MIO10	NR_033757	CAGGCGTGAGCCACCGCACCCAGCCTCCTATTTGCTTTAAAAGTAATTTC	chr1	19923470	19956315	+	N	N	N	N	II1	e0	-5.3	-6.11	-0.81	0.105701	0.174005	0.0976406	0.442585	0.133994	0.533106	6.74633	6.85203	6.92033	6.84397
RPS14P3	ribosomal protein S14 pseudogene 3	644068	HGNC:35797	RPS14_1_16	NR_077246	TATTAGCTGATTTTAAGGCTTGCAGTAAAGCTACAAGACAGTGTGGTGTT	chr1	19934300	19935138	+	N	N	N	N	II1	e0	-7.46	-11.67	-4.21	0.17712	0.0477399	0.0392707	0.143117	0.806958	0.872103	6.70745	6.88457	6.75519	6.74672
NBL1	neuroblastoma 1, DAN family BMP antagonist	4681	HGNC:7650|MIM:600613|Ensembl:ENSG00000158747|HPRD:09001|Vega:OTTHUMG00000002700	D1S1733E|DAN|DAND1|NB|NO3	NM_001204085	CCCATGAAGAAAGCCCCTCGTTGCCCAGCACTGTCTGCGTCTGCTCTTCT	chr1	19971865	19984949	+	N	N	N	N	II1	e0	-4.65	-4.63	0.02	-0.0802645	0.337073	0.279916	0.735221	0.0261689	0.0743652	7.30028	7.22002	7.63735	7.5802
HTR6	5-hydroxytryptamine (serotonin) receptor 6, G protein-coupled	3362	HGNC:5301|MIM:601109|Ensembl:ENSG00000158748|HPRD:03066|Vega:OTTHUMG00000002713	5-HT6|5-HT6R	NM_000871	GAACTGACCCGGGCTTGGGGCTGGCCAATGGGGAGCTGGATTGAGCAGAA	chr1	19991779	20007459	+	N	N	N	N	II1	e0	-5.83	-5.81	0.02	0.00313929	-0.0891871	-0.0676797	0.989411	0.573858	0.731264	6.80936	6.8125	6.72017	6.74168
TMCO4	transmembrane and coiled-coil domains 4	255104	HGNC:27393|Ensembl:ENSG00000162542|HPRD:14140|Vega:OTTHUMG00000002697	RP5-1056L3.6	NM_181719	GGCACCATCAACTGGCAGCAACAGAGCAGGCGCAGGTACAAAGAAGGCAG	chr1	20008705	20126410	-	N	Y	N	Y	IP1	e0	-4.32	-2.83	1.49	-0.00275791	-0.0244229	-0.0165253	0.989052	0.894655	0.943015	6.67264	6.66988	6.64822	6.65611
RNF186	ring finger protein 186	54546	HGNC:25978|Ensembl:ENSG00000178828|HPRD:07885|Vega:OTTHUMG00000002709	RP11-91K11.1	NM_019062	AGGGGTTACGGACTAAGACTGGCTCCTTTGGGAAATCACATGCCAGCGGG	chr1	20140521	20141771	-	N	N	N	N	II1	e0	-9.31	-1.54	7.77	0.0342805	0.0508447	-0.0466035	0.904439	0.838759	0.87884	6.90806	6.94234	6.9589	6.86145
OTUD3	OTU domain containing 3	23252	HGNC:29038|MIM:611758|Ensembl:ENSG00000169914|Vega:OTTHUMG00000002696	DUBA4|RP11-460G22.1	NM_015207	GTCAGTCTCCTTTACAGAGGGGTGGATGTATCCGTGGAGGAGGGGCCTTC	chr1	20208887	20239437	+	N	N	N	N	II1	e0	-7.15	-7.02	0.13	-0.167921	-0.226069	-0.184266	0.291207	0.122727	0.263116	7.46296	7.29504	7.23689	7.27869
PLA2G2E	phospholipase A2, group IIE	30814	HGNC:13414|HPRD:07143	GIIE sPLA2|sPLA2-IIE	NM_014589	GGCTGCCCTCTGCTTTCGCCGCAACCTGGGCACCTACAACCGCAAATATG	chr1	20246799	20250110	-	N	N	N	N	II1	e0	-8.84	-9.35	-0.51	-0.0988781	-0.0949189	-0.075121	0.402449	0.433145	0.610625	6.75432	6.65544	6.6594	6.6792
PLA2G2A	phospholipase A2, group IIA (platelets, synovial fluid)	5320	HGNC:9031|MIM:172411|Ensembl:ENSG00000188257|HPRD:01397|Vega:OTTHUMG00000002699	MOM1|PLA2|PLA2B|PLA2L|PLA2S|PLAS1|sPLA2	NM_000300	ATGCAGAAAGCATCCCTCACCCATCCTAGAGGCCAGGCAGGAGCCCTTCT	chr1	20301923	20306932	-	N	N	N	N	II1	e0	-8.02	-4.24	3.78	-0.0828121	-0.0470051	-0.0729181	0.592018	0.803202	0.691465	6.83185	6.74904	6.78485	6.75894
PLA2G5	phospholipase A2, group V	5322	HGNC:9038|MIM:601192|HPRD:03117	FRFB|GV-PLA2|PLA2-10|hVPLA(2)	NM_000929	AGGCTCCTAAGTCACAGACCTCAGTCTTTCTCGAAGCTTGGCGGACCCCC	chr1	20396700	20418394	+	N	N	N	N	II1	e0	-1.3	-3.85	-2.55	-0.0263823	-0.0399733	-0.0897422	0.898345	0.822237	0.543203	6.79912	6.77274	6.75915	6.70938
PLA2G2D	phospholipase A2, group IID	26279	HGNC:9033|MIM:605630|HPRD:07546	PLA2IID|SPLASH|sPLA2-IID|sPLA2S	NM_012400	CACTTGGACCTGGGAGGCAGAGGTTTCAGTGAGCCCAGATCGCGACACTG	chr1	20439142	20446059	-	N	N	N	N	II1	e0	-0.01	0.55	0.56	0.316027	0.291516	0.142582	0.134949	0.180746	0.655451	7.86626	8.18229	8.15778	8.00884
PLA2G2F	phospholipase A2, group IIF	64600	HGNC:30040|Ensembl:ENSG00000158786|HPRD:07499|Vega:OTTHUMG00000002704	-	NM_022819	TTTCCAGAGCCCCAGCCTTGGAGACAAGGACACTGCCACCCAGCGCCACA	chr1	20465822	20476879	+	N	N	N	N	II1	e0	-4.12	-3.89	0.23	-0.0392434	-0.0111709	0.034607	0.863516	0.966233	0.896616	6.72776	6.68852	6.71659	6.76237
PLA2G2C	phospholipase A2, group IIC	391013	HGNC:9032|Ensembl:ENSG00000187980	-	NM_001105572	GTTTCTGGCAGTTTCAGAGGAGGGTCAAACACATCACGGGGCGAAGTGCC	chr1	20490483	20501687	-	N	N	N	N	II1	e0	-3.71	-7.19	-3.48	-0.0827657	-0.0135314	-0.0369763	0.773911	0.970319	0.925348	6.93223	6.84947	6.9187	6.89526
UBXN10	UBX domain protein 10	127733	HGNC:26354|HPRD:18255	UBXD3	NM_152376	GAGGCTGGGGGAAGAGCCTCCCATAAAATCACACCTACTCTGTGGTAAGA	chr1	20512577	20519942	+	N	N	N	N	II1	e0	-5.57	-8.69	-3.12	0.0785032	0.261221	0.16665	0.685443	0.0461016	0.277068	6.69648	6.77499	6.9577	6.86313
VWA5B1	von Willebrand factor A domain containing 5B1	127731	HGNC:26538|Ensembl:ENSG00000158816|HPRD:08732|Vega:OTTHUMG00000002835	-	NM_001039500	TTGCCATATTGCCCGGGCTGGTCTTGAACTCCTGGGCTCAAGCGATCTGC	chr1	20617411	20681387	+	N	N	N	N	II1	e0	-5.23	-5.47	-0.24	0.109549	0.0560106	0.0227184	0.395279	0.740209	0.925017	6.7417	6.85125	6.79772	6.76442
CAMK2N1	calcium/calmodulin-dependent protein kinase II inhibitor 1	55450	HGNC:24190|MIM:614986|Ensembl:ENSG00000162545|HPRD:13112|Vega:OTTHUMG00000002837	PRO1489|RP11-401M16.1	NM_018584	TATGACCGACAAGGCACCTCCTGGTGTCTAACTCCCCCAAAGACAATGAG	chr1	20808883	20812728	-	N	N	N	N	II1	e0	-2.17	-1.65	0.52	-0.406846	-0.45572	-0.341005	0.00744721	0.00349343	0.0259332	8.55837	8.15153	8.10265	8.21737
MUL1	mitochondrial E3 ubiquitin protein ligase 1	79594	HGNC:25762|MIM:612037|Ensembl:ENSG00000090432|HPRD:07799|Vega:OTTHUMG00000002838	C1orf166|GIDE|MAPL|MULAN|RNF218|RP11-401M16.2	NM_024544	CTGAATGTTCATCTCTCGTCCTCCTTTGTGCAGGCGAGGAAGGGGTGCCC	chr1	20825940	20834674	-	N	N	N	N	II1	e0	-5.07	-5.87	-0.8	0.490976	0.447999	0.353696	0.130192	0.181206	0.36809	9.26023	9.7512	9.70822	9.61392
FAM43B	family with sequence similarity 43, member B	163933	HGNC:31791|Ensembl:ENSG00000183114|HPRD:16881|Vega:OTTHUMG00000057491	-	NM_207334	TCCTCAGAGCAGGTGGGTCCTGACAGCAGTGGATTCTCCCAGCAGGATGA	chr1	20878931	20881513	+	N	N	N	N	II1	e0	-1.96	-2.09	-0.13	-0.0756933	-0.0642589	-0.00547977	0.711197	0.763874	0.987012	6.86198	6.78629	6.79772	6.8565
CDA	cytidine deaminase	978	HGNC:1712|MIM:123920|Ensembl:ENSG00000158825|HPRD:11744|Vega:OTTHUMG00000002845	CDD	NM_001785	TGAGTCAGCACCCCTCCTAGCAACCTGCCTTGGGACTTAGAACACCGCCG	chr1	20915443	20945400	+	N	N	N	N	II1	e0	-3.24	-4.11	-0.87	0.0768357	0.0191297	-0.0532385	0.72658	0.948812	0.852315	6.77173	6.84856	6.79086	6.71849
PINK1	PTEN induced putative kinase 1	65018	HGNC:14581|MIM:608309|Ensembl:ENSG00000158828|HPRD:10514|Vega:OTTHUMG00000002841	BRPK|PARK6	NM_032409	CACGAGGAACTCGTTTGAAGGGGGCAGCGTAGCATGTCTGATTTGCCACC	chr1	20959947	20978004	+	N	N	N	N	II1	e0	-7.53	-4.82	2.71	-0.259096	0.0716819	0.0566372	0.0269087	0.68283	0.796988	7.62158	7.36249	7.69327	7.67822
DDOST	dolichyl-diphosphooligosaccharide--protein glycosyltransferase subunit (non-catalytic)	1650	HGNC:2728|MIM:602202|Ensembl:ENSG00000244038|HPRD:03728|Vega:OTTHUMG00000002844	AGER1|CDG1R|OKSWcl45|OST|OST48|WBP1	NM_005216	CCTCTGTGGGAGATGCAACACTGAGAGCCAAGGGGTGGGAGTTGGGATAA	chr1	20978259	20988037	-	N	N	N	N	II1	e0	-7.71	-6.23	1.48	0.451711	0.395358	0.494851	0.00862368	0.0210344	0.00537533	10.0171	10.4688	10.4125	10.5119
KIF17	kinesin family member 17	57576	HGNC:19167|MIM:605037|Ensembl:ENSG00000117245|HPRD:10388|Vega:OTTHUMG00000002863	KIF17B|KIF3X|KLP-2|OSM-3	NM_001122819	CATACCACATCAGTGTTTCCGTCTGCTCACCTGCCACAGAGCCCACACCC	chr1	20990506	21044510	-	N	N	N	N	II1	e0	-5.59	-5.36	0.23	-0.154142	-0.0447963	-0.0428662	0.306306	0.848423	0.879102	6.74974	6.5956	6.70495	6.70688
SH2D5	SH2 domain containing 5	400745	HGNC:28819|Ensembl:ENSG00000189410|Vega:OTTHUMG00000002620	-	NM_001103161	AGCCTTTGCGCCCCCACTGGCCCTGAGCCCCTGTGTCCTGGTTTCTCTGT	chr1	21046224	21059133	-	N	N	N	N	II1	e0	-9.46	-5.63	3.83	0.0633906	0.119889	0.113894	0.817625	0.583547	0.641442	6.89331	6.9567	7.0132	7.0072
HP1BP3	heterochromatin protein 1, binding protein 3	50809	HGNC:24973|Ensembl:ENSG00000127483|HPRD:11026|Vega:OTTHUMG00000002622	HP1-BP74	NM_016287	GCCGCATCTGTGAAGCAGAGAGGGTCCAAACCTGCACCTAAAGTCTCAGC	chr1	21069170	21113181	-	N	N	N	N	II1	e0	-5.62	-6.16	-0.54	-0.27712	-0.0138167	-0.00961425	0.088129	0.96808	0.980988	8.4273	8.15018	8.41349	8.41769
EIF4G3	eukaryotic translation initiation factor 4 gamma, 3	8672	HGNC:3298|MIM:603929|Ensembl:ENSG00000075151|HPRD:06802|Vega:OTTHUMG00000002624	eIF-4G 3|eIF4G 3|eIF4GII	NM_001198803	TGGGAAGGGCGTGGCTCTGAAATCTGTCACGGCATTCTTCACGTGGCTGC	chr1	21267737	21501251	-	N	N	N	N	II1	e0	-3.75	-4.75	-1	0.235692	0.373001	0.315902	0.330304	0.0815209	0.173671	8.99559	9.23128	9.36859	9.31149
ECE1	endothelin converting enzyme 1	1889	HGNC:3146|MIM:600423|Ensembl:ENSG00000117298|HPRD:02690|Vega:OTTHUMG00000002625	ECE	NM_001113348	CCGCCTCACAAGTGCGAAGTCTGGTAAGGACGAAGCGGAGAGAGCCAAGA	chr1	21543739	21672034	-	N	N	N	N	II1	e0	-5.72	-5.1	0.62	0.188225	0.0504338	0.110047	0.136067	0.805226	0.51442	6.89712	7.08534	6.94755	7.00716
NBPF3	neuroblastoma breakpoint family, member 3	84224	HGNC:25076|MIM:612992|Ensembl:ENSG00000142794|HPRD:10633|Vega:OTTHUMG00000002944	AE2	NM_001256417	CTACAGAGTCGATACTGTGAGTTTCCAACCTCAGCCCATCTGTGGGCAGA	chr1	21766582	21811393	+	N	N	N	N	II1	e0	-6.07	-2.94	3.13	0.141905	0.0801851	0.182761	0.555278	0.786445	0.441103	8.22384	8.36574	8.30402	8.4066
ALPL	alkaline phosphatase, liver/bone/kidney	249	HGNC:438|MIM:171760|Ensembl:ENSG00000162551|HPRD:01377|Vega:OTTHUMG00000002949	AP-TNAP|APTNAP|HOPS|TNAP|TNSALP	NM_001127501	TCACACTCCTGGGCTCTGAACACACACGCCAGCTCCTCTCTGAAGCGACT	chr1	21835857	21904905	+	N	N	N	N	II1	e0	-5.44	-4.56	0.88	-0.0305381	-0.11536	-0.107636	0.891517	0.410883	0.492597	6.80142	6.77089	6.68606	6.69379
RAP1GAP	RAP1 GTPase activating protein	5909	HGNC:9858|MIM:600278|Ensembl:ENSG00000076864|HPRD:02609|Vega:OTTHUMG00000007513	RAP1GA1|RAP1GAP1|RAP1GAPII|RAPGAP	NM_001145658	TGGCCCCAATACCCATTTTGGAAGCCCCTGTGGCCGTGTGGATGTCGGTA	chr1	21922707	21978348	-	N	N	N	N	II1	e2	-7.97	-5.74	2.23	-0.816737	-0.954219	-1.15715	0.00331987	0.0010211	0.000216557	10.642	9.82531	9.68782	9.4849
USP48	ubiquitin specific peptidase 48	84196	HGNC:18533|Ensembl:ENSG00000090686|HPRD:15637|Vega:OTTHUMG00000007798	RAP1GA1|USP31	NM_032236	CAACACTACTGTTCAAGTTCCAGCCTTTCTTCAAGAGCTGGTAGATCGGG	chr1	22004791	22109688	-	N	N	N	N	II1	e2	-4.86	-4.8	0.06	-0.369612	-0.569024	-0.288936	0.0328617	0.0020096	0.120925	7.76725	7.39764	7.19823	7.47832
LDLRAD2	low density lipoprotein receptor class A domain containing 2	401944	HGNC:32071|Ensembl:ENSG00000187942|HPRD:18436|Vega:OTTHUMG00000002675	-	NM_001013693	TCAAAATCCCCCGTCAGTTCCCCTGACCCCCACCTCCACGCCAACATGCA	chr1	22138757	22151714	+	N	N	N	N	II1	e0	-6.86	-6.32	0.54	-0.0935662	-0.0119615	-0.0204436	0.486981	0.956935	0.932701	6.83776	6.74419	6.8258	6.81732
HSPG2	heparan sulfate proteoglycan 2	3339	HGNC:5273|MIM:142461|Ensembl:ENSG00000142798|HPRD:00804|Vega:OTTHUMG00000002674	HSPG|PLC|PRCAN|SJA|SJS|SJS1	NM_005529	TCCCTGGCTTCTCTGGCCCACGCTGCCAACAAGGCTCTGGACATGGCATA	chr1	22148736	22263750	-	N	N	N	N	II1	e0	-5.55	-6.21	-0.66	0.0390652	-0.000824926	-0.0443281	0.851855	0.996541	0.846543	6.66635	6.70541	6.66552	6.62202
CELA3B	chymotrypsin-like elastase family, member 3B	23436	HGNC:15945|Ensembl:ENSG00000219073|HPRD:06498|Vega:OTTHUMG00000002758	CBPP|E1|EL-1|ELA3B	NM_007352	GCCCAGTCAGCCCCCTTTGCTTACCTTCTGCCCTATATTAGAGCCCCAGG	chr1	22303417	22315847	+	N	N	N	N	II1	e0	-2.69	-4.72	-2.03	-0.10561	0.111323	-0.0274408	0.437003	0.406172	0.910827	6.88013	6.77452	6.99145	6.85269
CELA3A	chymotrypsin-like elastase family, member 3A	10136	HGNC:15944|Ensembl:ENSG00000142789|HPRD:06497|Vega:OTTHUMG00000002755	ELA3|ELA3A	NM_005747	TCCACGGTGTGACCAGCTTTGTTTCTGGCTTTGGCTGCAACTTCATCTGG	chr1	22328148	22339035	+	N	N	N	N	II1	e0	-3.27	-4.51	-1.24	-0.0128778	-0.0869082	-0.06045	0.945052	0.439113	0.677318	6.66225	6.64937	6.57534	6.6018
LINC00339	long intergenic non-protein coding RNA 339	29092	HGNC:25011|Ensembl:ENSG00000218510	HSPC157|NCRNA00339	NR_023919	CCTACAGAAAGAGTTTCTCTGTCCTCTTGTTAGGACAATCAGCCTGCTGC	chr1	22351996	22357717	+	N	N	N	N	II1	e2	-5.17	-7.08	-1.91	-0.35831	-0.503573	-0.535891	0.0150953	0.00143572	0.000943443	8.57572	8.21741	8.07215	8.03983
CDC42	cell division cycle 42	998	HGNC:1736|MIM:116952|Ensembl:ENSG00000070831|HPRD:00309|Vega:OTTHUMG00000002753	CDC42Hs|G25K	NM_001039802	AGCCGAGGAGACCCCGCGCAGTGCTGCCAACGCCCCGGTGGAGAAGCTGA	chr1	22379119	22419436	+	N	N	N	N	II1	e0	-7.06	-6.75	0.31	-0.0323754	0.170956	0.0939319	0.91139	0.300836	0.69078	8.50388	8.47151	8.67484	8.59782
WNT4	wingless-type MMTV integration site family, member 4	54361	HGNC:12783|MIM:603490|Ensembl:ENSG00000162552|HPRD:04601|Vega:OTTHUMG00000002894	SERKAL|WNT-4	NM_030761	CCTGCGCCGGCAACCACCTAGTGGCCCAGGGAAGGCCGATAATTTAAACA	chr1	22443797	22469519	-	N	N	N	N	II1	e0	-7.73	-8.22	-0.49	-0.0224904	-0.0325211	-0.0809779	0.915228	0.865198	0.610874	6.74866	6.72617	6.71614	6.66768
ZBTB40	zinc finger and BTB domain containing 40	9923	HGNC:29045|MIM:612106|Ensembl:ENSG00000184677|HPRD:11086|Vega:OTTHUMG00000002897	ZNF923	NM_014870	TGCAGGTGGCAAAATGGCACTGAATATCCCCTTGGCAGCAGAGAAAACCC	chr1	22778343	22857650	+	N	N	N	N	II1	e0	-3.99	-5.47	-1.48	0.459972	0.436516	0.343813	0.0147764	0.0214897	0.0814061	8.32342	8.78339	8.75994	8.66723
EPHA8	EPH receptor A8	2046	HGNC:3391|MIM:176945|Ensembl:ENSG00000070886|HPRD:01493|Vega:OTTHUMG00000002892	EEK|EK3|HEK3	NM_020526	TGAGCCCCCTCTCCCTCCTGCAATAATTCGGGGAGTCTCAGCCCCATCCA	chr1	22890003	22930087	+	N	N	N	N	II1	e0	-6.64	-5.86	0.78	-0.118872	-0.0153353	-0.0593967	0.288888	0.940454	0.724357	7.0605	6.94163	7.04516	7.0011
C1QA	complement component 1, q subcomponent, A chain	712	HGNC:1241|MIM:120550|Ensembl:ENSG00000173372|HPRD:00393|Vega:OTTHUMG00000002893	-	NM_015991	ACCAACAAGGGGCTCTTCCAGGTGGTGTCAGGGGGCATGGTGCTTCAGCT	chr1	22963117	22966175	+	N	N	N	N	II1	e0	-3.62	-4.06	-0.44	0.03766	-0.117567	0.0115856	0.867886	0.430757	0.969009	6.99029	7.02795	6.87273	7.00188
C1QC	complement component 1, q subcomponent, C chain	714	HGNC:1245|MIM:120575|Ensembl:ENSG00000159189|HPRD:00395|Vega:OTTHUMG00000002891	C1Q-C|C1QG	NM_001114101	ATGGTGGGCATCCAGGGCTCTGACAGCGTCTTCTCCGGCTTCCTGCTCTT	chr1	22970117	22974603	+	N	N	N	N	II1	e0	-6.12	-7.94	-1.82	0.0480211	0.06947	0.0193532	0.763676	0.619274	0.931556	6.73257	6.78059	6.80204	6.75192
C1QB	complement component 1, q subcomponent, B chain	713	HGNC:1242|MIM:120570|Ensembl:ENSG00000173369|HPRD:00394|Vega:OTTHUMG00000002896	-	NM_000491	CAGGCCACCGACAAGAACTCACTACTGGGCATGGAGGGTGCCAACAGCAT	chr1	22979681	22988029	+	N	N	N	N	II1	e0	-1.24	-1.96	-0.72	0.056551	0.0614853	0.0139502	0.726823	0.694085	0.955934	6.59833	6.65488	6.65981	6.61228
EPHB2	EPH receptor B2	2048	HGNC:3393|MIM:600997|Ensembl:ENSG00000133216|HPRD:02997|Vega:OTTHUMG00000002881	CAPB|DRT|EK5|EPHT3|ERK|Hek5|PCBC|Tyro5	NM_017449	AAACCCAGTTTTCCCTCTGGGAGCCTAAACCAGGCTGCATCGGAGGCCAG	chr1	23037330	23241823	+	N	N	N	N	II1	e0	-5.18	-3.5	1.68	0.0129576	-0.115561	-0.0708788	0.953397	0.351173	0.675223	6.71548	6.72843	6.59991	6.6446
LACTBL1	lactamase, beta-like 1	646262	HGNC:35445|Ensembl:ENSG00000215906|Vega:OTTHUMG00000003228	-	NM_001289974	GCCAAACTGGGGCCCTAACTGCCCTGTTCTTGCTGGTACCTTCTGGAGAG	chr1	23279535	23291923	-	N	N	N	N	II1	e0	-5.97	-4.14	1.83	0.0728571	0.011837	-0.0222598	0.772164	0.970319	0.951817	6.9828	7.05566	6.99464	6.96054
C1orf234	chromosome 1 open reading frame 234	729059	HGNC:44651|Ensembl:ENSG00000227868|Vega:OTTHUMG00000003226	-	NM_001242521	GGTTGGTCAAGTATGAACACAAGCTCACCCTCCCAGAGCCCCAGCAGGAC	chr1	23337326	23342343	-	N	N	N	N	II1	e0	-3.96	-6.15	-2.19	0.0679771	-0.0467692	-0.00122477	0.681707	0.801948	0.996255	6.77072	6.8387	6.72395	6.76949
KDM1A	lysine (K)-specific demethylase 1A	23028	HGNC:29079|MIM:609132|Ensembl:ENSG00000004487|HPRD:09800|Vega:OTTHUMG00000003220	AOF2|BHC110|KDM1|LSD1	NM_015013	GGAGCTTGCCTCCTTTGAATGACCTAGAGCACAGGGAGGAACTTGTCCAT	chr1	23345940	23410184	+	N	N	N	N	II1	e0	-4.5	-4.1	0.4	-0.287725	-0.042032	-0.215561	0.0561558	0.879496	0.201989	10.6319	10.3442	10.5898	10.4163
LUZP1	leucine zipper protein 1	7798	HGNC:14985|MIM:601422|Ensembl:ENSG00000169641|HPRD:03250|Vega:OTTHUMG00000003227	LUZP	NM_033631	TGGAGCTGCCTGTCTGCATGTATCCTCTGGCGCGAATGCTCTCTGTTGGC	chr1	23410515	23495351	-	N	N	N	N	II1	e1	-4.46	-4.95	-0.49	0.338811	0.852326	0.547342	0.0327535	2.7262e-05	0.00149801	8.921	9.25981	9.77332	9.46834
HTR1D	5-hydroxytryptamine (serotonin) receptor 1D, G protein-coupled	3352	HGNC:5289|MIM:182133|Ensembl:ENSG00000179546|HPRD:01636|Vega:OTTHUMG00000003235	5-HT1D|HT1DA|HTR1DA|HTRL|RDC4	NM_000864	TGGAGAGAGATTCAGAAGTTAGGGGTAGCGGGGGTAGGATGGTTGGGACC	chr1	23518387	23521222	-	N	N	N	N	II1	e0	-1.96	-7.46	-5.5	-0.0195468	0.0958435	0.135555	0.945882	0.630102	0.466016	6.71326	6.69371	6.8091	6.84882
HNRNPR	heterogeneous nuclear ribonucleoprotein R	10236	HGNC:5047|MIM:607201|Ensembl:ENSG00000125944|HPRD:06228|Vega:OTTHUMG00000003224	HNRPR|hnRNP R|hnRNP-R	NM_001102397	TGCTCTTGGACATTATTGGGCTTGCAGAGTTCCCTTATTCTGGGGATTAC	chr1	23636275	23670853	-	N	N	N	N	II1	e0	-5.73	-6.81	-1.08	-0.213779	-0.394783	-0.444762	0.369755	0.0527769	0.0310597	12.1135	11.8997	11.7187	11.6688
ZNF436	zinc finger protein 436	80818	HGNC:20814|MIM:611703|Ensembl:ENSG00000125945|HPRD:15793|Vega:OTTHUMG00000003232	ZNF|Zfp46	NM_030634	GAGCCACTATGGGTATCAGCTTGGGAGTGGCCATAGATGACCGCATTTCC	chr1	23685940	23694879	-	N	N	N	N	II1	e0	-5.06	-5.18	-0.12	-0.123379	0.140887	-0.057502	0.496365	0.415761	0.836594	7.16085	7.03748	7.30174	7.10335
C1orf213	chromosome 1 open reading frame 213	148898	HGNC:25122|Ensembl:ENSG00000249087|HPRD:14083|Vega:OTTHUMG00000003225	-	NR_033690	AAGAGGGAGTGGAAGGACAGTGGCTGAGGGGCTTCCTGTTGCAGCCTTCA	chr1	23695463	23698330	+	N	N	N	N	II1	e0	-7.16	-7.61	-0.45	-0.10074	-0.0757313	-0.0506431	0.428192	0.602151	0.792942	6.93765	6.83691	6.86192	6.887
TCEA3	transcription elongation factor A (SII), 3	6920	HGNC:11615|MIM:604128|Ensembl:ENSG00000204219|HPRD:16036|Vega:OTTHUMG00000003233	TFIIS|TFIIS.H	NM_003196	ACCAGGTGCAGACACGCAGTGCTGATGAGCCCATGACTACCTTTGTCTTA	chr1	23707554	23751261	-	N	N	N	N	II1	e0	-5.47	-4.77	0.7	-0.0766293	-0.0764811	0.0195518	0.626615	0.634036	0.940448	6.73597	6.65934	6.65949	6.75552
ASAP3	ArfGAP with SH3 domain, ankyrin repeat and PH domain 3	55616	HGNC:14987|Ensembl:ENSG00000088280|HPRD:11662|Vega:OTTHUMG00000003234	ACAP4|CENTB6|DDEFL1|UPLC1	NM_001143778	GTGGTTCCCACAGGAACAGGGTTGTCTTTTGAGCCCCCAGTGTCTGGTTT	chr1	23755055	23810750	-	N	N	N	N	II1	e0	-6.31	-4.66	1.65	-0.376172	-0.0554849	-0.184133	0.0190972	0.844188	0.357784	7.85685	7.48068	7.80136	7.67272
E2F2	E2F transcription factor 2	1870	HGNC:3114|MIM:600426|Ensembl:ENSG00000007968|HPRD:02692|Vega:OTTHUMG00000003223	E2F-2	NM_004091	CCGGCCTGGTTTCGCCTGGTCGTGTCTTTATGAGCACCATGTAAGCCTCC	chr1	23832919	23857712	-	N	N	N	N	II1	e2	-8.94	-6.75	2.19	-0.470142	-0.628899	-0.283924	0.0987249	0.0249334	0.439131	11.0476	10.5775	10.4187	10.7637
ID3	inhibitor of DNA binding 3, dominant negative helix-loop-helix protein	3399	HGNC:5362|MIM:600277|Ensembl:ENSG00000117318|HPRD:02608|Vega:OTTHUMG00000003229	HEIR-1|bHLHb25	NM_002167	CCCCAACTTCGCCCTGCCCACTTGACTTCACCAAATCCCTTCCTGGAGAC	chr1	23884420	23886285	-	N	N	N	N	II1	e1e2	-5.55	-5.3	0.25	-0.512794	0.810648	0.665081	0.000754763	1.15894e-05	8.22289e-05	10.5167	10.0039	11.3274	11.1818
RPL11	ribosomal protein L11	6135	HGNC:10301|MIM:604175|Ensembl:ENSG00000142676|HPRD:10364|Vega:OTTHUMG00000002926	DBA7|GIG34|L11	NM_001199802	GCATTGGGGCCAAACACAGAATCAGCAAAGAGGAGGCCATGCGCTGGTTC	chr1	24018268	24022915	+	N	N	N	N	II1	e0	-9.12	-7.32	1.8	0.0381109	0.11572	0.0767754	0.807071	0.252745	0.556823	13.7935	13.8316	13.9092	13.8702
TCEB3	transcription elongation factor B (SIII), polypeptide 3 (110kDa, elongin A)	6924	HGNC:11620|MIM:600786|Ensembl:ENSG00000011007|HPRD:02873|Vega:OTTHUMG00000002957	EloA|SIII|SIII p110|TCEB3A	NM_003198	AACCTGCGTGCCACAGCCCCGCCTCCCTGCCTGGAGCACACTTTAGAATT	chr1	24069855	24088549	+	N	N	N	N	II1	e1	-7.9	-5.74	2.16	0.762366	0.87358	0.682659	0.00435282	0.00162557	0.0106614	8.58183	9.3442	9.45541	9.26449
PITHD1	PITH (C-terminal proteasome-interacting domain of thioredoxin-like) domain containing 1	57095	HGNC:25022|Ensembl:ENSG00000057757|HPRD:13717|Vega:OTTHUMG00000002960	C1orf128|HT014|RP5-886K2.4|TXNL1CL	NM_020362	GTCAAGTTGCCCAGCTTGGAGTTGTCTGTCACGCACATGTGTCCTGTGGT	chr1	24104875	24114722	+	N	N	N	N	II1	e0	-4.54	-6.87	-2.33	0.306653	-0.0408758	0.108176	0.00324418	0.809614	0.399883	10.3661	10.6727	10.3252	10.4742
LYPLA2	lysophospholipase II	11313	HGNC:6738|Ensembl:ENSG00000011009|HPRD:07127|Vega:OTTHUMG00000002961	APT-2|DJ886K2.4	NM_007260	CCCCAGGCCCCTGCCCCAACTGATTCTGCCCAGATAATCGTGTCTCCTGC	chr1	24117645	24122029	+	N	N	N	N	II1	e0	-5.79	-2.61	3.18	0.0808772	0.497876	0.287938	0.567806	8.51669e-05	0.00805883	7.96877	8.04965	8.46665	8.25671
GALE	UDP-galactose-4-epimerase	2582	HGNC:4116|MIM:606953|Ensembl:ENSG00000117308|HPRD:06092|Vega:OTTHUMG00000002958	SDR1E1	NM_001127621	AGCACTTAAAGGGCCCGCGGCTCGGGCGTAGGAGGCGGTGCCTCTGCAGC	chr1	24122088	24126060	-	N	N	N	N	II1	e0	-10.22	-5.61	4.61	-0.102319	-0.143922	-0.0875497	0.387075	0.171805	0.528806	6.8199	6.71758	6.67598	6.73235
HMGCL	3-hydroxymethyl-3-methylglutaryl-CoA lyase	3155	HGNC:5005|MIM:613898|Ensembl:ENSG00000117305|HPRD:02003|Vega:OTTHUMG00000002963	HL	NM_000191	CAAGCTGGCAGAGGCCATTTGTGGAAAGTGGAGAGCTACGTGGTGGCCGT	chr1	24128366	24151949	-	N	N	N	N	II1	e0	-6.21	-6.62	-0.41	-0.0817483	-0.0127188	0.114715	0.554246	0.953395	0.381766	7.34913	7.26738	7.33641	7.46384
FUCA1	fucosidase, alpha-L- 1, tissue	2517	HGNC:4006|MIM:612280|Ensembl:ENSG00000179163|HPRD:01974|Vega:OTTHUMG00000002965	FUCA	NM_000147	GTCACCCTGTTGCCTATGGGAGGAGGTGGAAGGATTTGGCAAGCTCAACC	chr1	24171571	24194859	-	N	N	N	N	II1	e0	-5.19	-6.48	-1.29	-0.124438	-0.123778	-0.115253	0.412427	0.419407	0.503071	8.46207	8.33763	8.33829	8.34681
CNR2	cannabinoid receptor 2 (macrophage)	1269	HGNC:2160|MIM:605051|Ensembl:ENSG00000188822|HPRD:05444	CB-2|CB2|CX5	NM_001841	CTTCATGCCTGCATCCTCCAGAGACCACCAGGAGCCAAAGCGAGCCTCCA	chr1	24200459	24239817	-	N	N	N	N	II1	e0	-6.21	-6.22	-0.01	-0.179182	-0.125661	-0.0262654	0.123035	0.338541	0.916448	6.85577	6.67659	6.73011	6.82951
PNRC2	proline-rich nuclear receptor coactivator 2	55629	HGNC:23158|MIM:611882|Ensembl:ENSG00000189266|HPRD:17871|Vega:OTTHUMG00000013891	-	NM_017761	GTTTGGTCAAGGGGTAGGTGCAACCCAATGGACCACTTATGCAAAAGATG	chr1	24286300	24289949	+	N	N	N	N	II1	e0	-9.16	-8.11	1.05	-0.127158	0.159316	0.0727924	0.353601	0.211525	0.709627	10.7852	10.658	10.9445	10.858
SRSF10	serine/arginine-rich splicing factor 10	10772	HGNC:16713|MIM:605221|Ensembl:ENSG00000188529|HPRD:05562|Vega:OTTHUMG00000013893	FUSIP1|FUSIP2|NSSR|SFRS13|SFRS13A|SRp38|SRrp40|TASR|TASR1|TASR2	NM_054016	AAAAAGAACCACCTAGATCCAAATCTCAGTCAAGATCACAGTCTAGGTCT	chr1	24295572	24306953	-	N	N	N	N	II1	e0	-6.79	-7.41	-0.62	-0.351992	-0.43794	-0.492476	0.272605	0.146817	0.105356	8.75546	8.40346	8.31752	8.26298
MYOM3	myomesin 3	127294	HGNC:26679|Ensembl:ENSG00000142661|HPRD:08200|Vega:OTTHUMG00000002969	RP11-293P20.1	NM_152372	GCCTCTGCCTGGTGTGACAGATACCGGCTGGCCTCACTTGATGGATCTCA	chr1	24382530	24438665	-	N	N	N	N	II1	e0	-5.1	-5.97	-0.87	0.0784639	-0.0308308	0.0522704	0.670286	0.896345	0.831317	6.64967	6.72814	6.61884	6.70194
IL22RA1	interleukin 22 receptor, alpha 1	58985	HGNC:13700|MIM:605457|Ensembl:ENSG00000142677|HPRD:16108|Vega:OTTHUMG00000003041	CRF2-9|IL22R|IL22R1	NM_021258	ATCCTGAGAATGGGGTTTGAAAGGAAGGTGAGGGCTGTGGCCCCTGGACG	chr1	24446260	24469775	-	N	N	N	N	II1	e0	-2.71	-5.93	-3.22	-0.0153506	-0.0074018	0.0209396	0.935638	0.97007	0.919656	6.75012	6.73477	6.74272	6.77106
IFNLR1	interferon, lambda receptor 1	163702	HGNC:18584|MIM:607404|Ensembl:ENSG00000185436|HPRD:09589|Vega:OTTHUMG00000003036	CRF2/12|IFNLR|IL-28R1|IL28RA|LICR2	NM_170743	CTGGGCCTGCGCTGGAAGCATATCCCGTGAAAAGTGTTAGTGCCTTAGGT	chr1	24480646	24513765	-	N	N	N	N	II1	e0	-4.81	-3.5	1.31	-0.0500126	0.0748945	0.200193	0.7567	0.590703	0.0514952	6.94861	6.8986	7.0235	7.1488
GRHL3	grainyhead-like 3 (Drosophila)	57822	HGNC:25839|MIM:608317|Ensembl:ENSG00000158055|HPRD:12210|Vega:OTTHUMG00000003040	SOM|TFCP2L4	NM_198174	GTCTGTGTCAGGCAAGAATTAGAGACAAGCGGTCAGCAGAGCCTCAGTGC	chr1	24645811	24690970	+	N	N	N	N	II1	e0	-4.69	-6.77	-2.08	-0.0192478	0.0948539	0.0816429	0.931902	0.515349	0.631461	6.73474	6.71549	6.82959	6.81638
STPG1	sperm-tail PG-rich repeat containing 1	90529	HGNC:28070|Ensembl:ENSG00000001460|HPRD:14273|Vega:OTTHUMG00000003297	C1orf201|MAPO2	NM_001199014	AAATGCTGATTTAACTCCTCCAGGGTGGGGTCTGGGCAGTGGGGAGGCAG	chr1	24683488	24740262	-	N	N	N	N	II1	e0	-3.22	-4.94	-1.72	-0.029578	0.0452044	-0.00706097	0.866978	0.764489	0.975571	7.0018	6.97222	7.047	6.99474
NIPAL3	NIPA-like domain containing 3	57185	HGNC:25233|Ensembl:ENSG00000001461|HPRD:13149|Vega:OTTHUMG00000003299	DJ462O23.2|NPAL3	NM_020448	GGATACAGGACTCCATCAGGCTAGTGTTGGGGAACCAGCCCGGCAGCCTT	chr1	24742244	24799473	+	N	N	N	N	II1	e2	-5.02	-4.5	0.52	-0.625999	-0.511449	-0.461329	5.26367e-05	0.000331632	0.000875525	8.47764	7.85164	7.96619	8.01631
RCAN3	RCAN family member 3	11123	HGNC:3042|MIM:605860|Ensembl:ENSG00000117602|HPRD:05792	DSCR1L2|MCIP3|RCN3|hRCN3	NM_001251984	CTCCCCTCCAGCCATGTAAGTCCTCCTGATTCTGTATCACATGAGACACC	chr1	24828840	24863510	+	N	N	N	N	II1	e0	-4.45	-4.84	-0.39	-0.0300846	0.0877365	-0.10419	0.924597	0.720065	0.685393	7.14114	7.11105	7.22887	7.03695
NCMAP	noncompact myelin associated protein	400746	HGNC:29332|Ensembl:ENSG00000184454|HPRD:16963|Vega:OTTHUMG00000003317	C1orf130|MP11	NM_001010980	ATGAAGGCTTGGAGTTGGAGGGAAGAAGGGGAGATGGAGTGGTGAGGGCG	chr1	24882566	24935818	+	N	N	N	N	II1	e0	-4.66	-5.09	-0.43	0.0736598	-0.066032	-0.0327482	0.693602	0.735299	0.905763	6.9391	7.01276	6.87306	6.90635
SRRM1	serine/arginine repetitive matrix 1	10250	HGNC:16638|MIM:605975|Ensembl:ENSG00000133226|HPRD:10441|Vega:OTTHUMG00000003320	160-KD|POP101|SRM160	NM_005839	CAACTTTCAGAGCCTCTTGTATTTGGAAGGCTGGAAGGGCCCAGACTTTG	chr1	24969593	24999772	+	N	N	N	N	II1	e0	-5.06	-4.75	0.31	-0.110072	0.0149972	0.0956629	0.604342	0.963832	0.70644	10.9071	10.797	10.9221	11.0027
CLIC4	chloride intracellular channel 4	25932	HGNC:13518|MIM:606536|Ensembl:ENSG00000169504|HPRD:05943|Vega:OTTHUMG00000003327	CLIC4L|H1|MTCLIC|huH1|p64H1	NM_013943	TCTCTCCAGAGTTGCATGTAGATAGCATTTATTTCTGTGCCCTTAAACCC	chr1	25071759	25170815	+	N	N	N	N	II1	e2	-5.89	-6.48	-0.59	-0.738525	-0.539081	-0.360415	0.00143581	0.0138338	0.120387	9.76006	9.02154	9.22098	9.39965
RUNX3	runt-related transcription factor 3	864	HGNC:10473|MIM:600210|Ensembl:ENSG00000020633|HPRD:02565|Vega:OTTHUMG00000003316	AML2|CBFA3|PEBP2aC	NM_004350	AACCATCCCAGAGCTGGCGAGAGGATGGAGCTGGGTGGAAACTGCTTTGC	chr1	25226001	25256770	-	N	N	N	N	II1	e1	-8.55	-7.53	1.02	1.41027	1.25543	1.14189	1.15524e-05	3.70256e-05	9.61105e-05	9.63835	11.0486	10.8938	10.7802
SYF2	SYF2 pre-mRNA-splicing factor	25949	HGNC:19824|MIM:607090|HPRD:07386	CBPIN|NTC31|P29|fSAP29	NM_015484	CAGATTATGCTGCTGCCCAGTTACGCCAGTATCATCGGTTGACCAAGCAG	chr1	25548766	25559013	-	N	N	N	N	II1	e0	-5.19	-7.29	-2.1	-0.29297	0.0958364	-0.0890406	0.0726288	0.694251	0.755707	10.5044	10.2115	10.6003	10.4154
RSRP1	chromosome 1 open reading frame 63	57035	HGNC:25234|Ensembl:ENSG00000117616|HPRD:14835|Vega:OTTHUMG00000043611	DJ465N24.2.1|NPD014|RP3-465N24.4	NM_020317	TGCAGATATGAGAGATAGCACAGATGGACCAAAGGTTATGCACAGGTGGG	chr1	25568739	25573985	-	N	N	N	N	II1	e1	-10.28	-9.13	1.15	0.207005	0.573593	0.178291	0.486258	0.0150815	0.614032	7.78473	7.99173	8.35832	7.96302
RHD	Rh blood group, D antigen	6007	HGNC:10009|MIM:111680|Ensembl:ENSG00000187010|HPRD:00199|Vega:OTTHUMG00000003476	CD240D|DIIIc|RH|RH30|RHCED|RHDVA(TT)|RHDel|RHPII|RHXIII|Rh4|RhDCw|RhII|RhK562-II|RhPI	NM_016124	CATCTACATTGTGCTGCTGGTGCTTGATACCGTCGGAGCCGGCAATGGCA	chr1	25598976	25656936	+	N	N	N	N	II1	e0	-4.63	-3.82	0.81	-0.0112463	-0.0347689	-0.0151728	0.947518	0.79962	0.936265	6.70461	6.69337	6.66985	6.68944
TMEM50A	transmembrane protein 50A	23585	HGNC:30590|MIM:605348|Ensembl:ENSG00000183726|HPRD:05636|Vega:OTTHUMG00000007651	IFNRC|SMP1	NM_014313	CCCCACCCTACAACTGAGCACAACCTCTTTCCCCACAGTGCAATTCAGAA	chr1	25664788	25688852	+	N	N	N	N	II1	e0	-6.62	-6.35	0.27	0.200258	0.220404	0.135122	0.0443549	0.0281111	0.239822	7.4996	7.69985	7.72	7.63472
RHCE	Rh blood group, CcEe antigens	6006	HGNC:10008|MIM:111700|Ensembl:ENSG00000188672|HPRD:00200|Vega:OTTHUMG00000007650	CD240CE|RH|RH30A|RHC|RHE|RHIXB|RHPI|Rh4|RhIVb(J)|RhVI|RhVIII	NM_020485	CGCTCATGACAGCAAAGTCTCCTTATGTATAATGAAACAAGGTCAGAGAC	chr1	25688739	25747363	-	N	N	N	N	II1	e0	-4.61	-3.75	0.86	-0.0630987	-0.0438662	0.00961298	0.703854	0.813274	0.971622	6.64866	6.58557	6.6048	6.65828
TMEM57	transmembrane protein 57	55219	HGNC:25572|MIM:610301|Ensembl:ENSG00000204178|HPRD:13340|Vega:OTTHUMG00000003473	MACOILIN	NM_001282564	GCCCCTCTGGACTTGACCCCAATGCCTCTGTTTACCAGCCCCTGAAGAAA	chr1	25757348	25826698	+	N	N	N	N	II1	e0	-3.29	-5.35	-2.06	0.00107053	0.198606	0.108116	0.996137	0.163351	0.584559	7.90407	7.90515	8.10268	8.01219
LDLRAP1	low density lipoprotein receptor adaptor protein 1	26119	HGNC:18640|MIM:605747|Ensembl:ENSG00000157978|HPRD:05765|Vega:OTTHUMG00000007386	ARH|ARH1|ARH2|FHCB1|FHCB2	NM_015627	CATGAGGATAACTTCCTTGCCCCTGCTCTGTAGCCACCTCCTTGGCACCG	chr1	25870075	25895377	+	N	N	N	N	II1	e0	-8.16	-4.64	3.52	-0.295856	-0.142744	-0.188607	0.00890727	0.252736	0.114882	7.1449	6.84905	7.00216	6.9563
MAN1C1	mannosidase, alpha, class 1C, member 1	57134	HGNC:19080|HPRD:14354	HMIC|MAN1A3|MAN1C|pp6318	NM_020379	ACCTCCCCTGAAATCGGTCCTGATATATTCGAGAAGCATGAGGCCAGCCC	chr1	25943958	26112698	+	N	N	N	N	II1	e0	-6.69	-5.1	1.59	0.0988017	0.0313431	-0.0251644	0.439412	0.86826	0.913436	6.67827	6.77707	6.70961	6.6531
SEPN1	selenoprotein N, 1	57190	HGNC:15999|MIM:606210|Ensembl:ENSG00000162430|HPRD:05867|Vega:OTTHUMG00000007375	CFTD|MDRS1|RSMD1|RSS|SELN	NM_206926	TGGCCTGGGCTTTCTGAGGCCTTATCTGATGCCTCTGCAGTTCATGTCCC	chr1	26126666	26144713	+	N	N	N	N	II1	e0	-8.95	-6.08	2.87	-0.37321	-0.432183	-0.376748	0.0205555	0.00864146	0.0224237	7.56512	7.19191	7.13293	7.18837
MTFR1L	mitochondrial fission regulator 1-like	56181	HGNC:28836|Ensembl:ENSG00000117640|HPRD:14248|Vega:OTTHUMG00000007377	FAM54B|MST116|MSTP116	NM_001099625	CTGAACAACCAAATCTACCCTCCACGGCCCTGAGGCCTTATCAGTTCCAC	chr1	26146396	26159433	+	N	N	N	N	II1	e0	-7.53	-3.41	4.12	-0.0826214	-0.286846	-0.0755077	0.834974	0.244868	0.87188	7.52841	7.44579	7.24157	7.4529
LOC646471	uncharacterized LOC646471	646471	-	-	NR_024498	CCCCTTCGCCGAGCTCATTCTTCATCATTCCTCAGAGCTCAGCTTAAGCA	chr1	26146444	26150097	-	N	N	N	N	II1	e0	-8.87	-5.84	3.03	0.0741176	0.0740457	0.0690764	0.686065	0.686487	0.747383	6.68293	6.75705	6.75698	6.75201
AUNIP	aurora kinase A and ninein interacting protein	79000	HGNC:28363|Ensembl:ENSG00000127423|HPRD:08323|Vega:OTTHUMG00000007372	AIBP|C1orf135	NM_001287490	TCTGGATGTGACTCTGTTACCCTTTTCCCACAAGATAGGAGGGAATCCCC	chr1	26158403	26185949	-	N	N	N	N	II1	e2	-5.25	-5.62	-0.37	-0.55871	-0.549281	-0.4619	0.000678414	0.000771177	0.00337038	8.40692	7.84821	7.85764	7.94502
PAQR7	progestin and adipoQ receptor family member VII	164091	HGNC:23146|MIM:607779|Ensembl:ENSG00000182749|HPRD:09692|Vega:OTTHUMG00000007373	MPRA|PGLP|mSR	NM_178422	GAACTGTCAAGGGAGGTGCTGGAGAGGGATTAACCTGTGCTGCCTGGGAC	chr1	26187974	26197744	-	N	N	N	N	II1	e0	-6.93	-5.2	1.73	-0.102495	-0.121925	0.0742693	0.540736	0.439678	0.731751	6.77504	6.67255	6.65312	6.84931
STMN1	stathmin 1	3925	HGNC:6510|MIM:151442|Ensembl:ENSG00000117632|HPRD:01047|Vega:OTTHUMG00000007389	C1orf215|LAP18|Lag|OP18|PP17|PP19|PR22|SMN	NM_203401	CCGCACGTTCTCTGCCCCGTTTCTTGCCCCAGTGTGGTTTGCATTGTCTC	chr1	26226606	26232644	-	N	N	N	N	II1	e2	-7.55	-5.65	1.9	-0.181847	-0.617764	-0.632254	0.354549	0.000773407	0.000696917	11.5829	11.4011	10.9651	10.9507
PAFAH2	platelet-activating factor acetylhydrolase 2, 40kDa	5051	HGNC:8579|MIM:602344|Ensembl:ENSG00000158006|HPRD:03824|Vega:OTTHUMG00000007437	HSD-PLA2	NM_000437	GTTTGGTCAGCTAAAACTCAGCTGCAGCCTGGACAGTAGAGCGAGACCCC	chr1	26286257	26324648	-	N	N	N	N	II1	e0	-3.31	-5.76	-2.45	-0.103456	-0.0644097	-0.0323765	0.603567	0.785116	0.919616	7.78254	7.67908	7.71813	7.75016
EXTL1	exostosin-like glycosyltransferase 1	2134	HGNC:3515|MIM:601738|Ensembl:ENSG00000158008|HPRD:03441|Vega:OTTHUMG00000007509	EXTL	NM_004455	AGAACAGCCCCATCTCTTTCGCCTGCACACTTGGAACTCAGCAAGAAGGG	chr1	26348270	26362954	+	N	N	N	N	II1	e0	-5.92	-9.09	-3.17	-0.0161219	-0.0246397	-0.0201642	0.946539	0.912534	0.940846	6.79932	6.7832	6.77468	6.77916
SLC30A2	solute carrier family 30 (zinc transporter), member 2	7780	HGNC:11013|MIM:609617|Ensembl:ENSG00000158014|HPRD:18057|Vega:OTTHUMG00000007508	PP12488|TNZD|ZNT2|ZnT-2	NM_001004434	TGCACTAACAGCCTCCAAGCCCCCTGGCACTTCTGTTGCCCTGAGAGTGT	chr1	26364513	26372604	-	N	N	N	N	II1	e0	-6.68	-6.24	0.44	0.138422	-0.0286841	0.104643	0.170066	0.869256	0.388156	6.73221	6.87064	6.70353	6.83686
TRIM63	tripartite motif containing 63, E3 ubiquitin protein ligase	84676	HGNC:16007|MIM:606131|Ensembl:ENSG00000158022|HPRD:05843|Vega:OTTHUMG00000007510	IRF|MURF1|MURF2|RNF28|SMRZ	NM_032588	GGGTGACCTGCGATTGTCAGAAAGAGGGGAAGGAAGCCAGGTTGATACAG	chr1	26377795	26394125	-	N	N	N	N	II1	e0	-4.92	-3.7	1.22	0.0862195	-0.0661247	-0.029507	0.514366	0.658716	0.893835	6.89999	6.98621	6.83387	6.87049
PDIK1L	PDLIM1 interacting kinase 1 like	149420	HGNC:18981|MIM:610785|Ensembl:ENSG00000175087|HPRD:15110|Vega:OTTHUMG00000007511	CLIK1L|STK35L2	NM_001243532	GGCAGCTGTGGCCAGTGAAAATATGGGGTTGTACAGTTAGTTCCTAGAAT	chr1	26437655	26452039	+	N	N	N	N	II1	e0	-7.05	-7.23	-0.18	-0.0468622	-0.0653089	-0.118692	0.878647	0.81117	0.631884	8.21433	8.16746	8.14902	8.09563
FAM110D	family with sequence similarity 110, member D	79927	HGNC:25860|Ensembl:ENSG00000197245|HPRD:07848|Vega:OTTHUMG00000007537	GRRP1|RP11-96L14.5	NM_024869	CCCGTGGGTTTTGGAATGTGTGTTCCCGGCTGTGTGATCCTGGGCAAGAA	chr1	26485510	26489119	+	N	N	N	N	II1	e0	-6.67	-5.01	1.66	-0.260767	-0.332186	-0.306769	0.0217831	0.00471424	0.00916379	7.16431	6.90354	6.83212	6.85754
ZNF593	zinc finger protein 593	51042	HGNC:30943|HPRD:15866	ZT86	NM_015871	ATGGACAGTGACGCAAGGACTAGGCTGGGAGGGAGCGTGCCAACCCCTTT	chr1	26496387	26497364	+	N	N	N	N	II1	e1	-10.22	-8.75	1.47	1.1947	0.786252	0.611439	0.000662722	0.0144619	0.0632436	9.86501	11.0597	10.6513	10.4764
CNKSR1	connector enhancer of kinase suppressor of Ras 1	10256	HGNC:19700|MIM:603272|Ensembl:ENSG00000142675|Vega:OTTHUMG00000007541	CNK|CNK1|KSR	NM_006314	CCCTTGCCAAAGAAGAAACTCTCCCCCCAAATCCTCCAACCTCTGGGGCC	chr1	26503980	26516375	+	N	N	N	N	II1	e0	-3.67	-6.4	-2.73	0.0566641	0.0986788	0.0633239	0.745574	0.482585	0.737062	6.79691	6.85358	6.89559	6.86024
CATSPER4	cation channel, sperm associated 4	378807	HGNC:23220|MIM:609121|Ensembl:ENSG00000188782|HPRD:18607|Vega:OTTHUMG00000003383	-	NM_198137	GGTGCTTGAGGCAATACAGGAGAACCTGAGGCAGTACAAGGAGATCCGAG	chr1	26517118	26529033	+	N	N	N	N	II1	e0	-7.38	-4.52	2.86	0.0186029	0.0235285	-0.0336922	0.928971	0.904106	0.878112	6.74023	6.75883	6.76376	6.70654
CEP85	centrosomal protein 85kDa	64793	HGNC:25309|Ensembl:ENSG00000130695|HPRD:07844|Vega:OTTHUMG00000003380	CCDC21	NM_001281517	TGCTTAAAGGCAGAGCCGCCTGGTTGGTCTCCACCCTGTGCATTGGGAGC	chr1	26560643	26605529	+	N	N	N	N	II1	e0	-6.48	-6.48	0	0.408242	0.173026	0.0399205	0.304746	0.756694	0.962692	9.32293	9.73117	9.49596	9.36285
SH3BGRL3	SH3 domain binding glutamic acid-rich protein like 3	83442	HGNC:15568|HPRD:15332	SH3BP-1|TIP-B1	NM_031286	ATCACCACACTCCCCCCAGCCTTCACCTGGCCATGAAGGACCTTTTGACC	chr1	26606212	26608013	+	N	N	N	N	II1	e1	-9.09	-8.59	0.5	0.683107	1.42145	1.00832	0.00524974	9.85368e-06	0.00026933	9.97422	10.6573	11.3957	10.9825
UBXN11	UBX domain protein 11	91544	HGNC:30600|MIM:609151|Ensembl:ENSG00000158062|HPRD:10245|Vega:OTTHUMG00000003382	COA-1|SOC|SOCI|UBXD5	NM_001077262	TGACAACACCATTGGGGACGTGCGAGCTCTGCTAGCGCAGGCCAGGGTCA	chr1	26608772	26633195	-	N	N	N	N	II1	e1	-6.38	-6.93	-0.55	0.447709	0.472471	0.625197	0.00224641	0.00150878	0.000149665	7.6424	8.09011	8.11487	8.2676
CD52	CD52 molecule	1043	HGNC:1804|MIM:114280|Ensembl:ENSG00000169442|HPRD:00257|Vega:OTTHUMG00000003491	CDW52	NM_001803	AACGACACCAGCCAAACCAGCAGCCCCTCAGCATCCAGCAACATAAGCGG	chr1	26644410	26647014	+	N	N	N	N	II1	e1	-7.73	-4.15	3.58	0.127306	0.316664	0.507151	0.657922	0.122722	0.0121465	9.16668	9.29399	9.48335	9.67383
AIM1L	absent in melanoma 1-like	55057	HGNC:17295|HPRD:09794	CRYBG2	NM_001039775	TACGAGGATGGGCTGCTGAAGAACCAGATGGCCCCCACCATGAGCCTACA	chr1	26648349	26680621	-	N	N	N	N	II1	e0	-6.89	-6.32	0.57	0.0279506	0.0477405	0.0631851	0.873627	0.7459	0.671257	6.76123	6.78918	6.80897	6.82442
ZNF683	zinc finger protein 683	257101	HGNC:28495|Ensembl:ENSG00000176083|HPRD:14563|Vega:OTTHUMG00000003521	-	NM_173574	AGTGTCCTCGACATCCCAGGGGAAAGCAAGAGCAGTGAGCCTGAGCAGTG	chr1	26688124	26699266	-	N	N	N	N	II1	e1	-5.36	-6.11	-0.75	0.0426878	0.743215	1.41262	0.823531	2.51414e-06	2.95113e-09	6.95947	7.00216	7.70268	8.37209
LIN28A	lin-28 homolog A (C. elegans)	79727	HGNC:15986|MIM:611043|Ensembl:ENSG00000131914|HPRD:17278|Vega:OTTHUMG00000003550	CSDD1|LIN-28|LIN28|ZCCHC1|lin-28A	NM_024674	CTGAACTGCAGGAGACTGAGCCCCTTTGGGCTTTGGTGACCCCATCACTG	chr1	26737268	26756219	+	N	N	N	N	II1	e0	-7.24	-7.33	-0.09	0.0110715	-0.000822892	-0.102713	0.966448	0.996616	0.540937	6.71351	6.72458	6.71269	6.6108
DHDDS	dehydrodolichyl diphosphate synthase	79947	HGNC:20603|MIM:608172|Ensembl:ENSG00000117682|HPRD:12183|Vega:OTTHUMG00000003554	CIT|CPT|DS|HDS|RP59	NM_001243565	GAGAAGCTGCCCCAGGAGGCGATGTAGTGGTGGAAAGAAGAGGCAGAGAG	chr1	26758772	26797795	+	N	N	N	N	II1	e0	-6.11	-4.04	2.07	0.257636	0.121058	0.14695	0.0555232	0.480576	0.389464	7.49163	7.74926	7.61269	7.63858
HMGN2	high mobility group nucleosomal binding domain 2	3151	HGNC:4986|MIM:163910|HPRD:01230	HMG17	NM_005517	TGGTAGATCTGCGGTTTTGGCTGGGTAGCTGACAGGAGCCTCTCTACTTC	chr1	26798901	26803133	+	N	N	N	N	II1	e2	-3.62	-5.85	-2.23	0.198603	-0.608072	-0.459307	0.173238	0.000160791	0.00189554	8.51055	8.70915	7.90248	8.05124
RPS6KA1	ribosomal protein S6 kinase, 90kDa, polypeptide 1	6195	HGNC:10430|MIM:601684|Ensembl:ENSG00000117676|HPRD:03402|Vega:OTTHUMG00000004003	HU-1|MAPKAPK1A|RSK|RSK1	NM_001006665	AGAGTTCACAGGAGGCCAGTGGGCGGGCCATGAGGGACAGGGTCTTTTTT	chr1	26872342	26901520	+	N	N	N	N	II1	e0	-6.94	-5.47	1.47	0.230725	0.484968	0.383381	0.213132	0.00578005	0.028288	8.57728	8.808	9.06224	8.96066
MIR1976	microRNA 1976	100302190	HGNC:37064|miRBase:MI0009986	hsa-mir-1976	NR_031740	AGCAAGGAAGGCAGGGGTCCTAAGGTGTGTCCTCCTGCCCTCCTTGCTGT	chr1	26881032	26881084	+	N	N	N	N	II1	e0	-8.86	-6.85	2.01	0.0511986	0.126731	0.0646519	0.797514	0.365309	0.756737	6.77214	6.82333	6.89887	6.83679
ARID1A	AT rich interactive domain 1A (SWI-like)	8289	HGNC:11110|MIM:603024|Ensembl:ENSG00000117713|HPRD:04319|Vega:OTTHUMG00000004004	B120|BAF250|BAF250a|BM029|C1orf4|ELD|MRD14|OSA1|P270|SMARCF1|hELD|hOSA1	NM_139135	CGCCCCTCTTGGTGCGATGCTGTACAGGTCTCTGTAAAAAGTCCTTGCTG	chr1	27022521	27108601	+	N	N	N	N	II1	e0	-6.27	-6.91	-0.64	0.209129	0.157957	-0.0136474	0.465108	0.628737	0.981039	11.0734	11.2825	11.2314	11.0598
PIGV	phosphatidylinositol glycan anchor biosynthesis, class V	55650	HGNC:26031|MIM:610274|Ensembl:ENSG00000060642|HPRD:07912|Vega:OTTHUMG00000004005	GPI-MT-II|HPMRS1|PIG-V	NM_017837	GGCATTAGCTGACAGGCTGGTAACAGTCCACACAAGATGGTATAGGCCTG	chr1	27114453	27124894	+	N	N	N	N	II1	e0	-6.48	-7.37	-0.89	0.328679	0.319334	0.188505	0.262579	0.284852	0.645468	7.45569	7.78437	7.77502	7.6442
ZDHHC18	zinc finger, DHHC-type containing 18	84243	HGNC:20712|Ensembl:ENSG00000204160|HPRD:15713|Vega:OTTHUMG00000004092	DHHC-18|DHHC18	NM_032283	TAGATATTGTTCCACCATCCCCCTCCTTGGCCCTTCAAGTGGGCTGAAGC	chr1	27153200	27182211	+	N	N	N	N	II1	e0	-7.6	-5.4	2.2	-0.0308322	0.0426939	0.0946274	0.920429	0.880373	0.71214	8.14764	8.11681	8.19033	8.24227
SFN	stratifin	2810	HGNC:10773|MIM:601290|Ensembl:ENSG00000175793|HPRD:03185|Vega:OTTHUMG00000004093	YWHAS	NM_006142	CTCTGATCGTAGGAATTGAGGAGTGTCCCGCCTTGTGGCTGAGAACTGGA	chr1	27189632	27190947	+	N	N	N	N	II1	e0	-7.61	-7.41	0.2	0.0542832	0.0489587	0.0594543	0.682443	0.722784	0.678308	6.66527	6.71956	6.71423	6.72473
GPN2	GPN-loop GTPase 2	54707	HGNC:25513|HPRD:07665	ATPBD1B	NM_018066	GGCCCTGCCACCAGAAAGTCGAGCACTGGTCCTAGTCAGGCTGTGATGAA	chr1	27205872	27216869	-	N	N	N	N	II1	e1	-6.88	-4.89	1.99	0.670898	0.677077	0.549618	0.00562157	0.00547689	0.0233381	9.01868	9.68958	9.69576	9.5683
GPATCH3	G patch domain containing 3	63906	HGNC:25720|Ensembl:ENSG00000198746|HPRD:07772|Vega:OTTHUMG00000004229	GPATC3	NM_022078	GGGTAACGACCGCTTGTCTTTGGTCTCTAACCCTAATCTCTGGGCTTGCC	chr1	27216978	27226962	-	N	N	N	N	II1	e0	-7.69	-8.31	-0.62	-0.0681655	-0.0525305	-0.208669	0.763329	0.826537	0.177339	7.91077	7.84261	7.85824	7.7021
NR0B2	nuclear receptor subfamily 0, group B, member 2	8431	HGNC:7961|MIM:604630|Ensembl:ENSG00000131910|HPRD:05219|Vega:OTTHUMG00000004231	SHP|SHP1	NM_021969	TTCCAGCCCAGGCAGAGATCAGGTGGGCAGAGGCTGGCAGTGCTGATTCA	chr1	27237974	27240567	-	N	N	N	N	II1	e0	-5.68	-3.18	2.5	-0.0940852	0.00191926	-0.070999	0.4045	0.99122	0.615135	6.67306	6.57898	6.67498	6.60206
NUDC	nudC nuclear distribution protein	10726	HGNC:8045|MIM:610325|Ensembl:ENSG00000090273|HPRD:10122|Vega:OTTHUMG00000004226	HNUDC|MNUDC|NPD011	NM_006600	CATCAGGAGAAAGGCTGGGTCTTGGGACCTTGTCCTCCCCAGTTGGCCTA	chr1	27248212	27273362	+	N	N	N	N	II1	e0	-6.66	-7.41	-0.75	0.363484	0.35745	0.252441	0.154043	0.165663	0.424596	12.2238	12.5873	12.5813	12.4762
C1orf172	chromosome 1 open reading frame 172	126695	HGNC:26624|Ensembl:ENSG00000175707|HPRD:08754|Vega:OTTHUMG00000004272	RP11-344H11.3	NM_152365	GCTCCTCCTGCCTTGGCTGACTGGGTTCCTGGACCATGTGCATTTCACTG	chr1	27276046	27286901	-	N	N	N	N	II1	e0	-5.42	-6.17	-0.75	0.00838246	0.0496974	-0.036819	0.970449	0.757758	0.859365	6.82145	6.82984	6.87115	6.78463
TRNP1	TMF1-regulated nuclear protein 1	388610	HGNC:34348|Ensembl:ENSG00000253368|HPRD:18384|Vega:OTTHUMG00000004277	C1orf225|TNRP	NM_001013642	CGTGGGAGTGTGCTTGTGGCCCCTCAGAAAGATAGTCTGCTGGCTCCTAG	chr1	27320194	27327377	+	N	N	N	N	II1	e0	-7.83	-5.59	2.24	-0.0811417	-0.0158415	-0.00148898	0.542628	0.939498	0.994666	6.96525	6.88411	6.94941	6.96376
FAM46B	family with sequence similarity 46, member B	115572	HGNC:28273|Ensembl:ENSG00000158246|HPRD:16882|Vega:OTTHUMG00000004278	RP11-344H11.8	NM_052943	GAGCCCTCCTGCCTGGGAGCTTGTTCTTTGGAAGGTGCTGAGCCTGAATT	chr1	27331510	27339333	-	N	N	N	N	II1	e0	-6.92	-5.48	1.44	-0.0474455	0.0198948	-0.0353799	0.751984	0.912779	0.852199	6.66043	6.61299	6.68033	6.62505
SLC9A1	solute carrier family 9, subfamily A (NHE1, cation proton antiporter 1), member 1	6548	HGNC:11071|MIM:107310|Ensembl:ENSG00000090020|HPRD:00123|Vega:OTTHUMG00000004271	APNH|NHE-1|NHE1	NM_003047	TCCTCGGCCCATCTGTCCATCCTCCTCTCCATGCAAGTGCTGTTTGGGCA	chr1	27425299	27481621	-	N	N	N	N	II1	e1	-6.87	-5.76	1.11	0.61982	0.655787	0.418456	0.0535738	0.042163	0.265073	8.99493	9.61475	9.65072	9.41339
WDTC1	WD and tetratricopeptide repeats 1	23038	HGNC:29175|Ensembl:ENSG00000142784|HPRD:10307|Vega:OTTHUMG00000004273	ADP|DCAF9	NM_015023	TTTCTCTAGCCAGGGAGAAGGGAGAGCAGGAGTATTGGGGCTGGGCCCTG	chr1	27561006	27635124	+	N	N	N	N	II1	e0	-5.72	-5.65	0.07	0.0350692	0.0130121	-0.00164696	0.909603	0.968816	0.996277	6.81746	6.85253	6.83048	6.81582
TMEM222	transmembrane protein 222	84065	HGNC:25363|Ensembl:ENSG00000186501|HPRD:13167|Vega:OTTHUMG00000004410	C1orf160	NR_037576	AGGGGCTGTCCCCCACCTAACTCCAGCTCCCCCTTCACGTTGTCACCAAG	chr1	27648635	27662891	+	N	N	N	N	II1	e0	-7.08	-7.59	-0.51	0.306836	0.138524	-0.0224179	0.00870544	0.292993	0.93265	7.62661	7.93345	7.76514	7.60419
LOC644961	actin, gamma 1 pseudogene	644961	-	-	NR_033926	GCTCTCAATACACCTGGTGTAGCCAGGGAGAGAGTTGTAGGCCAGCAGGA	chr1	27650364	27653016	+	N	N	N	N	II1	e0	-5.83	-7.84	-2.01	0.0992559	0.0763688	0.0874374	0.515848	0.658621	0.627675	6.68144	6.7807	6.75781	6.76888
SYTL1	synaptotagmin-like 1	84958	HGNC:15584|MIM:608042|Ensembl:ENSG00000142765|Vega:OTTHUMG00000005770	JFC1|SLP1	NM_001193308	GGGCAGGATCCCTGGACACTTACGTACAATGCTTCGTGCTGCCTGATGAC	chr1	27668482	27680423	+	N	N	N	N	II1	e2	-6.47	-5.36	1.11	-0.0777452	-0.613201	-0.634921	0.780082	0.000829723	0.000675763	7.88722	7.80948	7.27402	7.2523
MAP3K6	mitogen-activated protein kinase kinase kinase 6	9064	HGNC:6858|MIM:604468|Ensembl:ENSG00000142733|HPRD:05126|Vega:OTTHUMG00000004631	ASK2|MAPKKK6|MEKK6	NM_004672	GGATGAATGGAGAGGACAAAGGCAGCTTCTGACACACCAGCCCCAGGACC	chr1	27681669	27693337	-	N	N	N	N	II1	e0	-6.61	-5.27	1.34	-0.120298	-0.00566544	-0.0543978	0.353621	0.980449	0.792408	6.97032	6.85002	6.96466	6.91592
FCN3	ficolin (collagen/fibrinogen domain containing) 3	8547	HGNC:3625|MIM:604973|Ensembl:ENSG00000142748|HPRD:05399|Vega:OTTHUMG00000005722	FCNH|HAKA1	NM_173452	ACCAGCTGGCACTGGGCAAGTTCTCAGAGGGCACTGCAGGGGATTCCCTG	chr1	27695600	27701315	-	N	N	N	N	II1	e0	-6.61	-7.56	-0.95	-0.0169734	-0.108031	-0.0190258	0.945659	0.482249	0.946573	6.85653	6.83955	6.7485	6.8375
CD164L2	CD164 sialomucin-like 2	388611	HGNC:32043|Ensembl:ENSG00000174950|HPRD:15619|Vega:OTTHUMG00000003395	UNQ6122	NM_207397	CTGGGCCTGGAACCTGCAGCTGAGAAAATCCCTCAACCACCTCGTCTCCT	chr1	27705595	27709805	-	N	N	N	N	II1	e0	-6.86	-4.92	1.94	-0.00980379	-0.0578311	-0.124643	0.970849	0.765055	0.427623	6.85787	6.84806	6.80004	6.73323
GPR3	G protein-coupled receptor 3	2827	HGNC:4484|MIM:600241|Ensembl:ENSG00000181773|HPRD:02587|Vega:OTTHUMG00000003397	ACCA	NM_005281	AGCCATCACCTGAGCAACCAAAAATTCCTCTGCGCTGGGGTCCGACTGCC	chr1	27719147	27722317	+	N	N	N	N	II1	e1	-7.11	-7.33	-0.22	0.569366	0.198361	0.185723	0.000785304	0.24847	0.324497	7.1108	7.68017	7.30917	7.29653
WASF2	WAS protein family, member 2	10163	HGNC:12733|MIM:605875|Ensembl:ENSG00000158195|HPRD:05796|Vega:OTTHUMG00000003393	IMD2|SCAR2|WASF4|WAVE2|dJ393P12.2	NM_006990	GGTTTGGGCCTAATGGCTTTGACTAAATTACCCCCATCCTCCTTGCCCGG	chr1	27730733	27816678	-	N	N	N	N	II1	e0	-4.27	-5.97	-1.7	-0.232186	-0.261261	-0.187783	0.247189	0.178609	0.427936	8.41355	8.18136	8.15229	8.22576
AHDC1	AT hook, DNA binding motif, containing 1	27245	HGNC:25230|Ensembl:ENSG00000126705|HPRD:10885|Vega:OTTHUMG00000003398	CL23945|DJ159A19.3|RP1-159A19.1	NM_001029882	TCAGAAAACCAACGCCAAGATCCCTCCCAGCGTCCACATCGTCCTCTGGC	chr1	27860755	27930143	-	N	N	N	N	II1	e0	-6.38	-5.81	0.57	-0.111606	-0.108283	-0.115679	0.580365	0.603069	0.601919	7.02612	6.91452	6.91784	6.91044
FGR	feline Gardner-Rasheed sarcoma viral oncogene homolog	2268	HGNC:3697|MIM:164940|Ensembl:ENSG00000000938|HPRD:01288|Vega:OTTHUMG00000003516	SRC2|c-fgr|c-src2|p55-Fgr|p55c-fgr|p58-Fgr|p58c-fgr	NM_001042729	TGGGCCCAGGTTTGAGGGAGAAGGTTGCAGAGCACTTCCCACCTCTCTGA	chr1	27938800	27953106	-	N	N	N	N	II1	e2	-8.53	-8.15	0.38	-0.639074	-1.3335	-1.2069	0.00592128	1.1484e-05	3.19101e-05	9.01403	8.37496	7.68053	7.80713
IFI6	interferon, alpha-inducible protein 6	2537	HGNC:4054|MIM:147572|Ensembl:ENSG00000126709|HPRD:00959|Vega:OTTHUMG00000003518	6-16|FAM14C|G1P3|IFI-6-16|IFI616	NM_002038	TGCGCCGACGATGCCCAGAATCCAGAACTTTGTCTATCACTCTCCCCAAC	chr1	27992571	27998724	-	N	N	N	N	II1	e0	-6.44	-6.47	-0.03	0.0898646	0.273534	0.119162	0.777999	0.186487	0.711282	10.7308	10.8207	11.0044	10.85
FAM76A	family with sequence similarity 76, member A	199870	HGNC:28530|Ensembl:ENSG00000009780|HPRD:14583|Vega:OTTHUMG00000003729	-	NM_152660	CAATGCATAAGTATGGAGCTAAGTGCCTTTTGGAGGATTTCTTGGAAGAG	chr1	28052489	28089423	+	N	N	N	N	II1	e0	-4.76	-5	-0.24	-0.0542054	-0.010375	-0.00318345	0.773399	0.966548	0.990895	6.8607	6.80649	6.85032	6.85751
STX12	syntaxin 12	23673	HGNC:11430|MIM:606892|Ensembl:ENSG00000117758|HPRD:06059|Vega:OTTHUMG00000003730	STX13|STX14	NM_177424	GTTGGGGTGGCACAGTGGCCCAAAGAGCAGCTTCAGAGATAATTCCTTGG	chr1	28099693	28150963	+	N	N	N	N	II1	e0	-4.86	-5.27	-0.41	-0.0885969	0.069436	-0.112804	0.681116	0.765382	0.603028	8.04175	7.95315	8.11118	7.92894
PPP1R8	protein phosphatase 1, regulatory subunit 8	5511	HGNC:9296|MIM:602636|Ensembl:ENSG00000117751|HPRD:04028|Vega:OTTHUMG00000003734	ARD-1|ARD1|NIPP-1|NIPP1|PRO2047	NM_138558	TGTTTGCTAAAGGCACAGTCACTGGGCTTGGGAGGCAATGCTCCATCCCC	chr1	28157324	28178183	+	N	N	N	N	II1	e1	-5.68	-6.74	-1.06	0.635228	0.290185	0.198177	8.22733e-06	0.00692586	0.069201	7.56479	8.20002	7.85497	7.76297
SCARNA1	small Cajal body-specific RNA 1	677774	HGNC:32555	ACA35	NR_002997	CAGCACTTGATACTAACCGAGCTGTCTATATCCTAGCCTTGTGTCAAAGG	chr1	28160911	28161077	+	N	N	N	N	II1	e0	-2.59	-8.15	-5.56	-0.0104533	-0.0415592	-0.0601973	0.970281	0.851333	0.796904	6.76475	6.75429	6.72319	6.70455
THEMIS2	thymocyte selection associated family member 2	9473	HGNC:16839|Ensembl:ENSG00000130775|HPRD:12728|Vega:OTTHUMG00000003735	C1orf38|ICB-1	NM_001105556	TTTTGTTAACGTCTGCCACCCCCACTCTCACCCCCAAGCTCTAAGCCCCC	chr1	28199053	28213196	+	N	N	N	N	II1	e0	-7.12	-6.57	0.55	0.0664971	-0.0219432	-0.0578956	0.561336	0.890827	0.670673	6.78613	6.85262	6.76418	6.72823
RPA2	replication protein A2, 32kDa	6118	HGNC:10290|MIM:179836|Ensembl:ENSG00000117748|HPRD:01566|Vega:OTTHUMG00000003915	REPA2|RPA32	NM_002946	TGACGTGTGTTTCTGTGAACATGAAGTTCTGCGGTAGTGCCTCCAGGGGC	chr1	28218035	28241308	-	N	N	N	N	II1	e0	-4.57	-5.65	-1.08	0.123253	-0.133355	-0.0433184	0.436003	0.387652	0.872361	10.8177	10.941	10.6844	10.7744
SMPDL3B	sphingomyelin phosphodiesterase, acid-like 3B	27293	HGNC:21416|Ensembl:ENSG00000130768|HPRD:15405|Vega:OTTHUMG00000003910	ASML3B	NM_001009568	TTCATCTTGTCTCCGTCCTGCTCAAAAACCTTCAGTGGCTCCCCAGTGCC	chr1	28261503	28282991	+	N	N	N	N	II1	e0	-6.3	-5.11	1.19	-0.0275269	-0.0766924	-0.0927442	0.909074	0.66451	0.607913	6.72175	6.69422	6.64505	6.629
XKR8	XK, Kell blood group complex subunit-related family, member 8	55113	HGNC:25508|Ensembl:ENSG00000158156|HPRD:07661|Vega:OTTHUMG00000003912	RP11-460I13.3|XRG8	NM_018053	GCACCAACCAGTCCCGGGTTAGATCCCAAATGCTAGAAGCCAGGGATGCC	chr1	28286503	28294604	+	N	N	N	N	II1	e0	-7.97	-7.97	0	-0.288067	-0.196449	-0.186061	0.100573	0.32155	0.396348	7.81301	7.52494	7.61656	7.62695
EYA3	eyes absent homolog 3 (Drosophila)	2140	HGNC:3521|MIM:601655|Ensembl:ENSG00000158161|HPRD:09042|Vega:OTTHUMG00000003916	-	NM_001282560	GTGTGAATGTTCTGATCACTACCACCCAGCTGGTTCCAGCCCTGGCCAAG	chr1	28303783	28415148	-	N	N	N	N	II1	e2	-3.78	-4.48	-0.7	-0.303868	-0.584707	-0.578333	0.020096	0.000147478	0.000176821	7.70525	7.40139	7.12055	7.12692
PTAFR	platelet-activating factor receptor	5724	HGNC:9582|MIM:173393|Ensembl:ENSG00000169403|HPRD:01422|Vega:OTTHUMG00000003953	PAFR	NM_001164723	GGCCAGGTGCAGACCTTGGGGGAAGACTTTAAACCACCTAGTTCTCCCCG	chr1	28473676	28503455	-	N	N	N	N	II1	e0	-2.97	-4.71	-1.74	-0.236284	-0.212995	-0.241724	0.0716576	0.115056	0.0746768	7.28728	7.05099	7.07428	7.04555
DNAJC8	DnaJ (Hsp40) homolog, subfamily C, member 8	22826	HGNC:15470|Ensembl:ENSG00000126698|HPRD:13236|Vega:OTTHUMG00000003538	HSPC331|SPF31	NM_014280	CTAGCCGTCCTCCACCCAGTACCATGTCCTAGCCTGTCTGCATTTGTTAG	chr1	28526789	28559542	-	N	N	N	N	II1	e0	-4.5	-3.72	0.78	0.124859	0.183744	0.0596992	0.491215	0.242011	0.830142	11.7632	11.888	11.9469	11.8229
ATPIF1	ATPase inhibitory factor 1	93974	HGNC:871|MIM:614981|Ensembl:ENSG00000130770|HPRD:16529|Vega:OTTHUMG00000003533	ATPI|ATPIP|IP	NM_178190	CACTAGTTGAGGAGTAGAAGAGGATGACCAGCTAGACTCCCATGGAATTG	chr1	28562601	28564616	+	N	N	N	N	II1	e0	-9.29	-8.76	0.53	-0.23836	-0.144895	-0.0592351	0.131186	0.446176	0.845606	7.55474	7.31638	7.40984	7.4955
SESN2	sestrin 2	83667	HGNC:20746|MIM:607767|Ensembl:ENSG00000130766|HPRD:06378|Vega:OTTHUMG00000003532	HI95|SES2|SEST2	NM_031459	TCCTCTCTGACCAGTTTGGAGGGCACTGAAGAAAGGCAAGGGCCGTGCTG	chr1	28585962	28609002	+	N	N	N	N	II1	e0	-6.62	-6.59	0.03	-0.352199	-0.206155	-0.278779	0.0271301	0.244573	0.0991516	7.23675	6.88455	7.03059	6.95797
MED18	mediator complex subunit 18	54797	HGNC:25944|MIM:612384|Ensembl:ENSG00000130772|HPRD:17476|Vega:OTTHUMG00000003537	p28b	NM_001127350	GTCACGGAGAATCTATCTAATCCCACTGTATTAAGAGGGGAAACCGGGCC	chr1	28655512	28662478	+	N	N	N	N	II1	e0	-4.84	-5.26	-0.42	0.0560862	0.0604444	0.0266062	0.692662	0.663981	0.89725	6.85084	6.90693	6.91129	6.87745
PHACTR4	phosphatase and actin regulator 4	65979	HGNC:25793|MIM:608726|Ensembl:ENSG00000204138|HPRD:07816|Vega:OTTHUMG00000003541	-	NM_023923	GGCACGTGCCACCAGGCCCAGCTAATTTTTGTGTTTTGTTAGAGATGAGG	chr1	28764660	28826881	+	N	N	N	N	II1	e0	-3.65	-4.48	-0.83	0.0973564	0.0634498	0.0414527	0.504018	0.715663	0.858551	6.59762	6.69498	6.66107	6.63907
SNHG3	small nucleolar RNA host gene 3 (non-protein coding)	8420	HGNC:10118|MIM:603238|Ensembl:ENSG00000242125|Vega:OTTHUMG00000003657	NCRNA00014|RNU17C|RNU17D|U17HG|U17HG-A|U17HG-AB	NR_036473	TATTGGCCAGGCTGTTCTCAACTCCTGACCTCGTGATCCGCCCACCTCAG	chr1	28832454	28837404	+	N	N	N	N	II1	e0	-5.91	-8.46	-2.55	0.00386662	0.0436765	-0.00550394	0.986063	0.80059	0.983503	6.82125	6.82511	6.86492	6.81574
RCC1	regulator of chromosome condensation 1	1104	HGNC:1913|MIM:179710|Ensembl:ENSG00000180198|HPRD:01559|Vega:OTTHUMG00000003645	CHC1|RCC1-I|SNHG3-RCC1	NM_001048195	AGCGCCGGAGTTCCTTGTGGCCGACGTGCACCAAGGACAGGAAGATGTCA	chr1	28844744	28865708	+	N	N	N	N	II1	e0	-7.64	-5.86	1.78	0.0794796	-0.154764	-0.173222	0.576105	0.163351	0.123064	7.53913	7.61861	7.38437	7.36591
TRNAU1AP	tRNA selenocysteine 1 associated protein 1	54952	HGNC:30813|Ensembl:ENSG00000180098|HPRD:18035|Vega:OTTHUMG00000003653	PRO1902|RP4-669K10.4|SECP43|TRSPAP1	NM_017846	TCTAGCAGGTGTGGTAGGAGCACGCCCCAGAAGGTAGAATGTGGTGGGGT	chr1	28879528	28905057	+	N	N	N	N	II1	e0	-5.73	-6.83	-1.1	-0.0265838	-0.0686553	0.0626218	0.8904	0.630585	0.703575	7.04102	7.01444	6.97237	7.10365
SNHG12	small nucleolar RNA host gene 12 (non-protein coding)	85028	HGNC:30062|Ensembl:ENSG00000197989	C1orf79|LINC00100|NCRNA00100|RP4-669K10.5	NR_024127	GGACTTCCGGGGTAATGACAGTGATGAAATGCAGGGGACCTGGTTGCCCC	chr1	28905049	28908366	-	N	N	N	N	II1	e0	-6	-10.98	-4.98	0.409657	0.135377	-0.000999275	0.00330357	0.408599	0.997008	7.44269	7.85235	7.57807	7.4417
SNORD99	small nucleolar RNA, C/D box 99	692212	HGNC:32762|Ensembl:ENSG00000221539	HBII-420	NR_003077	AGTGGACATCCATGGATGAGAAATGCGGATATGGGACTGAGACCAGCTCC	chr1	28905254	28905334	-	N	N	N	N	II1	e0	-6.26	-15.43	-9.17	0.136231	-0.0967164	-0.0245557	0.215494	0.445087	0.914017	7.16628	7.30251	7.06956	7.14173
SNORA61	small nucleolar RNA, H/ACA box 61	677838	HGNC:32655|Ensembl:ENSG00000197989	ACA61	NR_002987	CTCCTGATCCCTTTCCCATCGGATCTGAACACTGGTCTTGGTGGTCGTAA	chr1	28906275	28906405	-	N	N	N	N	II1	e1	-8.17	-7.65	0.52	0.539441	0.429379	0.506937	0.000400718	0.00249852	0.00073298	8.67459	9.21403	9.10396	9.18152
SNORA16A	small nucleolar RNA, H/ACA box 16A	692073	HGNC:32605|Ensembl:ENSG00000197989	ACA16	NR_003035	GCATAGCTGCTGTGGTCAAAAAGGAGCCCAGAGTGACAGTTTTCCTTGAC	chr1	28907431	28907565	-	N	N	N	N	II1	e0	-8.17	-7.65	0.52	0.0969719	0.0316001	0.0915549	0.493651	0.876584	0.568221	6.91694	7.01391	6.94854	7.00849
RAB42	RAB42, member RAS oncogene family	115273	HGNC:28702|HPRD:14644	RP4-669K10.6	NM_152304	GAGAGAAACTTGGCCAGGAGTTTCCACTCGGTCCGACGCCCTCGGTGCCC	chr1	28918711	28921088	+	N	N	N	N	II1	e0	-3.83	-2.32	1.51	0.222626	0.10077	0.0761895	0.0379699	0.456483	0.650685	6.80275	7.02537	6.90352	6.87894
TAF12	TAF12 RNA polymerase II, TATA box binding protein (TBP)-associated factor, 20kDa	6883	HGNC:11545|MIM:600773|Ensembl:ENSG00000120656|HPRD:15981|Vega:OTTHUMG00000003655	TAF2J|TAFII20	NM_001135218	TTTATCGAGAGTGTGGTGACAGCAGCCTGTCAGCTTGCGCGGCATCGCAA	chr1	28929608	28969604	-	N	N	N	N	II1	e0	-4.12	-5.03	-0.91	-0.0671254	0.0286521	0.225999	0.815245	0.932146	0.233587	8.67329	8.60616	8.70194	8.89929
RNU11	RNA, U11 small nuclear	26824	HGNC:10108|Ensembl:ENSG00000270103	RNU11-1|U11	NR_004407	AGCATAATTTTTTGGTATTTGGGCAGCTGGTGATCGTTGGTCCCGGCGCC	chr1	28975111	28975246	+	N	N	N	N	II1	e0	-7.96	-5.1	2.86	-0.250902	-0.110797	-0.274147	0.0135432	0.354079	0.00897584	7.32824	7.07734	7.21744	7.05409
GMEB1	glucocorticoid modulatory element binding protein 1	10691	HGNC:4370|MIM:604409|Ensembl:ENSG00000162419|HPRD:16059|Vega:OTTHUMG00000003647	P96PIF|PIF96	NM_024482	TGGGCAGACCATCATTGAGATTGATCCAGCCCCGGACCCAGAAGCTGAAG	chr1	28995239	29042115	+	N	N	N	N	II1	e1	-2.79	-4.74	-1.95	0.618864	-0.0621204	-0.145263	9.5022e-05	0.772004	0.386995	7.85013	8.46899	7.78801	7.70487
YTHDF2	YTH domain family, member 2	51441	HGNC:31675|MIM:610640|Ensembl:ENSG00000198492|HPRD:06587|Vega:OTTHUMG00000003648	HGRG8|NY-REN-2	NM_001173128	GGAGAACACTTGAGTTGTGAAGGTTTTGGGCATCCACCCCAGAAAGTGGG	chr1	29063132	29096287	+	N	N	N	N	II1	e0	-7.16	-7.39	-0.23	-0.118551	-0.0840988	-0.192875	0.823462	0.88059	0.698728	10.1234	10.0048	10.0393	9.93048
OPRD1	opioid receptor, delta 1	4985	HGNC:8153|MIM:165195|Ensembl:ENSG00000116329|HPRD:01308|Vega:OTTHUMG00000003646	OPRD	NM_000911	TAGATGGGCATGGGGTGGGCCTCTGGTTTGGGGCGAGGCAGAGGACAGAT	chr1	29138653	29190208	+	N	N	N	N	II1	e0	-5.19	-4.61	0.58	-0.117647	-0.00816305	0.0554917	0.33244	0.970319	0.768978	6.88579	6.76815	6.87763	6.94129
EPB41	erythrocyte membrane protein band 4.1 (elliptocytosis 1, RH-linked)	2035	HGNC:3377|MIM:130500|Ensembl:ENSG00000159023|HPRD:00558|Vega:OTTHUMG00000003644	4.1R|EL1|HE	NM_004437	TTATAGGCTGTGGGCAGAGGGTCTGAAAGGTGGGCTTTGGGGTAGTGCCC	chr1	29213602	29446558	+	N	N	N	N	II1	e0	-4.4	-4.63	-0.23	-0.21945	-0.129817	-0.130065	0.0508983	0.315518	0.349903	7.81219	7.59274	7.68237	7.68212
TMEM200B	transmembrane protein 200B	399474	HGNC:33785|Ensembl:ENSG00000253304|HPRD:13188|Vega:OTTHUMG00000003658	TTMB	NM_001003682	CCTAAGACTGGGAGGTAGGTTGGGATGTTACAGGCTGGGGCAGGCTCCCT	chr1	29445936	29450421	-	N	N	N	N	II1	e0	-7.69	-4.01	3.68	0.13892	-0.00229887	0.140665	0.477624	0.993604	0.510876	6.75011	6.88903	6.74781	6.89077
SRSF4	serine/arginine-rich splicing factor 4	6429	HGNC:10786|MIM:601940|Ensembl:ENSG00000116350|HPRD:09052|Vega:OTTHUMG00000003663	SFRS4|SRP75	NM_005626	TGGCCTTTCCTACAGGGAGCTCAGTAACCTGGACGGCTCTAAGGCTGGAA	chr1	29474249	29508637	-	N	N	N	N	II1	e0	-6.55	-6.45	0.1	-0.0429881	0.163433	0.0690557	0.845081	0.219661	0.74378	11.278	11.2351	11.4415	11.3471
MECR	mitochondrial trans-2-enoyl-CoA reductase	51102	HGNC:19691|MIM:608205|Ensembl:ENSG00000116353|HPRD:12192|Vega:OTTHUMG00000059082	CGI-63|FASN2B|NRBF1	NM_016011	GGCATCTAGCAGGCAGAGTGAGTGCTGCTGTTAAACCCACCACAGGACAC	chr1	29519168	29557470	-	N	N	N	N	II1	e0	-5.69	-6.63	-0.94	0.0102769	-0.0161022	0.121071	0.95996	0.934098	0.281811	7.03613	7.04641	7.02003	7.1572
PTPRU	protein tyrosine phosphatase, receptor type, U	10076	HGNC:9683|MIM:602454|Ensembl:ENSG00000060656|HPRD:03908|Vega:OTTHUMG00000003699	FMI|PCP-2|PTP|PTP-J|PTP-PI|PTP-RO|PTPPSI|PTPRO|PTPU2|R-PTP-PSI|R-PTP-U|hPTP-J	NM_001195001	CTACTGACCTACCTCGCAGGGGGCTGTGGGGAGGCATAAGCTGATGTTTG	chr1	29563027	29653325	+	N	N	N	N	II1	e0	-6.29	-6.23	0.06	-0.243535	-0.244457	-0.224151	0.129781	0.131481	0.198212	7.45296	7.20942	7.2085	7.22881
MATN1	matrilin 1, cartilage matrix protein	4146	HGNC:6907|MIM:115437|Ensembl:ENSG00000162510|HPRD:00276|Vega:OTTHUMG00000003705	CMP|CRTM	NM_002379	GAGTGTGAGAGTGATAATGCAGGGGTGAGTGTGAGAGGGACTGCGTTTGC	chr1	31184123	31196432	-	N	N	N	N	II1	e0	-8.75	-5.82	2.93	-0.0133945	-0.0437139	-0.00774261	0.953365	0.812768	0.977428	6.95666	6.94326	6.91294	6.94891
MATN1-AS1	MATN1 antisense RNA 1	100129196	HGNC:40364|Ensembl:ENSG00000186056	-	NR_034182	ATGGCAGCCGAAGCTAAGGGATGGGGCTGCCGTCTCCCGTCTTGCTGTCC	chr1	31191618	31199593	+	N	N	N	N	II1	e0	-8.93	-6.42	2.51	-0.0199362	-0.0581478	-0.0229519	0.924755	0.720941	0.922541	6.7833	6.76336	6.72515	6.76035
LAPTM5	lysosomal protein transmembrane 5	7805	HGNC:29612|MIM:601476|Ensembl:ENSG00000162511|HPRD:03280|Vega:OTTHUMG00000003707	CLAST6	NM_006762	CCACAGGTTAGTTCAGTCAAAGCAGGCAACCCCCTTGTGGGCACTGACCC	chr1	31205314	31230683	-	N	N	N	N	II1	e1	-7.46	-6.33	1.13	0.171129	0.509915	0.533305	0.40831	0.00395388	0.00315447	9.59775	9.76888	10.1077	10.1311
SDC3	syndecan 3	9672	HGNC:10660|MIM:186357|HPRD:01719	SDCN|SYND3	NM_014654	AGAAAAAGGATGAGGGCAGCTACACGCTGGAGGAACCCAAGCAGGCGAGC	chr1	31342312	31381480	-	N	N	N	N	II1	e0	-6.21	-4.53	1.68	-0.0447037	0.0634196	0.038245	0.825529	0.722301	0.876173	6.77269	6.72799	6.83611	6.81094
PUM1	pumilio RNA-binding family member 1	9698	HGNC:14957|MIM:607204|Ensembl:ENSG00000134644|HPRD:06230|Vega:OTTHUMG00000003795	HSPUM|PUMH|PUMH1|PUML1	NM_001020658	CTGAGACGGGCAAGTGGTTGCTCCAGGATTACTCCCTCCTCCAAAAAAGG	chr1	31404352	31538564	-	N	N	N	N	II1	e0	-4.25	-5.22	-0.97	0.30873	0.202426	0.181691	0.0046612	0.0600331	0.107735	10.5673	10.8761	10.7698	10.749
SNORD103A	small nucleolar RNA, C/D box 103A	692234	HGNC:32766	U103	NR_004054	TGTCTGGCAATGATGACCCACTTGCCCTCACTGAGAACAAAGTTCGGTAA	chr1	31408535	31408623	-	N	N	N	N	II1	e0	-2.59	2.54	5.13	-0.115508	-0.0394813	-0.0874267	0.478895	0.866078	0.669669	6.9788	6.86329	6.93932	6.89137
SNORD85	small nucleolar RNA, C/D box 85	692200	HGNC:32744	HBII-251	NR_003066	TGCCCTCACTTAGACTATAGTTCACTGATGAGAGCATTGTTCTGAGCCAG	chr1	31441009	31441084	-	N	N	N	N	II1	e0	-1.66	-7.93	-6.27	-0.0220092	-0.0558637	-0.0248019	0.927751	0.775176	0.927565	6.79179	6.76978	6.73593	6.76699
NKAIN1	Na+/K+ transporting ATPase interacting 1	79570	HGNC:25743|MIM:612871|Ensembl:ENSG00000084628|HPRD:07786|Vega:OTTHUMG00000003788	FAM77C	NM_024522	CATTCCCTACTCTCTAAGGCCAAAATATCCTGAGCAAGGCTGGCAACCCC	chr1	31652591	31712734	-	N	N	N	N	II1	e0	-4.14	-3.88	0.26	0.0233253	-0.00784744	0.0175716	0.891817	0.966918	0.930196	6.67228	6.6956	6.66443	6.68985
SNRNP40	small nuclear ribonucleoprotein 40kDa (U5)	9410	HGNC:30857|MIM:607797|Ensembl:ENSG00000060688|HPRD:08481|Vega:OTTHUMG00000003790	40K|HPRP8BP|PRP8BP|PRPF8BP|RP11-490K7.3|SPF38|WDR57	NM_004814	TGCCCGGCCATGCTGGCTCCATCAATGAAGTGGCTTTCCACCCTGATGAG	chr1	31732414	31769644	-	N	N	N	N	II1	e0	-3.85	-3.49	0.36	0.110301	0.154789	0.212433	0.535938	0.323267	0.151103	10.028	10.1383	10.1828	10.2404
ZCCHC17	zinc finger, CCHC domain containing 17	51538	HGNC:30246|Ensembl:ENSG00000121766|HPRD:15189|Vega:OTTHUMG00000003791	HSPC251|PS1D|RP11-266K22.1|pNO40	NM_001282567	TGGACCCTTCCTATTGGTCTGTCCTGGGCCAACTGGTGGGTGATCTCTGC	chr1	31769828	31837800	+	N	N	N	N	II1	e0	-4.05	-3.6	0.45	-0.11785	0.165381	-0.0911877	0.501953	0.284547	0.677503	9.16676	9.04891	9.33214	9.07557
FABP3	fatty acid binding protein 3, muscle and heart (mammary-derived growth inhibitor)	2170	HGNC:3557|MIM:134651|HPRD:00613	FABP11|H-FABP|M-FABP|MDGI|O-FABP	NM_004102	GAGAGTGGGCAGAAATAACGGCCTGAAGGTTACTGAGGAAGAAGCACTGG	chr1	31838099	31845923	-	N	N	N	N	II1	e0	-4.45	-6.78	-2.33	0.0208353	-0.0196681	0.0200348	0.899198	0.900307	0.914082	6.61553	6.63636	6.59586	6.63556
SERINC2	serine incorporator 2	347735	HGNC:23231|MIM:614549|Ensembl:ENSG00000168528|HPRD:15481|Vega:OTTHUMG00000003796	PRO0899|TDE2|TDE2L	NM_178865	TGAGCCGGGCCTTCTAGTCGTAGTGCCTTCAGGGTCCGAGGAGCATCAGG	chr1	31885962	31907527	+	N	N	N	N	II1	e0	-5.81	-3.73	2.08	-0.0749236	-0.0772418	-0.0983429	0.618191	0.608683	0.505894	7.062	6.98708	6.98476	6.96366
LINC01225	predicted gene 853 pseudogene	149086	Ensembl:ENSG00000228682	-	NR_034112	GCAGCTGGATATGTAGGCCTCCTCAGGCAAAGGGGCGATCACCAGAACAC	chr1	31971838	31974167	+	N	N	N	N	II1	e0	-5.9	-7.12	-1.22	-0.0753998	-0.0316642	0.0377228	0.731168	0.90542	0.90339	6.94615	6.87075	6.91448	6.98387
TINAGL1	tubulointerstitial nephritis antigen-like 1	64129	HGNC:19168|Ensembl:ENSG00000142910|HPRD:07122|Vega:OTTHUMG00000003884	ARG1|LCN7|LIECG3|TINAGRP	NM_001204414	CCTCTGGCGCCCCCACTCAAGACTACCAAAGCCAGGACACCTCAAGTCTC	chr1	32042085	32053287	+	N	N	N	N	II1	e0	-6.01	-4.49	1.52	-0.0157736	-0.0349245	-0.097722	0.936596	0.835995	0.446232	6.65649	6.64071	6.62156	6.55876
HCRTR1	hypocretin (orexin) receptor 1	3061	HGNC:4848|MIM:602392|Ensembl:ENSG00000121764|HPRD:03863|Vega:OTTHUMG00000003876	OX1R	NM_001525	CGCTGCCAACCCCATCATCTACAACTTCCTCAGTGGCAAATTCCGGGAGC	chr1	32083300	32092919	+	N	N	N	N	II1	e0	-7.34	-6.81	0.53	0.0780192	-0.0124329	-0.0218011	0.648978	0.960746	0.936439	6.77018	6.8482	6.75775	6.74838
PEF1	penta-EF-hand domain containing 1	553115	HGNC:30009|MIM:610033|Ensembl:ENSG00000162517|HPRD:10143|Vega:OTTHUMG00000003877	ABP32|PEF1A	NM_012392	GCCACACCCATAAATCCTTGTGTGTTAACTTCTAGCTGCCTGGGGCTGGC	chr1	32095462	32110838	-	N	N	N	N	II1	e0	-7.39	-5.88	1.51	0.126037	0.16612	0.19415	0.355806	0.183731	0.119807	8.59755	8.72359	8.76367	8.7917
COL16A1	collagen, type XVI, alpha 1	1307	HGNC:2193|MIM:120326|Ensembl:ENSG00000084636|HPRD:00381|Vega:OTTHUMG00000003883	447AA	NM_001856	CCATGCCGATGGAGCAGCAGTACCCACCCATGAAAACCATGAAGGGGCCT	chr1	32117847	32169768	-	N	N	N	N	II1	e0	-6.51	-5.53	0.98	0.053146	0.106668	-0.0316665	0.857561	0.6483	0.931556	7.14338	7.19652	7.25005	7.11171
BAI2	brain-specific angiogenesis inhibitor 2	576	HGNC:944|MIM:602683|Ensembl:ENSG00000121753|HPRD:04063|Vega:OTTHUMG00000003885	-	NM_001703	AGAGCTGGAGCACCTTCAAATCTATGACACTGGGCTCGCTGCCCCCCAAG	chr1	32192717	32229648	-	N	N	N	N	II1	e0	-8.86	-6.51	2.35	-0.296287	-0.298914	-0.194314	0.0139751	0.0140572	0.135446	6.91052	6.61423	6.6116	6.7162
SPOCD1	SPOC domain containing 1	90853	HGNC:26338|Ensembl:ENSG00000134668|HPRD:08057|Vega:OTTHUMG00000003879	-	NM_001281988	TGAAGCCTGTTCCAGAGAGAGGTGGGACTGCAAGGAGAGGATGGTCAGCC	chr1	32256022	32281652	-	N	N	N	N	II1	e0	-5.79	-5	0.79	-0.108481	-0.0854982	-0.0786364	0.466143	0.608202	0.680056	6.77326	6.66478	6.68777	6.69463
PTP4A2	protein tyrosine phosphatase type IVA, member 2	8073	HGNC:9635|MIM:601584|Ensembl:ENSG00000184007|HPRD:03348|Vega:OTTHUMG00000003801	HH13|HH7-2|HU-PP-1|OV-1|PRL-2|PRL2|PTP4A|PTPCAAX2|ptp-IV1a|ptp-IV1b	NM_080391	GATGGAATAGAAGCCCTTGTTGCTGTAGATGTGCGTGCAGTCTGGCAGCC	chr1	32372021	32403988	-	N	N	N	N	II1	e2	-6.34	-7.32	-0.98	-0.31725	-0.65368	-0.713046	0.0206119	8.27203e-05	3.8171e-05	12.7527	12.4354	12.099	12.0396
KHDRBS1	KH domain containing, RNA binding, signal transduction associated 1	10657	HGNC:18116|MIM:602489|Ensembl:ENSG00000121774|HPRD:03926|Vega:OTTHUMG00000003921	Sam68|p62|p68	NR_073499	TCCATTTGAGATTCTGCACTCCATGAAAAGTTCACTTGGACGCTGGGGCC	chr1	32479294	32526460	+	N	N	N	N	II1	e0	-6.91	-6.38	0.53	-0.0334086	-0.255271	-0.123482	0.923096	0.162329	0.64487	12.05	12.0166	11.7947	11.9265
TMEM39B	transmembrane protein 39B	55116	HGNC:25510|Ensembl:ENSG00000121775|HPRD:07662|Vega:OTTHUMG00000004020	-	NM_018056	GCTGGAGGGCGCTGTCATTGTCTATCAGCTGTACTCCCTAATGTCCTCTG	chr1	32538502	32568467	+	N	N	N	N	II1	e0	-5.92	-5.94	-0.02	-0.0972691	-0.191456	-0.201135	0.64287	0.232424	0.226965	9.47102	9.37375	9.27956	9.26989
KPNA6	karyopherin alpha 6 (importin alpha 7)	23633	HGNC:6399|MIM:610563|Ensembl:ENSG00000025800|HPRD:09465|Vega:OTTHUMG00000004333	IPOA7|KPNA7	NM_012316	CACATCTCCTTCTGGCTCAGGTGAAATCCATGCCCTTCTGCTTATAGACC	chr1	32573643	32642168	+	N	N	N	N	II1	e0	-5.12	-5.04	0.08	-0.133276	0.0169877	-0.000924638	0.641327	0.968552	0.997967	9.54597	9.4127	9.56296	9.54505
TXLNA	taxilin alpha	200081	HGNC:30685|MIM:608676|Ensembl:ENSG00000084652|HPRD:09408|Vega:OTTHUMG00000004423	IL14|RP4-622L5.4|TXLN	NM_175852	GCTGCACTGGCAGCTTTTTTGTCTCCTTTGGGTATTCACAACAGCCAGGG	chr1	32645344	32663886	+	N	N	N	N	II1	e1	-8.5	-7.71	0.79	0.588874	0.51781	0.479323	0.00603129	0.0149162	0.0256847	10.4217	11.0106	10.9395	10.901
CCDC28B	coiled-coil domain containing 28B	79140	HGNC:28163|MIM:610162|Ensembl:ENSG00000160050|HPRD:14422|Vega:OTTHUMG00000005738	RP4-622L5.5	NM_024296	TAGGCGTCCCACGCAGGCCCACACTGCCCCTCTCATTCTCTTCAAACTGT	chr1	32666201	32670991	+	N	N	N	N	II1	e0	-8.99	-7.18	1.81	0.308758	0.819255	0.600348	0.603289	0.0585842	0.215957	9.23933	9.54809	10.0586	9.83968
IQCC	IQ motif containing C	55721	HGNC:25545|Ensembl:ENSG00000160051|HPRD:07683|Vega:OTTHUMG00000005739	RP4-622L5.6	NM_018134	GTGTGGCTAAGGAGTTACCTGGGGGAAGTAGAATGAGAGGTCTGTTGGGA	chr1	32671235	32674288	+	N	N	N	N	II1	e0	-6.42	-9.88	-3.46	0.513367	0.262936	0.066248	0.0700238	0.457831	0.915867	8.59336	9.10673	8.8563	8.65961
DCDC2B	doublecortin domain containing 2B	149069	HGNC:32576|Ensembl:ENSG00000222046|Vega:OTTHUMG00000005741	-	NM_001099434	TTGTTCCTCAGGAGCCAGCACCTCCGCTGGGCTCACAGGGTACACTGCGG	chr1	32674694	32681797	+	N	N	N	N	II1	e0	-6.71	-7.86	-1.15	0.0805657	0.0443417	0.0745384	0.679485	0.848601	0.74321	6.67294	6.7535	6.71728	6.74747
TMEM234	transmembrane protein 234	56063	HGNC:28837|Ensembl:ENSG00000160055|HPRD:15270|Vega:OTTHUMG00000005742	AASL548|C1orf91|PRO1105|RP4-622L5|dJ622L5.7	NM_019118	CCCACCACCATGCCCCATGCTCACTGGCTCATTTCTTGGGAGGGCTTAGA	chr1	32681797	32687926	-	N	N	N	N	II1	e0	-8.4	-9.88	-1.48	0.35482	0.388837	0.242365	0.000955767	0.000449987	0.0165405	7.05291	7.40773	7.44175	7.29528
EIF3I	eukaryotic translation initiation factor 3, subunit I	8668	HGNC:3272|MIM:603911|Ensembl:ENSG00000084623|HPRD:04884|Vega:OTTHUMG00000007364	EIF3S2|PRO2242|TRIP-1|TRIP1|eIF3-beta|eIF3-p36	NM_003757	ATCCTGATGGCAAGAGCTACAGCAGCGGCGGCGAAGATGGTTACGTCCGT	chr1	32687970	32697205	+	N	N	N	N	II1	e0	-7.21	-9.56	-2.35	0.191986	0.337626	0.305454	0.316884	0.0453853	0.0810279	11.8222	12.0141	12.1598	12.1276
MTMR9LP	myotubularin related protein 9-like, pseudogene	339483	HGNC:27920|HPRD:14168	MTMR9L	NR_026850	GCAGAAGCTGCATGGGGGAAGAGTGTGGCAAATAGTGACAGGAAGGGAGA	chr1	32697260	32707311	-	N	N	N	N	II1	e0	-6.48	-6.63	-0.15	-0.0182358	-0.142046	0.0827896	0.940446	0.295652	0.660029	6.97187	6.95363	6.82982	7.05466
FAM167B	family with sequence similarity 167, member B	84734	HGNC:28133|Ensembl:ENSG00000183615|HPRD:14401|Vega:OTTHUMG00000007462	C1orf90	NM_032648	CAGAGGCACCAGCTCCTGGCGGGGGAGGAGGAACATTCAGGTTTCTGAGA	chr1	32712817	32714461	+	N	N	N	N	II1	e0	-9.96	-8.69	1.27	-0.0287659	-0.0076555	-0.0121818	0.911661	0.976847	0.969283	6.78416	6.7554	6.77651	6.77198
LCK	lymphocyte-specific protein tyrosine kinase	3932	HGNC:6524|MIM:153390|Ensembl:ENSG00000182866|HPRD:01080|Vega:OTTHUMG00000007463	LSK|YT16|p56lck|pp58lck	NM_005356	TGAGACTGTCCAGGCAGCCAGGTTAGGCCAGGAGGACCATGTGAATGGGG	chr1	32716839	32751768	+	N	N	N	N	II1	e0	-7.87	-7.05	0.82	0.157639	0.433548	0.183951	0.632362	0.0649135	0.591426	7.8702	8.02784	8.30375	8.05415
HDAC1	histone deacetylase 1	3065	HGNC:4852|MIM:601241|Ensembl:ENSG00000116478|HPRD:03143|Vega:OTTHUMG00000007529	GON-10|HD1|RPD3|RPD3L1	NM_004964	TTTCGTACCTTCCCACTGGCCTCAAGTGAGCCAAGAAACACTGCCTGCCC	chr1	32757707	32799224	+	N	N	N	N	II1	e0	-5.88	-5.92	-0.04	0.0572147	0.038821	0.0631352	0.857453	0.906243	0.859162	12.5855	12.6427	12.6243	12.6486
MARCKSL1	MARCKS-like 1	65108	HGNC:7142|MIM:602940|Ensembl:ENSG00000175130|HPRD:04247|Vega:OTTHUMG00000007589	F52|MACMARCKS|MLP|MLP1|MRP	NR_052852	CCTGAGCCAGAAGTGGGGTGCTTATACTCCCAAACCTTGAGTGTCCAGCC	chr1	32799429	32801840	-	N	N	N	N	II1	e0	-8.59	-5.07	3.52	-0.433475	-0.305545	-0.218864	0.0032549	0.0323642	0.160023	12.3384	11.905	12.0329	12.1196
TSSK3	testis-specific serine kinase 3	81629	HGNC:15473|MIM:607660|Ensembl:ENSG00000162526|HPRD:09635|Vega:OTTHUMG00000007585	SPOGA3|STK22C|STK22D|TSK3	NM_052841	GCATGGGTGTGGTCCTGTATGTCATGCTCTGTGCCAGCCTACCTTTTGAC	chr1	32827861	32829924	+	N	N	N	N	II1	e0	-6.06	-8.9	-2.84	-0.0313009	0.00348961	0.0241292	0.880174	0.987515	0.921285	6.75517	6.72387	6.75866	6.7793
BSDC1	BSD domain containing 1	55108	HGNC:25501|Ensembl:ENSG00000160058|HPRD:07658|Vega:OTTHUMG00000007588	-	NM_001143889	CCAATGAGTGAAAGGGATCGTGGGTCAGGGACACCGAGAGAGTGAGGTCA	chr1	32830704	32860062	-	N	N	N	N	II1	e0	-6.43	-6	0.43	-0.0962578	0.149837	0.102584	0.586106	0.314137	0.592177	9.09483	8.99857	9.24466	9.19741
ZBTB8B	zinc finger and BTB domain containing 8B	728116	HGNC:37057|Ensembl:ENSG00000215897|Vega:OTTHUMG00000167087	RP1-27O5.1|ZNF916B	NM_001145720	ATCATCTGCAAGGGCTGCAGGAGAACATTCACGAGTCACCTGTCCCAGGG	chr1	32930657	32953459	+	N	N	N	N	II1	e0	-3.51	-5.35	-1.84	0.0813114	0.011046	0.02662	0.569684	0.961	0.910224	6.62011	6.70142	6.63116	6.64673
ZBTB8A	zinc finger and BTB domain containing 8A	653121	HGNC:24172|Ensembl:ENSG00000160062|HPRD:10315|Vega:OTTHUMG00000007855	BOZF1|ZBTB8|ZNF916A	NM_001040441	CCTATGTGGAGATTGTAGAAGATGGGTCTGGTGATCTGGTCATCCAACAG	chr1	33004771	33071542	+	N	N	N	N	II1	e0	-3.46	-4.2	-0.74	-0.134781	-0.0117971	-0.0665985	0.676687	0.979443	0.887604	7.20094	7.06616	7.18915	7.13435
ZBTB8OS	zinc finger and BTB domain containing 8 opposite strand	339487	HGNC:24094|HPRD:12470	ARCH|ARCH2	NM_178547	CGATCAATTGGGTGGGGAGAAGAATTTTCATTGTCCAAGCACCCTCAGGG	chr1	33087306	33116185	-	N	N	N	N	II1	e0	-6.47	-6.81	-0.34	-0.313889	-0.44645	-0.188298	0.0256869	0.00255215	0.250103	8.39034	8.07646	7.94389	8.20205
RBBP4	retinoblastoma binding protein 4	5928	HGNC:9887|MIM:602923|Ensembl:ENSG00000162521|HPRD:04232|Vega:OTTHUMG00000007998	NURF55|RBAP48	NM_001135255	TCCTCTAGCCCTGGACTACTAGTACCGAAGTCACTAGTCACATAGGACTC	chr1	33116748	33151812	+	N	N	N	N	II1	e0	-4.66	-5.25	-0.59	-0.412894	-0.332437	-0.33191	0.008833	0.0344841	0.0378883	10.1795	9.76665	9.84711	9.84763
SYNC	syncoilin, intermediate filament protein	81493	HGNC:28897|MIM:611750|Ensembl:ENSG00000162520|HPRD:18134	SYNC1|SYNCOILIN	NM_030786	GGAGGACCAGATCGCACTTGTGAGGCAAAAACGAGATGAAGAGGTGCAGC	chr1	33145506	33168361	-	N	N	N	N	II1	e0	-6.09	-5.17	0.92	-0.0413279	0.0405212	0.0785114	0.834869	0.833537	0.652439	6.69994	6.65861	6.74046	6.77845
KIAA1522	KIAA1522	57648	HGNC:29301|Ensembl:ENSG00000162522|Vega:OTTHUMG00000008088	-	NM_020888	CTGAGCTTGTTTCCCTGCTGGGTGGGACAGAGGACAAAGGAGAAGGGAGG	chr1	33207511	33240571	+	N	N	N	N	II1	e0	-7.79	-6.72	1.07	-0.0680195	-0.00626691	0.102389	0.616701	0.974971	0.411922	7.01546	6.94744	7.00919	7.11785
YARS	tyrosyl-tRNA synthetase	8565	HGNC:12840|MIM:603623|Ensembl:ENSG00000134684|HPRD:09153|Vega:OTTHUMG00000003933	CMTDIC|TYRRS|YRS|YTS	NM_003680	GGGTGGGGTACTTCTCCATAAGGCATCTCAGTCAAATCCCCATCACTGTC	chr1	33240839	33283633	-	N	N	N	N	II1	e0	-6.1	-5.36	0.74	-0.484362	-0.218898	-0.313014	0.000257001	0.0611613	0.00871181	11.5019	11.0176	11.283	11.1889
S100PBP	S100P binding protein	64766	HGNC:25768|MIM:611889|Ensembl:ENSG00000116497|HPRD:07803|Vega:OTTHUMG00000003955	S100PBPR	NM_001256121	CCTGACAGTGAGAACCCTACGTCTGTATTCTCTCGGATCTCAGACCATTC	chr1	33283042	33324480	+	N	N	N	N	II1	e0	-5.2	-4.96	0.24	-0.403475	-0.238492	-0.178219	0.0108168	0.15062	0.367258	7.94532	7.54185	7.70683	7.7671
FNDC5	fibronectin type III domain containing 5	252995	HGNC:20240|MIM:611906|Ensembl:ENSG00000160097|HPRD:17009|Vega:OTTHUMG00000004015	FRCP2|irisin	NM_001171940	TGGGAGGGCATGAGGCTCCACTCATTGTCTTGTGACTTCCATCCCTGCTG	chr1	33327868	33336414	-	N	N	N	N	II1	e0	-7.68	-6.6	1.08	0.0905138	0.00141019	0.0757326	0.535678	0.99445	0.668665	6.70087	6.79139	6.70228	6.77661
HPCA	hippocalcin	3208	HGNC:5144|MIM:142622|Ensembl:ENSG00000121905|HPRD:00811|Vega:OTTHUMG00000004017	BDR2	NM_002143	CCCATAGACAGATGGGCAGATGCACCCAGAGCCCCATGCACAGTGTCCTG	chr1	33352097	33360247	+	N	N	N	N	II1	e0	-8.19	-5.92	2.27	0.00289773	-0.0651528	-0.109634	0.988499	0.646994	0.375037	6.8144	6.8173	6.74925	6.70477
TMEM54	transmembrane protein 54	113452	HGNC:24143|Ensembl:ENSG00000121900|HPRD:12524|Vega:OTTHUMG00000004016	BCLP|CAC-1|CAC1	NM_033504	TCTGACCCTCTGAGAGATGATGTCCTGCCCAGGCCCGATGGCCACTAGGA	chr1	33360195	33366953	-	N	N	N	N	II1	e0	-7.52	-5.99	1.53	-0.0581946	0.0402262	0.141377	0.765738	0.850613	0.337907	7.32504	7.26685	7.36527	7.46642
RNF19B	ring finger protein 19B	127544	HGNC:26886|MIM:610872|Ensembl:ENSG00000116514|HPRD:13725|Vega:OTTHUMG00000004013	IBRDC3|NKLAM	NM_001127361	GCCCATATGAACCTCTCTGCCCTAGCCGAGGGACAAACTGTCTTGAAGCC	chr1	33402049	33430286	-	N	N	N	N	II1	e0	-7.28	-6.26	1.02	-0.292457	-0.00695889	0.304537	0.271182	0.988591	0.277068	7.84654	7.55408	7.83958	8.15108
AK2	adenylate kinase 2	204	HGNC:362|MIM:103020|Ensembl:ENSG00000004455|HPRD:00047|Vega:OTTHUMG00000004131	ADK2|AK 2	NM_001199199	CCATCCCTGTGAGGCAATGGGTGGGAATGATAGGACAGGCAAAGAGAAGC	chr1	33473540	33502512	-	N	N	N	N	II1	e0	-6	-5.2	0.8	-0.0544068	0.226813	0.28782	0.820354	0.109503	0.0400755	9.89427	9.83986	10.1211	10.1821
ADC	arginine decarboxylase	113451	HGNC:29957|MIM:608353|Ensembl:ENSG00000142920|HPRD:17657|Vega:OTTHUMG00000004130	AZI2|ODC-p|ODC1L	NM_052998	ACCCCCGCGCTCCACCTGCAGTGTTTCTGCCCTGTAAATAGGACCAGTCT	chr1	33546713	33585995	+	N	N	N	N	II1	e0	-7.02	-5.34	1.68	-0.229037	-0.116504	-0.199084	0.0282401	0.341288	0.0665303	7.06681	6.83778	6.95031	6.86773
TRIM62	tripartite motif containing 62	55223	HGNC:25574|Ensembl:ENSG00000116525|HPRD:07697|Vega:OTTHUMG00000004132	DEAR1	NM_018207	CTGCCCAGAGGTGGGAACTGGAGGAGTGGGCTGCAAGACTGAGCCTAAAT	chr1	33611002	33647671	-	N	N	N	N	II1	e0	-7.13	-6.79	0.34	0.165909	0.130947	0.284749	0.390807	0.547595	0.0941845	6.8923	7.05821	7.02325	7.17705
ZNF362	zinc finger protein 362	149076	HGNC:18079|Ensembl:ENSG00000160094|HPRD:13394|Vega:OTTHUMG00000004124	RN|lin-29	NM_152493	TTCTCTGCCCCCACCCCCGGCCCTTTGTTTGACTTGCGTCGTCTGATACT	chr1	33722173	33766320	+	N	N	N	N	II1	e2	-5.94	-5.3	0.64	-0.504451	-0.413301	-0.451572	0.000266977	0.00140917	0.000741445	9.23844	8.73399	8.82514	8.78687
A3GALT2	alpha 1,3-galactosyltransferase 2	127550	HGNC:30005|Ensembl:ENSG00000184389|Vega:OTTHUMG00000004125	A3GALT2P|IGBS3S	NM_001080438	TCTTCTGGCTGCACAAGCCCGCCAAGGTGCTGTCGCCCGAGTTCTGCTGG	chr1	33772366	33786699	-	N	N	N	N	II1	e0	-6.87	-5.95	0.92	-0.0272988	-0.0318198	-0.104194	0.93697	0.924941	0.71182	6.78984	6.76254	6.75802	6.68565
PHC2	polyhomeotic homolog 2 (Drosophila)	1912	HGNC:3183|MIM:602979|Ensembl:ENSG00000134686|HPRD:10340|Vega:OTTHUMG00000004133	EDR2|HPH2|PH2	NM_198040	TGCACAAGCCTGGCGGCAGTCAGCAGTGTCACCCTCCCACACCTGATACT	chr1	33789223	33841194	-	N	N	N	N	II1	e0	-7.36	-5.93	1.43	0.0149235	-0.0249276	0.0105312	0.950637	0.910832	0.970391	6.64991	6.66483	6.62498	6.66044
ZSCAN20	zinc finger and SCAN domain containing 20	7579	HGNC:13093|MIM:611315|Ensembl:ENSG00000121903|HPRD:15769|Vega:OTTHUMG00000004173	KOX29|ZFP-31|ZNF31|ZNF360	NM_145238	CTCGCACTGGTCACACATCTGTAAGTGGGAGAGGCAGGATTCAACAGATC	chr1	33938231	33961995	+	N	N	N	N	II1	e0	-4.67	-4.17	0.5	0.0991635	0.149694	0.226886	0.388866	0.137332	0.0209521	6.68324	6.7824	6.83293	6.91012
CSMD2	CUB and Sushi multiple domains 2	114784	HGNC:19290|MIM:608398|Ensembl:ENSG00000121904|HPRD:13094|Vega:OTTHUMG00000011135	dJ1007G16.1|dJ1007G16.2|dJ947L8.1	NM_052896	GTCTCTGTATATGAGGCTTCCCCCTGGGGTCCTGCATTATGGTACTTTCC	chr1	33979598	34631443	-	Y	Y	Y	Y	AMB1	e0	-2.91	-2.24	0.67	0.0345196	-0.0483283	0.0239391	0.849334	0.761848	0.914564	6.84468	6.8792	6.79635	6.86862
HMGB4	high mobility group box 4	127540	HGNC:24954|Ensembl:ENSG00000176256|HPRD:14038|Vega:OTTHUMG00000013143	dJ1007G16.5	NR_033264	GCCAAGGCCACAGGGAAGATGTGGTCAACAGCGACAGACCTGGAGAAGCA	chr1	34329679	34330392	+	N	N	N	N	II1	e0	-0.23	-4.21	-3.98	-0.105194	-0.077662	-0.0602389	0.270071	0.474928	0.652298	6.69882	6.59362	6.62115	6.63858
C1orf94	chromosome 1 open reading frame 94	84970	HGNC:28250|Ensembl:ENSG00000142698|HPRD:11310|Vega:OTTHUMG00000004012	-	NM_001134734	GGCCAACACTGACACAAAAATAGCCCTCCTCACACATGGCACAAGCTACA	chr1	34642552	34684731	+	N	N	N	N	II1	e0	-4.8	-4.28	0.52	-0.00594435	-0.105552	-0.0303628	0.9801	0.453835	0.902591	6.7358	6.72986	6.63025	6.70544
GJB5	gap junction protein, beta 5, 31.1kDa	2709	HGNC:4287|MIM:604493|Ensembl:ENSG00000189280|HPRD:06840|Vega:OTTHUMG00000004053	CX31.1	NM_005268	CTAGAATGGAAATAGTGAGGGCCAATGCCCAGGGTTGGAGGGAGGAGGGC	chr1	35220647	35224113	+	N	N	N	N	II1	e0	-5.57	-1.3	4.27	0.0126363	0.0799936	0.112179	0.9578	0.619064	0.457398	6.64216	6.65479	6.72215	6.75434
GJB4	gap junction protein, beta 4, 30.3kDa	127534	HGNC:4286|MIM:605425|Ensembl:ENSG00000189433|HPRD:05666|Vega:OTTHUMG00000004052	CX30.3|EKV	NM_153212	ACCCAGGAAAAAAGGCAGGGGCAGTGGCATCCTTGCCGTAGCAGGGTGGT	chr1	35225341	35229325	+	N	N	N	N	II1	e0	-4.43	-4.12	0.31	0.0207207	-0.12969	-0.153958	0.925203	0.302582	0.217679	6.96735	6.98807	6.83766	6.81339
GJB3	gap junction protein, beta 3, 31kDa	2707	HGNC:4285|MIM:603324|Ensembl:ENSG00000188910|HPRD:04505|Vega:OTTHUMG00000004051	CX31|DFNA2|DFNA2B|EKV	NM_001005752	TAAGGCATCTCTACTCCCTCCAGAGGAGCCGCCCAGATTCCTGCAGTGGA	chr1	35247910	35251967	+	N	N	N	N	II1	e0	-8.35	-6.69	1.66	0.0409187	0.0800148	0.0942193	0.795005	0.514396	0.445826	6.62919	6.67011	6.70921	6.72341
GJA4	gap junction protein, alpha 4, 37kDa	2701	HGNC:4278|MIM:121012|Ensembl:ENSG00000187513|HPRD:08509|Vega:OTTHUMG00000004050	CX37	NM_002060	AGCTGATCCAGAGGAACCCAGAGCCAACTTACCCCAACCTCACCCTATGG	chr1	35258598	35261348	+	N	N	N	N	II1	e0	-6.45	-3.8	2.65	-0.140217	-0.0316364	-0.123251	0.21791	0.86882	0.338591	6.79628	6.65607	6.76465	6.67303
SMIM12	small integral membrane protein 12	113444	HGNC:25154|HPRD:14002	C1orf212	NM_138428	GCTGGACATTTGAATTGTTTCTGGTTGGTCACTCGTTTAGATACTGCAAC	chr1	35315962	35325417	-	N	N	N	N	II1	e0	-4.43	-8.29	-3.86	0.0399151	0.0315699	0.0999618	0.887356	0.911302	0.668929	7.3769	7.41682	7.40847	7.47687
DLGAP3	discs, large (Drosophila) homolog-associated protein 3	58512	HGNC:30368|MIM:611413|Ensembl:ENSG00000116544|Vega:OTTHUMG00000004049	DAP3|SAPAP3	NM_001080418	TGGCTTTTTATGAAGAATCCCGAACCCTGCCTAGGAGCCCGCCCCACCCT	chr1	35331036	35370984	-	N	N	N	N	II1	e0	-6.16	-7.09	-0.93	0.0986056	0.0196512	0.0475477	0.620302	0.947426	0.873536	6.71175	6.81036	6.7314	6.7593
LOC653160	uncharacterized LOC653160	653160	Ensembl:ENSG00000241014	-	NR_037869	TGCCAGCCAACGTGGCGGCCCTGGCAATGTTCATCCGCAGCGGCGGGCGC	chr1	35441299	35444307	-	N	N	N	N	II1	e0	-3.11	-4.87	-1.76	0.183958	0.0406904	0.0763866	0.141515	0.848224	0.699227	6.68505	6.86901	6.72574	6.76144
ZMYM6	zinc finger, MYM-type 6	9204	HGNC:13050|MIM:613567|Ensembl:ENSG00000163867|HPRD:10325|HPRD:17494|Vega:OTTHUMG00000004163	Buster2|MYM|ZNF198L4|ZNF258	NM_007167	ATCCAGGGTCAGCCAGTGTTGAAAGAGACATTTTGTCTACCTGGCACTGC	chr1	35451766	35497569	-	N	N	N	N	II1	e0	-5.97	-5.53	0.44	-0.0285329	0.133676	0.173441	0.93276	0.553041	0.422002	9.25503	9.22649	9.3887	9.42847
ZMYM1	zinc finger, MYM-type 1	79830	HGNC:26253|Ensembl:ENSG00000197056|HPRD:15739|Vega:OTTHUMG00000004374	MYM|RP11-181E22.4	NM_001289088	GCCATCTATAAGGATTGTGCCAGTTTACAGTCCCACCCACAATGCATGAG	chr1	35525386	35581459	+	N	N	N	N	II1	e0	-4.55	-4.42	0.13	-0.0762052	-0.283458	-0.216945	0.503185	0.00231421	0.0163713	8.25722	8.18101	7.97376	8.04027
SFPQ	splicing factor proline/glutamine-rich	6421	HGNC:10774|MIM:605199|Ensembl:ENSG00000116560|HPRD:07284|Vega:OTTHUMG00000004157	POMP100|PSF	NM_005066	AGATTGTGGAATGGGTGTAAGACAATTGGTAGGGGGTGAAAGTGGGTTTG	chr1	35649200	35658743	-	N	N	N	N	II1	e0	-6.73	-7.94	-1.21	0.282718	-0.113683	-0.145282	0.0214368	0.466174	0.336983	8.45207	8.73478	8.33838	8.30678
ZMYM4	zinc finger, MYM-type 4	9202	HGNC:13055|MIM:613568|Ensembl:ENSG00000146463|HPRD:10326|Vega:OTTHUMG00000004241	CDIR|MYM|ZNF198L3|ZNF262	NM_005095	CTGTATCAGGATTTCATTTGCATGTTAGTCCACAGAGTTGCCCAGAACCC	chr1	35734567	35887545	+	N	N	N	N	II1	e0	-3.61	-3.73	-0.12	-0.319058	-0.181476	-0.196688	0.0581342	0.360612	0.340486	8.77517	8.45611	8.59369	8.57848
KIAA0319L	KIAA0319-like	79932	HGNC:30071|MIM:613535|Ensembl:ENSG00000142687|HPRD:11164|Vega:OTTHUMG00000004370	-	NM_024874	TGGATGCCACGGATCAGGAAAGCCTGGAGCTGAAGCCAACCTCCCGAGCA	chr1	35899090	36023037	-	N	N	N	N	II1	e0	-4.02	-3.84	0.18	-0.245988	-0.152962	-0.1515	0.0882966	0.363672	0.406173	7.33792	7.09193	7.18496	7.18642
NCDN	neurochondrin	23154	HGNC:17597|MIM:608458|Ensembl:ENSG00000020129|HPRD:10530|Vega:OTTHUMG00000059204	-	NM_014284	ACCGTGGTGCCTGGCTTTAACTCCCACCCCTGCTATGACTCCTCTCTGCA	chr1	36023392	36032380	+	N	N	N	N	II1	e0	-7.46	-7.16	0.3	0.132967	0.065669	0.149053	0.414307	0.758345	0.378763	7.10406	7.23703	7.16973	7.25311
TFAP2E	transcription factor AP-2 epsilon (activating enhancer binding protein 2 epsilon)	339488	HGNC:30774|MIM:614428|Ensembl:ENSG00000116819|HPRD:18174|Vega:OTTHUMG00000004388	AP2E	NM_178548	GAGGTGCTACTGAGGAGTTGGTGCCCCTCATTCCAGAATCTCCTACCCCC	chr1	36038970	36060927	+	N	N	N	N	II1	e0	-7.29	-4.17	3.12	0.0203031	0.0384204	0.0904815	0.936313	0.864261	0.634981	6.90737	6.92767	6.94579	6.99785
PSMB2	proteasome (prosome, macropain) subunit, beta type, 2	5690	HGNC:9539|MIM:602175|HPRD:03708	HC7-I	NM_001199779	TGCAGCCCACGGCTATGGTGCCTTCCTGACTCTCAGTATCCTCGACCGAT	chr1	36065142	36107152	-	N	N	N	N	II1	e0	-5.21	-4.53	0.68	0.110796	0.208038	0.0388151	0.531248	0.142329	0.894574	12.0447	12.1555	12.2528	12.0836
C1orf216	chromosome 1 open reading frame 216	127703	HGNC:26800|Ensembl:ENSG00000142686|HPRD:08798|Vega:OTTHUMG00000004167	-	NM_152374	AAGTCACTGATGCAGCCTCTGGCCCTCAGTCTCCCTATCGGCAAAGTGGG	chr1	36179476	36184790	-	N	N	N	N	II1	e0	-8.41	-5.69	2.72	-0.0326162	0.0623458	-0.0587157	0.889687	0.74522	0.79623	7.4728	7.44018	7.53514	7.41408
CLSPN	claspin	63967	HGNC:19715|MIM:605434|Ensembl:ENSG00000092853|HPRD:09257|Vega:OTTHUMG00000004168	-	NM_001190481	GCTGAGGCGGCAAAGGAATCGTCTAAGTCTCAGGTAAAGAAAAGGGGTCC	chr1	36197712	36235551	-	N	N	N	N	II1	e0	-5.28	-5.73	-0.45	-0.135051	-0.0913426	0.0844486	0.301477	0.558856	0.632007	7.1866	7.05155	7.09526	7.27105
AGO4	argonaute RISC catalytic component 4	192670	HGNC:18424|MIM:607356|Ensembl:ENSG00000134698|HPRD:09559|Vega:OTTHUMG00000004243	EIF2C4	NM_017629	GGCCTGGAGCCACACTCTATATGGCTGAGGAAGGAGCTAGGGAAAGAGAT	chr1	36273827	36323490	+	N	N	N	N	II1	e0	-3.94	-2.31	1.63	-0.178861	-0.0609467	0.0629681	0.0464605	0.639326	0.655672	6.95355	6.77469	6.89261	7.01652
AGO1	argonaute RISC catalytic component 1	26523	HGNC:3262|MIM:606228|Ensembl:ENSG00000092847|HPRD:06942|Vega:OTTHUMG00000007381	EIF2C|EIF2C1|GERP95|Q99	NM_012199	TCCCTCTCAAGTCCAGCATGGATGGGGAAATGTCTCTGGATCCCCACAGC	chr1	36348809	36389899	+	N	N	N	N	II1	e1	-5.22	-5.04	0.18	0.23777	0.364996	0.515147	0.143975	0.0200227	0.00205425	8.10722	8.34499	8.47222	8.62237
AGO3	argonaute RISC catalytic component 3	192669	HGNC:18421|MIM:607355|Ensembl:ENSG00000126070|HPRD:09558|Vega:OTTHUMG00000184172	EIF2C3	NM_177422	TCTACCCCCACTACCGCCTTTATTTCTCTATTTCCCTTGCCTTCATCACC	chr1	36396682	36522063	+	N	N	N	N	II1	e0	-3.54	-3.18	0.36	0.456516	0.291397	0.338065	9.21436e-05	0.00381878	0.00135768	7.32582	7.78234	7.61722	7.66389
TEKT2	tektin 2 (testicular)	27285	HGNC:11725|MIM:608953|Ensembl:ENSG00000092850|HPRD:16410|Vega:OTTHUMG00000007629	TEKTB1|TEKTIN-T|h-tektin-t	NM_014466	ACAGTACGGCCTCACCGACGAGGTTCACCAGCTAGAGGCAACCATCGCTG	chr1	36549675	36553876	+	N	N	N	N	II1	e0	-8.4	-6.83	1.57	-0.0164387	0.0246601	-0.1193	0.946578	0.914458	0.445166	6.97162	6.95519	6.99628	6.85232
ADPRHL2	ADP-ribosylhydrolase like 2	54936	HGNC:21304|MIM:610624|Ensembl:ENSG00000116863|HPRD:12432|Vega:OTTHUMG00000007628	ARH3	NM_017825	GACAGACGCAGGCGGGTTTATTTTGGAGGGGTACTTGTGGCATTTTCCTG	chr1	36554452	36559533	+	N	N	N	N	II1	e1	-10.69	-10.33	0.36	0.546127	0.332137	0.254028	0.00648488	0.102801	0.274814	9.23379	9.77992	9.56593	9.48782
COL8A2	collagen, type VIII, alpha 2	1296	HGNC:2216|MIM:120252|Ensembl:ENSG00000171812|HPRD:08347|Vega:OTTHUMG00000007665	FECD|FECD1|PPCD|PPCD2	NM_005202	AGCTTCTGCCAAATTTCATTCCTCAAACCTTTCAGGAGGGGTGGTTGGCG	chr1	36560843	36565850	-	N	N	N	N	II1	e0	-6.71	-7.21	-0.5	0.0891117	0.0137584	0.0726429	0.390403	0.938837	0.56061	6.75056	6.83967	6.76432	6.8232
TRAPPC3	trafficking protein particle complex 3	27095	HGNC:19942|MIM:610955|Ensembl:ENSG00000054116|HPRD:11644|Vega:OTTHUMG00000007664	BET3	NR_073098	TGGGAAGCCACCCAGGTCTCATTCCTCCCTGCTGTTGGAGGCAACATCTC	chr1	36602169	36615115	-	N	N	N	N	II1	e0	-6.26	-6.31	-0.05	-0.326577	-0.0817471	-0.231437	0.0126067	0.672384	0.0924016	9.92145	9.59487	9.8397	9.69001
MAP7D1	MAP7 domain containing 1	55700	HGNC:25514|Ensembl:ENSG00000116871|HPRD:07666|Vega:OTTHUMG00000007714	PARCC1|RPRC1	NM_018067	GGTACCCATGCCCCCTGCCCTCGCCTGGAATCAGTGTTACTGCATCTGAT	chr1	36621565	36646451	+	N	N	N	N	II1	e0	-8.04	-5.77	2.27	-0.00121455	0.385404	0.248964	0.997895	0.19429	0.515868	10.9896	10.9884	11.375	11.2386
THRAP3	thyroid hormone receptor associated protein 3	9967	HGNC:22964|MIM:603809|Ensembl:ENSG00000054118|HPRD:07543|Vega:OTTHUMG00000007866	TRAP150	NM_005119	GGCCCAGGGGTCAGGCCCAGCTTTTGAGCAGAATACAACGCATTGGGCTT	chr1	36690016	36770957	+	N	N	N	N	II1	e0	-6.49	-5.85	0.64	-0.010717	0.0287814	-0.0824423	0.965393	0.888737	0.623053	8.77155	8.76084	8.80033	8.68911
SH3D21	SH3 domain containing 21	79729	HGNC:26236|Ensembl:ENSG00000214193|HPRD:08011|Vega:OTTHUMG00000007868	C1orf113	NM_001162530	AGGAGGAAAGGGGGAGAGGAAATTGCAGACATAGCTGAAGGCGCTGCCTG	chr1	36771993	36786948	+	N	N	N	N	II1	e0	-7.51	-7.18	0.33	-0.0356001	-0.0155817	-0.0346603	0.844384	0.940191	0.869023	6.8943	6.8587	6.87872	6.85964
EVA1B	eva-1 homolog B (C. elegans)	55194	HGNC:25558|Ensembl:ENSG00000142694|HPRD:07690|Vega:OTTHUMG00000007867	C1orf78|FAM176B|RP11-268J15.2	NM_018166	ACATGAGCTCAGAGCTACCCCACACCTTCGGACTGCCTCGGCCCCCACAG	chr1	36787631	36789755	-	N	N	N	N	II1	e0	-7.89	-3.17	4.72	-0.0125047	0.098635	-0.0323395	0.965848	0.586897	0.91157	7.00176	6.98926	7.10039	6.96942
STK40	serine/threonine kinase 40	83931	HGNC:21373|MIM:609437|Ensembl:ENSG00000196182|HPRD:11359|Vega:OTTHUMG00000008238	SHIK|SgK495	NM_032017	GACAGACTGGGCCCTTCCAAGGTCAAGCCATGTGTCTGATGACATTCCTG	chr1	36805219	36851528	-	N	N	N	N	II1	e0	-8.07	-6.03	2.04	0.100195	0.228679	0.224347	0.722545	0.260068	0.303558	10.1517	10.2519	10.3803	10.376
LSM10	LSM10, U7 small nuclear RNA associated	84967	HGNC:17562|Ensembl:ENSG00000181817|HPRD:14326|Vega:OTTHUMG00000008140	MST074|MSTP074	NM_032881	TCCATCGGGTGCGAAACTTTGGTGGCAAGGGCCAAGGCCGGTGGGAATTT	chr1	36859030	36863493	-	N	N	N	N	II1	e0	-9.41	-8.32	1.09	-0.196462	-0.0681466	0.102456	0.054827	0.645176	0.449652	9.61412	9.41766	9.54598	9.71658
OSCP1	organic solute carrier partner 1	127700	HGNC:29971|MIM:608854|Ensembl:ENSG00000116885|HPRD:16393|Vega:OTTHUMG00000008139	C1orf102|NOR1	NM_206837	GTTGCCTTCCAGGAGTGGGGAACTATATGGAGGACAGGAGAAGGAGACTG	chr1	36893900	36916086	-	N	N	N	N	II1	e0	-4.85	-7.37	-2.52	0.214637	0.26131	-0.121479	0.256248	0.14455	0.646625	7.17637	7.39101	7.43768	7.05489
MRPS15	mitochondrial ribosomal protein S15	64960	HGNC:14504|MIM:611979|Ensembl:ENSG00000116898|HPRD:11372|Vega:OTTHUMG00000008042	MPR-S15|RPMS15|S15mt	NM_031280	CTGTATTACCGAAGAGCCCACCGCCGATTCGTGACCAAGAAGGCTCTGTG	chr1	36921361	36930040	-	N	N	N	N	II1	e0	-7.1	-8.78	-1.68	-0.18949	-0.128084	0.0412071	0.181663	0.439377	0.885436	10.6697	10.4802	10.5416	10.7109
CSF3R	colony stimulating factor 3 receptor (granulocyte)	1441	HGNC:2439|MIM:138971|Ensembl:ENSG00000119535|HPRD:00737|Vega:OTTHUMG00000008010	CD114|GCSFR	NM_000760	AAGCTCACAGTGCTGGAGGAGGATGAAAAGAAGCCGGTGCCCTGGGAGTC	chr1	36931643	36948915	-	N	N	N	N	II1	e0	-5.87	-6.66	-0.79	-0.0714816	-0.124007	-0.10418	0.617786	0.283197	0.437305	6.71761	6.64612	6.5936	6.61343
GRIK3	glutamate receptor, ionotropic, kainate 3	2899	HGNC:4581|MIM:138243|Ensembl:ENSG00000163873|HPRD:00691|Vega:OTTHUMG00000004189	EAA5|GLR7|GLUR7|GluK3|GluR7a	NM_000831	GGAGAGAGGACCCCCTGAATTTCTCACAAAGGATGCCCAAAGATGCAGCC	chr1	37261127	37499844	-	N	N	N	N	II1	e0	-4	-3.31	0.69	-0.0601487	-0.0388674	-0.00127884	0.609541	0.778398	0.994645	6.79186	6.73171	6.75299	6.79058
LINC01137	uncharacterized LOC728431	728431	Ensembl:ENSG00000233621	-	NR_038842	GTCCTTCCTGGGGTCTAATCTCTACCTTTTGCATGATGAGGCAGCTGAGG	chr1	37920479	37940044	-	N	N	N	N	II1	e0	-5.68	-7.33	-1.65	0.0194094	0.416814	0.245526	0.952659	0.0082172	0.144024	7.67144	7.69085	8.08825	7.91696
ZC3H12A	zinc finger CCCH-type containing 12A	80149	HGNC:26259|MIM:610562|Ensembl:ENSG00000163874|HPRD:08021|Vega:OTTHUMG00000004221	MCPIP|MCPIP1|RP3-423B22.1|dJ423B22.1	NM_025079	AGGCCTCATCTGTGCTCTCGCTGGGCACGTGGCTTCATGTCAGTAAGCAA	chr1	37940118	37949978	+	N	N	N	N	II1	e0	-7.48	-7.08	0.4	0.466002	0.346268	0.300946	0.00277666	0.0209774	0.049586	7.4684	7.9344	7.81467	7.76935
MEAF6	MYST/Esa1-associated factor 6	64769	HGNC:25674|MIM:611001|HPRD:13347	C1orf149|CENP-28|EAF6|NY-SAR-91	NM_022756	TGCCTCTAGTGCTGTGGTGAACTTGCGACAGGGTCTGGCTGCACATTGGA	chr1	37955560	37980420	-	N	N	N	N	II1	e0	-5.41	-8.27	-2.86	0.0701737	0.2149	0.244571	0.650244	0.04601	0.0249867	8.11003	8.18021	8.32493	8.3546
SNIP1	Smad nuclear interacting protein 1	79753	HGNC:30587|MIM:608241|Ensembl:ENSG00000163877|HPRD:06999|Vega:OTTHUMG00000004225	PMRED	NM_024700	CCCAAGGTTGGAAAGCAGGGGAATTTCCCAGTGTCCTAGTTTTCCACCAG	chr1	38000049	38019945	-	N	N	N	N	II1	e0	-5.87	-9.4	-3.53	0.228332	0.101112	0.0408951	0.131006	0.62864	0.897581	8.86655	9.09488	8.96766	8.90744
DNALI1	dynein, axonemal, light intermediate chain 1	7802	HGNC:14353|MIM:602135|Ensembl:ENSG00000163879|HPRD:03681|Vega:OTTHUMG00000004222	P28|dJ423B22.5|hp28	NM_003462	AGGTTGAGGAGGCTTTATTTCCCTAGCACTGGTGAAGGGCTTCAACTGTC	chr1	38022519	38032458	+	N	N	N	N	II1	e0	-3.55	-4.84	-1.29	0.00827811	-0.0750382	0.0534581	0.972752	0.629159	0.790427	6.82474	6.83302	6.7497	6.8782
GNL2	guanine nucleotide binding protein-like 2 (nucleolar)	29889	HGNC:29925|MIM:609365|Ensembl:ENSG00000134697|HPRD:11006|Vega:OTTHUMG00000004322	HUMAUANTIG|NGP1|Ngp-1	NM_013285	CCCAGGGCGCTTACATCAAAAGAACGGAGGCGAGCAGTACGACAGCAACG	chr1	38032412	38061586	-	N	N	N	N	II1	e1	-5.49	-5.39	0.1	0.796511	0.253619	0.0539122	2.18228e-06	0.0288384	0.804986	10.7553	11.5518	11.0089	10.8092
RSPO1	R-spondin 1	284654	HGNC:21679|MIM:609595|Ensembl:ENSG00000169218|HPRD:08288|Vega:OTTHUMG00000004321	CRISTIN3|RSPO	NM_001242910	TCTGGACTAGGTGCTAGGTTTCCAGGGAGGAGCCAAACACGGGCCTTGCT	chr1	38076950	38100595	-	N	N	N	N	II1	e0	-6.1	-3.94	2.16	-0.0593783	-0.0817003	-0.00258312	0.683741	0.531018	0.991323	6.69252	6.63314	6.61081	6.68993
C1orf109	chromosome 1 open reading frame 109	54955	HGNC:26039|MIM:614799|Ensembl:ENSG00000116922|HPRD:07918|Vega:OTTHUMG00000004323	-	NM_017850	GCCAGCCCAGAGTCAGTCCATCGGGGTTACATTTCCAAGGTCTGCTGCCT	chr1	38147241	38156192	-	N	N	N	N	II1	e1	-3.93	-5.29	-1.36	0.850117	0.397789	0.409653	2.70164e-05	0.0135078	0.0121992	8.35854	9.20866	8.75633	8.76819
CDCA8	cell division cycle associated 8	55143	HGNC:14629|MIM:609977|Ensembl:ENSG00000134690|HPRD:13017|Vega:OTTHUMG00000004320	BOR|BOREALIN|DasraB|MESRGP	NM_018101	TGTGACTTGCTTGGTGGCCTCATTCCATGTGTGCCTGTGCCTGGGGCATG	chr1	38158072	38175391	+	N	N	N	N	II1	e2	-6.12	-4.19	1.93	-0.431876	-0.593061	-0.322066	0.00968282	0.000975324	0.0599019	9.9307	9.49883	9.33764	9.60864
EPHA10	EPH receptor A10	284656	HGNC:19987|MIM:611123|Ensembl:ENSG00000183317|HPRD:08163|Vega:OTTHUMG00000004325	-	NM_001099439	AGAAGGGCCCCTGGCTGTGTTGGCAGGACTTCGGTGTCCAGGGTAGATCT	chr1	38181645	38230824	-	N	N	N	N	II1	e0	-6.58	-6.06	0.52	-0.143058	-0.175428	-0.104263	0.124733	0.0539667	0.35043	6.93821	6.79515	6.76278	6.83395
MANEAL	mannosidase, endo-alpha-like	149175	HGNC:26452|Ensembl:ENSG00000185090|HPRD:08713|Vega:OTTHUMG00000004317	RP11-109P14.3	NM_001113482	TTTAGCTCTAGGGAGAGGACTAGGAGGAAATCCCCCTCCCTTTAGCTGCC	chr1	38259773	38267278	+	N	N	N	N	II1	e0	-6.67	-6.27	0.4	0.117387	0.28097	0.317669	0.389518	0.014682	0.00719777	7.12297	7.24036	7.40394	7.44064
YRDC	yrdC N(6)-threonylcarbamoyltransferase domain containing	79693	HGNC:28905|MIM:612276|Ensembl:ENSG00000196449|HPRD:18313|Vega:OTTHUMG00000004318	DRIP3|IRIP|RP11-109P14.4|SUA5	NM_024640	GGTGTAATAGTGGGATGTCTGCTTAGTTGGCAGGGGTTCAGTCCAAATGG	chr1	38268613	38273865	-	N	N	N	N	II1	e1	-9.61	-8.83	0.78	0.534636	0.0956438	0.0704963	0.000854437	0.656492	0.797988	10.9255	11.4601	11.0211	10.996
C1orf122	chromosome 1 open reading frame 122	127687	HGNC:24789|Ensembl:ENSG00000197982|HPRD:13508|Vega:OTTHUMG00000004319	ALAESM	NM_001142726	AGCCCTGACCATCCCCGAGCAGAATACCCTGACTTCTCTCCCTCCCCAGG	chr1	38273472	38275126	+	N	N	N	N	II1	e0	-7.47	-7.03	0.44	0.152989	0.122676	0.10099	0.4466	0.583881	0.70785	8.31025	8.46324	8.43292	8.41124
MTF1	metal-regulatory transcription factor 1	4520	HGNC:7428|MIM:600172|Ensembl:ENSG00000188786|HPRD:02546|Vega:OTTHUMG00000004439	MTF-1|ZRF	NM_005955	GATCACTGTCCTTGCCTTCCTGGTTCTTTCTCTCGGTTGGTTGCCAGGGC	chr1	38275238	38325292	-	N	N	N	N	II1	e0	-6.08	-5.23	0.85	0.0940101	-0.0907654	-0.118826	0.847148	0.849034	0.818783	8.11983	8.21384	8.02907	8.00101
INPP5B	inositol polyphosphate-5-phosphatase, 75kDa	3633	HGNC:6077|MIM:147264|Ensembl:ENSG00000204084|HPRD:00924|Vega:OTTHUMG00000004436	5PTase	NM_005540	GCAAACTCGACCCCCGTTCCTGCCCAGATAATGGCTCAATAACTCTGAGG	chr1	38326368	38412729	-	N	N	N	N	II1	e0	-5.95	-5.41	0.54	-0.298719	-0.335493	-0.0866682	0.0973428	0.0605842	0.792212	7.57952	7.2808	7.24402	7.49285
SF3A3	splicing factor 3a, subunit 3, 60kDa	10946	HGNC:10767|MIM:605596|Ensembl:ENSG00000183431|HPRD:10411|Vega:OTTHUMG00000004438	PRP9|PRPF9|SAP61|SF3a60	NM_006802	ACAGGATCCCCCAGAGACCCCATTTGCCTCTCAACACTCAGACCTTCAAC	chr1	38422651	38455761	-	N	N	N	N	II1	e0	-4.74	-3.27	1.47	0.0856317	0.152156	0.00815471	0.82214	0.625395	0.98828	10.9066	10.9922	11.0588	10.9148
FHL3	four and a half LIM domains 3	2275	HGNC:3704|MIM:602790|Ensembl:ENSG00000183386|HPRD:09101|Vega:OTTHUMG00000004434	SLIM2	NM_001243878	AGGTCTCCTATGGGTGCCTGGGAAGTCCTTGAAAGTGGACTGTTCTCAGG	chr1	38462441	38471187	-	N	N	N	N	II1	e0	-7.55	-4.77	2.78	0.203723	0.469461	0.46974	0.273312	0.00588155	0.00653096	7.45463	7.65835	7.92409	7.92437
UTP11L	UTP11-like, U3 small nucleolar ribonucleoprotein, (yeast)	51118	HGNC:24329|MIM:609440|Ensembl:ENSG00000183520|HPRD:16711|Vega:OTTHUMG00000004435	CGI94	NM_016037	CCCGGAGCTAGTCGACAGAGTCTTTAATAGGCCCAGGATAGAGACCTTGC	chr1	38478383	38490497	+	N	N	N	N	II1	e0	-4.42	-8.21	-3.79	0.0628394	-0.23061	-0.163728	0.867831	0.320992	0.577799	10.4269	10.4898	10.1963	10.2632
POU3F1	POU class 3 homeobox 1	5453	HGNC:9214|MIM:602479|Ensembl:ENSG00000185668|HPRD:03921|Vega:OTTHUMG00000000485	OCT6|OTF6|SCIP	NM_002699	AACCAGCTGTAGAAATAAGCCGTTCCCTGAGAACCCTCCGCCTGATTCCC	chr1	38509522	38512450	-	N	N	N	N	II1	e0	-5.48	-3.95	1.53	0.0264784	-0.0604829	-0.068179	0.893478	0.68825	0.67225	6.76305	6.78952	6.70256	6.69487
RRAGC	Ras-related GTP binding C	64121	HGNC:19902|MIM:608267|Ensembl:ENSG00000116954|HPRD:12198|Vega:OTTHUMG00000000490	GTR2|RAGC|TIB929	NM_022157	ACGAAACGCCATCTAGTCTGAATCCCAGCGTCGGGGCTCTGTGCCAGCTT	chr1	39303868	39325495	-	N	N	N	N	II1	e0	-6.04	-5.39	0.65	0.0726067	0.1135	0.0862074	0.67644	0.436405	0.632309	8.60896	8.68157	8.72246	8.69517
MYCBP	MYC binding protein	26292	HGNC:7554|MIM:606535|HPRD:08406|Vega:OTTHUMG00000000484	AMY-1	NM_012333	TCAGCCCTGTTAGTAGGAATGTGGCTATGGCTGGTGCCTCTTCTAGTCAC	chr1	39328161	39339050	-	N	N	N	N	II1	e0	-7.09	-6.78	0.31	-0.189947	0.0404293	0.00703539	0.158523	0.861512	0.982874	7.20885	7.0189	7.24928	7.21589
GJA9	gap junction protein, alpha 9, 59kDa	81025	HGNC:19155|MIM:611923|Ensembl:ENSG00000131233|HPRD:13578	CX58|CX59|GJA10	NM_030772	TCCACCTTGGACACTGGGTTAATTCTGTTTGCCCCTGGAACACAATCACG	chr1	39339738	39347298	-	N	N	N	N	II1	e0	-6.28	-6.85	-0.57	-0.0203362	0.0396661	-0.0781665	0.901569	0.765366	0.487304	6.67231	6.65198	6.71198	6.59415
RHBDL2	rhomboid, veinlet-like 2 (Drosophila)	54933	HGNC:16083|MIM:608962|Ensembl:ENSG00000158315|HPRD:07151	RRP2	NM_017821	AAGAAGGGTAGTAAAAACTAGAGATTGGGGCCAGGCGCAGTGGCTCACGC	chr1	39351478	39407456	-	N	N	N	N	II1	e0	-3.7	-3.62	0.08	0.042302	-0.117533	-0.13727	0.838109	0.403051	0.332458	7.19491	7.23722	7.07738	7.05764
AKIRIN1	akirin 1	79647	HGNC:25744|MIM:615164|Ensembl:ENSG00000174574|HPRD:07787|Vega:OTTHUMG00000007496	C1orf108|RP11-781D11.2|STRF2	NM_001136275	CAGGCCCCGGCAGCACTGCTACTTGGGAGGAGCCACTTCACCTTTGTATT	chr1	39456915	39471737	+	N	N	N	N	II1	e0	-6.09	-7.09	-1	0.181428	0.27544	0.245157	0.358048	0.115148	0.193911	8.72311	8.90454	8.99855	8.96827
NDUFS5	NADH dehydrogenase (ubiquinone) Fe-S protein 5, 15kDa (NADH-coenzyme Q reductase)	4725	HGNC:7712|MIM:603847|Ensembl:ENSG00000168653|HPRD:11961|Vega:OTTHUMG00000007497	CI-15k|CI15K	NM_001184979	CAATCCAGAGTGGTGAACAGCCCTACAAGATGGCTGGTCGATGCCATGCT	chr1	39491966	39500308	+	N	N	N	N	II1	e0	-5.9	-6.76	-0.86	0.00492658	0.164461	0.20762	0.981008	0.107498	0.0401562	12.2594	12.2644	12.4239	12.4671
MACF1	microtubule-actin crosslinking factor 1	23499	HGNC:13664|MIM:608271|Ensembl:ENSG00000127603|HPRD:09750|Vega:OTTHUMG00000007754	ABP620|ACF7|MACF|OFC4	NM_012090	CAGCCTAGACACCAGTAACTCTTGTGTTCACCAGGACCCAGACCCTTGGC	chr1	39549838	39952810	+	N	N	N	N	II1	e1	-5.58	-5.33	0.25	0.164637	0.604837	0.756281	0.505996	0.00266052	0.000481276	9.64677	9.81141	10.2516	10.4031
KIAA0754	KIAA0754	643314	HGNC:29111|Ensembl:ENSG00000255103|Vega:OTTHUMG00000166964	-	NM_015038	TTGAATCTAGAGCACCAGAAGGTAAGAAGCTGGATGAGAGGATAATATTT	chr1	39875175	39882154	+	N	N	N	N	II1	e0	-4.05	-5.83	-1.78	-0.0940815	-0.0854559	-0.0651437	0.525839	0.587795	0.73903	6.78325	6.68916	6.69779	6.7181
BMP8A	bone morphogenetic protein 8a	353500	HGNC:21650|HPRD:16555	-	NM_181809	CACCTGATGAAGCCAAACGCAGTCCCCAAGGCGTGCTGTGCACCCACCAA	chr1	39957317	39995541	+	N	N	N	N	II1	e0	-7.55	-5.77	1.78	0.0446372	-0.0246703	0.0171788	0.782375	0.892768	0.939681	6.72728	6.77192	6.70261	6.74446
PPIEL	peptidylprolyl isomerase E-like pseudogene	728448	HGNC:33195	PPIEP1	NR_003929	TCAAAAGGGCAGGACCAGCACCCTCTTCTACGGAGGAAGGAACGGGCACA	chr1	39987951	40025370	-	N	N	N	N	II1	e0	-5.92	-4.96	0.96	0.181507	0.167735	0.0949371	0.302809	0.360097	0.714813	7.34066	7.52217	7.5084	7.4356
PABPC4	poly(A) binding protein, cytoplasmic 4 (inducible form)	8761	HGNC:8557|MIM:603407|Ensembl:ENSG00000090621|HPRD:04557|Vega:OTTHUMG00000009097	APP-1|APP1|PABP4|iPABP	NM_001135654	CTGCTGCACATGTTAGAGTCCCCCGAGTCTCTCCGCTCCAAGGTGGATGA	chr1	40026484	40042521	-	N	N	N	N	II1	e0	-6.95	-8.18	-1.23	0.125084	0.178466	0.3103	0.632588	0.433147	0.113482	11.6426	11.7677	11.8211	11.9529
SNORA55	small nucleolar RNA, H/ACA box 55	677834	HGNC:32649	ACA55	NR_002983	TTTCCCATTCCTTGCTGCCTCGTGCCGGTGTGGGGACAGATGGTGCTACA	chr1	40033045	40033182	-	N	N	N	N	II1	e0	-5.33	-9.14	-3.81	0.0453326	-0.0178317	0.0550137	0.749634	0.917933	0.7103	6.86464	6.90998	6.84681	6.91966
HEYL	hairy/enhancer-of-split related with YRPW motif-like	26508	HGNC:4882|MIM:609034|Ensembl:ENSG00000163909|HPRD:16419|Vega:OTTHUMG00000000458	HESR3|HEY3|HRT3|bHLHb33	NM_014571	GTGTTTCTATCCCCAAGCCTTCCTGGTGTCTCCAACTCCTACCCCATTGC	chr1	40089102	40105348	-	N	N	N	N	II1	e0	-8.12	-7.07	1.05	-0.0714366	-0.243357	-0.183306	0.643307	0.0239578	0.10743	7.6722	7.60077	7.42885	7.4889
NT5C1A	5'-nucleotidase, cytosolic IA	84618	HGNC:17819|MIM:610525|Ensembl:ENSG00000116981|HPRD:14844|Vega:OTTHUMG00000009244	CN-I|CN-IA|CN1|CN1A|CNI	NM_032526	CATGTGCCTTATGGTGTGGCACAGACACCCCGGCGGACTGCACCTGCAAA	chr1	40124792	40137710	-	N	N	N	N	II1	e0	-7.72	-5.12	2.6	-0.000783565	-0.0551403	-0.0853992	0.99697	0.785841	0.661277	6.82979	6.82901	6.77465	6.74439
HPCAL4	hippocalcin like 4	51440	HGNC:18212|Ensembl:ENSG00000116983|HPRD:17113|Vega:OTTHUMG00000009246	HLP4	NM_001282396	CCCTGGGTGAGGCTTTGAGCTGACTTTAGAGATCACTGTGGGGTCAAGAA	chr1	40144319	40157157	-	N	N	N	N	II1	e0	-9.35	-5.31	4.04	0.229141	0.209816	0.138221	0.0388138	0.0625748	0.298842	6.82398	7.05312	7.03379	6.9622
PPIE	peptidylprolyl isomerase E (cyclophilin E)	10450	HGNC:9258|MIM:602435|Ensembl:ENSG00000084072|HPRD:03893|Vega:OTTHUMG00000009248	CYP-33|CYP33	NM_001195007	AGCATACGGGACCAGGTCTACTATCCATGGCCAACTCTGGCCCAAACACC	chr1	40204516	40229586	+	N	N	N	N	II1	e0	-5.95	-5.79	0.16	-0.358915	-0.15492	-0.182007	0.0120469	0.356951	0.280065	9.18805	8.82913	9.03313	9.00604
BMP8B	bone morphogenetic protein 8b	656	HGNC:1075|MIM:602284|HPRD:03792	BMP8|OP2	NM_001720	TGCAGTGAGCAGAGATCACAACATTGCACTTCAGCCTGGTGACATGAGCA	chr1	40223902	40254533	-	N	N	N	N	II1	e0	-7.64	-6.13	1.51	-0.00372017	0.0243658	-0.0648623	0.990316	0.936675	0.821074	6.72854	6.72482	6.75291	6.66368
OXCT2	3-oxoacid CoA transferase 2	64064	HGNC:18606|MIM:610289|Ensembl:ENSG00000198754|HPRD:15093|Vega:OTTHUMG00000009249	SCOTT	NM_022120	CTCCTACTTTCCTCCCTAGGTGGACAGTGCTCCTCTAGAGAGCTGCGACT	chr1	40235196	40237020	-	N	N	N	N	II1	e0	-11.29	-10.17	1.12	-0.00879017	-0.00543626	-0.121321	0.973135	0.982354	0.42003	6.99458	6.98579	6.98914	6.87326
TRIT1	tRNA isopentenyltransferase 1	54802	HGNC:20286|Ensembl:ENSG00000043514|HPRD:18226|Vega:OTTHUMG00000009245	IPT|MOD5	NM_017646	GTGAGCCACATATTGGGAGTTCTAGATTTGAGTGAATGGCAGGAAAGGGC	chr1	40306705	40349177	-	N	N	N	N	II1	e0	-6.09	-6.32	-0.23	0.251361	-0.0950744	-0.0909823	0.0395844	0.571317	0.626933	9.62474	9.8761	9.52966	9.53376
MYCL	v-myc avian myelocytomatosis viral oncogene lung carcinoma derived homolog	4610	HGNC:7555|MIM:164850|Ensembl:ENSG00000116990|HPRD:01279|Vega:OTTHUMG00000009243	LMYC|MYCL1|bHLHe38	NM_005376	AAGTGTCCTTCTTGCTCCCCCTCAATAGATCTCCAGCGTCAGCTGCTCCC	chr1	40365283	40367687	-	N	N	N	N	II1	e0	-7.92	-5.92	2	-0.0969256	-0.0850015	-0.108763	0.531234	0.609871	0.503884	6.86918	6.77226	6.78418	6.76042
MFSD2A	major facilitator superfamily domain containing 2A	84879	HGNC:25897|MIM:614397|Ensembl:ENSG00000168389|HPRD:07861|Vega:OTTHUMG00000009293	MFSD2	NM_001136493	GCAGCTCTGGCTGCTCAGAAACAGACTCCACAGAGCTGGCTAGCATCCTC	chr1	40420783	40435640	+	N	N	N	N	II1	e0	-8.83	-7.09	1.74	0.196037	0.0712833	0.0991764	0.0682411	0.645284	0.498881	6.90871	7.10474	6.97999	7.00788
CAP1	CAP, adenylate cyclase-associated protein 1 (yeast)	10487	HGNC:20040|Ensembl:ENSG00000131236|HPRD:09869|Vega:OTTHUMG00000004493	CAP|CAP1-PEN	NM_006367	GTGCCTGTCACCTGTCTTCACTGCCTCCTTTTCCCTGTCATGCTCATCAG	chr1	40506254	40538321	+	N	N	N	N	II1	e0	-6.46	-7.34	-0.88	-0.130536	0.217329	0.282045	0.489515	0.166412	0.0658536	11.8033	11.6728	12.0207	12.0854
PPT1	palmitoyl-protein thioesterase 1	5538	HGNC:9325|MIM:600722|Ensembl:ENSG00000131238|HPRD:07203|Vega:OTTHUMG00000004495	CLN1|INCL|PPT	NM_000310	TTGGAGAAATGATGAGCTACGCCTTGATGAAAGAACCGTGTTGGTGCTGC	chr1	40538381	40563142	-	N	N	N	N	II1	e0	-6.24	-7.26	-1.02	0.0729195	-0.153305	0.00115175	0.796715	0.471379	0.99706	10.9542	11.0271	10.8009	10.9553
RLF	rearranged L-myc fusion	6018	HGNC:10025|MIM:180610|Ensembl:ENSG00000117000|HPRD:01614|Vega:OTTHUMG00000005763	ZN-15L|ZNF292L	NM_012421	TGGGGACATTTGCCAACTCGAACAAAGGCTGAGAAGCAGCCACACCGTTG	chr1	40627040	40706593	+	N	N	N	N	II1	e0	-5.01	-5.55	-0.54	0.0503043	0.156454	0.0882755	0.816885	0.262957	0.651309	7.38925	7.43955	7.5457	7.47752
TMCO2	transmembrane and coiled-coil domains 2	127391	HGNC:23312|Ensembl:ENSG00000188800|HPRD:18369|Vega:OTTHUMG00000005764	dJ39G22.2	NM_001008740	GCTCAAAAACCTGCCACGAAGAGGGATTGCTCCTCTGAGCCCTACTGCAG	chr1	40713572	40717365	+	N	N	N	N	II1	e0	-3.82	-4.2	-0.38	0.0480921	0.0608184	0.0174253	0.792333	0.715115	0.945617	6.72048	6.76858	6.7813	6.73791
ZMPSTE24	zinc metallopeptidase STE24	10269	HGNC:12877|MIM:606480|Ensembl:ENSG00000084073|HPRD:07349|Vega:OTTHUMG00000005762	FACE-1|FACE1|HGPS|PRO1|STE24|Ste24p	NM_005857	GGGATCAACTGTACGCCTTTGGTATCTGACCATAAAGTCTTTTGCTCCGC	chr1	40723721	40759856	+	N	N	N	N	II1	e1	-4.5	-5.13	-0.63	0.774367	0.601843	0.427103	7.47122e-06	8.45401e-05	0.00176945	9.72127	10.4956	10.3231	10.1484
COL9A2	collagen, type IX, alpha 2	1298	HGNC:2218|MIM:120260|Ensembl:ENSG00000049089|HPRD:00373|Vega:OTTHUMG00000005761	DJ39G22.4|EDM2|MED|STL5	NM_001852	GCCAGTTCCTGATCCCATCTCACTCTCTGGACCTACCAGGTGACTGCTGC	chr1	40766162	40782939	-	N	N	N	N	II1	e0	-8.11	-7.22	0.89	-0.219105	-0.421224	-0.270176	0.0965764	0.00206458	0.0412908	7.17436	6.95526	6.75314	6.90419
SMAP2	small ArfGAP2	64744	HGNC:25082|Ensembl:ENSG00000084070|HPRD:12442|Vega:OTTHUMG00000007301	RP1-228H13.3|SMAP1L	NM_001198979	GGATCTGGGGCTTCAGGACTTGCTGCTTCAGTCAGCTTTTATTAGCACCA	chr1	40859016	40888998	+	N	N	N	N	II1	e2	-5.22	-5.35	-0.13	-0.700542	-0.43897	-0.364491	0.00243851	0.0481139	0.122703	8.78033	8.07978	8.34136	8.41584
ZFP69B	ZFP69 zinc finger protein B	65243	HGNC:28053|Ensembl:ENSG00000187801|HPRD:15884|Vega:OTTHUMG00000007302	RP11-656D10.1|ZKSCAN23B|ZNF643|ZSCAN54B	NM_023070	GTTGGAGCACAAGATTCTAAATCAGTGGTTCCCTGATCCCTCAAAAATCC	chr1	40916336	40929390	+	N	N	N	N	II1	e0	-2.41	-5.46	-3.05	-0.049966	-0.161353	-0.133289	0.742044	0.102218	0.22123	7.29387	7.2439	7.13252	7.16058
ZFP69	ZFP69 zinc finger protein	339559	HGNC:24708|Ensembl:ENSG00000187815|HPRD:15883|Vega:OTTHUMG00000007303	RP11-656D10.2|ZFP69A|ZKSCAN23A|ZNF642|ZSCAN54A	NM_198494	CTCTTCACTTAGTCGACATCATGAAATACACAGGAGGAACGCCTTCCGAA	chr1	40943301	40962015	+	N	N	N	N	II1	e0	-3.1	-2.75	0.35	-0.00312187	-0.0254586	0.0207566	0.987421	0.883631	0.921109	6.93295	6.92983	6.9075	6.95371
EXO5	exonuclease 5	64789	HGNC:26115|Ensembl:ENSG00000164002|HPRD:07955|Vega:OTTHUMG00000007305	C1orf176|DEM1|Exo V|hExo5	NM_022774	CCAGGACCAAGGCTCAGGGATGAGTGGGAGAGATGGGTTATACTGTCCCT	chr1	40974432	40982214	+	N	N	N	N	II1	e0	-5.91	-5.34	0.57	-0.160372	-0.198274	0.091475	0.406635	0.268759	0.740059	7.85601	7.69564	7.65774	7.94749
ZNF684	zinc finger protein 684	127396	HGNC:28418|Ensembl:ENSG00000117010|HPRD:11328|Vega:OTTHUMG00000007359	-	NM_152373	CCATTTGCTGGCACTTTTAATGGGCATGACAGTGTTTCTGAATCTGAGTC	chr1	40997232	41013841	+	N	N	N	N	II1	e0	-5.38	-3.73	1.65	0.0792514	0.00119837	0.104643	0.624085	0.995208	0.510379	7.29509	7.37434	7.29629	7.39974
RIMS3	regulating synaptic membrane exocytosis 3	9783	HGNC:21292|MIM:611600|Ensembl:ENSG00000117016|HPRD:17976|Vega:OTTHUMG00000007453	NIM3|RIM3	NM_014747	GTGCAGCATCTTTCCTAACTTGTTGTGGTTCCCGGGTGGCAGGTGCACAG	chr1	41086351	41131324	-	N	N	N	N	II1	e2	-7.82	-7.9	-0.08	-1.39598	-0.706145	-0.569915	1.86097e-07	0.00015175	0.00104978	9.85888	8.4629	9.15273	9.28896
NFYC-AS1	uncharacterized LOC100130557	100130557	-	-	NR_024567	GACACAAGAGCAGCATGTCCTAAATAGAGCTCCCTCTTCAGCTTTGGTCC	chr1	41154751	41157933	-	N	N	N	N	II1	e0	-7.41	-10.02	-2.61	0.0462491	-0.063302	-0.0754888	0.828331	0.740137	0.708548	7.54594	7.59219	7.48264	7.47045
NFYC	nuclear transcription factor Y, gamma	4802	HGNC:7806|MIM:605344|Ensembl:ENSG00000066136|Vega:OTTHUMG00000007729	CBF-C|CBFC|H1TF2A|HAP5|HSM|NF-YC	NM_001142587	GGAACAGCTGCTACCCCCAAGACTTGCCACGTTGTTCTGCCCTCAGATGG	chr1	41157241	41237275	+	N	N	N	N	II1	e0	-6.17	-5.33	0.84	-0.140286	-0.226014	-0.213402	0.508093	0.204586	0.268298	9.48307	9.34278	9.25705	9.26966
MIR30E	microRNA 30e	407034	HGNC:31629|miRBase:MI0000749	MIRN30E	NR_029846	AAGCTGTAAGGTGTTCAGAGGAGCTTTCAGTCGGATGTTTACAGCGGCAG	chr1	41220026	41220118	+	N	N	N	N	II1	e0	-5.5	-5.05	0.45	0.0470217	0.0903264	0.00881796	0.73604	0.399227	0.967551	6.67862	6.72564	6.76895	6.68744
MIR30C1	microRNA 30c-1	407031	HGNC:31626|MIM:615151|miRBase:MI0000736	MIRN30C1	NR_029833	GTAGTGTGTGTAAACATCCTACACTCTCAGCTGTGAGCTCAAGGTGGCTG	chr1	41222955	41223044	+	N	N	N	N	II1	e0	-9.41	-7.34	2.07	0.0849479	-0.0450113	-0.0329932	0.630884	0.835126	0.904752	6.75237	6.83732	6.70736	6.71938
KCNQ4	potassium voltage-gated channel, KQT-like subfamily, member 4	9132	HGNC:6298|MIM:603537|Ensembl:ENSG00000117013|HPRD:04641|Vega:OTTHUMG00000007730	DFNA2|DFNA2A|KV7.4	NM_004700	CGCGTGGTCAAGGTGGAGAAGCAGGTGCAGTCCATCGAGCACAAGCTGGA	chr1	41249683	41306124	+	N	N	N	N	II1	e0	-7.3	-5.86	1.44	-0.156295	-0.0725585	-0.0554362	0.183327	0.652311	0.78592	6.87973	6.72344	6.80718	6.8243
CITED4	Cbp/p300-interacting transactivator, with Glu/Asp-rich carboxy-terminal domain, 4	163732	HGNC:18696|MIM:606815|Ensembl:ENSG00000179862|HPRD:06011|Vega:OTTHUMG00000007728	-	NM_133467	GCTTCAGCTTTCGGACTCTGGTTCTTGGATCGTGTCCTCTCCCCCTCGCC	chr1	41326727	41328018	-	N	N	N	N	II1	e0	-7.14	-5.88	1.26	-0.203622	-0.221717	-0.238596	0.166011	0.127055	0.107004	6.95352	6.7499	6.7318	6.71492
CTPS1	CTP synthase 1	1503	HGNC:2519|MIM:123860|Ensembl:ENSG00000171793|HPRD:00465|Vega:OTTHUMG00000005712	CTPS	NM_001905	TCCCCATGCCTGTGCGTGCGCTTCCTATTTCTAGGGCTGGGAAACACTCC	chr1	41445006	41478235	+	N	N	N	N	II1	e0	-7.95	-5.24	2.71	0.117134	-0.204288	-0.0487717	0.394627	0.0808167	0.827538	10.3348	10.4519	10.1305	10.286
SLFNL1	schlafen-like 1	200172	HGNC:26313|Ensembl:ENSG00000171790|HPRD:08044|Vega:OTTHUMG00000005719	-	NM_001168247	TGGCGAGGCATATTTGATGACTGTGGTTACAGGGCAAGAGGCCACCCTGC	chr1	41481268	41487397	-	N	N	N	N	II1	e0	-9.28	-7.92	1.36	0.0297374	-0.013886	-0.0269284	0.893377	0.953491	0.915057	6.65909	6.68883	6.6452	6.63216
SCMH1	sex comb on midleg homolog 1 (Drosophila)	22955	HGNC:19003|Ensembl:ENSG00000010803|HPRD:11540|Vega:OTTHUMG00000005720	Scml3	NM_001172220	TTAGGCTGAATGCCTTCCACGTGATGGAGGAAAAGGCCAACTCTGTCCTG	chr1	41492870	41707815	-	Y	Y	Y	Y	AMB1	e2	-2.44	-3.17	-0.73	-0.308157	-0.51385	-0.292129	0.0117336	0.00024476	0.0190041	7.78993	7.48177	7.27608	7.4978
EDN2	endothelin 2	1907	HGNC:3177|MIM:131241|Ensembl:ENSG00000127129|HPRD:07173|Vega:OTTHUMG00000006362	ET2|PPET2	NM_001956	TACAAACCAGGAGCAACCGTGCAGCCACGAACACGCATGCCTCAGCCAGC	chr1	41944445	41950344	-	N	N	N	N	II1	e0	-6.12	-5.49	0.63	0.0141988	-0.00811315	-0.0400878	0.941865	0.96854	0.829777	6.86749	6.88169	6.85938	6.8274
HIVEP3	human immunodeficiency virus type I enhancer binding protein 3	59269	HGNC:13561|MIM:606649|Ensembl:ENSG00000127124|HPRD:09442|Vega:OTTHUMG00000006361	KBP-1|KBP1|KRC|SHN3|Schnurri-3|ZAS3|ZNF40C	NR_038261	TATGGTTTTGGGGAAAGGCTGATGGTGAAGCCTCCTGACCCTCCCCGCTG	chr1	42312859	42501596	-	N	N	N	N	II1	e1	-4.9	-4.28	0.62	0.589994	0.529481	0.354467	4.2681e-05	0.000119599	0.0037157	6.95304	7.54303	7.48252	7.30751
GUCA2B	guanylate cyclase activator 2B (uroguanylin)	2981	HGNC:4683|MIM:601271|Ensembl:ENSG00000044012|HPRD:03170|Vega:OTTHUMG00000007024	GCAP-II|UGN	NM_007102	CCCTGAGGACCATCGCTAACGACGACTGTGAGCTGTGTGTGAACGTTGCG	chr1	42619091	42621495	+	N	N	N	N	II1	e0	-6.08	-5.75	0.33	-0.00844517	-0.0986636	-0.0460198	0.970007	0.422675	0.809203	6.85629	6.84785	6.75763	6.81027
GUCA2A	guanylate cyclase activator 2A (guanylin)	2980	HGNC:4682|MIM:139392|Ensembl:ENSG00000197273|HPRD:00767|Vega:OTTHUMG00000007023	GCAP-I|GUCA2|STARA	NM_033553	GCCTCGCCCCAACACTGTCCTTCCCTGCCACTTCAACCCCCAGCTAATAA	chr1	42628361	42630395	-	N	N	N	N	II1	e0	-6.4	-3.65	2.75	0.00139426	-0.109601	-0.0547351	0.994464	0.386348	0.774325	6.88392	6.88531	6.77432	6.82918
FOXJ3	forkhead box J3	22887	HGNC:29178|Ensembl:ENSG00000198815|HPRD:13549|Vega:OTTHUMG00000007026	-	NM_001198852	GCATTGGCTTTTTGTGCAGATACAACCTGCTCTCTGTACTGCTGTTGGAC	chr1	42642209	42800886	-	N	N	N	N	II1	e0	-4.4	-4.73	-0.33	-0.184068	-0.25165	-0.0854156	0.443078	0.2392	0.819019	9.71474	9.53068	9.46309	9.62933
RIMKLA	ribosomal modification protein rimK-like family member A	284716	HGNC:28725|Ensembl:ENSG00000177181|HPRD:14656|Vega:OTTHUMG00000007335	FAM80A|NAAGS|NAAGS-II	NM_173642	GGCCCCACCCTCCATGCTGCCCGAACCTGGCTACAACATTAACAACAGGA	chr1	42846467	42889900	+	N	N	N	N	II1	e0	-5.01	-4.76	0.25	-0.24848	-0.0114104	-0.148367	0.0102903	0.955291	0.160635	7.65296	7.40448	7.64155	7.50459
ZMYND12	zinc finger, MYND-type containing 12	84217	HGNC:21192|Ensembl:ENSG00000066185|HPRD:15740|Vega:OTTHUMG00000007333	-	NM_001146192	CTGCTTTGAGGTACTGTAGACTGCTGAAGTTTCCACCCTCTTCCCCTGGG	chr1	42896000	42921938	-	N	N	N	N	II1	e0	-4.33	-3.53	0.8	-0.045632	-0.075927	-0.0606254	0.771008	0.559353	0.701103	6.85981	6.81418	6.78389	6.79919
PPCS	phosphopantothenoylcysteine synthetase	79717	HGNC:25686|MIM:609853|Ensembl:ENSG00000127125|HPRD:07760|Vega:OTTHUMG00000007332	-	NM_001287506	AGAAAGGGAAAAGGCAGTGGTGTGTAGGCAAATATGGTTTGGCATTTGTC	chr1	42922011	42926901	+	N	N	N	N	II1	e0	-10.5	-8.62	1.88	-0.245876	-0.134533	-0.175375	0.219067	0.602499	0.482807	8.73936	8.49349	8.60483	8.56399
CCDC30	coiled-coil domain containing 30	728621	HGNC:26103|Ensembl:ENSG00000186409|HPRD:08632|Vega:OTTHUMG00000007334	PFD6L|PFDN6L	NM_001080850	CACCATCTCCAGAGTCGTTGGTGGCTACCCATGCTAAGTCATTAGTCCTC	chr1	43000559	43120335	+	N	N	N	N	II1	e0	-2.85	-2.77	0.08	0.0792048	0.0283132	-0.0439575	0.60102	0.889803	0.839009	6.66206	6.74126	6.69037	6.6181
PPIH	peptidylprolyl isomerase H (cyclophilin H)	10465	HGNC:14651|MIM:606095|Ensembl:ENSG00000171960|HPRD:12084|Vega:OTTHUMG00000007520	CYP-20|CYPH|SnuCyp-20|USA-CYP	NM_006347	GCTACCTGTGGTGATCTCGCAGTGTGGGGAGATGTAGTCCAGACAAAGAC	chr1	43124047	43142429	+	N	N	N	N	II1	e0	-5.54	-4.55	0.99	-0.079676	-0.240473	-0.295242	0.697495	0.0840326	0.0338887	10.665	10.5853	10.4245	10.3697
YBX1	Y box binding protein 1	4904	HGNC:8014|MIM:154030|Ensembl:ENSG00000065978|HPRD:01095|Vega:OTTHUMG00000007523	BP-8|CSDA2|CSDB|DBPB|MDR-NF1|NSEP-1|NSEP1|YB-1|YB1	NM_004559	AGATGGCAAAGAGACAAAAGCAGCCGATCCACCAGCTGAGAATTCGTCCG	chr1	43148065	43168020	+	N	N	N	N	II1	e0	-8	-5.19	2.81	-0.0999035	-0.177192	-0.153744	0.725281	0.433051	0.558389	12.8363	12.7364	12.6592	12.6826
CLDN19	claudin 19	149461	HGNC:2040|MIM:610036|Ensembl:ENSG00000164007|HPRD:10834|Vega:OTTHUMG00000007524	HOMG5	NM_001185117	GCATCAGAAGTCATGTAGCTCCTCAGGGGACTGTAGTGTGTGGTCAGCAC	chr1	43198763	43205925	-	N	N	N	N	II1	e0	-7.03	-8.4	-1.37	0.0458321	0.0261398	0.150669	0.803316	0.898449	0.218621	6.85472	6.90055	6.88086	7.00539
LEPRE1	leucine proline-enriched proteoglycan (leprecan) 1	64175	HGNC:19316|MIM:610339|Ensembl:ENSG00000117385|HPRD:11227|Vega:OTTHUMG00000007525	GROS1|OI8|P3H1	NM_022356	TACATCTGCCACTCAGCCGAGGGGACCCTGCTCACAGCCTTCTACATGGT	chr1	43212005	43232755	-	N	N	N	N	II1	e1	-7.32	-5.74	1.58	0.106986	0.545377	0.401227	0.668956	0.00229815	0.0208505	8.15242	8.25941	8.6978	8.55365
C1orf50	chromosome 1 open reading frame 50	79078	HGNC:28795|Ensembl:ENSG00000164008|HPRD:14714|Vega:OTTHUMG00000007568	-	NM_024097	GGACCTGGCTGTCAACCTCCTTGTTGCCCCCACTGTTGCCTTGAGAATTG	chr1	43232915	43241413	+	N	N	N	N	II1	e1	-8.88	-6.92	1.96	0.235986	0.536575	0.390529	0.10805	0.000662194	0.0082877	9.23143	9.46742	9.76801	9.62196
LOC100129924	uncharacterized LOC100129924	100129924	-	-	NM_001242750	CGGATGCTCCTGGTCAGCTTCCTGTTAGACATGGCAGTCAGGGCAATGAC	chr1	43253660	43263901	+	N	N	N	N	II1	e0	-4.48	-7.54	-3.06	0.106856	-0.0198736	0.0180019	0.442325	0.93047	0.945771	6.73864	6.84549	6.71876	6.75664
CCDC23	coiled-coil domain containing 23	374969	HGNC:29204|Ensembl:ENSG00000177868|HPRD:14191|Vega:OTTHUMG00000007566	-	NM_199342	CCCCAGGTTCAAACCAGATGGGATCCTGAGAGCTTTGAGAGGGTGTTGCC	chr1	43272722	43283059	-	N	N	N	N	II1	e2	-5.04	-7.22	-2.18	-0.503641	-0.781784	-0.798206	0.000141394	2.04189e-06	1.68975e-06	10.3187	9.81508	9.53694	9.52052
ERMAP	erythroblast membrane-associated protein (Scianna blood group)	114625	HGNC:15743|MIM:609017|Ensembl:ENSG00000164010|HPRD:12355|Vega:OTTHUMG00000007619	PRO2801|RD|SC	NM_018538	GTCCGAAGGCAAGGAAAAAGCTGATGGTCCTGTCCAAAGGCTATTAGGCA	chr1	43291248	43310660	+	N	N	N	N	II1	e0	-6.4	-5.93	0.47	0.107291	-0.123651	-0.120488	0.241107	0.160107	0.196817	7.2126	7.31989	7.08895	7.09211
ZNF691	zinc finger protein 691	51058	HGNC:28028|Ensembl:ENSG00000164011|HPRD:14229|Vega:OTTHUMG00000007623	Zfp691	NM_015911	GTGCCCCAACTTTGCTTCTAGATCTCTGGGGTGGGAGGAGTGACCTTCTC	chr1	43312243	43318146	+	N	N	N	N	II1	e0	-9.31	-7.21	2.1	0.0367382	0.141234	0.105683	0.894567	0.412556	0.622349	7.03927	7.07601	7.18051	7.14496
SLC2A1	solute carrier family 2 (facilitated glucose transporter), member 1	6513	HGNC:11005|MIM:138140|Ensembl:ENSG00000117394|HPRD:00683|Vega:OTTHUMG00000007657	DYT17|DYT18|DYT9|EIG12|GLUT|GLUT1|GLUT1DS|HTLVR|PED	NM_006516	AGGGCCTGTGGGAGCCTGCAAACTCACTGCTCAAGAAGACATGGAGACTC	chr1	43391045	43424847	-	N	N	N	N	II1	e0	-8.07	-4.72	3.35	-0.106652	-0.133147	-0.176942	0.866978	0.817854	0.774021	9.27698	9.17033	9.14383	9.10004
FAM183A	family with sequence similarity 183, member A	440585	HGNC:34347|Ensembl:ENSG00000186973|Vega:OTTHUMG00000007286	-	NM_001101376	GAATCCCCTCCGCAAGATTCATACAGTCACCAGGAAGCCCATGTCTTGGC	chr1	43613593	43622067	+	N	N	N	N	II1	e0	-8.23	-5.78	2.45	-0.116821	-0.0147169	0.0264788	0.448026	0.955291	0.924088	6.77286	6.65604	6.75815	6.79934
EBNA1BP2	EBNA1 binding protein 2	10969	HGNC:15531|MIM:614443|Ensembl:ENSG00000117395|HPRD:16849|Vega:OTTHUMG00000007284	EBP2|NOBP|P40	NM_006824	TGTATCTAGCTTCCGGGCCAAGACAGCTCATGGCAGAGGCCTCAAGAGGC	chr1	43629844	43637986	-	N	N	N	N	II1	e0	-5.85	-7.77	-1.92	0.494595	0.430692	0.312898	0.00144364	0.0041337	0.0352012	11.5354	12.03	11.9661	11.8483
WDR65	WD repeat domain 65	149465	HGNC:26485|MIM:614259|Ensembl:ENSG00000243710|HPRD:08717|Vega:OTTHUMG00000007285	VWS2	NM_001167965	GTCAGAATCACAAAGACAGAGTGGTGGTTGGCAGGGGCTGCAGGAAGGGG	chr1	43638000	43676549	+	N	N	N	N	II1	e0	-1.9	-2.4	-0.5	0.195161	0.00554042	0.0228983	0.0901123	0.981318	0.929282	6.82933	7.02449	6.83487	6.85223
TMEM125	transmembrane protein 125	128218	HGNC:28275|Ensembl:ENSG00000179178|HPRD:14457|Vega:OTTHUMG00000007288	-	NM_144626	TATGGGCTCTGCAATGAGACAGACCTGGAGGGGACTCTCCCGTTGAGCAC	chr1	43735664	43739673	+	N	N	N	N	II1	e0	-6.08	-2.76	3.32	-0.118959	0.0645918	-0.0693276	0.263319	0.640335	0.637542	6.80331	6.68436	6.86791	6.73399
C1orf210	chromosome 1 open reading frame 210	149466	HGNC:28755|Ensembl:ENSG00000253313|HPRD:14677|Vega:OTTHUMG00000007289	-	NM_001164829	TTTCCCCAGGCACCTTTGCTCACATTGGTCCCCCTGCCTACGCTACTCTT	chr1	43747556	43751288	-	N	N	N	N	II1	e0	-4.25	-6.55	-2.3	0.0235128	-0.0407133	0.0579967	0.900741	0.79625	0.715726	6.688	6.71151	6.64729	6.746
TIE1	tyrosine kinase with immunoglobulin-like and EGF-like domains 1	7075	HGNC:11809|MIM:600222|Ensembl:ENSG00000066056|HPRD:02572|Vega:OTTHUMG00000007282	JTK14|TIE	NM_005424	ATCCCACTGCTCCCCCAACACAAACCCCCACTCCAGCTCCTTCGCTTAAG	chr1	43766565	43788781	+	N	N	N	N	II1	e0	-7.02	-5.43	1.59	0.0219722	-0.0345929	0.00898765	0.918008	0.856207	0.972169	6.72633	6.7483	6.69174	6.73532
MPL	myeloproliferative leukemia virus oncogene	4352	HGNC:7217|MIM:159530|Ensembl:ENSG00000117400|HPRD:01161|Vega:OTTHUMG00000007429	C-MPL|CD110|MPLV|THCYT2|TPOR	NM_005373	GTCCTTTTCCCCCAGCACCTAGAGTAGTGCTTGGTGCATGATAGTAGGCC	chr1	43803474	43820135	+	N	N	N	N	II1	e0	-5.54	-7.68	-2.14	0.00457656	-0.0368761	-0.00960952	0.984709	0.851478	0.971684	6.61431	6.61889	6.57743	6.6047
CDC20	cell division cycle 20	991	HGNC:1723|MIM:603618|Ensembl:ENSG00000117399|HPRD:04686|Vega:OTTHUMG00000007420	CDC20A|bA276H19.3|p55CDC	NM_001255	AAGGCCAGTGCAGCCAAAAGCAGCCTCATCCACCAAGGCATCCGCTGAAG	chr1	43824625	43828873	+	N	N	N	N	II1	e0	-7.74	-6.54	1.2	0.119514	0.218471	0.0881771	0.83915	0.648127	0.903764	11.6729	11.7924	11.8914	11.7611
ELOVL1	ELOVL fatty acid elongase 1	64834	HGNC:14418|MIM:611813|Ensembl:ENSG00000066322|HPRD:10935|Vega:OTTHUMG00000007422	Ssc1	NM_001256402	TGGCCTCATTGCTGTCTGCCACTCCAGAGCTGGGGGCTAAAAGGGCTGTA	chr1	43829067	43833745	-	N	N	N	N	II1	e0	-9.84	-8.02	1.82	0.0525241	0.287965	0.274473	0.761001	0.00803028	0.0120618	7.81103	7.86355	8.09899	8.0855
MED8	mediator complex subunit 8	112950	HGNC:19971|MIM:607956|Ensembl:ENSG00000159479|HPRD:06991|Vega:OTTHUMG00000007421	ARC32	NM_052877	GTGGGGTACAAATGGCTCAGGCAGGTCAACCAGGGAAAATGCCAAGTGGA	chr1	43849578	43855483	-	N	N	N	N	II1	e0	-6.36	-5.93	0.43	0.185266	0.464364	0.364575	0.203845	0.00138224	0.00910149	8.40197	8.58723	8.86633	8.76654
SZT2	seizure threshold 2 homolog (mouse)	23334	HGNC:29040|Ensembl:ENSG00000198198|HPRD:11085|Vega:OTTHUMG00000007423	C1orf84|KIAA0467|RP11-506B15.3|SZT2A|SZT2B	NM_015284	TCTCTGCACCTCTTCCAGGATTCCCTGACTGTGCCAGCCCTCGTCCGTCT	chr1	43855555	43919918	+	N	N	N	N	II1	e0	-5.27	-5.08	0.19	0.0442612	0.0489866	-0.0174454	0.852821	0.827236	0.956073	6.80844	6.85271	6.85743	6.791
HYI	hydroxypyruvate isomerase (putative)	81888	HGNC:26948|Ensembl:ENSG00000178922|HPRD:11039|Vega:OTTHUMG00000007502	HT036	NM_001190880	TACTTCCTGGACACGCCCCAGCAGGCGGCAGCCATCTTACAGAAGGTAGG	chr1	43916673	43919660	-	N	N	N	N	II1	e0	-8.08	-6.85	1.23	-0.0676216	-0.0371283	-0.141827	0.58157	0.806596	0.148555	6.72726	6.65963	6.69013	6.58543
PTPRF	protein tyrosine phosphatase, receptor type, F	5792	HGNC:9670|MIM:179590|Ensembl:ENSG00000142949|HPRD:01552|Vega:OTTHUMG00000007501	LAR	NM_002840	GTCCCCAAACCTAGCTAGGCTAAGTCAAGATCAACATTCCAGGGTTGGTA	chr1	43996546	44089343	+	N	N	N	N	II1	e2	-5.98	-5.05	0.93	-0.500873	-0.87444	-0.838903	0.00877145	0.000107506	0.000171493	8.0994	7.59853	7.22496	7.2605
KDM4A	lysine (K)-specific demethylase 4A	9682	HGNC:22978|MIM:609764|Ensembl:ENSG00000066135|HPRD:17168|Vega:OTTHUMG00000007560	JHDM3A|JMJD2|JMJD2A|TDRD14A	NM_014663	GCAGAGCCCCTGTGGCAAAGTATTACAGGGTGTGGGTGGGGATTACCCTG	chr1	44115796	44171189	+	N	N	N	N	II1	e0	-6.11	-3.83	2.28	0.0939865	0.132093	0.0230942	0.620779	0.429039	0.9425	6.94111	7.03509	7.0732	6.9642
KDM4A-AS1	KDM4A antisense RNA 1	100132774	HGNC:40528	-	NR_033827	GTGAAGCCTGCAGTGAGCCAAGATCATGCCACCGTACTCCCGTACTCCAG	chr1	44165408	44173012	-	N	N	N	N	II1	e0	-7.68	-5.6	2.08	0.201458	0.485445	0.471634	0.387484	0.0137761	0.0179385	7.27845	7.4799	7.76389	7.75008
ST3GAL3	ST3 beta-galactoside alpha-2,3-sialyltransferase 3	6487	HGNC:10866|MIM:606494|Ensembl:ENSG00000126091|HPRD:05930|Vega:OTTHUMG00000007561	EIEE15|MRT12|SIAT6|ST3GALII|ST3GalIII|ST3N	NM_001270463	TAGCCTGGACCAAAGGGAAGTGAGGCCCAAGGAGCTTACCCAAGCTGTGG	chr1	44173203	44396837	+	N	N	N	N	II1	e0	-4.96	-4.96	0	0.0416721	-0.269935	-0.105027	0.929421	0.310319	0.812954	7.94962	7.99129	7.67968	7.84459
ARTN	artemin	9048	HGNC:727|MIM:603886|Ensembl:ENSG00000117407|HPRD:04863|Vega:OTTHUMG00000007705	ENOVIN|EVN|NBN	NM_001136215	TGCCCGGCCTGATCTCAGCCCGAGGACAGCCCCTCCTTGAGGTCCTTCCT	chr1	44398991	44402912	+	N	N	N	N	II1	e0	-8.6	-5.95	2.65	-0.0870788	-0.0769432	-0.0752566	0.572152	0.641335	0.683387	6.73113	6.64405	6.65419	6.65587
IPO13	importin 13	9670	HGNC:16853|MIM:610411|Ensembl:ENSG00000117408|HPRD:13742|Vega:OTTHUMG00000008297	IMP13|KAP13|LGL2|RANBP13	NM_014652	ACAAGAGGCGGGTGAAGGAGATGGTGAAGGAGTTCACACTGCTGTGCCGG	chr1	44412477	44433694	+	N	N	N	N	II1	e0	-7.62	-7.21	0.41	-0.169349	-0.0402785	-0.0161616	0.415229	0.900835	0.969283	7.97553	7.80618	7.93525	7.95937
DPH2	DPH2 homolog (S. cerevisiae)	1802	HGNC:3004|MIM:603456|Ensembl:ENSG00000132768|HPRD:16023|Vega:OTTHUMG00000008295	DPH2L2	NM_001384	CAAGTGTTCAGACAGCCACATGAGGGGACAGTGCAGCTACAGGATATGCC	chr1	44435652	44439043	+	N	N	N	N	II1	e1	-8.56	-6.88	1.68	0.773102	0.517392	0.494175	0.000117139	0.00326304	0.00512393	9.62621	10.3993	10.1436	10.1204
ATP6V0B	ATPase, H+ transporting, lysosomal 21kDa, V0 subunit b	533	HGNC:861|MIM:603717|Ensembl:ENSG00000117410|HPRD:04759|Vega:OTTHUMG00000008298	ATP6F|HATPL|VMA16	NM_004047	GGCCCTCCCTGCACTCCCCTCTTGCTGCGTGTTGATTTGGAGGCACTGCA	chr1	44440601	44443972	+	N	N	N	N	II1	e0	-9.39	-6.64	2.75	0.252083	0.336489	0.344758	0.195211	0.0679259	0.0667616	10.8307	11.0828	11.1672	11.1754
B4GALT2	UDP-Gal:betaGlcNAc beta 1,4- galactosyltransferase, polypeptide 2	8704	HGNC:925|MIM:604013|Ensembl:ENSG00000117411|HPRD:04928|Vega:OTTHUMG00000008296	B4Gal-T2|B4Gal-T3|beta4Gal-T2	NM_003780	GATCTTGGGGTTGGCCTTTGCATGGGAGGCAGGTGGGGCTTGGATCAGTA	chr1	44444873	44456843	+	N	N	N	N	II1	e0	-7.3	-6.47	0.83	-0.110979	0.0164942	-0.175808	0.649538	0.963925	0.422098	7.36949	7.25851	7.38598	7.19368
CCDC24	coiled-coil domain containing 24	149473	HGNC:28688|Ensembl:ENSG00000159214|HPRD:14636|Vega:OTTHUMG00000008299	RP5-1198O20.2	NM_152499	AGGCCTCCACAAAGGCCTGGCAGACAGAGGTCTCATTCCAGCCTGACTCT	chr1	44457279	44462198	+	N	N	N	N	II1	e1	-9.7	-5.02	4.68	0.0112705	0.551748	0.584348	0.980352	0.0114322	0.00870773	7.73969	7.75096	8.29144	8.32404
SLC6A9	solute carrier family 6 (neurotransmitter transporter, glycine), member 9	6536	HGNC:11056|MIM:601019|Ensembl:ENSG00000196517|HPRD:03010|Vega:OTTHUMG00000008294	GLYT1	NR_048549	GCAGTGACAGCCCCGGCCAAGCCACCTCTAATCCTCTGTAGCAATAACGG	chr1	44462154	44497164	-	N	N	N	N	II1	e0	-6.48	-5.39	1.09	-0.302332	-0.263019	-0.254237	0.0667635	0.123167	0.1569	7.14687	6.84454	6.88385	6.89264
KLF17	Kruppel-like factor 17	128209	HGNC:18830|MIM:609602|Ensembl:ENSG00000171872|HPRD:08272|Vega:OTTHUMG00000009664	ZNF393|Zfp393	NM_173484	CAGGCTCCTGCTCTTGTGGAGGTCACAATCTAGCGGAGAAAGGATGTTAC	chr1	44584521	44600809	+	N	N	N	N	II1	e0	-4.78	-6.01	-1.23	-0.118747	-0.110813	-0.212783	0.292911	0.342553	0.0372669	6.79049	6.67174	6.67968	6.57771
DMAP1	DNA methyltransferase 1 associated protein 1	55929	HGNC:18291|MIM:605077|Ensembl:ENSG00000178028|HPRD:05465|Vega:OTTHUMG00000007577	DNMAP1|DNMTAP1|EAF2|MEAF2|SWC4	NM_019100	CGGCAGTGACTGAACCCGGACTTGGTCCTGACCCCAAGGACACCATCATT	chr1	44679124	44686351	+	N	N	N	N	II1	e0	-5.82	-7	-1.18	0.453102	0.33506	0.381245	0.0846134	0.242454	0.187537	9.62855	10.0817	9.96361	10.0098
ERI3	ERI1 exoribonuclease family member 3	79033	HGNC:17276|MIM:609917|Ensembl:ENSG00000117419|HPRD:15175|Vega:OTTHUMG00000007637	PINT1|PRNPIP	NM_024066	CCTTGTGTCTACCCCCATCCCCGCTGTGAACGTGCCACTGAATAAAGTCG	chr1	44686741	44820939	-	N	N	N	N	II1	e0	-5.85	-4.43	1.42	0.150122	0.137954	0.160558	0.6093	0.65413	0.614678	8.75436	8.90448	8.89231	8.91492
RNF220	ring finger protein 220	55182	HGNC:25552|Ensembl:ENSG00000187147|HPRD:13336|Vega:OTTHUMG00000007697	C1orf164	NM_018150	GACAGTGCTCCTGGCCACCCAGCCTCTGCTGAGAACCATTCCTGGGATTA	chr1	44870959	45117396	+	N	N	N	N	II1	e0	-4.62	-3.87	0.75	0.413819	0.300419	0.24629	0.320988	0.536149	0.67068	9.20518	9.619	9.5056	9.45147
TMEM53	transmembrane protein 53	79639	HGNC:26186|Ensembl:ENSG00000126106|HPRD:07989|Vega:OTTHUMG00000007833	NET4	NM_024587	GCTGTAGAGGTTGACAAATGGAGGGGGGTGTTGAGGGTGAGCCCTAGTTG	chr1	45119500	45140099	-	N	N	N	N	II1	e0	-7.03	-6.99	0.04	0.114955	0.1246	0.0577022	0.427177	0.377225	0.79294	6.89499	7.00995	7.01959	6.95269
C1orf228	chromosome 1 open reading frame 228	339541	HGNC:34345|Ensembl:ENSG00000198520|HPRD:17525|Vega:OTTHUMG00000007834	NCRNA00082|p40	NM_001145636	CGCGCGATTCGGCTCAGATGGCCTACCTCACACACTTCGAGGAGGATGTA	chr1	45140393	45191263	+	N	N	N	N	II1	e1	-4.9	-5.45	-0.55	1.16993	1.26553	1.43086	2.47363e-08	1.03642e-08	2.93244e-09	6.96568	8.13561	8.2312	8.39653
KIF2C	kinesin family member 2C	11004	HGNC:6393|MIM:604538|Ensembl:ENSG00000142945|HPRD:05172|Vega:OTTHUMG00000008416	KNSL6|MCAK	NM_006845	CTGGGGTTGTCCTGGCTCTGGGGAGAGAGACGGAGCCTTTAGTACAGCTA	chr1	45205489	45233438	+	N	N	N	N	II1	e0	-6.09	-5.96	0.13	0.0524214	-0.219863	-0.129958	0.860145	0.208086	0.581829	9.78834	9.84076	9.56848	9.65839
RPS8	ribosomal protein S8	6202	HGNC:10441|MIM:600357|Ensembl:ENSG00000142937|HPRD:15969|Vega:OTTHUMG00000008494	S8	NM_001012	GTGCGGGGAGGTAACAAGAAATACCGTGCCCTGAGGTTGGACGTGGGGAA	chr1	45241245	45244412	+	N	N	N	N	II1	e0	-7.5	-11.45	-3.95	-0.00109518	0.00389602	-0.012387	0.996629	0.990121	0.974438	13.4336	13.4325	13.4375	13.4212
SNORD55	small nucleolar RNA, C/D box 55	26811	HGNC:10205	RNU39|RNU55|SNORD39|U39|U55	NR_000015	GTAATGCTGCATACTCCCGAGTGCGCGGTGGGGAAGCCAACCTTGGAGAG	chr1	45241536	45241610	+	N	N	N	N	II1	e0	-7.7	-13.16	-5.46	0.149756	-0.0257534	-0.0138318	0.262989	0.911747	0.96247	7.20572	7.35548	7.17997	7.19189
SNORD46	small nucleolar RNA, C/D box 46	94161	HGNC:10186	RNU40|RNU46|U40|U46	NR_000024	GAATCCTTAGGCGTGGTTGTGGCCGTCTTGGTCACCTGTGTGCCACTTGC	chr1	45242163	45242261	+	N	N	N	N	II1	e0	-6.77	-9.55	-2.78	-0.138422	-0.128755	-0.160283	0.437686	0.488629	0.381255	7.17752	7.0391	7.04877	7.01724
SNORD38A	small nucleolar RNA, C/D box 38A	94162	HGNC:30355	RNU38A|U38A	NR_001456	GTCCAGTTCTGCTACTGAAGGGAGAGAGATGAGAGCCTTTTAGGCTGAGG	chr1	45243513	45243584	+	N	N	N	N	II1	e0	-6.77	-9.55	-2.78	-0.283517	-0.379017	-0.450804	0.0134502	0.00184018	0.000480033	7.43227	7.14875	7.05325	6.98146
SNORD38B	small nucleolar RNA, C/D box 38B	94163	HGNC:30356	RNU38B|U38B	NR_001457	GTCCAGTTCTGCTACTGACAGTAAGTGAAGATAAAGTGTGTCTGAGGAGA	chr1	45244061	45244130	+	N	N	N	N	II1	e0	-8.04	-11.65	-3.61	0.129361	0.0118773	0.0225406	0.263883	0.956695	0.923028	6.73698	6.86634	6.74885	6.75952
BEST4	bestrophin 4	266675	HGNC:17106|MIM:607336|Ensembl:ENSG00000142959|HPRD:09549|Vega:OTTHUMG00000008488	VMD2L2	NM_153274	CAGGTGCACGGTTAGCTTCACAGCAACAGGGAGCTAGGCCATTGGTTCTC	chr1	45249256	45253426	-	N	N	N	N	II1	e0	-8.35	-7.37	0.98	-0.017936	0.0136964	-0.0282419	0.924871	0.945168	0.889916	6.84441	6.82647	6.8581	6.81616
PLK3	polo-like kinase 3	1263	HGNC:2154|MIM:602913|Ensembl:ENSG00000173846|HPRD:04222|Vega:OTTHUMG00000008491	CNK|FNK|PRK	NM_004073	AGGGAATCAGGGACCAGCTTTACTGGAGTTGGGGGCGGCTTGTCTTCGCT	chr1	45266035	45271667	+	N	N	N	N	II1	e0	-2.97	-4.65	-1.68	0.175582	0.212621	0.0399916	0.255861	0.146888	0.894728	6.90792	7.0835	7.12054	6.94791
TCTEX1D4	Tctex1 domain containing 4	343521	HGNC:32315|MIM:611713|Ensembl:ENSG00000188396|HPRD:15762	-	NM_001013632	CGGGTGGAAGGGAGAAATGGCAGTCTCTAAGACTCCGAGCGTACCTGGCT	chr1	45271585	45272957	-	N	N	N	N	II1	e0	-6.44	-5.2	1.24	0.0978987	-0.0439164	-0.0354878	0.500639	0.820062	0.883608	6.83026	6.92816	6.78635	6.79477
BTBD19	BTB (POZ) domain containing 19	149478	HGNC:27145|Ensembl:ENSG00000222009	-	NM_001136537	CCGGCAGGAACCACTCATCCCGGTGGAGCAGATTGTGGAGGCGTGGAAAT	chr1	45274153	45279801	+	N	N	N	N	II1	e0	-10.27	-6.82	3.45	-0.0164634	-0.123924	0.0609012	0.937126	0.284306	0.726067	6.75672	6.74026	6.6328	6.81762
PTCH2	patched 2	8643	HGNC:9586|MIM:603673|Ensembl:ENSG00000117425|HPRD:04722|Vega:OTTHUMG00000008490	PTC2	NM_003738	TGTACAAGGAAAGCCCAGAGATCCTGAGTCCACCAGCTCCACAGGGAGGC	chr1	45287937	45308616	-	N	N	N	N	II1	e0	-6.95	-9.38	-2.43	0.0278446	0.0298762	0.0298969	0.885995	0.871514	0.890034	6.65196	6.67981	6.68184	6.68186
EIF2B3	eukaryotic translation initiation factor 2B, subunit 3 gamma, 58kDa	8891	HGNC:3259|MIM:606273|Ensembl:ENSG00000070785|HPRD:09379|Vega:OTTHUMG00000008585	EIF-2B|EIF2Bgamma	NM_001261418	GGCCAGAGGATTGAAGCCAAAGCTAAACGAGTGAATGAGGTGATCGTGGG	chr1	45316193	45452394	-	N	N	N	N	II1	e0	-4.84	-4.89	-0.05	-0.21333	0.0929537	-0.0967931	0.10752	0.610376	0.622513	8.12509	7.91176	8.21804	8.02829
HECTD3	HECT domain containing E3 ubiquitin protein ligase 3	79654	HGNC:26117|Ensembl:ENSG00000126107|HPRD:13383|Vega:OTTHUMG00000008587	RP11-69J16.1	NM_024602	GTTCCTAGAGCTATGCACACCCCTGCCCCAGTTTACCGTTCCTCCCTCAG	chr1	45468219	45477027	-	N	N	N	N	II1	e0	-5.63	-7.57	-1.94	0.00852013	0.189907	0.20888	0.986	0.515661	0.490463	7.68716	7.69568	7.87707	7.89604
UROD	uroporphyrinogen decarboxylase	7389	HGNC:12591|MIM:613521|Ensembl:ENSG00000126088|HPRD:01441|Vega:OTTHUMG00000008949	PCT|UPD	NM_000374	GAGGAGGAGATCGGGCAGTTGGTGAAGCAGATGCTGGATGACTTTGGACC	chr1	45477804	45481341	+	N	N	N	N	II1	e0	-6.8	-6.44	0.36	-0.196189	-0.138995	-0.329428	0.130494	0.342436	0.0105753	10.3978	10.2016	10.2588	10.0684
ZSWIM5	zinc finger, SWIM-type containing 5	57643	HGNC:29299|Ensembl:ENSG00000162415|Vega:OTTHUMG00000008950	-	NM_020883	TTGTGGCTACTCAAGTCTTACTGTCCAGCCAAGGGCCCCTACGTCTCAGC	chr1	45482075	45672250	-	Y	N	Y	N	PI1	e0	-2.66	-3.8	-1.14	0.126236	0.0555652	0.0798125	0.245022	0.713102	0.580465	6.8856	7.01183	6.94116	6.96541
LINC01144	uncharacterized LOC400752	400752	-	-	NR_024270	CAAGATAGCCCATTCTGCCCCAGCACTCAGAGCCCTATTACCAAGGCCCC	chr1	45769581	45771291	+	N	N	N	N	II1	e0	-11.84	-8	3.84	-0.145513	-0.0526317	-0.129241	0.233903	0.771369	0.349777	6.90535	6.75984	6.85272	6.77611
HPDL	4-hydroxyphenylpyruvate dioxygenase-like	84842	HGNC:28242|Ensembl:ENSG00000186603|HPRD:17509|Vega:OTTHUMG00000007681	4-HPPD-L|GLOXD1|RP4-534D1.1	NM_032756	TCGAGTCCTCCCTGTGTCCCGCTGTGATTCTATTTCCTCCCACCCACTCC	chr1	45792544	45794346	+	N	N	N	N	II1	e0	-8.26	-2.82	5.44	0.105253	0.132723	0.0162052	0.497593	0.350903	0.956048	6.58329	6.68854	6.71601	6.59949
MUTYH	mutY homolog	4595	HGNC:7527|MIM:604933|Ensembl:ENSG00000132781|HPRD:05380|Vega:OTTHUMG00000007682	CYP2C|MYH	NM_001128425	TGGGTTCCAAAAGGTCCCAGGTGTCCTCTCCGTGCAGTCGGAAAAAGCCC	chr1	45794913	45806142	-	N	N	N	N	II1	e1	-10.01	-7.64	2.37	0.210695	0.321437	0.599082	0.575085	0.313326	0.0346145	9.13767	9.34836	9.4591	9.73675
TOE1	target of EGR1, member 1 (nuclear)	114034	HGNC:15954|MIM:613931|Ensembl:ENSG00000132773|HPRD:18212|Vega:OTTHUMG00000007678	-	NM_025077	CAGGTTATGTGATGGCCTATGTGGAAGTGAGCCAGGGACCGCAACCCTGC	chr1	45805341	45809650	+	N	N	N	N	II1	e0	-7.74	-6.85	0.89	0.0743509	-0.178615	-0.0172469	0.695273	0.188475	0.95509	7.87668	7.95103	7.69806	7.85943
TESK2	testis-specific kinase 2	10420	HGNC:11732|MIM:604746|Ensembl:ENSG00000070759|Vega:OTTHUMG00000007680	-	NM_007170	TTTCTATGCAAGGGGACAGCAAGGCAGCGTGGTGGTCATGGCTCTTAGCT	chr1	45809554	45956840	-	N	N	N	N	II1	e0	-3.21	-2.92	0.29	-0.442776	-0.35863	-0.39212	0.00145651	0.00702606	0.00414812	7.67617	7.2334	7.31754	7.28405
CCDC163P	coiled-coil domain containing 163, pseudogene	126661	HGNC:27003|Ensembl:ENSG00000236624|Vega:OTTHUMG00000007741	C1orf231	NR_033298	GGAGCACCCTTTCTAACCTGGAGCCCAGCATCTTTCAGCTCCATGCCCAG	chr1	45959597	45965751	-	N	N	N	N	II1	e0	-6.53	-6.35	0.18	0.000407288	-0.0706829	-0.0256345	0.997832	0.555752	0.89354	6.96887	6.96928	6.89819	6.94324
MMACHC	methylmalonic aciduria (cobalamin deficiency) cblC type, with homocystinuria	25974	HGNC:24525|MIM:609831|Ensembl:ENSG00000132763|HPRD:18585|Vega:OTTHUMG00000007742	RP11-291L19.3|cblC	NM_015506	CCTGTGGCGTCAGTCGCAGTGCTCTGGCCAACACTATAGCAGGGCTTATT	chr1	45965855	45976739	+	N	N	N	N	II1	e0	-7.47	-7.26	0.21	0.225978	0.0683494	0.0444676	0.11879	0.760366	0.882359	7.94062	8.1666	8.00897	7.98509
PRDX1	peroxiredoxin 1	5052	HGNC:9352|MIM:176763|Ensembl:ENSG00000117450|HPRD:01458|Vega:OTTHUMG00000007738	MSP23|NKEF-A|NKEFA|PAG|PAGA|PAGB|PRX1|PRXI|TDPX2	NM_181697	TTCTCCAAGCAGAAGTGAGCGCTGGGCTGTTTTAGTGCCAGGCTGCGGTG	chr1	45976706	45987610	-	N	N	N	N	II1	e1	-6.39	-7.75	-1.36	0.262243	0.719934	0.733102	0.0047054	5.00276e-07	4.03202e-07	12.9497	13.212	13.6697	13.6828
AKR1A1	aldo-keto reductase family 1, member A1 (aldehyde reductase)	10327	HGNC:380|MIM:103830|Ensembl:ENSG00000117448|HPRD:00069|Vega:OTTHUMG00000007740	ALDR1|ALR|ARM|DD3	NM_001202414	ATCTTGCTCAGGTGGCAGGTCCAGCGGAAAGTGATCTGCATCCCCAAAAG	chr1	46016454	46035723	+	N	N	N	N	II1	e1	-7.45	-7.64	-0.19	-0.0750802	0.73013	0.771107	0.674516	8.19803e-06	4.94365e-06	10.4983	10.4232	11.2284	11.2694
NASP	nuclear autoantigenic sperm protein (histone-binding)	4678	HGNC:7644|MIM:603185|Ensembl:ENSG00000132780|HPRD:04423|Vega:OTTHUMG00000007826	FLB7527|PRO1999	NM_152298	GAAAGTAGCCAAGGGGACTGATGGTGGACACTCCAGATGTGGTTGGAAGC	chr1	46049659	46084578	+	N	N	N	N	II1	e2	-7.41	-6.76	0.65	-0.487936	-0.584912	-0.474606	0.00185023	0.000425511	0.00256645	9.52955	9.04161	8.94464	9.05494
CCDC17	coiled-coil domain containing 17	149483	HGNC:26574|Ensembl:ENSG00000159588|HPRD:08155|Vega:OTTHUMG00000007822	-	NM_001190182	GGCCCTCACCACAGTTCTGACTTGCCCCCAGTGAGTTTCTGAACCCAAGT	chr1	46085715	46089731	-	N	N	N	N	II1	e0	-8.1	-6.89	1.21	0.252566	0.165291	0.184809	0.035392	0.206442	0.163149	6.66958	6.92215	6.83488	6.85439
GPBP1L1	GC-rich promoter binding protein 1-like 1	60313	HGNC:28843|Ensembl:ENSG00000159592|HPRD:15418|Vega:OTTHUMG00000040990	RP11-767N6.1	NM_021639	CAGCTTCTACTACCAGCCCTTGGGGCACTCACCCCTGTGATCAAGCAATC	chr1	46092975	46152302	-	N	N	N	N	II1	e0	-6.1	-4.71	1.39	0.145442	0.101166	0.123551	0.279308	0.523228	0.429675	8.57614	8.72158	8.67731	8.69969
TMEM69	transmembrane protein 69	51249	HGNC:28035|HPRD:14234	C1orf154|RP11-767N6.4	NM_016486	AGTGAGGAGCGCCTCTGCCTGGCCGCCTGACCATCTGGGAAGTGTGACAA	chr1	46153846	46160108	+	N	N	N	N	II1	e0	-8.58	-9.52	-0.94	0.0902036	0.157769	0.154192	0.610732	0.268483	0.316187	10.1183	10.2085	10.2761	10.2725
IPP	intracisternal A particle-promoted polypeptide	3652	HGNC:6108|MIM:147485|Ensembl:ENSG00000197429|HPRD:00940|Vega:OTTHUMG00000008004	KLHL27	NM_001145349	AGTCCCAGCACTTTGAGAGGCCGAGGTGAGACGGGAAGATGGCTTGAACT	chr1	46159997	46216485	-	N	N	N	N	II1	e0	-5.54	-5.93	-0.39	0.289238	0.0368519	0.309375	0.065067	0.900569	0.0539006	7.88951	8.17874	7.92636	8.19888
MAST2	microtubule associated serine/threonine kinase 2	23139	HGNC:19035|MIM:612257|Ensembl:ENSG00000086015|HPRD:11294|Vega:OTTHUMG00000008007	MAST205|MTSSK	NM_015112	TCAGGAGGGGCCAAGAACCAGGGGGCCATCAAAAGCATCGGGATTTGGCA	chr1	46269284	46501796	+	N	N	N	N	II1	e0	-3.39	-3.05	0.34	0.0965704	0.0649789	0.190415	0.730562	0.83458	0.408712	7.29677	7.39334	7.36175	7.48719
PIK3R3	phosphoinositide-3-kinase, regulatory subunit 3 (gamma)	8503	HGNC:8981|MIM:606076|Ensembl:ENSG00000117461|HPRD:05831|Vega:OTTHUMG00000008096	p55|p55-GAMMA	NM_001114172	TTGCTGTGCAATTGTTGGGGAGGGTAGGGGGAAAGGCGAGAGGAGATACT	chr1	46505811	46598708	-	N	N	N	N	II1	e0	-5.01	-4.57	0.44	0.0512163	0.0773722	0.106894	0.821373	0.69039	0.569675	7.07611	7.12732	7.15348	7.183
TSPAN1	tetraspanin 1	10103	HGNC:20657|MIM:613170|Ensembl:ENSG00000117472|HPRD:18232|Vega:OTTHUMG00000007602	NET1|TM4C|TM4SF	NM_005727	GATGCCTGACTTTCCTTCCATTGGTGGGTGGATGGGTGGGGGGCATTCCA	chr1	46640748	46651634	+	N	N	N	N	II1	e0	-8.09	-8.78	-0.69	0.199017	0.200577	0.0888743	0.281081	0.280094	0.761708	7.32784	7.52686	7.52842	7.41672
POMGNT1	protein O-linked mannose N-acetylglucosaminyltransferase 1 (beta 1,2-)	55624	HGNC:19139|MIM:606822|Ensembl:ENSG00000085998|HPRD:09493|Vega:OTTHUMG00000007604	GNTI.2|GnT I.2|LGMD2O|MDDGA3|MDDGB3|MDDGC3|MEB|MGAT1.2|gnT-I.2	NM_001243766	GGCCCACATGCTGACACAGACTCACTCAGAGACCCTTAGACACTGGACCA	chr1	46654352	46685977	-	N	N	N	N	II1	e0	-5.84	-4.88	0.96	0.256465	0.302093	0.0351229	0.176135	0.100667	0.931613	9.64806	9.90452	9.95015	9.68318
LURAP1	leucine rich adaptor protein 1	541468	HGNC:32327|Ensembl:ENSG00000171357|HPRD:18478|Vega:OTTHUMG00000007605	C1orf190|LRAP35a|LRP35A	NM_001013615	CTGCCAGGATGGGTAGCCCTTTGTACGGGTCCTTGGATGGTAGTAGGTCA	chr1	46669005	46686928	+	N	N	N	N	II1	e0	-4.8	-5	-0.2	-0.0248601	0.0403837	0.0345413	0.909413	0.829193	0.881734	6.80624	6.78138	6.84662	6.84078
RAD54L	RAD54-like (S. cerevisiae)	8438	HGNC:9826|MIM:603615|Ensembl:ENSG00000085999|HPRD:04683|Vega:OTTHUMG00000007772	HR54|RAD54A|hHR54|hRAD54	NM_003579	GCTGGTCTGGGTGTAGCTCTTAGAGGAAGGAGATAGGGAAAAGGGGCTCC	chr1	46713366	46744145	+	N	N	N	N	II1	e2	-6.32	-3.3	3.02	-0.454454	-0.688821	-0.312837	0.000215588	4.04829e-06	0.00486812	9.67825	9.22379	8.98942	9.36541
LRRC41	leucine rich repeat containing 41	10489	HGNC:16917|Ensembl:ENSG00000132128|HPRD:10102|Vega:OTTHUMG00000007810	MUF1|RP4-636H5.2	NM_006369	AGCAGGCACCCAGGCTTTAGAGAAGTATAGGGGGCTTCTTCCCTGCTGGG	chr1	46744071	46769038	-	N	N	N	N	II1	e0	-6.86	-6.3	0.56	0.407625	0.724846	0.374565	0.371726	0.0640191	0.471419	8.88941	9.29704	9.61426	9.26398
UQCRH	ubiquinol-cytochrome c reductase hinge protein	7388	HGNC:12590|MIM:613844|Ensembl:ENSG00000173660|HPRD:15629|Vega:OTTHUMG00000007813	QCR6|UQCR8	NM_006004	GTAACTGTAAGTTCACATCAACCTCATGGGTTTGGCTTGAGGCTGGTAGC	chr1	46769379	46782447	+	N	N	N	N	II1	e0	-5.92	-7.03	-1.11	-0.433942	-0.648209	-0.530287	0.352506	0.1181	0.252843	9.41635	8.9824	8.76814	8.88606
NSUN4	NOP2/Sun domain family, member 4	387338	HGNC:31802|MIM:615394|HPRD:14842	RP4-603I14.2|SHTAP	NR_045790	GTGCAGTCCACATGTGCATAAGGACCATGGGGAGCTTGTATTTGGGAATT	chr1	46805848	46830824	+	N	N	N	N	II1	e0	-3.69	-4.23	-0.54	-0.025931	0.00111088	-0.235505	0.920921	0.995896	0.0836595	8.69112	8.66518	8.69223	8.45561
FAAH	fatty acid amide hydrolase	2166	HGNC:3553|MIM:602935|Ensembl:ENSG00000117480|HPRD:04244|Vega:OTTHUMG00000007811	FAAH-1	NM_001441	TGTGTCTGCGGTTCATGCGGGAGGTGGAGCGACTGATGACCCCTGAAAAG	chr1	46859938	46879520	+	N	N	N	N	II1	e0	-4.41	-4.91	-0.5	-0.0610301	-0.026823	-0.110585	0.735504	0.901651	0.475104	6.88146	6.82043	6.85464	6.77088
LOC729041	fatty acid amide hydrolase pseudogene	729041	-	-	NR_045483	GGTGGACACCTTGGTCAAGAATCAGAGGGGGCCCAAGTGATAGGCTCCTG	chr1	46899498	46911374	+	N	N	N	N	II1	e0	-8.06	-6.92	1.14	-0.0320533	0.128406	0.143582	0.895367	0.388802	0.347752	6.82853	6.79648	6.95694	6.97211
DMBX1	diencephalon/mesencephalon homeobox 1	127343	HGNC:19026|MIM:607410|Ensembl:ENSG00000197587|HPRD:07593|Vega:OTTHUMG00000007982	MBX|OTX3|PAXB	NM_172225	CTTCTGTAGGCTTCCTGTCCCAGAGCCAATTATGGAAGTAAGGGCTTCCC	chr1	46972667	46979886	+	N	N	N	N	II1	e0	-6.56	-3.05	3.51	0.0954026	0.0666377	0.133043	0.51648	0.697169	0.340119	6.74288	6.83828	6.80952	6.87592
KNCN	kinocilin	148930	HGNC:26488|MIM:611455|HPRD:08117	Kino|L5	NM_001097611	GAGGGGGTGGGAATGGGGGATGTGGAGACTGAGCTGTGGAGAGTGTGGTT	chr1	47011315	47016887	-	N	N	N	N	II1	e0	-3.8	-4.95	-1.15	-0.090882	0.171424	-0.0527098	0.530501	0.139121	0.799449	6.99951	6.90863	7.17094	6.9468
MKNK1	MAP kinase interacting serine/threonine kinase 1	8569	HGNC:7110|MIM:606724|Ensembl:ENSG00000079277|HPRD:09468|Vega:OTTHUMG00000007983	MNK1	NM_001135553	ATCGGTGTCTGCTGCTGTGTCCCCAGGTCTTGTGTGGGTGGCACAGATCT	chr1	47023078	47069966	-	N	N	N	N	II1	e0	-4.63	-5.2	-0.57	-0.452928	-0.344168	-0.35024	0.00230578	0.015804	0.0153608	8.78772	8.3348	8.44356	8.43748
MOB3C	MOB kinase activator 3C	148932	HGNC:29800|Ensembl:ENSG00000142961|HPRD:17584|Vega:OTTHUMG00000007989	MOB1E|MOBKL2C	NM_145279	CAGAGGCTGTGGAGCGAGGGTAGTAGGAGCTTTTCCCAGAGTGCTGTGAC	chr1	47073386	47080805	-	N	N	N	N	II1	e1	-6.82	-6.9	-0.08	0.093234	0.506771	0.37481	0.788643	0.0154568	0.0842926	7.3299	7.42313	7.83667	7.70471
ATPAF1	ATP synthase mitochondrial F1 complex assembly factor 1	64756	HGNC:18803|MIM:608917|Ensembl:ENSG00000123472|HPRD:12332	ATP11|ATP11p	NM_001256418	CCCCCACTAGACTGTGAGCTCCTTGAGGGCCAGGACTTATCTCTGTTCGC	chr1	47100710	47131550	-	N	N	N	N	II1	e2	-5.69	-4.9	0.79	-0.259824	-0.693031	-0.872255	0.0716798	7.08057e-05	7.93043e-06	8.81901	8.55918	8.12598	7.94675
TEX38	testis expressed 38	374973	HGNC:29589|Ensembl:ENSG00000186118|Vega:OTTHUMG00000007991	ATPAF1-AS1|C1orf223|THEG4	NM_001145474	GCTCCACAGCAGCCCCAGGCCAGATCCCCATTCCCACTTCCCATCTTTCA	chr1	47137496	47139256	+	N	N	N	N	II1	e0	-10.48	-6.44	4.04	-0.0401752	0.0163108	-0.0323233	0.848518	0.946408	0.898089	6.85903	6.81886	6.87535	6.82671
EFCAB14	EF-hand calcium binding domain 14	9813	HGNC:29051|Ensembl:ENSG00000159658|HPRD:17191|Vega:OTTHUMG00000007992	KIAA0494|RP11-8J9.3	NM_014774	GTCACAGTTGAGGATTTTGGCTGTGATGGGCTCATACTCATAATGGCCTG	chr1	47140830	47184736	-	N	N	N	N	II1	e0	-7.11	-6.23	0.88	-0.0668403	-0.038948	-0.0903883	0.748437	0.870382	0.660573	9.45059	9.38375	9.41165	9.36021
CYP4B1	cytochrome P450, family 4, subfamily B, polypeptide 1	1580	HGNC:2644|MIM:124075|Ensembl:ENSG00000142973|HPRD:00491|Vega:OTTHUMG00000007984	CYPIVB1|P-450HP	NM_001099772	CCAGCTCAGCAAGCCTGTCACCTTTGTGGATGGCCGGTCTCTACCTGCAG	chr1	47264669	47285021	+	N	N	N	N	II1	e0	-2.12	-1.1	1.02	-0.116797	-0.0871573	-0.00957021	0.310595	0.509891	0.969225	6.83847	6.72167	6.75131	6.8289
CYP4Z2P	cytochrome P450, family 4, subfamily Z, polypeptide 2, pseudogene	163720	HGNC:24426|Ensembl:ENSG00000154198	-	NR_002788	CTCATTTTATCCACCCATCCTCCTGCCCCCCAGTTCTGCTGTGGAAATAC	chr1	47308766	47366147	-	N	N	N	N	II1	e0	-1.66	-1.13	0.53	0.0536932	0.109381	0.057226	0.746981	0.382714	0.756815	6.79261	6.8463	6.90199	6.84983
CYP4A11	cytochrome P450, family 4, subfamily A, polypeptide 11	1579	HGNC:2642|MIM:601310|Ensembl:ENSG00000187048|HPRD:03201|Vega:OTTHUMG00000008020	CP4Y|CYP4A2|CYP4AII	NM_000778	GTCTGCCCATACACCTGTCTCCTTCTTCCTGCCTGGCTTGTCTGTTCCTA	chr1	47394845	47407156	-	N	N	N	N	II1	e0	-4.14	-2.82	1.32	0.025411	0.0306368	-0.0149239	0.893467	0.860902	0.948146	6.66918	6.69459	6.69982	6.65426
CYP4X1	cytochrome P450, family 4, subfamily X, polypeptide 1	260293	HGNC:20244|MIM:614999|Ensembl:ENSG00000186377|HPRD:13110|Vega:OTTHUMG00000008017	CYPIVX1	NM_178033	TGTATGGTGGGAGGATTGGAGGTTGGTGGGATAGGGGTCTCTGTGAAGAG	chr1	47489239	47516423	+	N	Y	N	Y	IP1	e0	-4.79	-5.53	-0.74	-0.0993807	-0.0646826	0.0237798	0.503742	0.715791	0.927639	7.00969	6.91031	6.945	7.03347
CYP4Z1	cytochrome P450, family 4, subfamily Z, polypeptide 1	199974	HGNC:20583|Ensembl:ENSG00000186160|HPRD:13111|Vega:OTTHUMG00000008019	CYP4A20	NM_178134	CATCAGCATTCTGAAAATATTCATCACCATGATGTCTGAGAGTGTTCGGA	chr1	47533159	47583992	+	Y	Y	N	Y	IP1	e0	-2	-0.05	1.95	0.0254235	0.0577097	0.00698531	0.905722	0.731711	0.979489	6.64524	6.67067	6.70295	6.65223
CYP4A22	cytochrome P450, family 4, subfamily A, polypeptide 22	284541	HGNC:20575|MIM:615341|HPRD:16776	-	NM_001010969	ATGAGGAATGCCTTTCATGAGAATGACACCATCTACAGCCTGACCTCTGC	chr1	47603106	47614526	+	N	N	N	N	II1	e0	-3.57	-2.37	1.2	-0.0507819	-0.0151351	-0.0596015	0.73734	0.939144	0.7095	6.76251	6.71173	6.74737	6.70291
PDZK1IP1	PDZK1 interacting protein 1	10158	HGNC:16887|MIM:607178|Ensembl:ENSG00000162366|HPRD:06211|Vega:OTTHUMG00000007852	DD96|MAP17|RP1-18D14.5|SPAP	NM_005764	AGGCACATGGGATGGATGTCCAGTGCTACCACCCAAGCCCCCTCCTTCTT	chr1	47649260	47655771	-	N	N	N	N	II1	e0	-4.36	-4.33	0.03	-0.039021	-0.0853166	-0.0684652	0.838713	0.557069	0.697172	6.82165	6.78263	6.73633	6.75318
TAL1	T-cell acute lymphocytic leukemia 1	6886	HGNC:11556|MIM:187040|Ensembl:ENSG00000162367|HPRD:01753|Vega:OTTHUMG00000007847	SCL|TCL5|bHLHa17|tal-1	NM_001290405	CGGCCTTTTGGGGGTGGGTCTGGCCGTACTTGTGATTTCGATGGTACGTG	chr1	47681961	47697561	-	N	N	N	N	II1	e2	-8.53	-7.74	0.79	-0.551755	0.204771	-0.179338	0.000380635	0.159666	0.26621	8.60397	8.05221	8.80874	8.42463
STIL	SCL/TAL1 interrupting locus	6491	HGNC:10879|MIM:181590|Ensembl:ENSG00000123473|HPRD:01627|Vega:OTTHUMG00000007851	MCPH7|SIL	NM_001282936	CTCGAGATACAGCTTTTTGCAGTATGGTGGGTTGGTTTTGGTGTAACATC	chr1	47715810	47779819	-	N	N	N	N	II1	e0	-4.26	-4.47	-0.21	-0.101881	-0.254422	-0.00885998	0.326826	0.00595737	0.968035	9.59975	9.49787	9.34533	9.59089
CMPK1	cytidine monophosphate (UMP-CMP) kinase 1, cytosolic	51727	HGNC:18170|MIM:191710|Ensembl:ENSG00000162368|HPRD:18258|Vega:OTTHUMG00000007849	CK|CMK|CMPK|UMK|UMP-CMPK|UMPK	NR_046395	TAGGAATGAGTTCTTATCTAGTGTTGCAGGCCAGCAAATACAGAGGTGGT	chr1	47799468	47824547	+	N	N	N	N	II1	e0	-4.69	-5.83	-1.14	-0.268637	0.0871187	0.101734	0.510055	0.881835	0.879702	9.64171	9.37307	9.72883	9.74344
FOXE3	forkhead box E3	2301	HGNC:3808|MIM:601094|Ensembl:ENSG00000186790|HPRD:03058|Vega:OTTHUMG00000007954	FKHL12|FREAC8	NM_012186	GGGGGGCCGTGTCCATATAAAGCGGGTCGGCGGCCCCTGCGGTCCCGGAG	chr1	47881743	47883724	+	N	N	N	N	II1	e0	-8.3	-5.94	2.36	-0.0569548	-0.0861647	-0.0851758	0.830598	0.707724	0.744809	6.99671	6.93975	6.91054	6.91153
FOXD2-AS1	FOXD2 antisense RNA 1 (head to head)	84793	HGNC:44256|Ensembl:ENSG00000237424	-	NR_026878	ACAGCCAACCTGCTTCCTGCCTGCTCTTCTCCAAAAAGACTGTGAATCCA	chr1	47897806	47900313	-	N	N	N	N	II1	e0	-6.02	-5.12	0.9	-0.389228	-0.121937	-0.424543	0.00335832	0.44523	0.0019966	7.60151	7.21228	7.47957	7.17696
FOXD2	forkhead box D2	2306	HGNC:3803|MIM:602211|Ensembl:ENSG00000186564|HPRD:03735|Vega:OTTHUMG00000007950	FKHL17|FREAC-9|FREAC9	NM_004474	GCGCGCTGCTCTCGGCGTTCTCTGTCCACTGGGTGTGCATTGATTTAAAC	chr1	47901688	47906363	+	N	N	N	N	II1	e0	-8.26	-5	3.26	-0.365216	-0.312595	-0.352498	0.00707936	0.0201618	0.0104412	7.66884	7.30362	7.35624	7.31634
TRABD2B	TraB domain containing 2B	388630	HGNC:44200|MIM:614913	TIKI2	NM_001194986	GCCACCTCTACCACCCACCTCAGCTTGTCTGTCACCAAAGTCCTGCTGTG	chr1	48226199	48462562	-	N	N	N	N	II1	e0	-4.55	-3.84	0.71	0.109705	0.048432	0.168732	0.372052	0.774757	0.132403	6.77481	6.88451	6.82324	6.94354
SKINTL	Skint-like, pseudogene	391037	HGNC:33993	SKINT1|SKINTP	NR_026749	GGAGCGGACAGAGCTCCTGAAAGAAGCCATTGGAGAAGGTAAAGTGACCC	chr1	48567386	48648100	-	Y	Y	Y	N	PI1	e0	2.27	1.17	-1.1	-0.000282629	0.0910514	0.0525871	0.998663	0.496422	0.78202	6.68718	6.68689	6.77823	6.73976
SLC5A9	solute carrier family 5 (sodium/sugar cotransporter), member 9	200010	HGNC:22146|Ensembl:ENSG00000117834|HPRD:18060|Vega:OTTHUMG00000007959	SGLT4	NM_001135181	CTGTATTTAAGGGTAAGCCCCACAGCGGGCAGCACAAACAGCCTGGGAGC	chr1	48688356	48714316	+	N	N	N	N	II1	e0	-4.51	-3.68	0.83	0.1014	0.101329	0.0156084	0.544152	0.554084	0.959301	6.8727	6.9741	6.97403	6.88831
SPATA6	spermatogenesis associated 6	54558	HGNC:18309|MIM:613947|Ensembl:ENSG00000132122|HPRD:15430|Vega:OTTHUMG00000007794	HASH|SRF-1|SRF1	NM_019073	CGTGGCACTTTCCATTTGGATGACGGTGAATACTGGTCCAACAGGGCAGC	chr1	48761043	48937880	-	Y	Y	N	N	PP1	e0	2.8	2.78	-0.02	0.012001	-0.0283738	0.0192415	0.954776	0.879173	0.933629	6.81561	6.82761	6.78724	6.83485
AGBL4	ATP/GTP binding protein-like 4	84871	HGNC:25892|Ensembl:ENSG00000186094|HPRD:07487|Vega:OTTHUMG00000007793	CCP6	NM_032785	CTGAGCAGGTCGTGATACTGATGGACCTACCCTGCCTTGTTCTGTCCTCT	chr1	48998526	50489626	-	Y	Y	N	Y	IP1	e0	3.37	3.01	-0.36	0.0192729	0.0968008	0.0661385	0.930136	0.485571	0.7156	6.65073	6.67	6.74753	6.71687
BEND5	BEN domain containing 5	79656	HGNC:25668	C1orf165	NM_024603	CCGAGCCGGAGTTACGGAGCACTTTCAGTGAGGAAGCAAATACGTCGTCC	chr1	49193539	49242547	-	N	N	N	N	II1	e0	-4.67	-4.48	0.19	-0.426376	-0.174188	-0.28923	0.00561857	0.315733	0.0638313	7.76885	7.34247	7.59466	7.47962
ELAVL4	ELAV (embryonic lethal, abnormal vision, Drosophila)-like 4	1996	HGNC:3315|MIM:168360|Ensembl:ENSG00000162374|HPRD:01343|Vega:OTTHUMG00000007877	HUD|PNEM	NM_001144777	CCTCTGGCAGCTCTTTGGCCCCTTTGGAGCAGTGAACAACGTAAAGGTGA	chr1	50513685	50667540	+	Y	Y	Y	Y	AMB1	e0	2.07	0.76	-1.31	0.0455385	-0.0321253	0.00711721	0.838713	0.890827	0.982007	6.70344	6.74898	6.67132	6.71056
DMRTA2	DMRT-like family A2	63950	HGNC:13908|MIM:614804|Ensembl:ENSG00000142700|Vega:OTTHUMG00000007884	-	NM_032110	ATATTGGAAACTCGGGATGAATCCTGCCCACCTGCCCCTCTTGCCTGCGG	chr1	50883222	50889119	-	N	N	N	N	II1	e0	-6.24	-7.03	-0.79	0.00666743	0.0789503	0.0318092	0.977425	0.61583	0.894841	6.78333	6.78999	6.86228	6.81514
FAF1	Fas (TNFRSF6) associated factor 1	11124	HGNC:3578|MIM:604460|Ensembl:ENSG00000185104|HPRD:05124	HFAF1s|UBXD12|UBXN3A|hFAF1	NM_007051	AGATCTTCACCTGCACAGACCCGGGAACAGTCGGAAGAACAAATCACCGA	chr1	50906934	51425936	-	Y	N	Y	N	PI1	e0	-2.69	-3.27	-0.58	-0.334211	-0.30492	-0.320271	0.140974	0.193922	0.188378	9.34833	9.01412	9.04341	9.02806
CDKN2C	cyclin-dependent kinase inhibitor 2C (p18, inhibits CDK4)	1031	HGNC:1789|MIM:603369|Ensembl:ENSG00000123080|HPRD:04534|Vega:OTTHUMG00000008046	INK4C|p18|p18-INK4C	NM_078626	CCAGTCCTTCTGTCAGTCTCCGATGCCATCATGCAGCCTGGTTAGGAGCA	chr1	51435641	51440309	+	N	N	N	N	II1	e2	-9.98	-8.27	1.71	-0.689405	-0.333633	-0.37354	2.77788e-05	0.0110576	0.0056975	7.77784	7.08843	7.44421	7.4043
C1orf185	chromosome 1 open reading frame 185	284546	HGNC:28096|Ensembl:ENSG00000204006|Vega:OTTHUMG00000008084	-	NM_001136508	ACCTATTTTCTTGCTGCTGGTGCTGTCACTTTGGGAATTGGTTTCTTTGC	chr1	51567905	51613754	+	Y	N	Y	N	PI1	e0	-0.39	-0.66	-0.27	0.0576922	0.0967034	0.08854	0.729583	0.478123	0.566546	6.74142	6.79911	6.83813	6.82996
RNF11	ring finger protein 11	26994	HGNC:10056|MIM:612598|Ensembl:ENSG00000123091|HPRD:09955|Vega:OTTHUMG00000008190	SID1669	NM_014372	CACAGAAGTTTGGTGGTAATATTGAAAGAACTAGCATTGGGCAGAATGTG	chr1	51701944	51739119	+	N	N	N	N	II1	e0	-8.15	-5.53	2.62	-0.0157676	-0.002256	0.0849656	0.938106	0.990654	0.551887	6.71946	6.70369	6.7172	6.80443
TTC39A	tetratricopeptide repeat domain 39A	22996	HGNC:18657|Ensembl:ENSG00000085831|Vega:OTTHUMG00000008193	C1orf34|DEME-6	NM_001144832	GGCAGCAGAGCCCAATGGGCCAGAAGGGCCACAAAGACTCCCTTTACCCT	chr1	51752929	51810785	-	N	N	N	N	II1	e0	-5.43	-4.63	0.8	-0.0145558	0.064823	-0.0229806	0.944065	0.659975	0.918353	6.71691	6.70236	6.78174	6.69393
EPS15	epidermal growth factor receptor pathway substrate 15	2060	HGNC:3419|MIM:600051|Ensembl:ENSG00000085832|HPRD:08968|Vega:OTTHUMG00000008192	AF-1P|AF1P|MLLT5	NM_001981	CTGGCTCCAGGGCCTGTGCTTGAAAAGGACAGATAAGTATTGCCCAGAGC	chr1	51819934	51984995	-	Y	N	Y	N	PI1	e0	-2.49	-4.31	-1.82	-0.360371	-0.133536	-0.0246835	0.00959259	0.435948	0.938878	8.04957	7.6892	7.91604	8.02489
OSBPL9	oxysterol binding protein-like 9	114883	HGNC:16386|MIM:606737|Ensembl:ENSG00000117859|HPRD:09479	ORP-9|ORP9	NM_148908	TCTCACATTCCCCAATGGCTATGGAAGGTCTATCCTCACAGTGCCCTGGG	chr1	52082545	52254891	+	N	N	N	N	II1	e0	-4.41	-4.87	-0.46	-0.448926	-0.187537	-0.11676	0.113466	0.638076	0.828857	8.64507	8.19614	8.45753	8.52831
NRD1	nardilysin (N-arginine dibasic convertase)	4898	HGNC:7995|MIM:602651|Ensembl:ENSG00000078618|HPRD:04036|Vega:OTTHUMG00000008278	hNRD1|hNRD2	NM_001101662	CAGCAGTACCTCTTTGACCGCCTTGCCCACGAGATTGAAGCACTGAAGTC	chr1	52254865	52344609	-	N	N	N	N	II1	e0	-6	-5.31	0.69	-0.185898	-0.107685	-0.144891	0.672414	0.835013	0.793754	10.4904	10.3045	10.3827	10.3455
MIR761	microRNA 761	100313892	HGNC:37305|miRBase:MI0003941	hsa-mir-761	NR_031580	AGCAGGGTGAAACTGACACAGTTCTGGTGAGTTTCACTTTGCTGCTCCTC	chr1	52302015	52302074	-	N	N	N	N	II1	e0	-1.66	-8.29	-6.63	-0.102589	-0.199495	-0.112991	0.521672	0.118056	0.505172	6.94266	6.84007	6.74316	6.82967
RAB3B	RAB3B, member RAS oncogene family	5865	HGNC:9778|MIM:179510|Ensembl:ENSG00000169213|HPRD:01540|Vega:OTTHUMG00000008627	-	NM_002867	TTCCTATCGGGCTCCCTGCGGGGCTTTCTCTCACTACAAGTCAAGCTTGG	chr1	52373627	52456436	-	N	N	N	N	II1	e0	-4.4	-4.29	0.11	0.0484715	0.0685231	-0.0127794	0.814165	0.705049	0.964873	6.83069	6.87916	6.89921	6.81791
TXNDC12	thioredoxin domain containing 12 (endoplasmic reticulum)	51060	HGNC:24626|MIM:609448|Ensembl:ENSG00000117862|HPRD:11633|Vega:OTTHUMG00000008629	AG1|AGR1|ERP16|ERP18|ERP19|PDIA16|TLP19|hAG-1|hTLP19	NR_046406	GCATGCGTGTGCAGGACTGGCTGTGTGCTTGGACTCGGCTCCAGGTGGAA	chr1	52497768	52521843	-	N	N	N	N	II1	e0	-6.75	-7.6	-0.85	-0.00988581	0.0162874	-0.0201845	0.971018	0.950032	0.944499	11.1739	11.164	11.1902	11.1537
KTI12	KTI12 homolog, chromatin associated (S. cerevisiae)	112970	HGNC:25160|Ensembl:ENSG00000198841|HPRD:14471|Vega:OTTHUMG00000008630	RP11-91A18.3|TOT4	NM_138417	TGGGCTATCACAGAGCATTGACCATTGGCTTCCCTCATCTGAGGCGTGGG	chr1	52497776	52499472	-	N	N	N	N	II1	e0	-5.95	-10.99	-5.04	0.0171341	-0.193546	-0.170277	0.954776	0.219865	0.335918	9.14692	9.16405	8.95337	8.97664
BTF3L4	basic transcription factor 3-like 4	91408	HGNC:30547|Ensembl:ENSG00000134717|HPRD:17521|Vega:OTTHUMG00000008960	-	NM_001136497	TCCTCAACCACTCTCCTACTCTTGGCCTTGAACCTACCTCTGGGTTGGAT	chr1	52521856	52556388	+	N	N	N	N	II1	e0	-5.92	-5.32	0.6	-0.220162	-0.355562	-0.442102	0.133104	0.0128235	0.00308273	9.81098	9.59081	9.45541	9.36887
ZFYVE9	zinc finger, FYVE domain containing 9	9372	HGNC:6775|MIM:603755|Ensembl:ENSG00000157077|HPRD:04782|Vega:OTTHUMG00000008061	MADHIP|NSP|SARA|SMADIP	NM_007324	GGGTGAGGTGGCTCCAGTATGGGTACCGGATTCTCAGGCTCCAAATTGCA	chr1	52607765	52812358	+	N	N	N	N	II1	e0	-3.48	-3.66	-0.18	-0.0824634	-0.15003	-0.18812	0.473958	0.112365	0.0442918	6.93919	6.85673	6.78916	6.75107
CC2D1B	coiled-coil and C2 domain containing 1B	200014	HGNC:29386|Ensembl:ENSG00000154222|HPRD:12393|Vega:OTTHUMG00000008102	-	NM_032449	GGAGATTAGTGACTCACCTGCAGTTGGGAGCCAGCTACAACCCAAATCAT	chr1	52816264	52831877	-	N	N	N	N	II1	e0	-6.91	-6.17	0.74	-0.0848095	-0.0253864	-0.126823	0.415658	0.87173	0.183451	7.26408	7.17927	7.2387	7.13726
ORC1	origin recognition complex, subunit 1	4998	HGNC:8487|MIM:601902|Ensembl:ENSG00000085840|HPRD:03544|Vega:OTTHUMG00000008104	HSORC1|ORC1L|PARC1	NM_004153	ACCATGGCCGTGTGTTCTCACCTGGGCTCCTGTCGCCTCCTGCTTGTGGA	chr1	52838500	52870143	-	N	N	N	N	II1	e0	-5.78	-4.79	0.99	-0.226004	-0.296086	0.0318002	0.153652	0.0519293	0.92539	8.12373	7.89772	7.82764	8.15553
PRPF38A	PRP38 pre-mRNA processing factor 38 (yeast) domain containing A	84950	HGNC:25930|HPRD:10972	Prp38|RP5-965L7.1	NM_032864	CTCCCGAAAGGTCTAAGAAGAGCCACAAGAAGAGCCGGAGAGGGAATGAG	chr1	52870218	52883992	+	N	N	N	N	II1	e0	-5.07	-3.29	1.78	0.334047	0.455537	0.388114	0.0725533	0.0145815	0.0400631	8.13173	8.46578	8.58727	8.51984
ZCCHC11	zinc finger, CCHC domain containing 11	23318	HGNC:28981|MIM:613692|Ensembl:ENSG00000134744|HPRD:15700|Vega:OTTHUMG00000008200	PAPD3|TUT4	NM_001009881	CCGATGCACAGCAACCAGCCAATCCTGCTGTCTCAAGGGTATCCGTACCT	chr1	52888947	53018762	-	N	N	N	N	II1	e0	-4.24	-4.06	0.18	-0.311293	-0.0339164	0.146246	0.0535941	0.913777	0.512464	8.59153	8.28024	8.55762	8.73778
GPX7	glutathione peroxidase 7	2882	HGNC:4559|Ensembl:ENSG00000116157|HPRD:13606|Vega:OTTHUMG00000008322	CL683|GPX6|GPx-7|GSHPx-7|NPGPx	NM_015696	GAGAGCTCTTGACCAGTGAATCACCAGCCGATACGAACGTCTTGCCAACA	chr1	53068042	53074723	+	N	N	N	N	II1	e0	-8.17	-4.06	4.11	-0.042864	-0.0412336	-0.00524475	0.826354	0.829265	0.985187	6.79838	6.75552	6.75715	6.79314
FAM159A	family with sequence similarity 159, member A	348378	HGNC:28757|Ensembl:ENSG00000182183|HPRD:14678|Vega:OTTHUMG00000008330	PRO7171|WWLS2783	NM_001042693	GTGAACACAGGCATGGCGGCAGAAGTGCCAAAAGTGAGCCCTCTCCAGCA	chr1	53099065	53122737	+	N	N	N	N	II1	e0	-5.76	-2.84	2.92	-0.0391805	-0.11195	-0.0343122	0.808531	0.295415	0.859136	6.67838	6.63919	6.56643	6.64406
COA7	Sel1 repeat containing 1	65260	HGNC:25716|HPRD:07769	C1orf163	NM_023077	GCCCATCATGCTGAGGGAGCAGATTCTTCCCAAGGCAGCTTCAGCTAGGA	chr1	53152013	53164038	-	N	N	N	N	II1	e0	-7.89	-6.76	1.13	0.237151	0.043416	0.114695	0.175294	0.887693	0.659034	8.02232	8.25947	8.06574	8.13701
ZYG11B	zyg-11 family member B, cell cycle regulator	79699	HGNC:25820|Ensembl:ENSG00000162378|HPRD:13356|Vega:OTTHUMG00000008938	ZYG11	NM_024646	GGAAGTTGCCCTTACAGGTGGGACCTTTTGTGTTAATCTGTTTTCTCCCC	chr1	53192130	53293013	+	N	N	N	N	II1	e2	-3.38	-4.26	-0.88	-0.503563	-0.34561	-0.0641955	0.00435708	0.0456983	0.854423	8.78831	8.28474	8.4427	8.72411
ZYG11A	zyg-11 family member A, cell cycle regulator	440590	HGNC:32058|Ensembl:ENSG00000203995|HPRD:17399|Vega:OTTHUMG00000008923	ZYG11	NM_001004339	AGTGCAGTTCACAGCCAGTGCTTGCGCTCTCAACCTAACACGCCAGGGCC	chr1	53308182	53360247	+	N	N	N	N	II1	e0	-4.62	-3.62	1	-0.0049019	-0.0433303	-0.00518123	0.980976	0.788456	0.983636	6.66153	6.65663	6.6182	6.65635
ECHDC2	enoyl CoA hydratase domain containing 2	55268	HGNC:23408|Ensembl:ENSG00000121310|HPRD:07718|Vega:OTTHUMG00000008927	-	NM_018281	GGTGCTGATCCTACCACCTACTGCTACCTTCCTTAGCTTCACCCTGGCTA	chr1	53361581	53387446	-	N	N	N	N	II1	e0	-5.83	-4.18	1.65	-0.0402757	-0.0579575	0.0265702	0.828721	0.7235	0.910224	6.65274	6.61247	6.59479	6.67931
SCP2	sterol carrier protein 2	6342	HGNC:10606|MIM:184755|Ensembl:ENSG00000116171|HPRD:01700|Vega:OTTHUMG00000008936	NLTP|NSL-TP|SCP-2|SCP-CHI|SCP-X|SCPX	NM_001193617	TGTGCTACTGGTTCTACTGCTTTGTTTATGGCCCGCCAGCTGATTCAGGG	chr1	53392900	53517289	+	N	N	N	N	II1	e0	-2.6	-4.2	-1.6	-0.158104	-0.0874828	-0.113502	0.272144	0.638115	0.530572	7.46493	7.30683	7.37745	7.35143
PODN	podocan	127435	HGNC:23174|MIM:608661|Ensembl:ENSG00000174348|HPRD:10557|Vega:OTTHUMG00000008934	PCAN|SLRR5A	NM_001199080	GACCCAGCTGCACCTAGGAGACACCTTTGTTCTTCAGGCCTGTGGGGGAA	chr1	53527723	53551174	+	N	N	N	N	II1	e0	-7.78	-6.27	1.51	0.0121861	0.0750405	-0.00731184	0.969918	0.740137	0.984009	6.81075	6.82294	6.88579	6.80344
SLC1A7	solute carrier family 1 (glutamate transporter), member 7	6512	HGNC:10945|MIM:604471|Ensembl:ENSG00000162383|HPRD:09194|Vega:OTTHUMG00000008937	AAAT|EAAT5	NM_006671	GATGCTCTGGTGGAGCTGCCGATGGGGCCCTGGTGTCAGAACTCCCCAAA	chr1	53552850	53608304	-	N	N	N	N	II1	e0	-5.43	-6.49	-1.06	0.0759784	0.0579386	0.0160511	0.628303	0.739818	0.951931	6.86861	6.94459	6.92655	6.88466
CPT2	carnitine palmitoyltransferase 2	1376	HGNC:2330|MIM:600650|Ensembl:ENSG00000157184|HPRD:02802|Vega:OTTHUMG00000008942	CPT1|CPTASE|IIAE4	NM_000098	CTGGGGCCTGTGTAGCCAGTGGGTGCTATTCTGTGAAACTAATCATAAGC	chr1	53662100	53679869	+	N	N	N	N	II1	e0	-6.25	-5.33	0.92	-0.0900941	0.123728	0.117393	0.676302	0.51975	0.583777	9.13622	9.04613	9.25995	9.25362
C1orf123	chromosome 1 open reading frame 123	54987	HGNC:26059|Ensembl:ENSG00000162384|HPRD:07929|Vega:OTTHUMG00000008940	-	NM_017887	ACAGCTTCCCAAGCCCCATCAATAAAGCCCCTGTTCACGCTGCACTGGTG	chr1	53679771	53686289	-	N	N	N	N	II1	e0	-6.8	-6.8	0	0.0820977	-0.310202	-0.397914	0.846974	0.228366	0.111027	9.75815	9.84025	9.44795	9.36024
MAGOH	mago-nashi homolog, proliferation-associated (Drosophila)	4116	HGNC:6815|MIM:602603|Ensembl:ENSG00000162385|HPRD:04005|Vega:OTTHUMG00000008932	MAGOH1|MAGOHA	NM_002370	TCCTGACCGAGTGGGCCGGCAGGAGCTTGAAATCGTCATTGGAGATGAAC	chr1	53692563	53704282	-	N	N	N	N	II1	e1	-4.09	-5.03	-0.94	1.04525	0.417986	0.615842	5.43204e-06	0.0127894	0.000791927	8.24075	9.286	8.65874	8.85659
LRP8	low density lipoprotein receptor-related protein 8, apolipoprotein e receptor	7804	HGNC:6700|MIM:602600|HPRD:04002	APOER2|HSZ75190|LRP-8|MCI1	NM_004631	GAGACGTTTCCAGATCAGCCCAAGTTTACTATAGAGACTGGCCCAGGCAC	chr1	53708040	53793821	-	N	N	N	N	II1	e0	-5.82	-5.41	0.41	0.120968	0.210688	0.332916	0.336929	0.0546841	0.00364337	8.89972	9.02069	9.11041	9.23263
SLC25A3P1	solute carrier family 25 (mitochondrial carrier; phosphate carrier), member 3 pseudogene 1	163742	HGNC:26869|Ensembl:ENSG00000236253	-	NR_002314	TCAAGGTCTATTTCAAGCTGCCTCGCCCTCCCGTGGCTCAAGCGCCCGAA	chr1	53904042	53905693	-	N	N	N	N	II1	e0	-4.95	2.42	7.37	-0.0148377	-0.0388322	0.00133807	0.950915	0.849748	0.995977	6.75628	6.74145	6.71745	6.75762
DMRTB1	DMRT-like family B with proline-rich C-terminal, 1	63948	HGNC:13913|MIM:614805|Ensembl:ENSG00000143006|HPRD:16828|Vega:OTTHUMG00000008080	-	NM_033067	TTCCTGGCCACAGCCCCTTGCCCCTCCTCTAAGGGGTTTTACTAGCAAGC	chr1	53925071	53933158	+	N	N	N	N	II1	e0	-7.41	-7.26	0.15	-0.0266563	-0.0204912	0.0743961	0.894729	0.918488	0.637383	6.77615	6.74949	6.75566	6.85054
GLIS1	GLIS family zinc finger 1	148979	HGNC:29525|MIM:610378|Ensembl:ENSG00000174332|HPRD:13581|Vega:OTTHUMG00000008079	-	NM_147193	TGGGCCACATCCCCTCCATCTACACAGACACCTGAAGGAGCCCCCACATG	chr1	53971905	54199877	-	N	N	N	N	II1	e0	-5.23	-4.54	0.69	-0.0143702	0.0884396	0.0160926	0.942914	0.474374	0.944162	6.7664	6.75203	6.85484	6.7825
NDC1	NDC1 transmembrane nucleoporin	55706	HGNC:25525|MIM:610115|Ensembl:ENSG00000058804|HPRD:08547|Vega:OTTHUMG00000008073	NET3|TMEM48	NM_018087	CCTCATGCTTCCAGTAAACCACCCCGGATTTCAGGAAGCCTTGTGGACAC	chr1	54231133	54304225	-	N	N	N	N	II1	e0	-4.68	-4.33	0.35	0.152054	-0.0196417	0.175876	0.234863	0.934481	0.173963	8.40628	8.55834	8.38664	8.58216
YIPF1	Yip1 domain family, member 1	54432	HGNC:25231|Ensembl:ENSG00000058799|HPRD:13147|Vega:OTTHUMG00000008074	DJ167A19.1|FinGER1	NR_036639	CTACCTGGGGGATCCTCTTCTCTCCAAATGTTAGCCATCCTGAAGTAGCC	chr1	54317391	54355487	-	N	N	N	N	II1	e0	-3.31	-3.34	-0.03	-0.0436621	0.102876	-0.104478	0.804047	0.415679	0.443699	9.26988	9.22622	9.37276	9.1654
DIO1	deiodinase, iodothyronine, type I	1733	HGNC:2883|MIM:147892|Ensembl:ENSG00000211452|HPRD:01002|Vega:OTTHUMG00000008435	5DI|TXDI1	NM_000792	CTAGCCTCACTTTTCAACAGAGTCATCTAGAAGGGAGGGTTGGCTTCCCA	chr1	54359860	54376759	+	N	N	N	N	II1	e0	-6.71	-4.61	2.1	0.141993	0.0881347	0.0813582	0.203617	0.519316	0.598834	6.60556	6.74755	6.69369	6.68691
HSPB11	heat shock protein family B (small), member 11	51668	HGNC:25019|Ensembl:ENSG00000081870|Vega:OTTHUMG00000008408	C1orf41|HSPCO34|IFT25|PP25	NM_016126	GGTCCGGCGCCCAGAGCTAACGGGAGTCCCAGGTTAAACACTTTAAGATG	chr1	54387233	54411288	-	N	N	N	N	II1	e0	-6.66	-2.99	3.67	-0.0842857	-0.160209	-0.0401989	0.64625	0.260135	0.882804	9.70397	9.61968	9.54376	9.66377
LRRC42	leucine rich repeat containing 42	115353	HGNC:28792|Ensembl:ENSG00000116212|HPRD:14711|Vega:OTTHUMG00000008436	dJ167A19.4	NM_052940	TGACCTTTCTCTGGCCCCCAGCTCTAGTGTTTGAGTAAAGGAGACTGAGG	chr1	54411998	54433841	+	N	N	N	N	II1	e0	-3.59	-7.22	-3.63	-0.263909	-0.172204	-0.0462699	0.0295847	0.188032	0.851104	9.42241	9.1585	9.2502	9.37614
LDLRAD1	low density lipoprotein receptor class A domain containing 1	388633	HGNC:32069|HPRD:17372	-	NM_001276395	CCCTGCGGCCCTGGGTGGTGGCGCTGTCCTTCAACCTTCTTCAAGTACTG	chr1	54472970	54483859	-	N	N	N	N	II1	e0	-4.84	-6.39	-1.55	0.0344096	0.0460574	0.0101525	0.836303	0.757324	0.964438	6.76561	6.80002	6.81167	6.77576
TMEM59	transmembrane protein 59	9528	HGNC:1239|Ensembl:ENSG00000116209|HPRD:12731|Vega:OTTHUMG00000008437	C1orf8|HSPC001	NM_004872	GAGCTGATCATTGCTCCTTCTCACCTCCTGCCATGATACTGTCAGTTACC	chr1	54497348	54519111	-	N	N	N	N	II1	e0	-5.36	-5.83	-0.47	-0.410372	-0.183925	-0.203137	0.000317704	0.0712659	0.0486808	10.4304	10.02	10.2465	10.2273
TCEANC2	transcription elongation factor A (SII) N-terminal and central domain containing 2	127428	HGNC:26494|Ensembl:ENSG00000116205|HPRD:08722|Vega:OTTHUMG00000008434	C1orf83|RP4-758J24.3	NM_153035	GCAGACATCCCTCCCAATCTTGCCCACACACTGAGAAGTAACTCGGAGCT	chr1	54519273	54565416	+	N	N	N	N	II1	e0	-5.27	-3.74	1.53	-0.0984414	-0.146847	-0.189604	0.561048	0.31103	0.175456	7.64485	7.54641	7.49801	7.45525
CDCP2	CUB domain containing protein 2	200008	HGNC:27297|MIM:612320|HPRD:14122	-	NM_201546	ACATGGTGCTTGTTTTTCCTCACTCAACAGGAAGCCTGGAGCTAGGCAGC	chr1	54604667	54618679	-	N	N	N	N	II1	e0	-4.45	-1.12	3.33	-0.0188398	0.0530007	0.0458311	0.931902	0.759453	0.829369	6.75482	6.73598	6.80782	6.80065
CYB5RL	cytochrome b5 reductase-like	606495	HGNC:32220|Ensembl:ENSG00000215883	-	NM_001031672	CCCCTCCAAGCTGAACCCAGAGACCTTCGTGGCCTTCTGCATCATTGCCA	chr1	54638026	54665746	-	N	N	N	N	II1	e0	-5.33	-3.96	1.37	-0.0488626	-0.0622915	0.0679069	0.784482	0.702068	0.701225	6.99425	6.94539	6.93196	7.06216
MRPL37	mitochondrial ribosomal protein L37	51253	HGNC:14034|MIM:611843|Ensembl:ENSG00000116221|HPRD:14757|Vega:OTTHUMG00000008118	L37mt|MRP-L2|MRP-L37|MRPL2|RPML2	NM_016491	AGCCTCAGTGCCCGTTTGGCCTGCTGCTCTCGCTGACAATAAAGAGCCCT	chr1	54665839	54684056	+	N	N	N	N	II1	e0	-5.73	-5.71	0.02	0.391137	0.263525	0.233016	0.15298	0.406926	0.523011	11.695	12.0862	11.9585	11.928
SSBP3	single stranded DNA binding protein 3	23648	HGNC:15674|MIM:607390|Ensembl:ENSG00000157216|HPRD:09578|Vega:OTTHUMG00000008264	CSDP|SSDP|SSDP1	NM_018070	ATAAGTGGCATTAGCAATCCTCCAGGCACCCCTCGAGATGACGGCGAGCT	chr1	54691103	54872068	-	N	N	N	N	II1	e0	-6.34	-6.22	0.12	-0.861895	-0.89025	-0.816154	0.180113	0.16496	0.241656	8.65188	7.78999	7.76163	7.83573
ACOT11	acyl-CoA thioesterase 11	26027	HGNC:18156|MIM:606803|Ensembl:ENSG00000162390|HPRD:07075|Vega:OTTHUMG00000009891	BFIT|STARD14|THEA|THEM1	NM_147161	AGGACCTTGCCTCTCTGGAATCTGTCAACCCAGTTTTGGGCTCCAGGTGG	chr1	55013806	55076005	+	N	N	N	N	II1	e0	-6.77	-4.79	1.98	-0.0529022	-0.108376	-0.0402991	0.72135	0.327864	0.829777	6.95643	6.90353	6.84805	6.91613
FAM151A	family with sequence similarity 151, member A	338094	HGNC:25032|Ensembl:ENSG00000162391|HPRD:11326|Vega:OTTHUMG00000009888	C1orf179	NM_176782	TGGAGTGGCTGGTTCCTGACGTCCAGGGCAGCGGTAAAACAGCAACAATG	chr1	55074849	55089200	-	N	N	N	N	II1	e0	-6.14	-1.79	4.35	-0.0198019	-0.0317475	-0.0929265	0.956891	0.928054	0.76591	6.94981	6.93001	6.91806	6.85688
MROH7	maestro heat-like repeat family member 7	374977	HGNC:24802|Ensembl:ENSG00000184313|HPRD:10993|Vega:OTTHUMG00000009890	C1orf175|HEATR8	NR_026782	TCATGCAGGCACTGGGCTCCTGGAAGATGTCCTTGAAGAAGTGACGTCCC	chr1	55107426	55175939	+	N	N	N	N	II1	e0	-3.68	-2.44	1.24	-0.0110112	0.0108371	0.0426357	0.969196	0.968726	0.874752	6.77732	6.76631	6.78815	6.81995
TTC4	tetratricopeptide repeat domain 4	7268	HGNC:12394|MIM:606753|Ensembl:ENSG00000243725|HPRD:08417|Vega:OTTHUMG00000009914	-	NM_004623	TGGAGGACTGTGACAGACTTTGGACAGTGGCCTCTTGAGTTCCTCTGCAG	chr1	55181494	55208328	+	N	N	N	N	II1	e0	-6.24	-6.82	-0.58	0.431918	0.310064	0.305174	0.000224578	0.00331166	0.00418273	10.307	10.7389	10.6171	10.6122
PARS2	prolyl-tRNA synthetase 2, mitochondrial (putative)	25973	HGNC:30563|MIM:612036|Ensembl:ENSG00000162396|HPRD:13220|Vega:OTTHUMG00000009915	MT-PRORS	NM_152268	GGGCTGAGAGTATGGGGAAAAGAATCAAGAGACCTGACTGCCGCCAACTC	chr1	55222570	55230226	-	N	N	N	N	II1	e0	-8.19	-6.82	1.37	0.0797282	0.141786	0.0956815	0.722008	0.425286	0.681161	7.21889	7.29862	7.36068	7.31457
TTC22	tetratricopeptide repeat domain 22	55001	HGNC:26067|Ensembl:ENSG00000006555|HPRD:07932|Vega:OTTHUMG00000009916	-	NM_017904	ACTTAGGTGAGTTCTGCCTCCTGCTAGCTTCCCGCACTGGTCCCAGACCT	chr1	55250223	55266941	-	N	N	N	N	II1	e0	-8.49	-5.94	2.55	-0.034175	-0.103487	-0.0327383	0.868374	0.452484	0.889687	6.84871	6.81453	6.74522	6.81597
C1orf177	chromosome 1 open reading frame 177	163747	HGNC:26854|Ensembl:ENSG00000162398|HPRD:08807|Vega:OTTHUMG00000009986	-	NM_152607	GACAGCCTGCAGTGACCAGAGAGCCCAAAGGCCTGAAGACAAATCTGGGG	chr1	55271735	55307937	+	N	N	N	N	II1	e0	-5.29	-3.88	1.41	0.0122377	0.114067	-0.157752	0.960739	0.418306	0.230978	7.16074	7.17298	7.27481	7.00299
DHCR24	24-dehydrocholesterol reductase	1718	HGNC:2859|MIM:606418|Ensembl:ENSG00000116133|HPRD:05916|Vega:OTTHUMG00000009989	DCE|Nbla03646|SELADIN1|seladin-1	NM_014762	CTTGGATATTACTGAAAGGGAGGGGTGGAGATGGGTGTGGCAGTGTATGG	chr1	55315299	55352921	-	N	N	N	N	II1	e1	-6.48	-4.71	1.77	0.0222762	0.921313	0.409709	0.94879	1.88093e-05	0.0155992	8.86472	8.887	9.78604	9.27443
TMEM61	transmembrane protein 61	199964	HGNC:27296|Ensembl:ENSG00000143001|HPRD:14121|Vega:OTTHUMG00000009991	-	NM_182532	CCTGGCCTCCACCCAGCTATGAGAGCATCAGCCTTGCTCTTGATGCCGTT	chr1	55446464	55457966	+	N	N	N	N	II1	e0	-6.85	-7.28	-0.43	-0.0853966	0.0105407	-0.0836779	0.545169	0.963593	0.598153	6.90308	6.81768	6.91362	6.8194
BSND	Bartter syndrome, infantile, with sensorineural deafness (Barttin)	7809	HGNC:16512|MIM:606412|HPRD:05914	BART|DFNB73	NM_057176	TACCCAAGGACAAAGGTGGAGGAGAAGGAGGCTTCGGACACAGGTGGGGA	chr1	55464616	55474465	+	N	N	N	N	II1	e0	-7.29	-3.86	3.43	0.0984814	0.0362727	0.0324502	0.451953	0.844131	0.885677	6.69317	6.79165	6.72944	6.72562
PCSK9	proprotein convertase subtilisin/kexin type 9	255738	HGNC:20001|MIM:607786|Ensembl:ENSG00000169174|HPRD:07080|Vega:OTTHUMG00000008136	FH3|HCHOLA3|LDLCQ1|NARC-1|NARC1|PC9	NM_174936	CTGGCGGAGATGCTTCTAAGGCATGGTCGGGGGAGAGGGCCAACAACTGT	chr1	55505148	55530526	+	N	N	N	N	II1	e0	-5.69	-4.73	0.96	0.0811173	0.0388967	0.0556327	0.660783	0.865588	0.820159	6.74647	6.82759	6.78537	6.8021
USP24	ubiquitin specific peptidase 24	23358	HGNC:12623|MIM:610569|Ensembl:ENSG00000162402|Vega:OTTHUMG00000008135	-	NM_015306	CTAGAGTGCCGTATCATCAGACTTACCCTGTCCTGCCCCACCTTCCCTGC	chr1	55532031	55681039	-	N	N	N	N	II1	e0	-4.98	-4.26	0.72	-0.0114789	0.125208	-0.00509804	0.973183	0.540589	0.989075	9.37771	9.36624	9.50292	9.37262
PPAP2B	phosphatidic acid phosphatase type 2B	8613	HGNC:9229|MIM:607125|Ensembl:ENSG00000162407|HPRD:06179|Vega:OTTHUMG00000008160	Dri42|LPP3|PAP2B|VCIP	NM_003713	CCATATGGATCAACCACATGCACATCCTTACTACAGAATCCGTCCTTTCA	chr1	56960418	57045257	-	N	N	N	N	II1	e0	-2.73	-1.92	0.81	-0.0234588	0.0349548	-0.0553225	0.922898	0.874651	0.809873	6.78649	6.76303	6.82144	6.73117
PRKAA2	protein kinase, AMP-activated, alpha 2 catalytic subunit	5563	HGNC:9377|MIM:600497|Ensembl:ENSG00000162409|HPRD:02735|Vega:OTTHUMG00000008282	AMPK|AMPK2|AMPKa2|PRKAA	NM_006252	CTGCCTAGTGTATTCAACAGAAGGACTGTGGTCATGTAACAGGTAACCAC	chr1	57110989	57181008	+	Y	N	Y	N	PI1	e0	0.11	-0.92	-1.03	0.045057	-0.0366832	0.0467517	0.842648	0.873924	0.856194	6.67271	6.71777	6.63603	6.71946
C1orf168	chromosome 1 open reading frame 168	199920	HGNC:27295|Ensembl:ENSG00000187889|HPRD:14120|Vega:OTTHUMG00000008281	-	NM_001004303	ATCATGCCTTATGGCACCTAGTCAGTTGTGCAGATGGTTAGTTTGCTTCT	chr1	57184476	57285369	-	Y	N	Y	N	PI1	e0	-1.01	-0.86	0.15	0.0994571	0.0870205	0.082608	0.391059	0.482585	0.550054	6.71587	6.81533	6.80289	6.79848
C8A	complement component 8, alpha polypeptide	731	HGNC:1352|MIM:120950|Ensembl:ENSG00000157131|HPRD:00409|Vega:OTTHUMG00000008306	-	NM_000562	TTGTTCTGCCAGCTTCCAGGCCTAAGACTAGGTTTTGCTGTCTACAGCCA	chr1	57320442	57383894	+	N	N	N	N	II1	e0	-1.81	-2.1	-0.29	-0.0633356	-0.0852725	0.0124104	0.734259	0.610845	0.96623	6.67107	6.60773	6.5858	6.68348
C8B	complement component 8, beta polypeptide	732	HGNC:1353|MIM:120960|Ensembl:ENSG00000021852|HPRD:00410|Vega:OTTHUMG00000008305	C82	NM_001278544	CCCTGTCCTGAAAGGATCACGCTGTGACTGCATCTGTCCTGTTGGATCCC	chr1	57394882	57431813	-	N	N	N	N	II1	e0	-3.41	-2.74	0.67	0.109057	-0.00231321	0.0172096	0.356445	0.990647	0.942575	6.79573	6.90479	6.79342	6.81294
DAB1	Dab, reelin signal transducer, homolog 1 (Drosophila)	1600	HGNC:2661|MIM:603448|Ensembl:ENSG00000173406|HPRD:04582|Vega:OTTHUMG00000008391	-	NM_021080	CCAGCAAAAGCGAAGAGCAAGAAGCTCCTGATGGATCACAGGCCTCATCC	chr1	57463578	58716211	-	Y	Y	Y	Y	AMB1	e0	-1.83	-2.02	-0.19	-0.103314	-0.125065	-0.0867964	0.409388	0.285352	0.559656	6.73781	6.6345	6.61275	6.65102
OMA1	OMA1 zinc metallopeptidase	115209	HGNC:29661|Ensembl:ENSG00000162600|HPRD:14879|Vega:OTTHUMG00000010068	2010001O09Rik|DAB1|MPRP-1|YKR087C|ZMPOMA1|peptidase	NM_145243	AGCCTGCATGGCCAACCCAAGATGCCAGAATGGTTATCTACACACCCTTC	chr1	58946390	59012446	-	Y	N	Y	N	PI1	e0	-2.39	-3.97	-1.58	-0.182524	0.0743269	0.457708	0.104949	0.64018	0.000299139	8.79251	8.60999	8.86684	9.25022
TACSTD2	tumor-associated calcium signal transducer 2	4070	HGNC:11530|MIM:137290|Ensembl:ENSG00000184292|HPRD:00672|Vega:OTTHUMG00000010067	EGP-1|EGP1|GA733-1|GA7331|GP50|M1S1|TROP2	NM_002353	GAGGACAGACATTGCCCGGAAACTCAGTCTATTTATTCTTCAGCTTGCCC	chr1	59041094	59043166	-	N	N	N	N	II1	e0	-6.79	-4.17	2.62	-0.125629	-0.121951	-0.0600848	0.269438	0.291812	0.729213	6.69704	6.57141	6.57509	6.63696
MYSM1	Myb-like, SWIRM and MPN domains 1	114803	HGNC:29401|MIM:612176|Ensembl:ENSG00000162601|Vega:OTTHUMG00000009533	2A-DUB|2ADUB|RP4-592A1.1	NM_001085487	GGAGTGTATGAGGAAGACTCTGAGCAAAGTGACCAATTGCTTTATGGCTG	chr1	59120410	59165747	-	N	N	N	N	II1	e0	-2.72	-5.09	-2.37	0.0123017	0.0457469	0.0961203	0.947236	0.745815	0.400667	6.7569	6.7692	6.80264	6.85302
JUN	jun proto-oncogene	3725	HGNC:6204|MIM:165160|Ensembl:ENSG00000177606|HPRD:01302|Vega:OTTHUMG00000008376	AP-1|AP1|c-Jun	NM_002228	GGGAGGTTTGTGAGAGCGAGGCTGAGCCTACAGATGAACTCTTTCTGGCC	chr1	59246462	59249785	-	N	N	N	N	II1	e1	-6.29	-7.8	-1.51	0.527186	0.0436683	0.0823321	0.00109162	0.873674	0.755306	7.28727	7.81445	7.33093	7.3696
LINC01135	uncharacterized LOC100131060	100131060	Ensembl:ENSG00000234807	-	NR_034015	GTCAACAAGGGAAATGGAAAGGGAGAGACCCAGCCTCCACAGGGGCTCAC	chr1	59250822	59365384	+	N	N	N	N	II1	e0	-4.92	-4.65	0.27	0.0741417	-0.0169756	-0.0752922	0.623577	0.938931	0.654499	6.7733	6.84745	6.75633	6.69801
HSD52	uncharacterized LOC729467	729467	Ensembl:ENSG00000224609	-	NR_027120	TTCCACTAGGTGGGAAGCTTAGGGTAGTGGGAAGAACATGGATTCAGGAC	chr1	59597607	59612479	-	N	N	N	N	II1	e0	-4.25	-4.16	0.09	0.0448975	-0.0129857	-0.0325484	0.832528	0.959042	0.902151	6.69511	6.74001	6.68213	6.66256
FGGY	FGGY carbohydrate kinase domain containing	55277	HGNC:25610|MIM:611370|Ensembl:ENSG00000172456|HPRD:07721|Vega:OTTHUMG00000008424	-	NR_103473	CTCAGGACCTTGATGATCTTGCCATTCTCTACCTGGCCACAGTTCAAGCC	chr1	59762683	60165066	+	Y	Y	Y	Y	AMB1	e0	-2.39	-2.91	-0.52	0.0406576	-0.142572	-0.101813	0.831577	0.228998	0.487863	7.32504	7.36569	7.18246	7.22322
HOOK1	hook microtubule-tethering protein 1	51361	HGNC:19884|MIM:607820|Ensembl:ENSG00000134709|HPRD:07428|Vega:OTTHUMG00000008990	HK1	NM_015888	TCCAGAAACTGGGGATGGAATCTAGACTTGTGAGCGGCGGTGGTGCCTGC	chr1	60280532	60342050	+	Y	Y	N	N	PP1	e0	1.51	2.33	0.82	0.131208	0.0666824	0.103927	0.388627	0.739352	0.575801	6.6934	6.82461	6.76008	6.79733
CYP2J2	cytochrome P450, family 2, subfamily J, polypeptide 2	1573	HGNC:2634|MIM:601258|Ensembl:ENSG00000134716|HPRD:03159|Vega:OTTHUMG00000008991	CPJ2	NM_000775	AGACATGGCACGTGTTCTGAAACCACTGGTGTCTGCTCAGATGTGTTGGG	chr1	60358979	60392423	-	N	N	N	N	II1	e0	-1.49	-0.54	0.95	-0.0950065	-0.0632596	-0.0626365	0.481567	0.691905	0.729867	6.90091	6.8059	6.83765	6.83827
C1orf87	chromosome 1 open reading frame 87	127795	HGNC:28547|Ensembl:ENSG00000162598|HPRD:11338|Vega:OTTHUMG00000008992	-	NM_152377	GTTTCTCCCCAGCCTAAGTGTAGTGGCGGAGGCATTGTCAGAGTGGAGGC	chr1	60456065	60539442	-	Y	Y	Y	N	PI1	e0	1.41	0.88	-0.53	0.0751364	0.0768076	0.0246771	0.60295	0.598523	0.91546	6.7983	6.87344	6.87511	6.82298
NFIA	nuclear factor I/A	4774	HGNC:7784|MIM:600727|Ensembl:ENSG00000162599|HPRD:09007|Vega:OTTHUMG00000008618	CTF|NF-I/A|NF1-A|NFI-A|NFI-L	NM_001145512	ACATGGCCCGCAAGGACAATGAATCCACTCACATTGCAGAACAATTCCGA	chr1	61547533	61928460	+	Y	Y	Y	Y	AMB1	e2	-1.17	-1.66	-0.49	-0.530776	-0.510799	-0.439631	0.00172378	0.00233011	0.00775083	7.28284	6.75206	6.77204	6.8432
TM2D1	TM2 domain containing 1	83941	HGNC:24142|MIM:610080|Ensembl:ENSG00000162604|HPRD:16540	BBP	NM_032027	TAGGACTTCCTTTGAAAGCTGTATAATAGTGTTTCTCGGGCTTCTGTCTC	chr1	62146718	62191095	-	N	N	N	N	II1	e0	-3.98	-5.86	-1.88	-0.180242	-0.172189	-0.105193	0.370544	0.406633	0.711816	10.0065	9.82626	9.83431	9.90131
INADL	InaD-like (Drosophila)	10207	HGNC:28881|MIM:603199|Ensembl:ENSG00000132849|HPRD:04434|Vega:OTTHUMG00000008560	Cipp|InaD-like|PATJ|hINADL	NM_176877	AGGGACGTTCAGGGCTTGGTCTCAGCATTGTGGGAGGAAAAGACACACCC	chr1	62208148	62629591	+	Y	Y	Y	Y	AMB1	e0	-0.29	-1.2	-0.91	-0.061973	-0.122402	-0.09296	0.701487	0.321546	0.538801	6.90002	6.83804	6.77762	6.80706
L1TD1	LINE-1 type transposase domain containing 1	54596	HGNC:25595|Ensembl:ENSG00000240563|HPRD:07708|Vega:OTTHUMG00000008914	ECAT11|RP5-1155K23.3	NM_019079	CTTCTACCCAGAAGGATGGACAGCTAATAGCGTACTTGGGGATGAGGAGC	chr1	62660473	62678001	+	N	N	N	N	II1	e0	-4.78	-3.21	1.57	-0.0151843	-0.0121674	0.0237146	0.938736	0.952437	0.913306	6.78846	6.77328	6.77629	6.81217
KANK4	KN motif and ankyrin repeat domains 4	163782	HGNC:27263|MIM:614612|Ensembl:ENSG00000132854|HPRD:14109|Vega:OTTHUMG00000008971	ANKRD38|RP5-1155K23.5|dJ1078M7.1	NM_181712	GGTCCTGGGAGATGCTGATGCTATCGAGCCACAACCACACTTTGAGTAGC	chr1	62701836	62785083	-	N	N	N	N	II1	e0	-5.29	-2.94	2.35	-0.129981	-0.0877252	-0.137371	0.267972	0.531028	0.264107	6.82578	6.6958	6.73806	6.68841
USP1	ubiquitin specific peptidase 1	7398	HGNC:12607|MIM:603478|Ensembl:ENSG00000162607|HPRD:04593|Vega:OTTHUMG00000008972	UBP	NM_001017416	GTGCCTTGATTCACTTAGAAGTGTCTCAGAAAACCTGGACAGTTCGCTTC	chr1	62901974	62917475	+	N	N	N	N	II1	e2	-7.18	-6.69	0.49	-0.567295	-0.737184	-0.292774	0.026835	0.00530057	0.362174	10.029	9.46175	9.29186	9.73627
DOCK7	dedicator of cytokinesis 7	85440	HGNC:19190|Ensembl:ENSG00000116641|HPRD:16833|Vega:OTTHUMG00000013131	ZIR2	NM_033407	GGCAGTATTGCCTGTCACCTGCCACAGAGATTCCTTCAGTCGAATGAGCC	chr1	62920396	63154039	-	Y	Y	Y	Y	AMB1	e0	-0.94	-1.68	-0.74	-0.333382	-0.122892	0.0188147	0.00628142	0.397303	0.947205	8.54032	8.20694	8.41743	8.55913
ANGPTL3	angiopoietin-like 3	27329	HGNC:491|MIM:604774|Ensembl:ENSG00000132855|HPRD:10381|Vega:OTTHUMG00000009146	ANG-5|ANGPT5|ANL3|FHBL2	NM_014495	CTGTCCAGAGGGTTATTCAGGAGGCTGGTGGTGGCATGATGAGTGTGGAG	chr1	63063157	63071976	+	Y	N	Y	N	PI1	e0	1.82	-4.18	-6	-0.0830756	-0.194986	-0.174291	0.620314	0.115207	0.191626	6.97239	6.88932	6.77741	6.7981
ATG4C	autophagy related 4C, cysteine peptidase	84938	HGNC:16040|MIM:611339|Ensembl:ENSG00000125703|HPRD:07473|Vega:OTTHUMG00000009142	APG4-C|APG4C|AUTL1|AUTL3	NM_032852	GTCAGCATAAAGGATTTCCCTCTTGAGACATTCCACTGCCCTTCTCCCAA	chr1	63249776	63330941	+	N	Y	N	Y	IP1	e2	-1.81	-1.76	0.05	-0.505792	-0.560845	-0.421088	0.0032018	0.00150089	0.0128312	8.96936	8.46357	8.40852	8.54827
FOXD3	forkhead box D3	27022	HGNC:3804|MIM:611539|Ensembl:ENSG00000187140|HPRD:07018|Vega:OTTHUMG00000009141	AIS1|Genesis|HFH2|VAMAS2	NM_012183	TGTCGCTGAGCCGGACGACTGCCACCATCGCGCCCATTCTTAGCGTGCCA	chr1	63788729	63790797	+	N	N	N	N	II1	e0	-1.09	-3.51	-2.42	-0.0232862	-0.136132	-0.0488113	0.943843	0.519096	0.887752	6.73062	6.70733	6.59449	6.68181
ALG6	ALG6, alpha-1,3-glucosyltransferase	29929	HGNC:23157|MIM:604566|Ensembl:ENSG00000088035|HPRD:05194|Vega:OTTHUMG00000009140	CDG1C	NM_013339	GACGTTGATGACTGTCACACTGGATCCTCCTCAGAAACTACCGGACTTGT	chr1	63833260	63904233	+	N	N	N	N	II1	e0	-2.69	-2.5	0.19	0.0586141	-0.224751	-0.0484405	0.891479	0.400029	0.921689	9.08166	9.14027	8.85691	9.03322
ITGB3BP	integrin beta 3 binding protein (beta3-endonexin)	23421	HGNC:6157|MIM:605494|Ensembl:ENSG00000142856|HPRD:09267|Vega:OTTHUMG00000013364	CENP-R|CENPR|HSU37139|NRIF3|TAP20	NM_014288	CAGGACTTCCTCACAAAGCATCACGTCATCTTGACAGCTATGAATTCCTT	chr1	63906440	63988944	-	N	N	N	N	II1	e0	-3.75	-2.86	0.89	-0.382277	-0.287938	-0.1184	0.0108736	0.0565279	0.592365	8.00803	7.62575	7.72009	7.88963
EFCAB7	EF-hand calcium binding domain 7	84455	HGNC:29379|Ensembl:ENSG00000203965|HPRD:17226|Vega:OTTHUMG00000008983	RP4-534K7.1	NM_032437	CTACACTCTATGGGCTACAATAAAGCTCTGGAGTTGACAGAGGCATGTCC	chr1	63989012	64038364	+	N	N	N	N	II1	e0	-2.46	-2.48	-0.02	-0.156992	-0.0585094	0.0944251	0.167321	0.727256	0.534637	7.60112	7.44413	7.54261	7.69555
DLEU2L	deleted in lymphocytic leukemia 2-like	79469	HGNC:13225	BCMSUNL	NR_002771	AGTTGGACCCTTGTGTTTTGAAGAAATGCCAACTGCTTGAAGAATTTCCT	chr1	64014650	64016307	+	N	N	N	N	II1	e0	-2.27	0.53	2.8	0.0183891	-0.0787739	-0.00957694	0.940122	0.652536	0.973845	6.79034	6.80873	6.71157	6.78076
PGM1	phosphoglucomutase 1	5236	HGNC:8905|MIM:171900|Ensembl:ENSG00000079739|HPRD:01389|Vega:OTTHUMG00000008968	CDG1T|GSD14	NM_002633	GCCCTCCTGCATTGCTGCTGCGTGGGTATTTGTCTCCTTAGCCATCAGGT	chr1	64058946	64125916	+	N	N	N	N	II1	e0	-4.19	-3.36	0.83	-0.223614	-0.0655417	0.210876	0.128109	0.776919	0.181782	10.615	10.3914	10.5495	10.8259
ROR1	receptor tyrosine kinase-like orphan receptor 1	4919	HGNC:10256|MIM:602336|Ensembl:ENSG00000185483|HPRD:03821|Vega:OTTHUMG00000009022	NTRKR1|dJ537F10.1	NM_005012	AGCACTGGCCATGTGACTAGCTTGCCCTCATCAGGATCCAATCAGGAAGC	chr1	64239689	64647179	+	N	N	N	N	II1	e0	-2.12	-2.56	-0.44	0.280614	0.154667	0.0956682	0.0116093	0.195528	0.54285	6.68889	6.9695	6.84356	6.78456
UBE2U	ubiquitin-conjugating enzyme E2U (putative)	148581	HGNC:28559|Ensembl:ENSG00000177414|HPRD:14599|Vega:OTTHUMG00000009023	RP4-636O23.1	NM_152489	AGGCATTTGGGGACAAGTGTCAGACCCTCCGCTGCCTATCATGCACGGCA	chr1	64669489	64710027	+	N	N	N	N	II1	e0	-2.06	-3.1	-1.04	0.00305699	0.0352672	0.0599061	0.988989	0.852681	0.747611	6.67182	6.67488	6.70709	6.73173
CACHD1	cache domain containing 1	57685	HGNC:29314|Ensembl:ENSG00000158966|HPRD:13874|Vega:OTTHUMG00000009030	RP4-655E10.1	NM_020925	CACGGTTAAAAGCTGCTGCCAGTTAGCCAAGACATTATCCACCAAATTGC	chr1	64936475	65158741	+	N	N	N	N	II1	e0	-2.6	-3.02	-0.42	-0.0518527	-0.178726	-0.13603	0.793026	0.147452	0.348377	7.01141	6.95956	6.83269	6.87538
RAVER2	ribonucleoprotein, PTB-binding 2	55225	HGNC:25577|MIM:609953|Ensembl:ENSG00000162437|HPRD:11154|Vega:OTTHUMG00000009102	-	NM_018211	CAAAGGTGTCTGGACTACAGCACAGTGGACATGCCATCCATACTGGCCTG	chr1	65210777	65298914	+	N	N	N	N	II1	e2	-1.48	-2.27	-0.79	-0.414879	-0.67435	-0.388158	0.00694018	0.000150273	0.0124582	7.86536	7.45048	7.19101	7.47721
JAK1	Janus kinase 1	3716	HGNC:6190|MIM:147795|Ensembl:ENSG00000162434|HPRD:00992|Vega:OTTHUMG00000009310	JAK1A|JAK1B|JTK3	NM_002227	ATTGCCTCTGACGTCTGGTCTTTTGGAGTCACTCTGCATGAGCTGCTGAC	chr1	65298905	65432187	-	N	N	N	N	II1	e0	-3.6	-4.05	-0.45	-0.182598	0.17568	0.38805	0.529537	0.560116	0.097647	8.37711	8.19451	8.55279	8.76516
MIR101-1	microRNA 101-1	406893	HGNC:31488|MIM:612511|Ensembl:ENSG00000199135|miRBase:MI0000103	MIRN101-1	NR_029516	GCCCTGGCTCAGTTATCACAGTGCTGATGCTGTCTATTCTAAAGGTACAG	chr1	65524116	65524191	-	N	N	N	N	II1	e0	-6.18	-7.57	-1.39	-0.00754429	-0.0129716	0.04969	0.975853	0.957122	0.82393	6.73775	6.73021	6.72478	6.78744
AK4	adenylate kinase 4	205	HGNC:363|MIM:103030|Ensembl:ENSG00000162433|HPRD:00048|Vega:OTTHUMG00000009033	AK 4|AK3|AK3L1|AK3L2	NM_203464	CTGAGAGCGATGGGGCTATATTGAATCTCTGTATGCACTGAGAACTGAGC	chr1	65613231	65697828	+	N	N	N	N	II1	e0	-1.04	-2.12	-1.08	-0.128236	-0.0817558	0.333927	0.641172	0.797234	0.0990556	8.35538	8.22714	8.27362	8.6893
DNAJC6	DnaJ (Hsp40) homolog, subfamily C, member 6	9829	HGNC:15469|MIM:608375|Ensembl:ENSG00000116675|HPRD:16326|Vega:OTTHUMG00000009066	DJC6	NM_001256865	AAACGAATCTGTATGTTGAGGCAAAAGGATTGAACCTGGAAGTCTGGGAC	chr1	65730376	65881552	+	Y	Y	N	Y	IP1	e0	0.76	0.7	-0.06	0.0153633	0.188385	0.0563811	0.931281	0.0331333	0.695783	6.6863	6.70167	6.87469	6.74268
LEPROT	leptin receptor overlapping transcript	54741	HGNC:29477|MIM:613461|Ensembl:ENSG00000116678|Ensembl:ENSG00000213625|HPRD:13987|Vega:OTTHUMG00000009065|Vega:OTTHUMG00000009115	LEPR|OB-RGRP|OBRGRP|VPS55	NM_001198681	CCTAGAGCCTTATTAGAAATGCAGAATCTGAAGCCCCACTCTGGACCCAG	chr1	65886398	65901690	+	N	N	N	N	II1	e0	-4.24	-4.08	0.16	0.00170244	0.319242	0.360454	0.994119	0.00745008	0.00344889	8.37537	8.37707	8.69461	8.73582
LEPR	leptin receptor	3953	HGNC:6554|MIM:601007|Ensembl:ENSG00000116678|HPRD:03001|Vega:OTTHUMG00000009115	CD295|LEP-R|LEPRD|OB-R|OBR	NM_001198689	TGAATTGAGCTTTTTGCCCACAGATTCTTGATTTGTAGTTGTTTGGCAGG	chr1	65991371	66101111	+	Y	Y	N	N	PP1	e0	6.95	3.9	-3.05	-0.156584	-0.200236	-0.0902806	0.323207	0.172359	0.687294	7.06956	6.91297	6.86932	6.97928
PDE4B	phosphodiesterase 4B, cAMP-specific	5142	HGNC:8781|MIM:600127|Ensembl:ENSG00000184588|HPRD:02528|Vega:OTTHUMG00000009088	DPDE4|PDE4B5|PDEIVB	NM_001037339	TTCTTCTGAATGCTCCCGAACTACTGACTTTGAAGAGGTAGCCTCCTGCC	chr1	66797792	66840262	+	Y	Y	N	N	PP1	e0	2.64	1.1	-1.54	-0.135202	-0.0981995	0.0405432	0.120747	0.311003	0.797739	6.84907	6.71386	6.75087	6.88961
SGIP1	SH3-domain GRB2-like (endophilin) interacting protein 1	84251	HGNC:25412|MIM:611540|Ensembl:ENSG00000118473|HPRD:10910|Vega:OTTHUMG00000009161	-	NM_032291	ACTCTCAGTTGGCCCCCTACAGCAGTCTGGTGTTGAAGTTTCTTTGAACG	chr1	66999824	67210768	+	Y	Y	Y	N	PI1	e0	3.39	2.49	-0.9	-0.0256549	-0.0479137	-0.0286036	0.905782	0.788964	0.905582	6.67989	6.65424	6.63198	6.65129
TCTEX1D1	Tctex1 domain containing 1	200132	HGNC:26882|Ensembl:ENSG00000152760|HPRD:08287|Vega:OTTHUMG00000009162	RP11-266I14.2	NM_152665	AATGATGTTGTGGCGTTGTTCTTGGATGGTAAGTGGACTGCCTAGAGGAC	chr1	67218139	67244730	+	Y	Y	N	N	PP1	e0	1.6	0.65	-0.95	0.0338832	0.110737	0.0683939	0.837871	0.292859	0.630136	6.58156	6.61545	6.6923	6.64996
INSL5	insulin-like 5	10022	HGNC:6088|MIM:606413|Ensembl:ENSG00000172410|HPRD:08400|Vega:OTTHUMG00000009164	PRO182|UNQ156	NM_005478	GGGGAAGACCGTCTTTGGGGTGGACAGATGCCCACTGAAGAGCTTTGGAA	chr1	67263423	67266942	-	Y	Y	N	N	PP1	e0	6.46	6.53	0.07	0.0795005	-0.0874195	-0.0598037	0.635704	0.593999	0.781892	6.94323	7.02273	6.85581	6.88343
WDR78	WD repeat domain 78	79819	HGNC:26252|Ensembl:ENSG00000152763|HPRD:08017|Vega:OTTHUMG00000009165	DIC4	NM_207014	GGGCACTTTGGATTTAAAGAGCAAAAAAGAGGACTGGCTTGCTGCTGGTC	chr1	67303281	67390570	-	Y	Y	N	N	PP1	e0	3.66	1.35	-2.31	-0.0592206	-0.0232804	-0.087669	0.683741	0.899888	0.519338	6.75124	6.69202	6.72796	6.66358
MIER1	mesoderm induction early response 1, transcriptional regulator	57708	HGNC:29657|Ensembl:ENSG00000198160|HPRD:11362|Vega:OTTHUMG00000009194	ER1|MI-ER1	NM_001146112	CCCCAACTGCATCAAACAGTAGTAACAGCCAGTCTGAGAAAGAAGATGGC	chr1	67390577	67454302	+	N	N	N	N	II1	e0	-4.64	-4.87	-0.23	0.11845	0.0375124	0.0716691	0.561726	0.896304	0.802181	6.81175	6.9302	6.84927	6.88342
SLC35D1	solute carrier family 35 (UDP-GlcA/UDP-GalNAc transporter), member D1	23169	HGNC:20800|MIM:610804|Ensembl:ENSG00000116704|HPRD:15372|Vega:OTTHUMG00000009360	UGTREL7	NM_015139	GCCCACCCTGGCCATTGCGTATTTCACAGGAGATGCACAAAAGGCTGTGG	chr1	67465014	67520080	-	N	N	N	N	II1	e0	-2.79	-2.42	0.37	0.017768	0.0434944	0.0943617	0.944407	0.840055	0.613445	6.82474	6.84251	6.86823	6.9191
C1orf141	chromosome 1 open reading frame 141	400757	HGNC:32044|Ensembl:ENSG00000203963|HPRD:18418|Vega:OTTHUMG00000009406	-	NM_001276352	CAGGACCAAGAAAGGCATAGTCTGACTCTGGAAATGCGCTGTTGGAAGCC	chr1	67557858	67600654	-	Y	Y	Y	N	PI1	e0	4.43	0.31	-4.12	0.0318445	0.0287745	-0.114818	0.903409	0.909675	0.537364	6.84237	6.87421	6.87114	6.72755
IL23R	interleukin 23 receptor	149233	HGNC:19100|MIM:607562|Ensembl:ENSG00000162594|HPRD:16249|Vega:OTTHUMG00000009092	-	NM_144701	GCTTCATGGTCACACATACAGGCACAAAAACAGCATTATGTGGACGCCTC	chr1	67632168	67725650	+	Y	N	Y	N	PI1	e0	-0.37	-2.23	-1.86	0.0524862	0.018767	0.0557012	0.743148	0.926622	0.754658	6.61932	6.6718	6.63809	6.67502
IL12RB2	interleukin 12 receptor, beta 2	3595	HGNC:5972|MIM:601642|Ensembl:ENSG00000081985|HPRD:03383|Vega:OTTHUMG00000009094	-	NM_001258214	GCACCTGCTACACAGCAGGCTGTACACAGCAGATCAGTACTGTTCAACAG	chr1	67773046	67862583	+	N	N	N	N	II1	e0	-4.21	-4.5	-0.29	0.0418213	0.0966704	0.0221908	0.816762	0.45912	0.924088	6.71777	6.75959	6.81444	6.73996
SERBP1	SERPINE1 mRNA binding protein 1	26135	HGNC:17860|MIM:607378|Ensembl:ENSG00000142864|Vega:OTTHUMG00000009372	CHD3IP|HABP4L|PAI-RBP1|PAIRBP1	NM_015640	GTTCCTTTTGCTGCCCATTTGGGAGTATGTGGCAATTCCTAGTGCTCTTG	chr1	67873492	67896123	-	N	N	N	N	II1	e0	-5.97	-9.06	-3.09	0.239238	-0.139543	-0.142515	0.128558	0.469054	0.492162	9.51951	9.75875	9.37997	9.377
GADD45A	growth arrest and DNA-damage-inducible, alpha	1647	HGNC:4095|MIM:126335|Ensembl:ENSG00000116717|HPRD:00528|Vega:OTTHUMG00000009374	DDIT1|GADD45	NM_001924	CTGCACTGCGTGCTGGTGACGAATCCACATTCATCTCAATGGAAGGATCC	chr1	68150859	68154021	+	N	N	N	N	II1	e1	-9.8	-6.82	2.98	0.500855	0.103388	-0.0884294	0.000984922	0.598805	0.703475	7.96547	8.46632	8.06886	7.87704
GNG12	guanine nucleotide binding protein (G protein), gamma 12	55970	HGNC:19663|MIM:615405|Ensembl:ENSG00000172380|HPRD:13592|Vega:OTTHUMG00000009545	-	NM_018841	GCACTGCCCTTAGCCTTGTGTCATCTGCTTTTTCGTTCTGCGATATGCCC	chr1	68167148	68299155	-	N	Y	N	Y	IP1	e0	-1.28	-0.9	0.38	-0.0131653	0.0331614	-0.0209374	0.949695	0.852275	0.926057	6.61593	6.60276	6.64909	6.59499
DIRAS3	DIRAS family, GTP-binding RAS-like 3	9077	HGNC:687|MIM:605193|Ensembl:ENSG00000162595|HPRD:05547|Vega:OTTHUMG00000009544	ARHI|NOEY2	NM_004675	CCAGGAGCCCGAGAAGAAATCCCAGATGCCCAACACCACTGAGAAGCTGC	chr1	68511644	68516460	-	Y	Y	N	N	PP1	e0	0.96	1.68	0.72	0.126418	0.120583	0.098189	0.387585	0.423199	0.585162	6.78908	6.9155	6.90967	6.88727
WLS	wntless homolog (Drosophila)	79971	HGNC:30238|MIM:611514|Ensembl:ENSG00000116729|HPRD:10980|Vega:OTTHUMG00000009153	C1orf139|EVI|GPR177|MRP|mig-14	NM_001193334	TGAGATCTACAAGTTGACCCGCAAGGAGGCCCAGGAGTAGGAGGCTGCAG	chr1	68591040	68698229	-	Y	Y	N	Y	IP1	e0	2.63	1.25	-1.38	0.0795089	0.0128572	0.0590582	0.549859	0.951674	0.728822	6.66834	6.74785	6.6812	6.7274
MIR1262	microRNA 1262	100302279	HGNC:35328|miRBase:MI0006397	MIRN1262|hsa-mir-1262	NR_031664	TGGTGATGGGTGAATTTGTAGAAGGATGAAAGTCAAAGAATCCTTCTGGG	chr1	68649200	68649293	-	Y	Y	N	N	PP1	e0	1.43	5.02	3.59	-0.0655228	0.0313548	-0.00121168	0.684587	0.87467	0.996187	6.71114	6.64562	6.7425	6.70993
RPE65	retinal pigment epithelium-specific protein 65kDa	6121	HGNC:10294|MIM:180069|Ensembl:ENSG00000116745|HPRD:01569|Vega:OTTHUMG00000009208	LCA2|RP20|mRPE65|rd12|sRPE65	NM_000329	CCCGGGCTGAAGTGGAGATTAACATCCCTGTCACCTTTCATGGACTGTTC	chr1	68894506	68915642	-	Y	Y	N	N	PP1	e0	6.12	5.09	-1.03	-0.0799414	0.0634105	-0.0358155	0.505682	0.638214	0.848626	6.67992	6.59998	6.74333	6.64411
DEPDC1	DEP domain containing 1	55635	HGNC:22949|MIM:612002|Ensembl:ENSG00000024526|HPRD:10879|Vega:OTTHUMG00000009212	DEP.8|DEPDC1-V2|DEPDC1A|SDP35	NM_001114120	CACATTAGACTCACCCGAGGAATTTTAAAACAGCCTATATGCCCAGGGCC	chr1	68939834	68962904	-	Y	Y	N	N	PP1	e0	7.06	8.2	1.14	-0.205176	0.0209328	0.203638	0.0390269	0.914012	0.0467222	7.02201	6.81683	7.04294	7.22565
LRRC7	leucine rich repeat containing 7	57554	HGNC:18531|MIM:614453|Ensembl:ENSG00000033122|HPRD:09930|Vega:OTTHUMG00000059194	DENSIN	NM_020794	CGGAGCACGGAAGCACACACAAGCTCTTTATGAATTCTGCTCTCCATCAG	chr1	70225857	70589171	+	Y	Y	N	N	PP1	e0	6.23	6.46	0.23	-0.0410162	-0.0213375	-0.0505694	0.847464	0.928505	0.825153	6.79854	6.75752	6.7772	6.74797
PIN1P1	peptidylprolyl cis/trans isomerase, NIMA-interacting 1 pseudogene 1	5301	HGNC:8989|MIM:602051|HPRD:03630	PIN1L	NR_023916	CGCTTCTCTGTTCAGTAGCAAAAGCAAACACTCGTGGGCCCAGCTGTGGG	chr1	70385004	70386000	+	Y	Y	N	N	PP1	e0	10.4	3.33	-7.07	0.0923197	0.0561171	0.094159	0.470356	0.720133	0.498944	6.7131	6.80542	6.76922	6.80726
LRRC40	leucine rich repeat containing 40	55631	HGNC:26004|Ensembl:ENSG00000066557|HPRD:08622|Vega:OTTHUMG00000009348	dJ677H15.1	NM_017768	TGATGGACCTAGCCAAAGTGAGTCTGCTACTGAGACTGCCATGACACTAC	chr1	70610484	70671361	-	Y	N	Y	N	PI1	e0	0.77	-2.31	-3.08	-0.055774	-0.127649	0.0502783	0.866908	0.609619	0.896414	7.77896	7.72319	7.65131	7.82924
SRSF11	serine/arginine-rich splicing factor 11	9295	HGNC:10782|MIM:602010|Ensembl:ENSG00000116754|HPRD:03599|Vega:OTTHUMG00000009342	NET2|SFRS11|dJ677H15.2|p54	NM_004768	GCTCCGTGTTGGAAAAAAGGGGTAGTGCATTTTAAATTGACCTTCATACG	chr1	70671364	70717701	+	N	N	N	N	II1	e0	-7.46	-6.2	1.26	-0.175283	0.000804271	0.0342215	0.466503	0.997996	0.938865	7.87874	7.70346	7.87955	7.91296
ANKRD13C	ankyrin repeat domain 13C	81573	HGNC:25374|MIM:615125|Ensembl:ENSG00000118454|HPRD:13176|Vega:OTTHUMG00000009343	RP4-677H15.5|dJ677H15.3	NM_030816	TGACCCTAAGACCTGCGTATGTGAAGCAGCTATGAGTGCTGTGATTTGTT	chr1	70724684	70820417	-	N	N	N	N	II1	e0	-1.5	-2.41	-0.91	0.208862	0.052069	0.164768	0.12865	0.817854	0.299479	7.61557	7.82443	7.66764	7.78034
HHLA3	HERV-H LTR-associating 3	11147	HGNC:4906|MIM:604372|Ensembl:ENSG00000197568|HPRD:05083|Vega:OTTHUMG00000009346	-	NR_027404	ATCTGAGCCTCCCGCAGAGGAATGCAGAATGACGCCACGGCACGCAGGAT	chr1	70820492	70833705	+	N	N	N	N	II1	e0	-5.47	-4.53	0.94	-0.0788645	0.0432707	0.149013	0.691519	0.854932	0.371804	7.12493	7.04606	7.1682	7.27394
CTH	cystathionase (cystathionine gamma-lyase)	1491	HGNC:2501|MIM:607657|Ensembl:ENSG00000116761|HPRD:09633|Vega:OTTHUMG00000009352	-	NM_001190463	CACACTGATTCGACTTTCTGTGGGCTTAGAGGATGAGGAAGACCTACTGG	chr1	70876900	70905534	+	Y	Y	Y	N	PI1	e2	0.57	-2.24	-2.81	-0.731524	-0.455748	-0.459627	1.14208e-05	0.000858709	0.000877083	7.61366	6.88214	7.15791	7.15404
PTGER3	prostaglandin E receptor 3 (subtype EP3)	5733	HGNC:9595|MIM:176806|Ensembl:ENSG00000050628|HPRD:08906|Vega:OTTHUMG00000009399	EP3|EP3-I|EP3-II|EP3-III|EP3-IV|EP3e|PGE2-R	NM_001126044	GGAGGCCGGCAAGTTCAGGATCAGGGTGCCAGCAGATTCGGTGTCTGACT	chr1	71418114	71513491	-	Y	Y	N	N	PP1	e0	1.91	1.92	0.01	-0.0778901	-0.087252	-0.115706	0.583927	0.529182	0.380782	6.84269	6.7648	6.75544	6.72698
ZRANB2	zinc finger, RAN-binding domain containing 2	9406	HGNC:13058|MIM:604347|Ensembl:ENSG00000132485|HPRD:09185|Vega:OTTHUMG00000009660	ZIS|ZIS1|ZIS2|ZNF265	NM_005455	TTGTGCCTCAGACTTTTTGAAAGTCTACCTTCTAAATTGCCCCGACGATC	chr1	71528973	71546972	-	Y	Y	N	N	PP1	e0	-4.95	-5.22	-0.27	-0.223583	-0.0170415	-0.117956	0.203961	0.960968	0.640738	10.9856	10.762	10.9685	10.8676
MIR186	microRNA 186	406962	HGNC:31557|miRBase:MI0000483	MIRN186|miR-186	NR_029707	TCCAAAGAATTCTCCTTTTGGGCTTTCTGGTTTTATTTTAAGCCCAAAGG	chr1	71533313	71533399	-	N	N	N	N	II1	e0	-7.95	-8.8	-0.85	-0.049321	-0.021581	-0.172845	0.863927	0.946821	0.373412	6.90127	6.85195	6.87969	6.72843
NEGR1	neuronal growth regulator 1	257194	HGNC:17302|MIM:613173|Ensembl:ENSG00000172260|HPRD:14820|Vega:OTTHUMG00000009698	DMML2433|IGLON4|KILON|Ntra	NM_173808	GCCAGGCAGAGTGTAATTTCTTAACAGCTGGGTATAAAACAACGGGCACC	chr1	71868624	72748277	-	Y	Y	N	N	PP1	e0	6.56	5.83	-0.73	-0.0123527	-0.030307	0.00405883	0.949695	0.85693	0.986449	6.64127	6.62892	6.61097	6.64533
LRRIQ3	leucine-rich repeats and IQ motif containing 3	127255	HGNC:28318|Ensembl:ENSG00000162620|HPRD:14485|Vega:OTTHUMG00000009508	LRRC44	NM_001105659	GAAGACAGGGAAAAGACAGAGGAGAGAAGCAAGAGACAACCCATATAATT	chr1	74491701	74663871	-	Y	Y	N	N	PP1	e0	5.72	6.85	1.13	-0.00452646	-0.0429537	-0.0908358	0.98438	0.814258	0.558015	6.75352	6.749	6.71057	6.66269
FPGT	fucose-1-phosphate guanylyltransferase	8790	HGNC:3825|MIM:603609|Ensembl:ENSG00000254685|HPRD:06790|Vega:OTTHUMG00000009571	GFPP	NM_003838	ACTCTTCAGCACTTTCAGAGCTATTGATATGCATATGTCCACCTAGTACC	chr1	74663895	74674386	+	Y	Y	N	N	PP1	e0	2.91	2.65	-0.26	-0.0407425	0.00471199	0.00288378	0.838121	0.983823	0.99139	6.6861	6.64536	6.69081	6.68898
TNNI3K	TNNI3 interacting kinase	51086	HGNC:19661|MIM:613932|Ensembl:ENSG00000116783|HPRD:18208|Vega:OTTHUMG00000171318	CARK	NM_015978	CCCCGAACTGACAGCAACGATTCCAACCACGGCAAGCTGGCTTCCAACTA	chr1	74701070	75010116	+	Y	Y	N	N	PP1	e0	6.43	5.32	-1.11	0.0188544	0.0503956	0.0199573	0.920921	0.734716	0.925375	6.6784	6.69725	6.72879	6.69835
C1orf173	chromosome 1 open reading frame 173	127254	HGNC:25346|Ensembl:ENSG00000178965|HPRD:16816|Vega:OTTHUMG00000009622	RP11-653A5.1	NM_001002912	GCACGAAGTCCCTCTGCCCTACTCCCTATTCAAGGATATTACTCACTGCA	chr1	75033794	75139422	-	Y	Y	N	N	PP1	e0	5.25	5.99	0.74	-0.00294738	0.00876466	-0.0158585	0.987499	0.963731	0.939248	6.68265	6.6797	6.69141	6.66679
CRYZ	crystallin, zeta (quinone reductase)	1429	HGNC:2419|MIM:123691|Ensembl:ENSG00000116791|HPRD:00437|Vega:OTTHUMG00000009620	-	NM_001130043	CATTATTGGTTGGCTGCCAATGACCCCATATGTTCTGTGAGAATAGTAGC	chr1	75171171	75199092	-	Y	Y	Y	N	PI1	e0	0.5	-2.75	-3.25	-0.291309	-0.0289582	-0.00305751	0.0643335	0.926791	0.993622	9.92361	9.63231	9.89466	9.92056
TYW3	tRNA-yW synthesizing protein 3 homolog (S. cerevisiae)	127253	HGNC:24757|MIM:611245|Ensembl:ENSG00000162623|HPRD:14036|Vega:OTTHUMG00000009641	C1orf171	NM_001162916	AGGAAATTTGGGCAGGAAAGGGAACTCACAGTGTCGGAATGCCTGGAGCA	chr1	75198835	75232360	+	Y	Y	Y	N	PI1	e0	1.01	-2	-3.01	0.318024	0.179033	0.00626581	0.0386328	0.312433	0.987167	8.5322	8.85022	8.71123	8.53846
LHX8	LIM homeobox 8	431707	HGNC:28838|MIM:604425|Ensembl:ENSG00000162624|HPRD:17275|Vega:OTTHUMG00000009692	LHX7	NM_001256114	GGCTTATTCTGCCTACGTGCCCCAAGATGGAACGATGTTAACTGCGCTGC	chr1	75600566	75627218	+	Y	Y	N	N	PP1	e0	6.18	7.44	1.26	-0.0179909	0.0121793	-0.020975	0.925216	0.951756	0.921951	6.60843	6.59044	6.62061	6.58745
SLC44A5	solute carrier family 44, member 5	204962	HGNC:28524|Ensembl:ENSG00000137968|HPRD:14580|Vega:OTTHUMG00000009721	CTL5	NM_152697	CTGGCCTTCCTATTCTTCACACAAAGACTGCCAGTGATTGCACAAGGACC	chr1	75672074	76076799	-	Y	Y	N	N	PP1	e0	6.62	5.81	-0.81	-0.0388817	-0.0645517	-0.0630569	0.872561	0.75196	0.792549	6.80827	6.76939	6.74372	6.74521
ACADM	acyl-CoA dehydrogenase, C-4 to C-12 straight chain	34	HGNC:89|MIM:607008|Ensembl:ENSG00000117054|HPRD:08447|Vega:OTTHUMG00000009784	ACAD1|MCAD|MCADH	NM_001286043	GACTGTTGGTCTCTAGGTAGCCTTTGGTCTATTGTACACAATCTCATTTC	chr1	76190031	76229363	+	N	N	N	N	II1	e0	-3.17	-3.66	-0.49	-0.465315	-0.361082	-0.155826	0.00586613	0.0302266	0.490067	10.9908	10.5254	10.6297	10.8349
RABGGTB	Rab geranylgeranyltransferase, beta subunit	5876	HGNC:9796|MIM:179080|Ensembl:ENSG00000137955|HPRD:01532|Vega:OTTHUMG00000009786	GGTB	NM_004582	ACTCTAGGTTTCTACTTGATTTTTCCCCCATGTATACCTTTCATCTGTTC	chr1	76251878	76260775	+	N	N	N	N	II1	e2	-5.37	-9.57	-4.2	-0.0703459	-0.338151	-0.569569	0.837991	0.085734	0.00471617	9.29898	9.22863	8.96083	8.72941
SNORD45C	small nucleolar RNA, C/D box 45C	692085	HGNC:32720	U45C	NR_003042	CAATGATGAGTTGGCATGTATTCTGAATCTAAAGTTGATTATTACTACTT	chr1	76252756	76252834	+	N	N	N	N	II1	e0	-6.91	-10.07	-3.16	0.0219499	0.0777168	0.0919853	0.916394	0.593706	0.531157	6.75967	6.78162	6.83739	6.85165
SNORD45A	small nucleolar RNA, C/D box 45A	26805	HGNC:10184	RNU45A|U45a	NR_002749	GGTCAATGATGTGTTGGCATGTATTATCTGAATCTATTGCTGATGTGTAA	chr1	76253573	76253657	+	N	N	N	N	II1	e0	-6.91	-10.07	-3.16	-0.00163241	-0.0352073	0.0224437	0.993005	0.830498	0.915867	6.72518	6.72355	6.68998	6.74763
SNORD45B	small nucleolar RNA, C/D box 45B	26804	HGNC:10185	RNU45B|U45b	NR_002748	GGTCAATGATGTAATGGCATGTATTAGCTGAATCTAAAGTTGATGTGAGT	chr1	76255161	76255232	+	N	N	N	N	II1	e0	-5	-8.05	-3.05	-0.0682676	-0.0790784	-0.0940745	0.757855	0.704668	0.665751	6.77293	6.70466	6.69385	6.67886
MSH4	mutS homolog 4 (E. coli)	4438	HGNC:7327|MIM:602105|Ensembl:ENSG00000057468|HPRD:03658|Vega:OTTHUMG00000009788	-	NM_002440	GACAGAGAGCTGTGTACCATCTAGCCACTAGGCTTGTTCAAACTGCTCGA	chr1	76262555	76378923	+	Y	Y	N	N	PP1	e0	3.8	2.32	-1.48	-0.0165987	-0.0966604	-0.0284131	0.939101	0.47932	0.904752	6.91585	6.89925	6.81919	6.88744
ASB17	ankyrin repeat and SOCS box containing 17	127247	HGNC:19769|Ensembl:ENSG00000154007|HPRD:10671|Vega:OTTHUMG00000009787	Asb-17	NM_080868	GAGTAAGAGTAATGGTTGATCGTGAATTGGCTGACATCCATGAAGATGCC	chr1	76384557	76398116	-	Y	Y	N	N	PP1	e0	7.1	7.54	0.44	0.0554052	0.0381305	0.036715	0.716286	0.82157	0.855823	6.71771	6.77311	6.75584	6.75442
ST6GALNAC3	ST6 (alpha-N-acetyl-neuraminyl-2,3-beta-galactosyl-1,3)-N-acetylgalactosaminide alpha-2,6-sialyltransferase 3	256435	HGNC:19343|MIM:610133|HPRD:15341	PRO7177|SIAT7C|ST6GALNACIII|STY	NM_001160011	ACAAAAAGCATCACAAAGGATGGTCTTGGCCATATGCTAGGGCCCCTGTG	chr1	76540388	77042892	+	Y	Y	Y	N	PI1	e0	3.55	2.91	-0.64	0.094911	0.0296537	0.148235	0.485559	0.881003	0.224005	6.73857	6.83348	6.76822	6.8868
ST6GALNAC5	ST6 (alpha-N-acetyl-neuraminyl-2,3-beta-galactosyl-1,3)-N-acetylgalactosaminide alpha-2,6-sialyltransferase 5	81849	HGNC:19342|MIM:610134|HPRD:15342	SIAT7E|ST6GalNAcV	NM_030965	AGCAGGCTGAAACTATGGACATGATTTCTGAAGAGCACATCTCCACTGAC	chr1	77333185	77529737	+	Y	Y	N	N	PP1	e0	3.31	3.33	0.02	0.0404481	-0.0273022	0.0178383	0.837367	0.89561	0.945209	6.57048	6.61093	6.54318	6.58832
PIGK	phosphatidylinositol glycan anchor biosynthesis, class K	10026	HGNC:8965|MIM:605087|Ensembl:ENSG00000142892|HPRD:05474|Vega:OTTHUMG00000009686	GPI8	NM_005482	GCTGAAAGACTGGCATCCTCCTGGGGGCTTTATTCTGGGATTATGGGCAC	chr1	77554666	77685132	-	Y	Y	Y	N	PI1	e0	3.44	0.72	-2.72	-0.033355	-0.123164	-0.00648034	0.897736	0.452737	0.984348	8.70049	8.66713	8.57732	8.69401
AK5	adenylate kinase 5	26289	HGNC:365|MIM:608009|Ensembl:ENSG00000154027|HPRD:10472|Vega:OTTHUMG00000009796	AK6	NM_012093	GGGCCCTTTCCAGGAGTTTGCAAACCTTGTCATACCCATATGCAAAACTG	chr1	77748286	78025654	+	Y	Y	N	Y	IP1	e0	2.71	2.88	0.17	-0.107207	-0.196234	-0.158116	0.421292	0.077999	0.196929	6.95704	6.84983	6.7608	6.79892
ZZZ3	zinc finger, ZZ-type containing 3	26009	HGNC:24523|Ensembl:ENSG00000036549|HPRD:15907|Vega:OTTHUMG00000009652	ATAC1	NM_015534	GGAGGCAACTGTGGCATTGCTTCCTTAACCAGCTCATGGTGTGTGAATGT	chr1	78030189	78148343	-	N	N	N	N	II1	e1	-2.8	-2.33	0.47	0.638669	0.0911207	0.0500727	0.000381566	0.708053	0.88325	8.94762	9.58629	9.03874	8.9977
USP33	ubiquitin specific peptidase 33	23032	HGNC:20059|MIM:615146|Ensembl:ENSG00000077254|HPRD:10297|Vega:OTTHUMG00000009651	VDU1	NM_201624	TCGGCAAGCCCTCCTAAATCAGGCAATTTGTGGCCAGGATTGGCACCACC	chr1	78161673	78225564	-	N	N	N	N	II1	e0	-3.19	-3.93	-0.74	-0.209795	-0.105909	0.0350831	0.188391	0.618171	0.915867	7.19571	6.98591	7.0898	7.23079
FAM73A	family with sequence similarity 73, member A	374986	HGNC:24741|Ensembl:ENSG00000180488|HPRD:13415|Vega:OTTHUMG00000009766	-	NM_001270384	GAGGCCCAAGTGGGCAGATAACCTGAGGTCAGGAGTTTGAGACCAGCCTA	chr1	78245308	78345225	+	N	N	N	N	II1	e0	-3.04	-4.32	-1.28	0.403855	0.364432	0.208018	0.0282053	0.0503423	0.370157	8.99144	9.39529	9.35587	9.19945
NEXN-AS1	NEXN antisense RNA 1	374987	HGNC:31983|Ensembl:ENSG00000235927|HPRD:13542	C1orf118	NR_103535	CTGCAGGCGCGCAATGCCACGCCCGGCTCATTTTTTGTATTTTGGTGGAG	chr1	78347032	78355224	-	N	N	N	N	II1	e0	-3.6	-4.42	-0.82	-0.0587227	-0.0639272	-0.0442421	0.725931	0.692549	0.834032	6.71838	6.65965	6.65445	6.67413
NEXN	nexilin (F actin binding protein)	91624	HGNC:29557|MIM:613121|Ensembl:ENSG00000162614|HPRD:11388|Vega:OTTHUMG00000040533	CMH20|NELIN	NM_001172309	TCTGTGGCGGGGCCAAAAAAGGAAACCAGGAGTGCCACTATGCTGACTTC	chr1	78354199	78409578	+	N	N	N	N	II1	e0	-0.57	-1.99	-1.42	0.221968	-0.029218	-0.0257025	0.113621	0.911769	0.934557	7.02685	7.24882	6.99763	7.00115
FUBP1	far upstream element (FUSE) binding protein 1	8880	HGNC:4004|MIM:603444|Ensembl:ENSG00000162613|HPRD:10349|Vega:OTTHUMG00000040799	FBP|FUBP	NM_003902	CACTGGCATGTTTTTCCCCCCTTGCAGTATAGTGGTAGATTGGAGGATCT	chr1	78413590	78444777	-	N	N	N	N	II1	e0	-3.68	-5.08	-1.4	-0.00263085	0.00246291	-0.0666785	0.992033	0.991825	0.781877	7.47856	7.47593	7.48102	7.41188
DNAJB4	DnaJ (Hsp40) homolog, subfamily B, member 4	11080	HGNC:14886|MIM:611327|HPRD:07486	DNAJW|DjB4|HLJ1	NM_007034	CACCTTCTGAAATGCTGCTATAGGGCTGGTATCTGTAAAAGAATATCCTG	chr1	78470635	78482995	+	N	N	N	N	II1	e0	-2.45	-4.6	-2.15	-0.0313896	0.167101	0.0716544	0.91434	0.317472	0.790427	6.77899	6.7476	6.94609	6.85064
GIPC2	GIPC PDZ domain containing family, member 2	54810	HGNC:18177|HPRD:17040	SEMCAP-2|SEMCAP2	NM_017655	CCAAGCATCTTTGTAAAGTGTTAGATGGAAAATGCTGTGTGCTGCCATGG	chr1	78511588	78603112	+	Y	Y	Y	Y	AMB1	e0	3.34	0.18	-3.16	-0.0150611	-0.051381	-0.10073	0.934516	0.707867	0.373822	6.78276	6.7677	6.73138	6.68203
MGC27382	uncharacterized MGC27382	149047	Ensembl:ENSG00000237413	-	NR_027310	GACCCATGTTGCCAGTGAAACAGGAGGAGAAGGGACATCTGGGTGGAAAC	chr1	78695282	78835147	+	Y	Y	N	N	PP1	e0	4.27	4.46	0.19	0.132663	0.0179615	0.0449416	0.237036	0.931005	0.82027	6.84262	6.97528	6.86058	6.88756
PTGFR	prostaglandin F receptor (FP)	5737	HGNC:9600|MIM:600563|Ensembl:ENSG00000122420|HPRD:08988|Vega:OTTHUMG00000009644	FP	NM_000959	TTTGACTGGGGAGAGGCATGGAGAAGAAACTCTCATTCAGGGGCTCCAGG	chr1	78956727	79006386	+	Y	Y	N	N	PP1	e0	4.68	6	1.32	0.0813672	-0.0504782	0.0334092	0.510695	0.736889	0.866988	6.87389	6.95526	6.82341	6.9073
IFI44L	interferon-induced protein 44-like	10964	HGNC:17817|MIM:613975|HPRD:13728	C1orf29	NM_006820	GTGGGCTAAGATAGGTCCTACTGCAAACCACCCCTCCATATTTCCGTACC	chr1	79086087	79111830	+	Y	Y	N	Y	IP1	e0	0.63	4.4	3.77	-0.00460889	0.0608959	0.0135464	0.986424	0.766144	0.965291	6.72904	6.72443	6.78994	6.74259
IFI44	interferon-induced protein 44	10561	HGNC:16938|MIM:610468|Ensembl:ENSG00000137965|HPRD:09998|Vega:OTTHUMG00000009723	MTAP44|TLDC5|p44	NM_006417	GCTCTGAGACGAATGCTATGGGCTGCAGATGACTTCTTAGAGGATTTGCC	chr1	79115476	79129763	+	Y	Y	N	N	PP1	e0	3.28	1.6	-1.68	0.133686	0.0996025	0.0850686	0.269438	0.46781	0.598184	7.48794	7.62162	7.58754	7.57301
ELTD1	EGF, latrophilin and seven transmembrane domain containing 1	64123	HGNC:20822|Ensembl:ENSG00000162618|Vega:OTTHUMG00000009738	ETL|KPG_003	NM_022159	CTTTGGCTATCTAAGCCCAGCCGTGGTAGTTGGATTTTCGGCAGCACTAG	chr1	79355448	79472495	-	Y	Y	N	N	PP1	e0	6.14	8.02	1.88	-0.0421837	-0.0756123	0.0341501	0.845467	0.669129	0.89547	6.77928	6.73709	6.70367	6.81343
LPHN2	latrophilin 2	23266	HGNC:18582|MIM:607018|Ensembl:ENSG00000117114|HPRD:06116|Vega:OTTHUMG00000009844	CIRL2|CL2|LEC1|LPHH1	NM_012302	GTGTGTCACCCCTGTTTATTCTTGAACAGAGGGCAAAGAGGGCACTGGGC	chr1	82266081	82458107	+	Y	Y	N	N	PP1	e0	6.88	6.09	-0.79	0.00967678	0.0372691	-0.00681995	0.965359	0.827007	0.97798	6.69288	6.70255	6.73015	6.68606
TTLL7	tubulin tyrosine ligase-like family, member 7	79739	HGNC:26242|HPRD:08013	RP5-836J3.2	NM_024686	ATAAAAGCCCGGAGGTGGTGACTCCTTTGCAGCTCCAGTGTTGCCAGCGC	chr1	84335056	84464833	-	Y	Y	N	N	PP1	e0	4.42	3.6	-0.82	-0.00441056	0.0257673	-0.0373944	0.982057	0.88209	0.840144	6.68853	6.68412	6.7143	6.65114
PRKACB	protein kinase, cAMP-dependent, catalytic, beta	5567	HGNC:9381|MIM:176892|Ensembl:ENSG00000142875|HPRD:01482|Vega:OTTHUMG00000009975	PKACB	NM_001242857	CCATGCACGGTTCTATGCAGCTCAGATAGTGCTAACATTCGAGTACCTCC	chr1	84630064	84704181	+	Y	Y	N	Y	IP1	e0	0.92	1.42	0.5	-0.200982	-0.348102	-0.263715	0.0901123	0.00394349	0.026588	7.41821	7.21723	7.07011	7.15449
SAMD13	sterile alpha motif domain containing 13	148418	HGNC:24582|Ensembl:ENSG00000203943|HPRD:17302|Vega:OTTHUMG00000009859	RP11-376N17.1	NM_001134664	GCATCATGGCCCCTTCAGGAGCAGAATCATAGCTCTGAAAAGAGAAGCTC	chr1	84768333	84816481	+	Y	Y	N	N	PP1	e0	0.28	-0.48	-0.76	-0.240241	-0.258348	-0.241998	0.0366164	0.0260477	0.0405688	7.07783	6.83759	6.81949	6.83584
UOX	urate oxidase, pseudogene	391051	HGNC:12575|MIM:191540	UOXP|URICASE	NR_003927	CAAGACTGTGACATTGTGGCCACCAATAGGAGTCCACTCTCAGCTGAGGA	chr1	84830640	84863576	-	Y	Y	N	N	PP1	e0	0.79	-0.08	-0.87	0.0566075	-0.0205945	0.0646607	0.765293	0.930708	0.752427	6.69391	6.75052	6.67332	6.75858
DNASE2B	deoxyribonuclease II beta	58511	HGNC:28875|MIM:608057|Ensembl:ENSG00000137976|HPRD:09728|Vega:OTTHUMG00000009860	DLAD	NM_021233	GTACCTGTACCTAGACTCTACAACTAGAAGCTGGAGGAAGAGTGAGCAAC	chr1	84864214	84880691	+	Y	Y	N	N	PP1	e0	-0.1	-0.95	-0.85	0.0266535	0.108703	0.0240123	0.89862	0.393438	0.918823	6.59659	6.62325	6.7053	6.62061
RPF1	ribosome production factor 1 homolog (S. cerevisiae)	80135	HGNC:30350|HPRD:15272	BXDC5|RP11-118B23.1	NM_025065	GGAGAGTATGAATGGGTCCATAAGCCCCGGGAAATGGATACAAGTAGAAG	chr1	84944919	84964033	+	N	N	N	N	II1	e0	-4.62	-6.72	-2.1	-0.0766981	-0.250111	-0.235778	0.78868	0.167449	0.226115	9.12089	9.04419	8.87078	8.88511
GNG5	guanine nucleotide binding protein (G protein), gamma 5	2787	HGNC:4408|MIM:600874|Ensembl:ENSG00000174021|HPRD:11865|Vega:OTTHUMG00000009858	-	NM_005274	GCCGCTATGAAGAAAGTGGTTCAACAGCTCCGGCTGGAGGCCGGACTCAA	chr1	84964005	84972262	-	N	N	N	N	II1	e0	-7.75	-8.24	-0.49	-0.297367	-0.292769	-0.291137	0.530627	0.548893	0.584353	9.37352	9.07615	9.08075	9.08238
CTBS	chitobiase, di-N-acetyl-	1486	HGNC:2496|MIM:600873|Ensembl:ENSG00000117151|HPRD:02927|Vega:OTTHUMG00000009922	CTB	NM_004388	CGGGGCATTGGCATGTGGAATGCAAACTGTCTTGACTACTCTGGAGATGC	chr1	85018803	85040163	-	N	N	N	N	II1	e0	-2.31	-6.36	-4.05	0.0746063	0.178313	0.214165	0.751806	0.284326	0.193618	7.93459	8.0092	8.1129	8.14876
C1orf180	chromosome 1 open reading frame 180	439927	HGNC:26647|Ensembl:ENSG00000180869|HPRD:08182|Vega:OTTHUMG00000009923	-	NR_027379	CTGCAGGAAGTCCAAGGTCCTTTGCATGGCAGTCTTATCCCCAAATGGCA	chr1	85093912	85100703	-	N	N	N	N	II1	e0	-0.75	-3.74	-2.99	-0.0700074	0.0762866	0.0574645	0.665565	0.63037	0.774325	6.84751	6.77751	6.9238	6.90498
SSX2IP	synovial sarcoma, X breakpoint 2 interacting protein	117178	HGNC:16509|MIM:608690|Ensembl:ENSG00000117155|HPRD:10566|Vega:OTTHUMG00000009926	ADIP	NM_001166417	CAGTCTGTTCATAAAACATGGACTGATGGGTCTGCTCCAGGCCACATTTG	chr1	85109389	85156151	-	N	N	N	N	II1	e0	-4.15	-4.03	0.12	0.0214055	-0.073137	-0.0795703	0.911744	0.582361	0.567977	7.19563	7.21704	7.1225	7.11606
LPAR3	lysophosphatidic acid receptor 3	23566	HGNC:14298|MIM:605106|Ensembl:ENSG00000171517|HPRD:05486	EDG7|Edg-7|GPCR|HOFNH30|LP-A3|LPA3|RP4-678I3	NM_012152	GCTGCATTTAGAGAAAGCACAGAAACGGGAGAGGTTCGGCGGGTCCCTGC	chr1	85279085	85358896	-	Y	Y	Y	N	PI1	e0	0.57	-1.85	-2.42	0.0523636	0.0498016	0.0244329	0.816923	0.822856	0.934662	6.8586	6.91096	6.9084	6.88303
MCOLN2	mucolipin 2	255231	HGNC:13357|MIM:607399|Ensembl:ENSG00000153898|HPRD:09584|Vega:OTTHUMG00000009954	TRP-ML2|TRPML2	NM_153259	AAGACCTCATGCTCATGCAGTGGACATTTCTTGGCCTGTTTTCCTGTGGG	chr1	85391265	85462796	-	N	N	N	N	II1	e0	-1.84	-1.37	0.47	-0.127688	0.0990477	0.49515	0.608373	0.71999	0.00752213	8.47022	8.34254	8.56927	8.96537
MCOLN3	mucolipin 3	55283	HGNC:13358|MIM:607400|Ensembl:ENSG00000055732|HPRD:09585|Vega:OTTHUMG00000009955	TRP-ML3|TRPML3	NM_018298	GCCTACTACACACCTAGGCTATTTGGTATAGCCTGTTGGTCCTGGGGTAC	chr1	85483764	85514223	-	Y	N	Y	N	PI1	e0	0.75	-0.4	-1.15	-0.042812	0.0445743	-0.00892639	0.807078	0.791955	0.971684	6.84411	6.8013	6.88868	6.83518
WDR63	WD repeat domain 63	126820	HGNC:30711|Ensembl:ENSG00000162643|HPRD:11409|Vega:OTTHUMG00000009953	DIC3|NYD-SP29|RP11-507C22.2	NM_145172	TCAACCTTGGCCTAATCAAAGTCACAGAGAAGGGGTCATACATGGAGGTG	chr1	85527980	85598821	+	Y	Y	Y	N	PI1	e0	1.67	-0.52	-2.19	0.219256	0.107749	0.10771	0.117128	0.559323	0.591854	6.6921	6.91135	6.79985	6.79981
SYDE2	synapse defective 1, Rho GTPase, homolog 2 (C. elegans)	84144	HGNC:25841|Ensembl:ENSG00000097096|Vega:OTTHUMG00000009956	RP11-33E12.1	NM_032184	GACAGTCCACTTAGCAATCGTTATGCAGGAGACTGGAGCAGCTGTGGGGA	chr1	85623355	85666728	-	Y	N	Y	N	PI1	e0	-2.02	-3.41	-1.39	0.0424445	-0.0331467	-0.013673	0.820835	0.864422	0.958265	6.9332	6.97564	6.90005	6.91952
C1orf52	chromosome 1 open reading frame 52	148423	HGNC:24871|HPRD:16637	RP11-234D19.1|gm117	NM_198077	AGAGTGCCTCCTGTGTTCCAGGTGCTTTGTGCATATATTTTCTCTGATCC	chr1	85715636	85725355	-	N	N	N	N	II1	e1	-6.6	-8.92	-2.32	0.519034	0.311374	0.432882	0.00397677	0.080939	0.0153826	9.11116	9.6302	9.42254	9.54405
BCL10	B-cell CLL/lymphoma 10	8915	HGNC:989|MIM:603517|Ensembl:ENSG00000142867|HPRD:04625|Vega:OTTHUMG00000009965	CARMEN|CIPER|CLAP|c-E10|mE10	NM_003921	GCCACGCCTGCGCAGGTCGTCGGGGGAGACTGATGAAGAGACGACTATCC	chr1	85731459	85742587	-	N	N	N	N	II1	e0	-6.84	-10.93	-4.09	0.126954	0.0449487	0.12843	0.579806	0.886394	0.614678	7.03715	7.16411	7.0821	7.16558
LOC646626	uncharacterized LOC646626	646626	-	-	NR_045484	GAATGTCCACTATGTGCCAGACACTGTTCTAGGTGCTAGGAAAACAGCTG	chr1	85742040	85743771	+	N	N	N	N	II1	e0	-10.44	-13.35	-2.91	0.101026	0.148535	0.163226	0.488075	0.239411	0.205198	6.7156	6.81662	6.86413	6.87882
DDAH1	dimethylarginine dimethylaminohydrolase 1	23576	HGNC:2715|MIM:604743|Ensembl:ENSG00000153904|HPRD:09203|Vega:OTTHUMG00000010578	DDAH	NM_001134445	TCAGCTACTCTGAACAGATTACTAAGGCCATCTCCTCATCTCTAAGGGAG	chr1	85784167	86044046	-	Y	Y	Y	N	PI1	e0	3.34	2.15	-1.19	-0.0453457	-0.05968	-0.0425912	0.824368	0.74522	0.858514	6.8176	6.77225	6.75792	6.775
CYR61	cysteine-rich, angiogenic inducer, 61	3491	HGNC:2654|MIM:602369|Ensembl:ENSG00000142871|HPRD:09089|Vega:OTTHUMG00000010577	CCN1|GIG1|IGFBP10	NM_001554	GAAACTGCCAAGGGTGCTGGTGCGGATGGACACTAATGCAGCCACGATTG	chr1	86046443	86049648	+	N	N	N	N	II1	e0	-1.4	-0.56	0.84	0.015463	0.0808954	0.00308853	0.941763	0.56676	0.990303	6.63913	6.65459	6.72002	6.64221
ZNHIT6	zinc finger, HIT-type containing 6	54680	HGNC:26089|Ensembl:ENSG00000117174|HPRD:08630	BCD1|C1orf181|NY-BR-75	NM_001170670	GTACAACGCACCGTCTAGCCACAGGAGAACTAATCTTCTATCAGTTGCCC	chr1	86115105	86174116	-	Y	Y	N	N	PP1	e1	-0.45	-1.41	-0.96	0.750295	0.454488	0.364387	6.38874e-06	0.000653042	0.00416255	8.75017	9.50046	9.20466	9.11455
COL24A1	collagen, type XXIV, alpha 1	255631	HGNC:20821|MIM:610025|Ensembl:ENSG00000171502|HPRD:10846|Vega:OTTHUMG00000010629	-	NM_152890	GCCGGTGATACACTACCTCTTACGTGTTGCCTCTTTGTGTTGCTTGGTGC	chr1	86194915	86622121	-	Y	Y	N	N	PP1	e0	6.3	4.76	-1.54	0.0724729	-0.03333	0.0714273	0.540896	0.829193	0.59012	6.83311	6.90558	6.79978	6.90454
ODF2L	outer dense fiber of sperm tails 2-like	57489	HGNC:29225|Ensembl:ENSG00000122417|HPRD:11134|Vega:OTTHUMG00000010080	RP5-977L11.1|dJ977L11.1	NM_001184765	GACTGAATTGGAAGCAACACTTAAGGAAGCGGAGTTGGTAACTCATTCTG	chr1	86812506	86862025	-	Y	Y	Y	N	PI1	e0	2.39	0.35	-2.04	-0.0571557	0.0233471	0.0248627	0.759581	0.917221	0.923565	6.66743	6.61027	6.69078	6.69229
CLCA2	chloride channel accessory 2	9635	HGNC:2016|MIM:604003|Ensembl:ENSG00000137975|HPRD:04923|Vega:OTTHUMG00000010256	CACC|CACC3|CLCRG2|CaCC-3	NM_006536	AGAAGAGGTCAGCAGGGAGATACTAACCTTTGGAAATGATTAGCTGGCTC	chr1	86889768	86922240	+	Y	Y	Y	N	PI1	e0	1.67	0.64	-1.03	-0.173557	0.0207549	-0.110167	0.102148	0.918488	0.409197	6.62742	6.45386	6.64817	6.51725
CLCA1	chloride channel accessory 1	1179	HGNC:2015|MIM:603906|Ensembl:ENSG00000016490|HPRD:04880|Vega:OTTHUMG00000010254	CACC|CACC1|CLCRG1|CaCC-1|GOB5|hCLCA1|hCaCC-1	NM_001285	ATTATGTGGAAGTGGATAGGAGAACTGCAGCTGTCAATAGCCTAGGGCTG	chr1	86934525	86965974	+	Y	Y	N	N	PP1	e0	-0.27	0.91	1.18	0.0711151	0.0545683	0.281177	0.61778	0.731492	0.00752437	6.78728	6.8584	6.84185	7.06846
CLCA4	chloride channel accessory 4	22802	HGNC:2018|Ensembl:ENSG00000016602|HPRD:16719|Vega:OTTHUMG00000010260	CaCC|CaCC2	NR_024602	AGCAAATCCTGATGACATTGATCCTACTCCTACTCCTACTCCTACTCCTG	chr1	87012758	87046432	+	Y	Y	N	N	PP1	e0	5.02	6.01	0.99	-0.0611929	-0.138717	-0.127903	0.669721	0.184287	0.26148	6.89014	6.82895	6.75142	6.76224
CLCA3P	chloride channel accessory 3, pseudogene	9629	HGNC:2017|MIM:604337|Ensembl:ENSG00000153923|HPRD:05065	CLCA3	NR_024604	GCAACTAACTTTATTCCTCCACAGGAACCCAGCATTCCTGATCTGGGTAC	chr1	87099958	87121059	+	Y	Y	N	N	PP1	e0	4.77	2.28	-2.49	-0.024995	0.00802657	0.0135014	0.904646	0.970403	0.95824	6.58873	6.56374	6.59676	6.60223
SH3GLB1	SH3-domain GRB2-like endophilin B1	51100	HGNC:10833|MIM:609287|Ensembl:ENSG00000097033|HPRD:15333|Vega:OTTHUMG00000010257	Bif-1|PPP1R70|dJ612B15.2	NM_016009	GGCTTCAACAAGTGGCCTAGTAATCACCTCTCCTTCCAACCTCAGTGACC	chr1	87170252	87213867	+	N	N	N	N	II1	e0	-2.2	-3.5	-1.3	0.0809576	0.383628	0.40469	0.554716	0.000675931	0.000468807	9.31499	9.39595	9.69862	9.71968
42248	15 kDa selenoprotein	9403	MIM:606254|Ensembl:ENSG00000183291|HPRD:09376|Vega:OTTHUMG00000008520	-	NM_004261	GCCTCATGTGCTGTGTGCTCTTTGAAAGGAATGACAGCAGACTACAAAGC	chr1	87328127	87380107	-	N	N	N	N	II1	e0	-4.97	-5.88	-0.91	-0.331392	-0.289645	-0.226392	0.164723	0.249	0.451526	10.7795	10.4481	10.4898	10.5531
HS2ST1	heparan sulfate 2-O-sulfotransferase 1	9653	HGNC:5193|MIM:604844|Ensembl:ENSG00000153936|HPRD:09215|Vega:OTTHUMG00000010255	dJ604K5.2	NM_001134492	ACTTGCAGTGGCTGAACAAAGAGCATGGCTTGAGAATCAAAGGGATCTGC	chr1	87380334	87564125	+	N	N	N	N	II1	e0	-3.93	-4.72	-0.79	-0.065199	-0.100607	-0.097067	0.798391	0.644822	0.693449	7.4784	7.4132	7.37779	7.38133
LINC01140	uncharacterized LOC339524	339524	Ensembl:ENSG00000267272|HPRD:14169	-	NR_026989	TAAGGACTGTCTGTGACAGTGAGCCCGAGATGACTGGGCTCTGTGCTCCC	chr1	87595447	87634886	+	Y	Y	N	N	PP1	e0	-2.01	-1.08	0.93	0.0497164	0.0772758	0.068804	0.774841	0.602014	0.689848	6.81999	6.86971	6.89727	6.88879
LMO4	LIM domain only 4	8543	HGNC:6644|MIM:603129|Ensembl:ENSG00000143013|HPRD:09122|Vega:OTTHUMG00000010248	-	NM_006769	CTACCCTCATTAACAATTAGCAGGGCACTGGCCAGAGTTTGTACCCTGTG	chr1	87794150	87814607	+	N	N	N	N	II1	e2	-5.43	-5.98	-0.55	-1.08298	-0.912191	-0.684075	3.47098e-06	1.86919e-05	0.000295582	9.23866	8.15568	8.32647	8.55459
PKN2	protein kinase N2	5586	HGNC:9406|MIM:602549|Ensembl:ENSG00000065243|HPRD:03972|Vega:OTTHUMG00000010074	PAK2|PRK2|PRKCL2|PRO2042|Pak-2	NM_006256	CCACCTCGAGAACCAAGGATACTTTCGGAAGAGGAGCAGGAAATGTTCAG	chr1	89149921	89301938	+	N	N	N	N	II1	e0	-2.25	-3.9	-1.65	0.0312123	-0.0496502	-0.0204313	0.944347	0.904045	0.969283	7.50773	7.53894	7.45808	7.4873
GTF2B	general transcription factor IIB	2959	HGNC:4648|MIM:189963|Ensembl:ENSG00000137947|HPRD:08928|Vega:OTTHUMG00000010611	TF2B|TFIIB	NM_001514	CATCTCTGTGGCAGCGGCAGCTATTTACATGGCCTCACAGGCATCAGCTG	chr1	89318320	89357301	-	N	N	N	N	II1	e0	-4.97	-6.43	-1.46	0.234158	0.30007	0.158842	0.0629423	0.0174312	0.284623	9.13851	9.37267	9.43858	9.29736
CCBL2	cysteine conjugate-beta lyase 2	56267	HGNC:33238|MIM:610656|Ensembl:ENSG00000137944|HPRD:13752|Vega:OTTHUMG00000010617	KAT3|KATIII|RP4-531M19.2	NM_001008662	TGGCCCAGAGGAGCCTCTGCTCTCTTAGCGGTAGAGCAAAATTCCTGAAG	chr1	89401455	89458643	-	N	N	N	N	II1	e0	-3.54	-4.33	-0.79	-0.123079	-0.132029	-0.0632161	0.331575	0.28931	0.737478	7.37178	7.2487	7.23975	7.30857
RBMXL1	RNA binding motif protein, X-linked-like 1	494115	HGNC:25073|Ensembl:ENSG00000213516|HPRD:17417|Vega:OTTHUMG00000010661	RBM1	NM_019610	CTCCCCGTCTTGGAAACAAGTTTTAGTTTATTGCTTTGGAGACTAGAGCC	chr1	89445138	89458643	-	N	N	N	N	II1	e0	-6.6	-9.17	-2.57	0.0581186	0.0806372	0.114037	0.730029	0.590703	0.410388	7.07624	7.13436	7.15688	7.19028
GBP3	guanylate binding protein 3	2635	HGNC:4184|MIM:600413|Ensembl:ENSG00000117226|HPRD:02683|Vega:OTTHUMG00000010616	-	NM_018284	CCTGATTCTTAAAGGTCATACTTGAAATCCTGCCAATTTTCCCCAAAGGG	chr1	89472359	89488549	-	N	N	N	N	II1	e0	-4.05	-5.13	-1.08	-0.054657	0.015113	0.0146987	0.720738	0.940845	0.950191	6.83945	6.78479	6.85456	6.85415
GBP1	guanylate binding protein 1, interferon-inducible	2633	HGNC:4182|MIM:600411|Ensembl:ENSG00000117228|HPRD:02681|Vega:OTTHUMG00000010614	-	NM_002053	GTTCTCCAGAGGAAGGTGGAAGAAACCATGGGCAGGAGTAGGAATTGAGT	chr1	89517986	89531043	-	Y	N	Y	N	PI1	e1	-1.03	-2.83	-1.8	1.41241	1.90958	1.65378	9.70485e-07	3.8425e-08	1.70541e-07	8.36367	9.77608	10.2732	10.0175
GBP2	guanylate binding protein 2, interferon-inducible	2634	HGNC:4183|MIM:600412|Ensembl:ENSG00000162645|HPRD:02682|Vega:OTTHUMG00000010662	-	NM_004120	GCCTGTCCAGCTCCCTCTCCCCAAGAAACAACATGAATGAGCAACTTCAG	chr1	89571815	89591842	-	Y	N	Y	N	PI1	e1	3.03	-3.9	-6.93	1.53698	3.51619	3.99836	6.89577e-09	1.3043e-12	2.45352e-13	6.83836	8.37534	10.3545	10.8367
GBP7	guanylate binding protein 7	388646	HGNC:29606|MIM:612468|Ensembl:ENSG00000213512|HPRD:13432|Vega:OTTHUMG00000010659	GBP4L	NM_207398	TAAGCAGGCTAAGAAGGAGGCAGCTGAAAAGGAACAGGAGCTGCTAAGAC	chr1	89597433	89641723	-	Y	Y	Y	N	PI1	e0	4.22	0.89	-3.33	-0.00274081	-0.00420654	0.00512891	0.989959	0.984672	0.984732	6.75147	6.74873	6.74727	6.7566
GBP4	guanylate binding protein 4	115361	HGNC:20480|MIM:612466|Ensembl:ENSG00000162654|HPRD:13570|Vega:OTTHUMG00000010663	Mpa2	NM_052941	CCATGGGCCTTTTCACAGGGGACACAGGCTTCTTAAAACAACCCGGCTTC	chr1	89646830	89664633	-	Y	Y	Y	N	PI1	e1	5.47	-1.29	-6.76	0.078831	0.895486	0.489269	0.681108	2.06777e-06	0.000652601	6.86119	6.94003	7.75668	7.35046
GBP5	guanylate binding protein 5	115362	HGNC:19895|MIM:611467|Ensembl:ENSG00000154451|HPRD:13571	GBP-5	NM_052942	GCAGGAACAACAGATGCAGGAACAGGCTGCACAGCTCAGCACAACATTCC	chr1	89724633	89738544	-	N	N	N	N	II1	e1	-1.62	-6.62	-5	0.204554	0.875382	0.864757	0.110364	1.88157e-06	2.13688e-06	6.70462	6.90917	7.58	7.56937
LOC729930	chromosome 11 open reading frame 74 pseudogene	729930	-	-	NR_077244	TCTCAGCCTATCCAGATAGCATGCTCTGGACACAGTGACAAGGGGGTGGC	chr1	89754940	89756045	-	N	N	N	N	II1	e0	1.41	-7.68	-9.09	0.0626424	0.0276904	0.0422214	0.795095	0.922412	0.890938	6.75956	6.8222	6.78725	6.80178
GBP6	guanylate binding protein family, member 6	163351	HGNC:25395|MIM:612467|HPRD:13572	-	NM_198460	GGCTCCTTCTGGGAAGAACCAAGTGAATGTAGGGGTTGAAGGAATACATA	chr1	89829435	89853719	+	Y	Y	Y	N	PI1	e0	3.75	-0.46	-4.21	-0.0249192	-0.00840309	0.0663869	0.910884	0.97071	0.723556	6.70208	6.67716	6.69368	6.76847
GBP1P1	guanylate binding protein 1, interferon-inducible pseudogene 1	400759	HGNC:39561|Ensembl:ENSG00000225492	-	NR_003133	CAACCAAGGACATGTACCATAAACTAAAGACCAGAGCCTTCCTGTCACCC	chr1	89873237	89890493	+	Y	Y	Y	N	PI1	e0	3	1.77	-1.23	0.149332	0.324519	0.210463	0.312807	0.0132049	0.131816	6.83504	6.98437	7.15956	7.0455
LRRC8B	leucine rich repeat containing 8 family, member B	23507	HGNC:30692|MIM:612888|Ensembl:ENSG00000197147|HPRD:18145|Vega:OTTHUMG00000010129	TA-LRRP|TALRRP	NM_015350	GCACATCCAGGGTGGACTGGGAGCTATGAAATGACTAAATTCCTCCTTGC	chr1	90024271	90063420	+	N	N	N	N	II1	e0	-2.05	-2.49	-0.44	0.402693	0.195705	0.256151	0.00462062	0.188491	0.0759487	6.79806	7.20075	6.99377	7.05421
FLJ27354	uncharacterized LOC400761	400761	Ensembl:ENSG00000231999	-	NR_033981	GCACCCAAAGTCAAACTAGTGCTCCGCGCTGGCAGTCTGGAAAAGGCAGA	chr1	90090407	90098453	-	N	N	N	N	II1	e0	-5.96	-11.05	-5.09	-0.0756424	-0.0159329	-0.0844417	0.76299	0.961656	0.757715	7.15252	7.07687	7.13658	7.06807
LRRC8C	leucine rich repeat containing 8 family, member C	84230	HGNC:25075|MIM:612889|Ensembl:ENSG00000171488|HPRD:13284|Vega:OTTHUMG00000010305	AD158|FAD158	NM_032270	CCTACATCCCAGAGCATATAAAGAAACTCACCAGCCTGGAACGCCTGTCC	chr1	90098643	90185094	+	N	N	N	N	II1	e0	-3.3	-4.96	-1.66	0.137752	0.0960385	0.173392	0.205556	0.446241	0.105475	6.94936	7.08711	7.0454	7.12275
LRRC8D	leucine rich repeat containing 8 family, member D	55144	HGNC:16992|MIM:612890|Ensembl:ENSG00000171492|HPRD:11287|Vega:OTTHUMG00000010583	LRRC5	NM_001134479	CATCACCTCACTCCCAGAGAAAGTTGGTCAGCTCTCCCAGCTCACTCAGC	chr1	90286572	90401989	+	N	N	N	N	II1	e0	-5.44	-5.64	-0.2	0.188575	0.115287	0.405224	0.262197	0.580467	0.00934837	7.93678	8.12535	8.05206	8.342
GEMIN8P4	gem (nuclear organelle) associated protein 8 pseudogene 4	492303	HGNC:37979	-	NR_002830	TTTGTACTGGGACAGCGCCGCCAAGATCCAGGCCATGGAGGCTAACGTGC	chr1	90458823	90460525	-	N	N	N	N	II1	e0	-5.94	-5.94	0	-0.148513	-0.0719854	-0.0462592	0.108303	0.555752	0.779027	6.9154	6.76689	6.84342	6.86914
ZNF326	zinc finger protein 326	284695	HGNC:14104|MIM:614601|Ensembl:ENSG00000162664|HPRD:15774|Vega:OTTHUMG00000010675	ZAN75|ZIRD|Zfp326|dJ871E2.1	NM_182976	GTAGGCTCTCGGGGGAGAGGAACGCCTGCTTATCCTGAAAGTACGTTTGG	chr1	90460677	90494094	+	N	N	N	N	II1	e0	-5.8	-3.27	2.53	0.203305	0.233511	0.121935	0.0792459	0.0430189	0.407695	7.11586	7.31916	7.34937	7.23779
BARHL2	BarH-like homeobox 2	343472	HGNC:954|MIM:605212|HPRD:05555	-	NM_020063	GGAAGGCAGAGGAGTAAGAGAGGAAGATGCTTACCAGTGGGCAGGGGACC	chr1	91177578	91182794	-	N	N	N	N	II1	e0	-4.78	-3.02	1.76	-0.0457103	-0.0144042	0.00569706	0.846843	0.95818	0.986449	6.76795	6.72224	6.75355	6.77365
ZNF644	zinc finger protein 644	84146	HGNC:29222|MIM:614159|Ensembl:ENSG00000122482|HPRD:15885|Vega:OTTHUMG00000010078	BM-005|MYP21|NatF|ZEP-2	NM_201269	TCATGTCAGGGGGCATCTTCACAGAGCAGGATTAAGCTATGAAGCCCGTC	chr1	91380856	91487812	-	N	N	N	N	II1	e0	-3.52	-3.82	-0.3	0.360243	0.233144	0.293079	0.000868257	0.0196332	0.00479733	7.61518	7.97542	7.84833	7.90826
HFM1	HFM1, ATP-dependent DNA helicase homolog (S. cerevisiae)	164045	HGNC:20193|Ensembl:ENSG00000162669|HPRD:13423|HPRD:18568|Vega:OTTHUMG00000010093	MER3|RP11-539G11.1|SEC63D1|Si-11|Si-11-6|helicase	NM_001017975	CTGCTATGCCCAAGTTCAGTGCATCCTCCATGACAAAATTACCTCAACAA	chr1	91726322	91870426	-	Y	Y	Y	N	PI1	e0	3.17	1.56	-1.61	0.0363883	0.0439482	0.0588023	0.833942	0.784075	0.720818	6.75393	6.79032	6.79788	6.81273
CDC7	cell division cycle 7	8317	HGNC:1745|MIM:603311|Ensembl:ENSG00000097046|HPRD:10345|Vega:OTTHUMG00000047810	CDC7L1|HsCDC7|Hsk1|huCDC7	NM_003503	GACAGCATATCAAACTTCCTATGGGAAAAAGTCTGGTGGGTGGTCAGCTG	chr1	91966403	91991321	+	N	N	N	N	II1	e2	-6.32	-8.01	-1.69	-0.298291	-0.710785	-0.359061	0.0274575	3.40506e-05	0.0102292	9.421	9.12271	8.71021	9.06194
TGFBR3	transforming growth factor, beta receptor III	7049	HGNC:11774|MIM:600742|Ensembl:ENSG00000069702|HPRD:02846	BGCAN|betaglycan	NM_001195684	TGCATGGCAAATCCTGTCGGTCTCCAGTTGGTTATCTGAATAGTGTCACC	chr1	92145899	92371559	-	N	N	N	N	II1	e0	-2.5	-2.96	-0.46	0.128419	0.0216816	0.0411099	0.316121	0.9223	0.858016	6.81436	6.94278	6.83605	6.85547
BRDT	bromodomain, testis-specific	676	HGNC:1105|MIM:602144|Ensembl:ENSG00000137948|HPRD:03684|Vega:OTTHUMG00000010113	BRD6|CT9	NM_001242806	GTGCAGATGTTCCTGGGAGGTCAAGTTAAGAGTCAAAAATAATTCATTAG	chr1	92414927	92479985	+	Y	N	Y	N	PI1	e0	0.82	-2.33	-3.15	-0.12029	-0.0940553	-0.0142659	0.249466	0.416321	0.949649	6.74264	6.62235	6.64858	6.72837
EPHX4	epoxide hydrolase 4	253152	HGNC:23758|Ensembl:ENSG00000172031|HPRD:12408|Vega:OTTHUMG00000010114	ABHD7|EPHXRP	NM_173567	CTGTGGGGAGAGAATGACGCATTCATGGAGGTTGAGATGGCTGAAGTCAC	chr1	92495532	92529093	+	N	N	N	N	II1	e0	-1.38	-1.55	-0.17	0.176657	0.00948587	0.0215769	0.176488	0.970325	0.940591	6.9318	7.10846	6.94129	6.95338
BTBD8	BTB (POZ) domain containing 8	284697	HGNC:21019|Ensembl:ENSG00000189195|HPRD:12542|Vega:OTTHUMG00000010289	-	NM_183242	GCCTGATTATTGCTCATTCAGTTGGAGTGGAAAGTCTTTTTGCTGACTGC	chr1	92545861	92613401	+	Y	N	Y	N	PI1	e0	-0.03	-1.71	-1.68	-0.0664946	-0.0609309	-0.0491394	0.641867	0.681446	0.790427	6.74284	6.67634	6.68191	6.6937
KIAA1107	KIAA1107	23285	HGNC:29192|Ensembl:ENSG00000069712|Vega:OTTHUMG00000010292	-	NM_015237	CGAGCATCACCATGGCTAGTTTTTCCTCTGAAGATTGTTCGCCTCAAGGC	chr1	92632608	92650280	+	Y	N	Y	N	PI1	e0	-1.2	-0.24	0.96	-0.0104196	0.0562683	0.0967051	0.966235	0.749026	0.537307	6.81333	6.80291	6.86959	6.91003
C1orf146	chromosome 1 open reading frame 146	388649	HGNC:24032|Ensembl:ENSG00000203910|HPRD:17988|Vega:OTTHUMG00000010285	RP11-163M2.4	NM_001012425	GCCCTCCATGGGCCTGAAGAATGGAAACTGATGTTCAGGATTCAGCAGAG	chr1	92683572	92711367	+	Y	N	Y	N	PI1	e0	1.05	-1.37	-2.42	-0.105693	-0.0395092	0.00501759	0.356435	0.811485	0.984009	6.81806	6.71236	6.77855	6.82307
GLMN	glomulin, FKBP associated protein	11146	HGNC:14373|MIM:601749|Ensembl:ENSG00000174842|HPRD:03451|Vega:OTTHUMG00000010283	FAP|FAP48|FAP68|FKBPAP|GLML|GVM|VMGLOM	NM_053274	GTGGAGAAGAGATCCCTAATATGCCTCCTGAAATGCAGCTTAAGGTCCTG	chr1	92711954	92764566	-	N	N	N	N	II1	e0	-2.46	-2.43	0.03	0.412037	0.132263	0.181807	0.0123664	0.551809	0.382482	8.85259	9.26462	8.98485	9.03439
RPAP2	RNA polymerase II associated protein 2	79871	HGNC:25791|MIM:611476|Ensembl:ENSG00000122484|HPRD:07814|Vega:OTTHUMG00000010288	C1orf82	NM_024813	TCTCTGTATGGGCAAAGGCTACTGTCATCCTGTTGTTGGTCTGGGGCCAC	chr1	92764521	92853732	+	N	N	N	N	II1	e0	-2.36	-3.5	-1.14	0.259607	0.264052	0.190984	0.0198766	0.0189302	0.107737	7.85245	8.11205	8.1165	8.04343
GFI1	growth factor independent 1 transcription repressor	2672	HGNC:4237|MIM:600871|Ensembl:ENSG00000162676|HPRD:07527|Vega:OTTHUMG00000010897	GFI-1|GFI1A|SCN2|ZNF163	NM_005263	CTGACTGCTCCTCAAAAGCTAACGGTTGCACCTCCAAGTGGCTGGGTCTG	chr1	92940317	92952433	-	N	N	N	N	II1	e2	-9.22	-7.15	2.07	-0.557464	-0.460679	-0.496779	0.00068178	0.0030344	0.00190215	8.72466	8.1672	8.26398	8.22789
EVI5	ecotropic viral integration site 5	7813	HGNC:3501|MIM:602942|Ensembl:ENSG00000067208|HPRD:04249|Vega:OTTHUMG00000010895	NB4S	NM_005665	CCTGTGAAAGAATAACCACTGCACTCCAACCTGGGCAACATGGCAAGACC	chr1	92974252	93257961	-	Y	Y	Y	N	PI1	e0	-0.8	-2.15	-1.35	0.28125	0.259162	0.138028	0.291066	0.349201	0.731364	7.64909	7.93034	7.90826	7.78712
RPL5	ribosomal protein L5	6125	HGNC:10360|MIM:603634|Ensembl:ENSG00000122406|HPRD:04699|Vega:OTTHUMG00000010899	DBA6|L5	NM_000969	GGAGCGGGCTGCTGAGAGCTAAACCCAGCAATTTTCTATGATTTTTTCAG	chr1	93297593	93307481	+	N	N	N	N	II1	e0	-5.47	-7.25	-1.78	-0.0395924	-0.022898	-0.118442	0.844568	0.916718	0.410631	12.7122	12.6726	12.6893	12.5938
FAM69A	family with sequence similarity 69, member A	388650	HGNC:32213|MIM:614542|Ensembl:ENSG00000154511|HPRD:14204|Vega:OTTHUMG00000010894	-	NM_001252273	GTGACCATCACTGGACAGCTTTCTCTCAAAACTTTCCTTCAACGCCATGG	chr1	93298285	93427079	-	N	N	N	N	II1	e0	-4.04	-4.14	-0.1	-0.36969	-0.331589	-0.196075	0.00489811	0.0107176	0.164385	8.68161	8.31192	8.35002	8.48553
SNORD21	small nucleolar RNA, C/D box 21	6083	HGNC:10144|MIM:603635	RNU21|U21	NR_000006	CCCACTAACTGAGCAGTCAGTAGTTGGTCCTTTGGTTGCATATGATGCGA	chr1	93302845	93302940	+	N	N	N	N	II1	e0	-2.81	-9.44	-6.63	-0.316471	-0.3971	-0.495727	0.0157072	0.00356826	0.000675526	7.43101	7.11454	7.03391	6.93528
SNORA66	small nucleolar RNA, H/ACA box 66	26782	HGNC:10223	RNU66|U66	NR_002444	CGATCACTAGCTCTGCGTGATGTGGCAGAAGCAAAGGGAACCAGGTTTGC	chr1	93306275	93306408	+	N	N	N	N	II1	e0	-2.95	-7.6	-4.65	0.0334343	-0.0066348	-0.0424349	0.887122	0.979269	0.868096	7.10011	7.13354	7.09347	7.05767
MTF2	metal response element binding transcription factor 2	22823	HGNC:29535|MIM:609882|Ensembl:ENSG00000143033|HPRD:14342|Vega:OTTHUMG00000010161	M96|PCL2|RP5-976O13.1|TDRD19A|dJ976O13.2	NM_001164391	GCACTCTGATTTTCTGTAGGTACAGTTCAAAGCCCTAAAGGGAGTCTGGC	chr1	93544791	93604638	+	N	N	N	N	II1	e0	-4.47	-6.21	-1.74	0.418971	0.368125	0.172907	0.0151538	0.0339969	0.450634	8.80106	9.22003	9.16919	8.97397
TMED5	transmembrane emp24 protein transport domain containing 5	50999	HGNC:24251|Ensembl:ENSG00000117500|HPRD:13028|Vega:OTTHUMG00000010162	CGI-100|p28	NM_001167830	GGCCCAACCGATTTCCATAATGTAGCAGTTACCGTGTTCACCTCACACTA	chr1	93615298	93646246	-	N	N	N	N	II1	e0	-7.54	-8.28	-0.74	-0.135746	0.197438	0.423026	0.509383	0.270308	0.0100029	9.38553	9.24979	9.58297	9.80856
CCDC18	coiled-coil domain containing 18	343099	HGNC:30370|Ensembl:ENSG00000122483|Vega:OTTHUMG00000010598	NY-SAR-41|dJ717I23.1	NM_206886	AGATTTGGGGCAAGAATTGAGGCTGACCCGGGAGCAGGTGCAGAACTCTC	chr1	93646272	93744287	+	N	N	N	N	II1	e0	-3.22	-3.72	-0.5	-0.119883	0.0509126	0.148762	0.466216	0.819435	0.363166	7.92976	7.80988	7.98068	8.07853
DR1	down-regulator of transcription 1, TBP-binding (negative cofactor 2)	1810	HGNC:3017|MIM:601482|Ensembl:ENSG00000117505|HPRD:03284|Vega:OTTHUMG00000010862	NC2|NC2-BETA	NM_001938	ACTTATGTATTCACCAAGCCCAAAAATAGATTGTGGCTCCCAGGATTCCA	chr1	93811477	93828148	+	N	N	N	N	II1	e0	-7.96	-9.27	-1.31	-0.179137	-0.0932096	0.00468661	0.223351	0.631558	0.98898	8.97946	8.80032	8.88625	8.98415
FNBP1L	formin binding protein 1-like	54874	HGNC:20851|MIM:608848|Ensembl:ENSG00000137942|HPRD:12317|Vega:OTTHUMG00000010863	C1orf39|TOCA1	NM_001164473	TCCGTAGGAGGCAAGTTCCTTGATGTGGAATAGTGCAACCTGTATATGGG	chr1	93913687	94020218	+	N	N	N	N	II1	e0	-3.44	-3.03	0.41	-0.408008	0.1111	-0.0915895	0.00061326	0.392069	0.55174	8.57426	8.16625	8.68536	8.48267
BCAR3	breast cancer anti-estrogen resistance 3	8412	HGNC:973|MIM:604704|Ensembl:ENSG00000137936|HPRD:05268|Vega:OTTHUMG00000010301	NSP2|SH2D3B	NM_003567	GCCCTCTCGCGTAAATTGGAACCTCCTCCTGTAAAGCAGGCAGAGCTTTG	chr1	94027342	94147394	-	N	N	N	N	II1	e0	-4.71	-3.84	0.87	-0.115467	-0.0941416	0.0795676	0.299378	0.439716	0.579185	7.04949	6.93403	6.95535	7.12906
MIR760	microRNA 760	100126348	HGNC:33666|Ensembl:ENSG00000211575|miRBase:MI0005567	MIRN760|hsa-mir-760	NR_030621	CCGGATACCTCAGAAATTCGGCTCTGGGTCTGTGGGGAGCGAAATGCAAC	chr1	94312387	94312467	+	N	N	N	N	II1	e0	-4.43	-11.44	-7.01	0.120564	0.170683	0.118037	0.465174	0.239573	0.519238	6.80674	6.9273	6.97742	6.92478
DNTTIP2	deoxynucleotidyltransferase, terminal, interacting protein 2	30836	HGNC:24013|MIM:611199|HPRD:09994	ERBP|FCF2|HSU15552|LPTS-RP2|TdIF2	NM_014597	CCGAAGGAAGTACTCAGAGATCATGGCTGAAAAAGCAGCAAATGCAGCAG	chr1	94335013	94344762	-	N	N	N	N	II1	e0	-6.11	-8.69	-2.58	0.023405	-0.0288674	0.0729934	0.904074	0.871851	0.622513	6.77995	6.80336	6.75109	6.85295
GCLM	glutamate-cysteine ligase, modifier subunit	2730	HGNC:4312|MIM:601176|HPRD:03106	GLCLR	NM_002061	ATGTGAAATCTGCCCGGGCACACCTCATGCCTGTAATCCCAGCACTCTGG	chr1	94352589	94375012	-	N	N	N	N	II1	e0	-5.43	-5.18	0.25	0.168246	-0.220226	0.0485597	0.261466	0.114838	0.860822	7.40433	7.57257	7.1841	7.45289
ABCA4	ATP-binding cassette, sub-family A (ABC1), member 4	24	HGNC:34|MIM:601691|Ensembl:ENSG00000198691|HPRD:03408|Vega:OTTHUMG00000010622	ABC10|ABCR|ARMD2|CORD3|FFM|RMP|RP19|STGD|STGD1	NM_000350	CCGGGCCATCCCACTAGCAGCTTTGGCCTCCATATTGCTCTCATTTCAAG	chr1	94458393	94586705	-	N	N	N	N	II1	e0	-5.4	-5.17	0.23	0.0856459	0.100007	0.0888478	0.514601	0.422675	0.535413	6.73905	6.82469	6.83906	6.8279
ARHGAP29	Rho GTPase activating protein 29	9411	HGNC:30207|MIM:610496|HPRD:06674	PARG1|RP11-255E17.1	NM_004815	TGGCTTAGAAGTCAACACCTAGGATCATACATCCGTTGACTACAATGTGG	chr1	94634462	94703307	-	N	N	N	N	II1	e0	-2.07	-3.39	-1.32	0.0809794	0.00181281	-0.0625445	0.658954	0.993829	0.788526	6.63729	6.71827	6.6391	6.57474
ABCD3	ATP-binding cassette, sub-family D (ALD), member 3	5825	HGNC:67|MIM:170995|Ensembl:ENSG00000117528|HPRD:01368|Vega:OTTHUMG00000010717	ABC43|PMP70|PXMP1|ZWS2	NM_001122674	GCAGTCTTGCTTACAAGGAGGGGTTACCATGTATCACACCTAATCTTCCC	chr1	94883932	94944260	+	N	N	N	N	II1	e0	-4.24	-3.57	0.67	-0.16639	-0.193097	-0.103803	0.423206	0.327026	0.716021	8.24892	8.08253	8.05582	8.14511
F3	coagulation factor III (thromboplastin, tissue factor)	2152	HGNC:3541|MIM:134390|Ensembl:ENSG00000117525|HPRD:00603|Vega:OTTHUMG00000010716	CD142|TF|TFA	NM_001993	ATGTGTTAAGTGCAGGAGACATTGGTATTCTGGGCAGCTTCCTAATATGC	chr1	94994731	95007413	-	N	N	N	N	II1	e0	-5.32	-4.18	1.14	-0.0195324	-0.106031	-0.0957668	0.937904	0.509096	0.601677	6.9195	6.89997	6.81347	6.82373
SLC44A3	solute carrier family 44, member 3	126969	HGNC:28689|Ensembl:ENSG00000143036|HPRD:14637|Vega:OTTHUMG00000010700	CTL3	NM_001258342	CCGATGCTGCTACTGCTGTTTCTGGTGTCTTGACAAATACCTGCTCCATC	chr1	95285897	95360803	+	N	N	N	N	II1	e0	-2.77	-2.51	0.26	-0.0251644	0.0272694	0.00638158	0.897341	0.881003	0.979551	6.75785	6.73268	6.78511	6.76423
CNN3	calponin 3, acidic	1266	HGNC:2157|MIM:602374|Ensembl:ENSG00000117519|HPRD:03848|Vega:OTTHUMG00000010783	-	NM_001839	GTGGCCTGTGGACATTTAGGCCTGGGTGATGCATTTGCTCTTCCTGTTTG	chr1	95362504	95392779	-	N	N	N	N	II1	e0	-2.13	-1.26	0.87	-0.114658	-0.04743	-0.0441361	0.305329	0.763017	0.814858	6.82933	6.71467	6.7819	6.78519
RP4-639F20.1	hCG2028352-like	729970	Ensembl:ENSG00000235501	-	NR_033998	ATCGTGCTTTGAGGTGCACTGAACTGCAGCAAACCCAGGGGATCCAAGGC	chr1	95393583	95428826	+	N	Y	N	Y	IP1	e0	-0.51	0.13	0.64	-0.0043189	0.129926	0.044913	0.985381	0.29105	0.8326	6.88004	6.87572	7.00997	6.92496
ALG14	ALG14, UDP-N-acetylglucosaminyltransferase subunit	199857	HGNC:28287|MIM:612866|Ensembl:ENSG00000172339|HPRD:14466|Vega:OTTHUMG00000010781	-	NM_144988	CACCACCTTGCACTCCATGTGGCTCTCCTTTCCCCTAATTCACAGGGTGA	chr1	95448278	95538507	-	Y	Y	Y	N	PI1	e0	-0.27	-1.45	-1.18	0.188305	-0.0630278	-0.293629	0.184365	0.769569	0.030747	8.04734	8.23564	7.98431	7.75371
TMEM56	transmembrane protein 56	148534	HGNC:26477|Ensembl:ENSG00000152078|HPRD:08110|Vega:OTTHUMG00000010847	-	NM_152487	TTCTGTTTGCAAAATCTTCCCTGAGTTCTGAACCCAGCACCATCAGTACC	chr1	95582893	95663161	+	Y	Y	N	Y	IP1	e0	4.12	2.87	-1.25	0.111643	0.0347327	0.0841049	0.532607	0.892119	0.71182	6.55288	6.66452	6.58761	6.63698
RWDD3	RWD domain containing 3	25950	HGNC:21393|Ensembl:ENSG00000122481|HPRD:11527|Vega:OTTHUMG00000010910	RSUME	NM_001128142	CAGCAGAATCTCAGGCATATCCTCAGCCAACCAGAAACTGGCAGTGGCAG	chr1	95699710	95712781	+	N	Y	N	N	II1	e0	-3.59	-2.53	1.06	-0.177994	-0.260038	-0.142959	0.306373	0.0980252	0.4933	7.72953	7.55154	7.46949	7.58657
PTBP2	polypyrimidine tract binding protein 2	58155	HGNC:17662|MIM:608449|Ensembl:ENSG00000117569|HPRD:12233|Vega:OTTHUMG00000010685	PTB|PTBLP|brPTB|nPTB|nPTB5|nPTB6|nPTB7|nPTB8	NM_021190	GTGGCAGTTTTCTAAAACTGACAACCAGGTGGGACCAAAGTTTATGTGCC	chr1	97187174	97280605	+	Y	Y	N	N	PP1	e2	-3.42	-2.55	0.87	-0.244947	-0.559104	-0.729158	0.384721	0.0186912	0.0034354	8.55765	8.3127	7.99855	7.82849
DPYD	dihydropyrimidine dehydrogenase	1806	HGNC:3012|MIM:612779|Ensembl:ENSG00000188641|HPRD:02036|Vega:OTTHUMG00000039683	DHP|DHPDHASE|DPD	NM_001160301	TCCCCTTCGCTGAAATTGCTTATTTTTGGTGTTGGATAGAGGATAGGGAG	chr1	98185313	98386615	-	Y	Y	N	Y	IP1	e0	2.75	2.41	-0.34	-0.233095	-0.353655	-0.284128	0.163558	0.0267788	0.0881395	7.5966	7.3635	7.24294	7.31247
MIR137HG	MIR137 host gene (non-protein coding)	400765	HGNC:42871|Ensembl:ENSG00000225206|HPRD:16937	-	NR_046105	GTCACCACTAGTCAATGACTGCTTTTGCCCTGTCACTGTCCATAGCCATG	chr1	98453555	98515249	-	Y	Y	N	N	PP1	e0	5.56	5.12	-0.44	-0.0523131	0.0387533	-0.0889479	0.689754	0.788456	0.441079	6.68038	6.62806	6.71913	6.59143
MIR137	microRNA 137	406928	HGNC:31523|MIM:614304|Ensembl:ENSG00000225206|miRBase:MI0000454	MIRN137|miR-137	NR_029679	GTCCTCTGACTCTCTTCGGTGACGGGTATTCTTGGGTGGATAATACGGAT	chr1	98511625	98511727	-	Y	Y	N	N	PP1	e0	1.23	5.56	4.33	-0.053249	-0.013613	-0.0304928	0.855128	0.968459	0.933341	6.7556	6.70235	6.74198	6.7251
SNX7	sorting nexin 7	51375	HGNC:14971|MIM:614904|Ensembl:ENSG00000162627|HPRD:15416|Vega:OTTHUMG00000010723	-	NM_152238	GAGGTTGAATGTCACTCCAGTTTCTCAAGTTGCTGCTGAGAGAAGACCTG	chr1	99127235	99226056	+	Y	Y	N	N	PP1	e0	7.05	6.79	-0.26	-0.017448	-0.0891512	-0.0793668	0.955962	0.693694	0.769579	6.64275	6.62531	6.5536	6.56339
LPPR5	lipid phosphate phosphatase-related protein type 5	163404	Ensembl:ENSG00000117598|HPRD:12966|Vega:OTTHUMG00000010738	PAP2|PAP2D|PRG5	NM_001037317	GACTTCCAAGCAGCCAAGCAGGAATGTTTTTCCTGTTGGAAGCCTTAGCC	chr1	99355800	99470449	-	Y	Y	N	N	PP1	e0	5.12	5.31	0.19	-0.0877678	-0.206851	-0.106228	0.573512	0.0781858	0.502951	6.7567	6.66893	6.54985	6.65047
LPPR4	lipid phosphate phosphatase-related protein type 4	9890	MIM:607813|Ensembl:ENSG00000117600|HPRD:07425|Vega:OTTHUMG00000010763	LPR4|PHP1|PRG-1|PRG1|RP4-788L13.1	NM_001166252	AGGACAAAAACAAGCAAACAAAAACCCCTGCTGCAGCATTTCAGGTGCAG	chr1	99729847	99775138	+	Y	Y	N	N	PP1	e0	6.25	6.64	0.39	0.0770241	-0.0149845	0.013065	0.699346	0.956886	0.967863	6.6857	6.76273	6.67072	6.69877
PALMD	palmdelphin	54873	HGNC:15846|MIM:610182|Ensembl:ENSG00000099260|HPRD:06673|Vega:OTTHUMG00000010764	C1orf11|PALML	NM_017734	GGGTCTGAGTTTGGATAGTCCGGCCAGCGCACAGATCATAACCCGCACAT	chr1	100111430	100160097	+	Y	Y	N	N	PP1	e0	3.68	4.56	0.88	-0.00465859	0.0251631	0.0469455	0.980669	0.882239	0.77935	6.94522	6.94056	6.97038	6.99216
FRRS1	ferric-chelate reductase 1	391059	HGNC:27622|MIM:611578|Ensembl:ENSG00000156869|HPRD:18403|Vega:OTTHUMG00000010768	SDFR2|SDR2	NM_001013660	GTCCTGACTGCCTGGAGCATATTTGTGAATTCTCACTTGGAAGACTGGGG	chr1	100174258	100231349	-	Y	Y	Y	Y	AMB1	e0	1.63	-0.9	-2.53	0.0454217	0.127369	0.13852	0.908343	0.659357	0.653724	7.44406	7.48948	7.57143	7.58258
AGL	amylo-alpha-1, 6-glucosidase, 4-alpha-glucanotransferase	178	HGNC:321|MIM:610860|Ensembl:ENSG00000162688|HPRD:01984|Vega:OTTHUMG00000010803	GDE	NM_000642	CCCTTCTCTAAACTGTGCGGGTAAAAGGAATGACTGTCCTTGAGAGAACC	chr1	100315639	100389579	+	Y	N	Y	N	PI1	e0	0.16	-2.06	-2.22	0.308962	0.142563	0.249545	0.0465898	0.469805	0.138013	7.49416	7.80312	7.63673	7.74371
SLC35A3	solute carrier family 35 (UDP-N-acetylglucosamine (UDP-GlcNAc) transporter), member A3	23443	HGNC:11023|MIM:605632|Ensembl:ENSG00000117620|HPRD:10413|Vega:OTTHUMG00000010805	-	NM_001271684	GCTTCAAGACTGCTGAAAGCAATCCAGTTGCTCCTGTGCTAGATGGTAGC	chr1	100435344	100492534	+	N	N	N	N	II1	e0	-2.95	-2.26	0.69	0.102075	-0.128432	0.0941055	0.663634	0.554438	0.730594	8.22319	8.32527	8.09476	8.3173
HIAT1	hippocampus abundant transcript 1	64645	HGNC:23363|Ensembl:ENSG00000156875|HPRD:11022|Vega:OTTHUMG00000010755	-	NM_033055	TTTCAGGACCCTAGAGGAGAGCTTTATACAATTACCGATGTGAATTTCTC	chr1	100503788	100548929	+	N	N	N	N	II1	e0	-5.09	-6.43	-1.34	0.159661	0.144522	0.149122	0.400072	0.468938	0.485534	7.02107	7.18073	7.16559	7.17019
SASS6	spindle assembly 6 homolog (C. elegans)	163786	HGNC:25403|MIM:609321|Ensembl:ENSG00000156876|HPRD:10907|Vega:OTTHUMG00000010754	SAS-6|SAS6	NM_194292	ATATTAGGCAGTTGATACTCCCCCACCTCCCCCATTTAGATACACTACTG	chr1	100549101	100598511	-	N	N	N	N	II1	e0	-2.48	-3.2	-0.72	0.0505508	0.0299712	0.124709	0.855222	0.919236	0.56872	7.06368	7.11423	7.09365	7.18839
TRMT13	tRNA methyltransferase 13 homolog (S. cerevisiae)	54482	HGNC:25502|Ensembl:ENSG00000122435|HPRD:07659|Vega:OTTHUMG00000010841	CCDC76	NM_019083	GTCTCGGTTCAAATTCCAAACCTACCATCTTCAGTTGTGCGACCTTGGGC	chr1	100598705	100616054	+	N	N	N	N	II1	e1	-3.84	-1.58	2.26	0.534156	0.267734	0.428035	0.00465209	0.170854	0.0226582	8.09627	8.63042	8.364	8.5243
LRRC39	leucine rich repeat containing 39	127495	HGNC:28228|Ensembl:ENSG00000122477|HPRD:17501|Vega:OTTHUMG00000010839	-	NM_144620	CCTCCCAGTGAAGGCACAGATGAAGAAGAGGAACGGGAATTATTTGGCCT	chr1	100614003	100643829	-	N	N	N	N	II1	e0	0.23	-1.45	-1.68	0.138778	0.0942483	0.0720227	0.363115	0.605911	0.752388	6.77343	6.91221	6.86768	6.84545
DBT	dihydrolipoamide branched chain transacylase E2	1629	HGNC:2698|MIM:248610|Ensembl:ENSG00000137992|HPRD:02010|Vega:OTTHUMG00000010921	BCATE2|BCKAD-E2|BCKADE2|E2|E2B	NM_001918	GCCCAGGAGTTCAAAGCTGTAGTGAGCTGTCATTGTGCCACTATCCTCCA	chr1	100652477	100715409	-	N	N	N	N	II1	e0	-3.98	-2.32	1.66	0.0351633	0.300298	0.181652	0.894033	0.0262768	0.240843	9.01753	9.05269	9.31783	9.19918
RTCA	RNA 3'-terminal phosphate cyclase	8634	HGNC:17981|MIM:611286|Ensembl:ENSG00000137996|HPRD:15280|Vega:OTTHUMG00000010920	RPC|RTC1|RTCD1	NM_003729	GGTGGTACTGTGGATGAGTATCTGCAAGACCAGCTGATTGTTTTCATGGC	chr1	100731713	100758325	+	N	N	N	N	II1	e0	-3.76	-4.07	-0.31	-0.0897021	0.0839421	0.210141	0.611715	0.648315	0.12116	9.21988	9.13017	9.30382	9.43002
MIR553	microRNA 553	693138	HGNC:32809|miRBase:MI0003558	MIRN553|hsa-mir-553	NR_030279	ACGGTGAGATTTTGTTTTGTCTGAGAAAATCTCGCTGTTTTAGACTGAGG	chr1	100746796	100746864	+	N	N	N	N	II1	e0	-8.86	-4.31	4.55	-0.0229521	0.0442385	-0.0295402	0.902559	0.771679	0.883316	6.66526	6.64231	6.7095	6.63572
CDC14A	cell division cycle 14A	8556	HGNC:1718|MIM:603504|Ensembl:ENSG00000079335|HPRD:04614|Vega:OTTHUMG00000010987	cdc14|hCDC14	NM_003672	GAGAAGTAGGGGAAAGGGAATCATGTTGACAGTTTTAGTTCTGTGAACAC	chr1	100818022	100985833	+	Y	Y	N	N	PP1	e0	-1.78	-1.87	-0.09	0.0486645	0.0698331	0.123264	0.80107	0.679287	0.395201	6.7697	6.81836	6.83953	6.89296
GPR88	G protein-coupled receptor 88	54112	HGNC:4539|MIM:607468|Ensembl:ENSG00000181656|HPRD:16248|Vega:OTTHUMG00000010981	STRG	NM_022049	CCAGCTTGCTTTGTTGCACGCCTGGGCAATTTCAGCCAGGACATTAGGAC	chr1	101003727	101007583	+	N	N	N	N	II1	e0	-1.47	-1.18	0.29	0.0768119	0.0287199	-0.00523052	0.47503	0.848811	0.98051	6.63177	6.70858	6.66049	6.62653
VCAM1	vascular cell adhesion molecule 1	7412	HGNC:12663|MIM:192225|Ensembl:ENSG00000162692|HPRD:01888|Vega:OTTHUMG00000010982	CD106|INCAM-100	NM_001078	TTCACGAAGTTTGTTCATCAGACTCCTGTGCAACTTTCCCAATGTGGCCT	chr1	101185195	101204601	+	Y	Y	N	N	PP1	e1	5.14	2.76	-2.38	0.900018	1.21332	1.2513	3.63826e-06	1.59826e-07	1.12765e-07	7.03675	7.93677	8.25008	8.28805
EXTL2	exostosin-like glycosyltransferase 2	2135	HGNC:3516|MIM:602411|Ensembl:ENSG00000162694|HPRD:03876|Vega:OTTHUMG00000011814	EXTR2	NM_001261440	GCACCAGGGTCTGGAAATGGTGACCAGTACTCTATGGTGCTGATTGGAGC	chr1	101337927	101360735	-	N	N	N	N	II1	e0	-2.84	-5.43	-2.59	-0.207849	-0.18322	0.0271042	0.0765668	0.131217	0.916545	7.95956	7.75171	7.77634	7.98666
SLC30A7	solute carrier family 30 (zinc transporter), member 7	148867	HGNC:19306|MIM:611149|Ensembl:ENSG00000162695|HPRD:15369|Vega:OTTHUMG00000011815	ZNT7|ZnT-7|ZnTL2	NM_001144884	CCCCCAGAAGCCTTAGTGACCCAGATCTCAACCAGAGACTCAAGATAGCC	chr1	101361631	101447311	+	N	N	N	N	II1	e0	-3.54	-5.87	-2.33	0.297069	0.12726	0.107311	0.00441843	0.26237	0.411548	9.17305	9.47011	9.3003	9.28036
DPH5	diphthamide biosynthesis 5	51611	HGNC:24270|MIM:611075|HPRD:13037	CGI-30|HSPC143|NPD015	NM_015958	GCCAGGGTTGGAGCCGACGACCAGAAAATTGCAGCAGGCACTTTAAGGCA	chr1	101455179	101491362	-	N	N	N	N	II1	e0	-4.49	-4.17	0.32	-0.257683	0.00848207	-0.13002	0.0623486	0.976216	0.487153	9.41983	9.16215	9.42831	9.28981
S1PR1	sphingosine-1-phosphate receptor 1	1901	HGNC:3165|MIM:601974|Ensembl:ENSG00000170989|HPRD:03578|Vega:OTTHUMG00000010835	CD363|CHEDG1|D1S3362|ECGF1|EDG-1|EDG1|S1P1	NM_001400	GGCTATGTTGAGTACGTAGGCTGTGGGAAGATGAAGATGGTTTGGAGGTG	chr1	101702304	101707076	+	N	N	N	N	II1	e0	-8.53	-13.31	-4.78	-0.467456	-0.350927	-0.489631	0.0883054	0.239082	0.0830406	8.013	7.54554	7.66207	7.52337
OLFM3	olfactomedin 3	118427	HGNC:17990|MIM:607567|Ensembl:ENSG00000118733|Vega:OTTHUMG00000010941	NOE3|NOELIN3|NOELIN3_V1|NOELIN3_V2|NOELIN3_V3|NOELIN3_V4|NOELIN3_V5|NOELIN3_V6|OPTIMEDIN	NM_058170	CTCTGTTCACTCCACTGAATGCAACCCATATAGTTTCTTGCACAAGGTGC	chr1	102268122	102462790	-	Y	Y	N	N	PP1	e0	8.88	6.59	-2.29	-0.0863902	-0.0357374	-0.116785	0.464607	0.824859	0.299191	6.69453	6.60814	6.65879	6.57774
COL11A1	collagen, type XI, alpha 1	1301	HGNC:2186|MIM:120280|Ensembl:ENSG00000060718|HPRD:00375|Vega:OTTHUMG00000010872	CO11A1|COLL6|STL2	NM_001190709	GGTGCCACCAACCCATTTTGTGCCACATGCAAGTTTTGAATAAGGATGGT	chr1	103342022	103574052	-	Y	Y	N	N	PP1	e0	7.6	5.76	-1.84	-0.0663654	-0.157543	-0.0816977	0.663908	0.151173	0.599357	6.69301	6.62665	6.53547	6.61131
RNPC3	RNA-binding region (RNP1, RRM) containing 3	55599	HGNC:18666|Ensembl:ENSG00000185946|HPRD:15267|Vega:OTTHUMG00000166613	RBM40|RNP|SNRNP65	NM_017619	CACCTTTGTGTCCTTCACACAGCAGTTTACATCCAGTGCTGTTACCTTCA	chr1	104068577	104097859	+	Y	Y	N	Y	IP1	e0	-0.16	0.77	0.93	-0.229425	-0.0570859	-0.0286965	0.145405	0.825867	0.933629	7.43333	7.20391	7.37624	7.40463
AMY2B	amylase, alpha 2B (pancreatic)	280	HGNC:478|MIM:104660|Ensembl:ENSG00000240038|HPRD:00095|Vega:OTTHUMG00000011024	AMY2|AMY3|HXA	NM_020978	TCTGGCGATGTGGAACCCATGGATATGGAGGGCTGACTATATACACCATG	chr1	104097265	104122156	+	Y	Y	N	N	PP1	e0	2.73	4.1	1.37	0.0657044	0.0767664	0.0883241	0.725937	0.664692	0.632211	6.71855	6.78425	6.79531	6.80687
ACTG1P4	actin, gamma 1 pseudogene 4	648740	HGNC:149	ACTGP4	NR_024438	AACGTACTTGTGGAAGACAAGTCTGGCTTGGTGAGTCTGCATGGCCAGCA	chr1	104112025	104114008	+	Y	Y	N	N	PP1	e0	1.4	9.5	8.1	0.0592022	0.0534113	0.0417537	0.863045	0.874037	0.919016	6.92686	6.98606	6.98027	6.96861
AMY2A	amylase, alpha 2A (pancreatic)	279	HGNC:477|MIM:104650|Ensembl:ENSG00000243480|HPRD:00094|Vega:OTTHUMG00000011023	AMY2|AMY2B|PA	NM_000699	GAGAAGATGTCTTACTTAAAGAACTGGGGAGAAGGTTGGGGTTTCGTACC	chr1	104159998	104168400	+	Y	Y	N	N	PP1	e0	6.18	7.15	0.97	-0.0814013	-0.107958	-0.040753	0.681108	0.54771	0.887315	6.96216	6.88075	6.8542	6.9214
AMY1A	amylase, alpha 1A (salivary)	276	HGNC:474|MIM:104700|Ensembl:ENSG00000237763|HPRD:00096|Vega:OTTHUMG00000011020	AMY1	NM_004038	TTACGTTATCTACCAGAGCACCGTGGGCTGTTACTTGCCTTGAGTTGGAA	chr1	104198301	104207173	+	Y	Y	N	N	PP1	e0	5.73	5.67	-0.06	0.219595	0.13211	0.143594	0.0739591	0.358754	0.336907	8.7639	8.98349	8.89601	8.90749
AMY1C	amylase, alpha 1C (salivary)	278	HGNC:476|MIM:104702|Ensembl:ENSG00000187733|HPRD:15911|Vega:OTTHUMG00000011045	AMY1	NM_001008219	GGTCAGCAGTCTCTGATCCGTGCAGGGTATTAATGTGTCAGGGCTGAGTG	chr1	104198302	104207172	+	Y	Y	N	N	PP1	e0	5.73	5.67	-0.06	0.152873	0.283812	0.215369	0.752385	0.453782	0.64649	11.8712	12.0241	12.155	12.0866
AMY1B	amylase, alpha 1B (salivary)	277	HGNC:475|MIM:104701|Ensembl:ENSG00000174876|HPRD:18510|Vega:OTTHUMG00000011021	AMY1	NM_001008218	TTAGCTTACGTTATCTACCAGAGCACCGTGGGCTGTTACTTGCCTTGAGT	chr1	104198324	104207172	+	Y	Y	N	N	PP1	e0	5.73	5.67	-0.06	0.317195	0.150122	0.147471	0.142599	0.60705	0.648466	7.36818	7.68538	7.5183	7.51565
LOC100129138	THAP domain containing, apoptosis associated protein 3 pseudogene	100129138	Ensembl:ENSG00000215869	-	NR_033990	GGGAGGAAGCCATGTGAGGGGGCCGGCTCTGTGGCAGATTGTAATAGCAT	chr1	104615644	104619693	+	Y	Y	N	N	PP1	e0	8.84	3.23	-5.61	-0.100579	0.137032	0.176337	0.659763	0.499536	0.369234	6.91807	6.81749	7.0551	7.0944
PRMT6	protein arginine methyltransferase 6	55170	HGNC:18241|MIM:608274|Ensembl:ENSG00000198890|HPRD:10505|Vega:OTTHUMG00000010964	HRMT1L6	NM_018137	GGAGGGATCATGTGAGTTGGCCTACTTACAAGTAGTGAAAGTTCCCTTTT	chr1	107599266	107601916	+	Y	N	Y	N	PI1	e0	-7.33	-8.26	-0.93	0.355993	0.183703	0.18364	0.00120441	0.0781704	0.0870272	8.99637	9.35237	9.18008	9.18001
NTNG1	netrin G1	22854	HGNC:23319|MIM:608818|Ensembl:ENSG00000162631|HPRD:16389|Vega:OTTHUMG00000010965	Lmnt1	NM_001113228	CACTGTGCAGAGATTTCTCTGTAAGGGCAACGAACGTGCTGGCATCAAAG	chr1	107682628	108024475	+	Y	Y	N	Y	IP1	e0	3.9	3.27	-0.63	-0.0445375	-0.033232	0.0153488	0.836914	0.882334	0.958352	6.63692	6.59239	6.60369	6.65227
VAV3	vav 3 guanine nucleotide exchange factor	10451	HGNC:12659|MIM:605541|Ensembl:ENSG00000134215|HPRD:05706|Vega:OTTHUMG00000010995	-	NM_001079874	CTTTGTCTTGCCTGTATGCAGCCCTCGTGTAATACGGTGAATTAGAGTGG	chr1	108113781	108231126	-	N	N	N	N	II1	e0	-1.62	-3.67	-2.05	0.389403	0.142428	-0.140773	0.00177774	0.284303	0.325177	9.27274	9.66214	9.41517	9.13197
SLC25A24	solute carrier family 25 (mitochondrial carrier; phosphate carrier), member 24	29957	HGNC:20662|MIM:608744|Ensembl:ENSG00000085491|HPRD:12290|Vega:OTTHUMG00000011013	APC1|SCAMC-1	NM_013386	CTGCAGGAGGGGCTCAGGAACCTGGGCATCCCTCTGGGCCAGGACGCCGA	chr1	108677343	108742980	-	N	N	N	N	II1	e0	-3.58	-2.6	0.98	0.125303	-0.0221339	-0.0620444	0.419544	0.931934	0.793519	6.95851	7.08381	6.93637	6.89646
NBPF4	neuroblastoma breakpoint family, member 4	148545	HGNC:26550|MIM:613994|Ensembl:ENSG00000196427|HPRD:08144|Vega:OTTHUMG00000011318	-	NM_001143989	ACCATGTTCTTGCTGAAAACGCTTAGCCTGAGTTTCATAGGCGGTAACCC	chr1	108765962	108786703	-	N	Y	N	Y	IP1	e0	-0.31	0.21	0.52	0.0357461	-0.0236934	0.0761875	0.866978	0.914731	0.677175	6.7362	6.77195	6.71251	6.81239
NBPF6	neuroblastoma breakpoint family, member 6	653149	HGNC:31988|MIM:613996|Ensembl:ENSG00000186086|Vega:OTTHUMG00000039830	-	NM_001143987	GGCTTGGGCCTACAATGACTTTTCTGAGAGAGGAGCTTTGGGAAGAGCCC	chr1	108992903	109013260	+	N	Y	N	Y	IP1	e0	-0.08	0.24	0.32	0.0436885	0.00562795	0.0994278	0.776491	0.976793	0.406721	6.7309	6.77459	6.73653	6.83033
FAM102B	family with sequence similarity 102, member B	284611	HGNC:27637|Ensembl:ENSG00000162636|HPRD:17339|Vega:OTTHUMG00000010967	SYM-3B	NM_001010883	ATGCGTTGACCAAATCCCATGGAGAAAAGACATCTCATTTGAGGTTCCCC	chr1	109102970	109181949	+	N	N	N	N	II1	e0	-4.12	-5.2	-1.08	-0.162731	0.181915	0.0278921	0.5108	0.446677	0.951556	8.29964	8.13691	8.48155	8.32753
HENMT1	HEN1 methyltransferase homolog 1 (Arabidopsis)	113802	HGNC:26400|MIM:612178|Ensembl:ENSG00000162639|HPRD:08086|Vega:OTTHUMG00000011123	C1orf59|HEN1	NM_001102592	GACTCAATTCCTCTGAGCAGTGATGGTTCTGCAGTGGTGGCTGACCTGCG	chr1	109190909	109203744	-	N	N	N	N	II1	e0	-8.12	-7.59	0.53	-0.0743111	-0.259213	-0.149897	0.7323	0.064722	0.39726	11.1415	11.0672	10.8823	10.9916
PRPF38B	PRP38 pre-mRNA processing factor 38 (yeast) domain containing B	55119	HGNC:25512|Ensembl:ENSG00000134186|HPRD:07664|Vega:OTTHUMG00000010991	NET1|RP11-293A10.1	NM_018061	GAAACGTCAGTAGAGTCACACTTTGTGTACAGGGATGTCTTAGTGCCCAG	chr1	109234931	109244422	+	N	N	N	N	II1	e0	-8.98	-8.99	-0.01	0.0369332	0.0521751	0.0499086	0.898139	0.836945	0.869775	7.9522	7.98913	8.00437	8.00211
FNDC7	fibronectin type III domain containing 7	163479	HGNC:26668|Ensembl:ENSG00000143107|HPRD:08195|Vega:OTTHUMG00000011120	RP11-293A10.2	NM_001144937	GCTGCCAGGGCAACCTGAGATAACAAACGCCCTCATCGCAAGTTAGGAGC	chr1	109255555	109285367	+	N	N	N	N	II1	e0	-3.47	-2.62	0.85	-0.00595697	0.0559044	0.0201065	0.975556	0.666609	0.91857	6.75547	6.74952	6.81138	6.77558
STXBP3	syntaxin binding protein 3	6814	HGNC:11446|MIM:608339|Ensembl:ENSG00000116266|HPRD:10517|Vega:OTTHUMG00000011122	MUNC18-3|MUNC18C|PSP|UNC-18C	NM_007269	GCAGTATGGAATGGTTCAGGAGCTGTAAGTGCTCGCCAGAAACCCAGAGC	chr1	109289284	109352148	+	N	N	N	N	II1	e0	-3.68	-4.5	-0.82	-0.304216	-0.0155641	0.0822328	0.215921	0.973586	0.860081	8.35821	8.054	8.34265	8.44044
AKNAD1	AKNA domain containing 1	254268	HGNC:28398|Ensembl:ENSG00000162641|HPRD:11325|Vega:OTTHUMG00000011231	C1orf62	NR_049760	CTTCATAGTTTTGTACTCACCAGGCTGGAGTGTGGTAGCACGATCTCAGC	chr1	109358519	109400864	-	N	N	N	N	II1	e0	-3.09	-4.35	-1.26	-0.117376	-0.109399	-0.19566	0.343718	0.395245	0.0782505	6.86293	6.74555	6.75353	6.66727
SPATA42	spermatogenesis associated 42 (non-protein coding)	642864	HGNC:41198|Ensembl:ENSG00000203897	AKNAD1-AS1|SRG7	NR_049777	CTAAATTTGATGCTGAAGTGCTAGCCTAAGCTCACTAACCTGCCAACTTA	chr1	109399838	109400962	+	N	N	N	N	II1	e0	-6.81	-2.7	4.11	-0.0479142	-0.0710948	0.0201937	0.827914	0.710465	0.945387	6.84812	6.80021	6.77703	6.86832
GPSM2	G-protein signaling modulator 2	29899	HGNC:29501|MIM:609245|Ensembl:ENSG00000121957|HPRD:06609|Vega:OTTHUMG00000011730	CMCS|DFNB82|LGN|PINS	NM_013296	GCCAGGGCTTCGTCTAACACAAAACAGCCAGTCGGTACTTAGCCACCTGA	chr1	109419602	109473044	+	N	N	N	N	II1	e2	-4.32	-4.29	0.03	-0.592884	-0.620888	-0.637066	3.96133e-05	2.62697e-05	2.20732e-05	8.75178	8.1589	8.13089	8.11471
CLCC1	chloride channel CLIC-like 1	23155	HGNC:29675|Ensembl:ENSG00000121940|HPRD:17471|Vega:OTTHUMG00000011732	MCLC	NM_001048210	CTTCTCTGGACATGCGCGTTTGAGGGTGGAGGGGTCCTGTAAGGTGCTTC	chr1	109472129	109506121	-	N	N	N	N	II1	e2	-5.74	-5.02	0.72	-0.407498	-0.461423	-0.571074	0.0153827	0.00727991	0.00165996	8.8315	8.42401	8.37008	8.26043
WDR47	WD repeat domain 47	22911	HGNC:29141|Ensembl:ENSG00000085433|HPRD:15670|Vega:OTTHUMG00000011734	-	NM_001142551	TTCCGCAGTGCTTTCAGTCTTCCATGTGAGCTCGTGCTGCTGTGACCTGC	chr1	109512837	109584850	-	N	N	N	N	II1	e0	-4.34	-3.02	1.32	0.200932	0.319587	0.257797	0.165367	0.0207264	0.0706469	7.61203	7.81296	7.93161	7.86982
TAF13	TAF13 RNA polymerase II, TATA box binding protein (TBP)-associated factor, 18kDa	6884	HGNC:11546|MIM:600774	TAF(II)18|TAF2K|TAFII-18|TAFII18	NM_005645	TGGCGTGCTAGTGGGATGGCAGATGAGGAAGAAGACCCCACGTTTGAGGA	chr1	109606997	109618624	-	N	N	N	N	II1	e0	-5.23	-6.86	-1.63	0.206701	0.115708	0.0677638	0.0808573	0.42093	0.735789	7.01599	7.22269	7.13169	7.08375
TMEM167B	transmembrane protein 167B	56900	HGNC:30187|Ensembl:ENSG00000215717|HPRD:16474|Vega:OTTHUMG00000042364	C1orf119	NM_020141	ACCAGTTTTTACAGCCTCCTGGGTGGGTCGTCTTGACCCAAACTCTTGTG	chr1	109633402	109639554	+	N	N	N	N	II1	e0	-6.05	-9.03	-2.98	0.139939	0.242191	0.138128	0.519198	0.173059	0.568103	8.28409	8.42403	8.52628	8.42222
SCARNA2	small Cajal body-specific RNA 2	677766	HGNC:32558|Ensembl:ENSG00000270066	HBII-382|mgU2-25/61	NR_003023	ACGAGGCCGGGCTTGTCCCCGGCCACTGATTATCGAGGCGATTCTGATCT	chr1	109642814	109643234	+	N	N	N	N	II1	e0	-8.45	-9.49	-1.04	0.0657065	0.0334339	0.0491693	0.619507	0.838454	0.773143	6.73297	6.79868	6.7664	6.78214
C1orf194	chromosome 1 open reading frame 194	127003	HGNC:32331|Ensembl:ENSG00000179902|Vega:OTTHUMG00000011735	-	NM_001122961	CCATCCACAGCATCCAAGGATCCATAGTGTCCCCTCACACTGCAGCCACC	chr1	109648572	109656479	-	N	N	N	N	II1	e0	-4.93	-6.59	-1.66	-0.0526546	-0.000445117	-0.0548621	0.784931	0.99826	0.800362	6.86452	6.81186	6.86407	6.80966
KIAA1324	KIAA1324	57535	HGNC:29618|MIM:611298|HPRD:13850	EIG121	NM_001284353	GCATAGCACCTTTGCAAGCCTGCGGCGATTTGGGTGCCAGCATCCTGCAA	chr1	109729170	109749403	+	N	N	N	N	II1	e1	-7.04	-3.1	3.94	0.272275	0.942597	1.55826	0.0395837	1.66562e-06	7.30064e-09	6.71469	6.98696	7.65729	8.27295
SARS	seryl-tRNA synthetase	6301	HGNC:10537|MIM:607529|Ensembl:ENSG00000031698|HPRD:09605|Vega:OTTHUMG00000011726	SERRS|SERS	NM_006513	CGCCCATTGAGCAGGAGCCATCAAAGAAGCAGAAGAAGCAACATGAGGGC	chr1	109756514	109780804	+	N	N	N	N	II1	e0	-5.06	-6.55	-1.49	-0.386438	-0.0334479	-0.13472	0.00613469	0.898804	0.469924	9.79973	9.41329	9.76628	9.66501
CELSR2	cadherin, EGF LAG seven-pass G-type receptor 2	1952	HGNC:3231|MIM:604265|Ensembl:ENSG00000143126|HPRD:05040|Vega:OTTHUMG00000012003	CDHF10|EGFL2|Flamingo1|MEGF3	NM_001408	CTGGAGCAGGTGGCTAGAAAAAGAGGCTGTGGGCAGGAAAGAAAGGCTCC	chr1	109792640	109818378	+	N	N	N	N	II1	e0	-5.76	-4.86	0.9	-0.379214	-0.193042	-0.285004	0.000542404	0.052266	0.00558577	7.70408	7.32486	7.51104	7.41907
PSRC1	proline/serine-rich coiled-coil 1	84722	HGNC:24472|MIM:613126|Ensembl:ENSG00000134222|HPRD:13127|Vega:OTTHUMG00000012000	DDA3|FP3214	NM_032636	CCTGAATCGCATTCTCTACTGGACTCTGGCCTGCTTGGAGAGGTGGCAGC	chr1	109822175	109825790	-	N	N	N	N	II1	e2	-6.37	-5.44	0.93	-0.510359	-0.56097	-0.630855	0.0249729	0.0150286	0.00764056	8.27703	7.76667	7.71606	7.64618
MYBPHL	myosin binding protein H-like	343263	HGNC:30434|Ensembl:ENSG00000221986|HPRD:17616|Vega:OTTHUMG00000012002	-	NM_001265613	AGGAAGCCCGCCAGTGGTGAGACTGTGTCCTCAAGGAGCTTCGGCACCAT	chr1	109834986	109849663	-	N	N	N	N	II1	e0	-2.68	-1.42	1.26	0.017801	0.0370561	0.0330679	0.920921	0.805537	0.856883	6.64277	6.66057	6.67983	6.67584
SORT1	sortilin 1	6272	HGNC:11186|MIM:602458|Ensembl:ENSG00000134243|HPRD:03910|Vega:OTTHUMG00000011999	Gp95|LDLCQ6|NT3	NM_002959	GGTCCCCATGTGCCTGTTGTTCAGCCCTCTCTCTTGTTCCCTTTCTGAGC	chr1	109852187	109940563	-	N	N	N	N	II1	e0	-4.95	-3.8	1.15	-0.0858343	0.203505	0.0560681	0.599274	0.0933205	0.800362	8.40307	8.31723	8.60657	8.45914
PSMA5	proteasome (prosome, macropain) subunit, alpha type, 5	5686	HGNC:9534|MIM:176844|Ensembl:ENSG00000143106|HPRD:01464|Vega:OTTHUMG00000012001	PSC5|ZETA	NM_001199774	GGAGAAGCTGAATGCAACAAACATTGAGCTAGCCACAGTGCAGCCTGGCC	chr1	109941652	109969108	-	N	N	N	N	II1	e0	-7.44	-8.05	-0.61	-0.0421251	0.0866301	0.0512581	0.837686	0.587718	0.816908	12.06	12.0179	12.1466	12.1112
SYPL2	synaptophysin-like 2	284612	HGNC:27638|Ensembl:ENSG00000143028|HPRD:17478|Vega:OTTHUMG00000010969	MG29	NM_001040709	AGGGCTGGGCAGGGCCAAGTGCCTCATAGGACTCATGTTCTCTCCAACCA	chr1	110009099	110024764	+	N	N	N	N	II1	e0	-7.7	-6	1.7	-0.0483683	-0.0418745	-0.0917022	0.759634	0.796427	0.490839	6.78257	6.7342	6.74069	6.69087
ATXN7L2	ataxin 7-like 2	127002	HGNC:28713|Ensembl:ENSG00000162650|HPRD:12506|Vega:OTTHUMG00000011027	-	NM_153340	GTCAAAAGCCCATTAACGAGAAAGTGCCTGCCCACTGCAACGGAGCCGCC	chr1	110026560	110035420	+	N	N	N	N	II1	e0	-7.33	-2.44	4.89	0.46513	0.239957	0.101868	0.000140336	0.0214101	0.462907	7.96574	8.43087	8.20569	8.0676
CYB561D1	cytochrome b561 family, member D1	284613	HGNC:26804|Ensembl:ENSG00000174151|HPRD:09902|Vega:OTTHUMG00000011051	-	NM_001134402	GAGCAGGGAGGCTTCTGGTAGTGCTCTTGATGCTCCTGTGTCTGGTTGGC	chr1	110036657	110043063	+	N	N	N	N	II1	e1	-7.73	-6.3	1.43	0.596637	0.560054	0.28983	0.0134133	0.0208693	0.322499	8.69942	9.29605	9.25947	8.98925
AMIGO1	adhesion molecule with Ig-like domain 1	57463	HGNC:20824|Ensembl:ENSG00000181754|HPRD:11129|Vega:OTTHUMG00000011653	AMIGO|AMIGO-1	NM_020703	GTCTGAGTTGGATGGGAATGAGGAAGGAGTGAGGGGAAGAACAGATTCCC	chr1	110049445	110052336	-	N	N	N	N	II1	e0	-5.56	-5.82	-0.26	0.0173765	0.0912797	0.00729821	0.953397	0.66064	0.983955	6.92042	6.93779	7.0117	6.92772
GPR61	G protein-coupled receptor 61	83873	HGNC:13300|MIM:606916|Ensembl:ENSG00000156097|HPRD:06077|Vega:OTTHUMG00000011633	BALGR|GPCR3	NM_031936	TGCAGCACTGGGTTGGAGAGAGGGCACGGGAGTTGGTCTTGGCTGTTCAT	chr1	110082493	110088455	+	N	N	N	N	II1	e0	-3.88	-6.97	-3.09	0.0439087	0.103252	-0.0941765	0.822555	0.464843	0.557891	6.86118	6.90509	6.96443	6.767
GNAI3	guanine nucleotide binding protein (G protein), alpha inhibiting activity polypeptide 3	2773	HGNC:4387|MIM:139370|HPRD:00765	87U6|ARCND1	NM_006496	GGCGATTGATTCAGTGCCCACAATGTAAACAGGGTTGGTAGTTGTTACTC	chr1	110091185	110138454	+	N	N	N	N	II1	e0	-5.11	-4.16	0.95	0.124128	-0.146113	0.0532369	0.437788	0.332079	0.834378	7.96109	8.08522	7.81498	8.01433
MIR197	microRNA 197	406974	HGNC:31569|MIM:611189|Ensembl:ENSG00000207709|miRBase:MI0000239	MIRN197|miR-197|miRNA197	NR_029583	AGTGGGAGGTAAGAGCTCTTCACCCTTCACCACCTTCTCCACCCAGCATG	chr1	110141514	110141589	+	N	N	N	N	II1	e0	-7.1	0.81	7.91	0.0520117	0.0647088	0.0225895	0.820354	0.757079	0.941761	6.73901	6.79102	6.80372	6.7616
GNAT2	guanine nucleotide binding protein (G protein), alpha transducing activity polypeptide 2	2780	HGNC:4394|MIM:139340|Ensembl:ENSG00000134183|HPRD:00762|Vega:OTTHUMG00000011639	ACHM4|GNATC	NM_005272	AAGAAAACCTCAAGGACTGCGGCCTCTTCTAATCCTCACCATTCCTCAGG	chr1	110145888	110155705	-	N	N	N	N	II1	e0	-6.97	-5.13	1.84	0.0619747	-0.0301642	0.0449265	0.692391	0.874985	0.824955	6.73889	6.80087	6.70873	6.78382
AMPD2	adenosine monophosphate deaminase 2	271	HGNC:469|MIM:102771|Ensembl:ENSG00000116337|HPRD:11808|Vega:OTTHUMG00000011649	-	NM_001257361	CCCTCAGGACCCGGGCTTTCTGCTGTACAGACTTCTCGTGGGCAGCCTCC	chr1	110166609	110174677	+	N	N	N	N	II1	e0	-9.16	-6.31	2.85	0.00949506	-0.0258755	-0.0553239	0.968125	0.898918	0.777911	6.73788	6.74738	6.71201	6.68256
GSTM4	glutathione S-transferase mu 4	2948	HGNC:4636|MIM:138333|Ensembl:ENSG00000168765|HPRD:00706|Vega:OTTHUMG00000011642	GSTM4-4|GTM4	NM_000850	CTGCTCCGTGCCTCCCGCGCCTGTTGGTTGGAAGTGACGACCTTGAAGAT	chr1	110198697	110204331	+	N	N	N	N	II1	e0	-8.82	-9.53	-0.71	-0.203555	-0.0297356	-0.0890354	0.158854	0.910591	0.691337	7.68155	7.47799	7.65181	7.59251
GSTM2	glutathione S-transferase mu 2 (muscle)	2946	HGNC:4634|MIM:138380|Ensembl:ENSG00000213366|HPRD:00710|Vega:OTTHUMG00000011638	GST4|GSTM|GSTM2-2|GTHMUS	NM_001142368	ATGTCCTTGAGAGAAACCAAGTATTTGAGCCCAGCTGCCTGGATGCCTTC	chr1	110210643	110226619	+	N	N	N	N	II1	e0	-4.41	-6.8	-2.39	-0.0850637	-0.300463	-0.211353	0.583269	0.00937616	0.0742232	7.09756	7.01249	6.7971	6.8862
GSTM1	glutathione S-transferase mu 1	2944	HGNC:4632|MIM:138350|Ensembl:ENSG00000134184|HPRD:00707|Vega:OTTHUMG00000011635	GST1|GSTM1-1|GSTM1a-1a|GSTM1b-1b|GTH4|GTM1|H-B|MU|MU-1	NM_000561	GTAGATTTTCTCGTCTATGATGTCCTTGACCTCCACCGTATATTTGAGCC	chr1	110230417	110236367	+	N	N	N	N	II1	e2	-7.22	-7.37	-0.15	-0.599872	-0.575328	-0.617014	0.00763328	0.0105983	0.0073419	9.12033	8.52046	8.545	8.50331
GSTM5	glutathione S-transferase mu 5	2949	HGNC:4637|MIM:138385|Ensembl:ENSG00000134201|HPRD:00711|Vega:OTTHUMG00000011644	GSTM5-5|GTM5	NM_000851	GAAAGGTGCTCTGTGCCAAGTTCCTCACTCATTCGCGCTCCTGTAGGCCG	chr1	110254863	110260890	+	N	N	N	N	II1	e0	-7.56	-4.08	3.48	0.0708973	-0.0780154	0.0458496	0.680261	0.641507	0.841155	6.77781	6.84871	6.69979	6.82366
GSTM3	glutathione S-transferase mu 3 (brain)	2947	HGNC:4635|MIM:138390|Ensembl:ENSG00000134202|HPRD:00712	GST5|GSTB|GSTM3-3|GTM3	NM_000849	GACACAGAACACAGACGCCTTACTGGCAACCTGCTTTCAAGACCCCTGTC	chr1	110276553	110283660	-	N	N	N	N	II1	e0	-7.03	-6.74	0.29	-0.271187	-0.180184	-0.255269	0.0153604	0.121903	0.0254592	7.10341	6.83222	6.92322	6.84814
EPS8L3	EPS8-like 3	79574	HGNC:21297|MIM:614989|Ensembl:ENSG00000198758|HPRD:13277|Vega:OTTHUMG00000011651	EPS8R3	NM_139053	GCAGCAAACCCCACACCCCAGCTCACACAGCAAAAACAATGGACAGGCCC	chr1	110292701	110306644	-	N	N	N	N	II1	e0	-6.47	-6.02	0.45	0.00295646	-0.0343266	-0.0696624	0.987499	0.822996	0.604088	6.69562	6.69857	6.66129	6.62596
CSF1	colony stimulating factor 1 (macrophage)	1435	HGNC:2432|MIM:120420|Ensembl:ENSG00000184371|HPRD:00388|Vega:OTTHUMG00000011646	CSF-1|MCSF	NM_172212	GTCATCTCCGTAGCCCTCCCAGTTGTGCCTCCTGCACATTGATGAGTGCC	chr1	110453232	110469365	+	N	N	N	N	II1	e0	-9.85	-5.93	3.92	0.07396	0.152287	0.135153	0.552075	0.115818	0.196817	6.66507	6.73903	6.81735	6.80022
AHCYL1	adenosylhomocysteinase-like 1	10768	HGNC:344|MIM:607826|Ensembl:ENSG00000168710|HPRD:07613|Vega:OTTHUMG00000011652	DCAL|IRBIT|PRO0233|XPVKONA	NM_006621	CCCGGCAGGTAGGTTAGATGTGGGTGGTGCATGTTAATTTCCCTTAGAAG	chr1	110527386	110566364	+	N	N	N	N	II1	e0	-6.18	-5.66	0.52	-0.0166854	0.0180445	0.0219938	0.968228	0.964998	0.962184	10.2787	10.262	10.2967	10.3007
STRIP1	striatin interacting protein 1	85369	HGNC:25916|Ensembl:ENSG00000143093|Vega:OTTHUMG00000170607	FAM40A|FAR11A	NM_033088	TAGGATTAGGGCCAGGGCCAGAAAGTCGGTATCTTGGTTGTGCTCTGGGG	chr1	110577222	110597263	+	N	N	N	N	II1	e0	-7.12	-5.73	1.39	0.031652	0.0403075	0.0164142	0.915776	0.884609	0.964063	7.96394	7.99559	8.00424	7.98035
ALX3	ALX homeobox 3	257	HGNC:449|MIM:606014|HPRD:16190	FND1	NM_006492	CTCTTCCTACCACAAACTGAGTCCCCTCACCTGAACTCTGGGCTGGAGGC	chr1	110602996	110613322	-	N	N	N	N	II1	e0	-6.46	-3.53	2.93	-0.0686698	-0.162571	-0.0726591	0.663937	0.152725	0.674207	6.81675	6.74808	6.65418	6.7441
UBL4B	ubiquitin-like 4B	164153	HGNC:32309|MIM:611127|Ensembl:ENSG00000186150|HPRD:17314|Vega:OTTHUMG00000166989	-	NM_203412	TCAGCAAAGTCATACACTCCCTGTGGCCAGCGTGAACAGAGCCATGCCCC	chr1	110655061	110656569	+	N	N	N	N	II1	e0	-9.77	-3.39	6.38	0.0838565	-0.0859633	0.045524	0.558112	0.552696	0.827481	6.75908	6.84294	6.67312	6.80461
SLC6A17	solute carrier family 6 (neutral amino acid transporter), member 17	388662	HGNC:31399|MIM:610299|Ensembl:ENSG00000197106|HPRD:18061|Vega:OTTHUMG00000011761	NTT4	NM_001010898	TCCTTCAAATAGGCCCTGAGATGTGAGGTCTGCTGCTTCACTGGGGCCCG	chr1	110693131	110744823	+	N	N	N	N	II1	e0	-5.01	-3.62	1.39	-0.0170624	0.0146348	-0.0777533	0.942735	0.951756	0.67255	6.88085	6.86379	6.89549	6.8031
KCNC4	potassium voltage-gated channel, Shaw-related subfamily, member 4	3749	HGNC:6236|MIM:176265|Ensembl:ENSG00000116396|HPRD:08887|Vega:OTTHUMG00000011037	C1orf30|HKSHIIIC|KSHIIIC|KV3.4	NM_004978	TGAGCCACAGGCCACATCAGGAACTTTCCCCACTGCCTCCATGCAAGGCT	chr1	110753335	110776674	+	N	N	N	N	II1	e0	-5.49	-6.1	-0.61	-0.0845029	-0.0605339	-0.0145678	0.53317	0.698492	0.953506	6.78219	6.69769	6.72166	6.76762
RBM15	RNA binding motif protein 15	64783	HGNC:14959|MIM:606077|Ensembl:ENSG00000162775|HPRD:05832|Vega:OTTHUMG00000011284	OTT|OTT1|SPEN	NM_022768	GGCTCACACAGCTTAAGAGTAGCTGTCTCTCAAACGTGCGCTCACAGTTG	chr1	110881944	110889303	+	N	N	N	N	II1	e0	-8.86	-7.29	1.57	0.239957	0.00174596	0.0422118	0.0782357	0.994325	0.883675	9.23105	9.471	9.23279	9.27326
SLC16A4	solute carrier family 16, member 4	9122	HGNC:10925|MIM:603878|Ensembl:ENSG00000168679|HPRD:04855|Vega:OTTHUMG00000011285	MCT4|MCT5	NM_001201546	GCCAGTTTCTTTGCTGGGATGGCTGTCCTTTCTGGACCACCTATAGCAGG	chr1	110905472	110933704	-	N	N	N	N	II1	e0	-6.11	-5.27	0.84	0.0586845	0.322958	0.238343	0.742044	0.00524136	0.0383847	6.83981	6.8985	7.16277	7.07816
LAMTOR5	late endosomal/lysosomal adaptor, MAPK and MTOR activator 5	10542	HGNC:17955|MIM:608521|Ensembl:ENSG00000134248|HPRD:09773|Vega:OTTHUMG00000011568	HBXIP|XIP	NM_006402	ATGATCCAGAAACACGATGGCATCACGGTGGCAGTGCACAAAATGGCCTC	chr1	110943876	110950546	-	N	N	N	N	II1	e0	-7.25	-6.44	0.81	-0.175415	-0.131944	-0.122765	0.336929	0.52873	0.602119	11.3619	11.1865	11.2299	11.2391
PROK1	prokineticin 1	84432	HGNC:18454|MIM:606233|Ensembl:ENSG00000143125|HPRD:06946|Vega:OTTHUMG00000011569	EGVEGF|PK1|PRK1	NM_032414	TCCAAGGATCAGCCCTGAGAGCAGGTTGGTGACTTTGAGGAGGGCAGTCC	chr1	110993787	110999976	+	N	N	N	N	II1	e0	-7.02	-9.17	-2.15	-0.19448	-0.300213	-0.325233	0.338324	0.0947403	0.074218	7.44921	7.25473	7.149	7.12398
CYMP	chymosin pseudogene	643160	HGNC:2588|MIM:118943|Ensembl:ENSG00000240194	-	NR_003599	CGCCTGAGCAGCATTCCCACGGCTGTCTTCGAGATCCACGGCAAGAAGTA	chr1	111023387	111033891	+	N	N	N	N	II1	e0	-3.52	-1.63	1.89	0.040033	-0.0916142	-0.0237657	0.809462	0.446295	0.911607	6.79762	6.83765	6.706	6.77385
KCNA10	potassium voltage-gated channel, shaker-related subfamily, member 10	3744	HGNC:6219|MIM:602420|Ensembl:ENSG00000143105|HPRD:03882|Vega:OTTHUMG00000022785	Kcn1|Kv1.8	NM_005549	CCAATGGTGGCTGTTCCACAGAGAAGTCTAGGAAATGATCAGTCCAGGGC	chr1	111059838	111061797	-	N	N	N	N	II1	e0	0.11	-3.41	-3.52	-0.0109259	0.0921227	-0.000649193	0.970248	0.619523	0.997948	6.7942	6.78327	6.88632	6.79355
KCNA2	potassium voltage-gated channel, shaker-related subfamily, member 2	3737	HGNC:6220|MIM:176262|Ensembl:ENSG00000177301|HPRD:01443|Vega:OTTHUMG00000011567	HBK5|HK4|HUKIV|KV1.2|MK2|NGK1|RBK2	NM_001204269	GCTGTCCAAAGATCCCATCCTCCCCTGACCTAAAGAAAAGTAGAAGTGCC	chr1	111136201	111174096	-	N	N	N	N	II1	e0	-6.07	-6.51	-0.44	-0.123207	-0.0827485	-0.127081	0.299013	0.560471	0.315057	6.86531	6.7421	6.78256	6.73823
KCNA3	potassium voltage-gated channel, shaker-related subfamily, member 3	3738	HGNC:6221|MIM:176263|Ensembl:ENSG00000177272|HPRD:15937|Vega:OTTHUMG00000034493	HGK5|HLK3|HPCN3|HUKIII|KV1.3|MK3|PCN3	NM_002232	CTTCGGCAGTATCACAAGAAGATTAAAGTGGCAGACACCCCTTCCAGCGG	chr1	111215073	111217655	-	N	N	N	N	II1	e0	-8.69	-4.46	4.23	-0.143614	-0.107119	-0.0689251	0.133969	0.312675	0.624351	6.79868	6.65507	6.69156	6.72975
CD53	CD53 molecule	963	HGNC:1686|MIM:151525|Ensembl:ENSG00000143119|HPRD:01054|Vega:OTTHUMG00000048020	MOX44|TSPAN25	NM_001040033	CCCCAAAGTCAAGCAAGAGACTAGTTGAAGGGAGTTCTGGGGCCAGGCTC	chr1	111413820	111442558	+	N	N	N	N	II1	e0	-4.49	-6.81	-2.32	-0.15502	0.25354	0.272187	0.288265	0.0520437	0.0399939	9.41948	9.26446	9.67302	9.69167
LRIF1	ligand dependent nuclear receptor interacting factor 1	55791	HGNC:30299|MIM:615354|Ensembl:ENSG00000121931|HPRD:17975|Vega:OTTHUMG00000011913	C1orf103|RIF1|RP11-96K19.1	NM_018372	CCCAGCTTGCTTCCATGGCCAATCTAAGGGCAGAGAAGAATAAAGTGGAG	chr1	111489811	111506566	-	N	N	N	N	II1	e0	-4.23	-2.84	1.39	0.0349276	0.163322	0.243654	0.914691	0.409596	0.176186	6.90441	6.93934	7.06773	7.14806
DRAM2	DNA-damage regulated autophagy modulator 2	128338	HGNC:28769|MIM:613360|Ensembl:ENSG00000156171|HPRD:14685|Vega:OTTHUMG00000011911	PRO180|RP5-1180E21.1|TMEM77|WWFQ154	NM_178454	GAAAGTAGACCTGGATTCATGTGGGCTCTTCCATGGCTTAAGTGTTGCCC	chr1	111659953	111682838	-	N	N	N	N	II1	e0	-4.98	-4.89	0.09	-0.321055	-0.191345	-0.15602	0.0805399	0.378667	0.545885	7.95424	7.63319	7.7629	7.79822
CEPT1	choline/ethanolamine phosphotransferase 1	10390	HGNC:24289|Ensembl:ENSG00000134255|HPRD:13024|Vega:OTTHUMG00000012357	-	NM_006090	GGAATTCAGCTTGTGACACAGATACATCCCACTAGCTTGTGAGGTGGAAC	chr1	111682832	111727724	+	N	N	N	N	II1	e0	-6.82	-6.44	0.38	-0.278982	0.201466	0.0569299	0.0516965	0.191332	0.841112	9.36739	9.08841	9.56885	9.42432
DENND2D	DENN/MADD domain containing 2D	79961	HGNC:26192|MIM:615111|HPRD:08655	-	NM_001271833	CCCTGGTATTGATTTCTCAGGACTTTGGAGGGCTCTGACACCATGCTCAC	chr1	111728590	111747160	-	N	N	N	N	II1	e0	-7.71	-4.62	3.09	-0.147179	0.252408	0.462951	0.264729	0.0341233	0.000506791	7.37292	7.22574	7.62533	7.83587
CHI3L2	chitinase 3-like 2	1117	HGNC:1933|MIM:601526|Ensembl:ENSG00000064886|HPRD:03315|Vega:OTTHUMG00000012174	CHIL2|YKL-39|YKL39	NM_001025197	CCTTACCCTCTTGTCCAAGCAGTCAAGAGAAGCCTTGGCTCCCTGTGAAG	chr1	111770280	111786062	+	N	N	N	N	II1	e2	-7.46	-7.3	0.16	-0.988695	0.334242	0.243729	4.38746e-06	0.0303022	0.143796	11.5541	10.5654	11.8883	11.7978
CHIAP2	chitinase, acidic pseudogene 2	149620	HGNC:44463|Ensembl:ENSG00000203878|HPRD:12595	-	NR_003928	GTGGCCTGTACCCTGACCCCACTGACAAGAATGCCTCCTACAGTTGTGTG	chr1	111823145	111828730	+	N	N	N	N	II1	e0	-4.12	-2.33	1.79	-0.138819	-0.0912444	-0.0489621	0.223769	0.504073	0.804994	6.90445	6.76563	6.8132	6.85548
CHIA	chitinase, acidic	27159	HGNC:17432|MIM:606080|Ensembl:ENSG00000134216|HPRD:09355|Vega:OTTHUMG00000011165	AMCASE|CHIT2|TSA1902	NM_021797	TGCACGGCTCCAGCTCAGCCCATTGAGCCAATAACTGCTGCTCCCAGTGG	chr1	111833473	111863188	+	N	N	N	N	II1	e0	-1.55	-1.56	-0.01	-0.0502304	-0.102758	-0.0119332	0.742009	0.369347	0.959301	6.66884	6.61861	6.56608	6.65691
PIFO	primary cilia formation	128344	HGNC:27009|MIM:614234|Ensembl:ENSG00000173947|HPRD:14040|Vega:OTTHUMG00000011168	C1orf88|pitchfork	NM_181643	GCTTCAAGTTCTTAGGTCCCTTTGGAGGATATTGATGGGGGTGGAGGTGG	chr1	111889194	111895639	+	N	N	N	N	II1	e0	-0.6	-5.27	-4.67	0.0355455	-0.150178	0.0458852	0.904391	0.406804	0.885888	6.91336	6.94891	6.76319	6.95925
OVGP1	oviductal glycoprotein 1, 120kDa	5016	HGNC:8524|MIM:603578|Ensembl:ENSG00000085465|HPRD:04658|Vega:OTTHUMG00000011746	CHIT5|EGP|MUC9|OGP	NM_002557	CTTCTCATCCCGGGGCAAAGCAGGCATCAAAACCAGAATAGGCCAATCTC	chr1	111956936	111970399	-	N	N	N	N	II1	e0	-3.94	1.29	5.23	0.235356	-0.0292604	-0.220481	0.191155	0.931999	0.263116	7.51956	7.75492	7.4903	7.29908
WDR77	WD repeat domain 77	79084	HGNC:29652|MIM:611734|Ensembl:ENSG00000116455|HPRD:14387|Vega:OTTHUMG00000011748	MEP-50|MEP50|Nbla10071|RP11-552M11.3|p44|p44/Mep50	NM_024102	AAAAAGTTTGGCTTGCCTGTGTAATGCCCACTCCCTTCCCCCTGGCTCCC	chr1	111982511	111991830	-	N	N	N	N	II1	e0	-4.91	-6.22	-1.31	0.22241	0.181756	0.0470158	0.186066	0.31734	0.889687	8.83334	9.05575	9.01509	8.88035
ATP5F1	ATP synthase, H+ transporting, mitochondrial Fo complex, subunit B1	515	HGNC:840|MIM:603270|HPRD:04467	PIG47	NM_001688	GTACCACCTCTTCCTGAATACGGAGGAAAAGTTCGTTATGGACTGATCCC	chr1	111991742	112004525	+	N	N	N	N	II1	e0	-4.56	-7.16	-2.6	-0.0776052	0.105251	0.175328	0.747648	0.626616	0.348377	10.4748	10.3972	10.58	10.6501
C1orf162	chromosome 1 open reading frame 162	128346	HGNC:28344|Ensembl:ENSG00000143110|HPRD:14495|Vega:OTTHUMG00000011750	-	NM_174896	CCCTTGGGGGCATAGACTGCCTTCCTTGGACCCTTCCAAAGTGTGTGGTA	chr1	112016603	112021134	+	N	N	N	N	II1	e0	-4.76	-4.92	-0.16	-0.0129595	-0.0758334	0.0228423	0.966738	0.728249	0.944767	7.21356	7.2006	7.13773	7.2364
ADORA3	adenosine A3 receptor	140	HGNC:268|MIM:600445|Ensembl:ENSG00000121933|HPRD:08984|HPRD:12424|Vega:OTTHUMG00000011957	A3AR|AD026|bA552M11.5	NM_001081976	GTAGTCAGAGGAGCTATGATAGACCACACCCAAGCAAGGCTGCCCTCAAA	chr1	112025969	112106597	-	N	N	N	N	II1	e0	-5.8	-4.11	1.69	-0.0528022	0.109627	0.0259727	0.794999	0.474928	0.923565	6.76314	6.71034	6.87277	6.78911
LINC01160	uncharacterized LOC100129269	100129269	-	-	NR_034126	GGCCAGTGTTTTAATTAATCATGTGGCCAGGCGTGGTGGCTCACGCCTGT	chr1	112141628	112150940	-	N	N	N	N	II1	e0	-6.42	-6.8	-0.38	-0.0842828	-0.293434	-0.243665	0.781405	0.123102	0.250765	9.46293	9.37865	9.1695	9.21927
RAP1A	RAP1A, member of RAS oncogene family	5906	HGNC:9855|MIM:179520|Ensembl:ENSG00000116473|HPRD:01545	KREV-1|KREV1|RAP1|SMGP21	NM_001010935	GGTGATTACCCTGTGTATAAGAGTATGTGTCTCACTGCACCTTCAATGGC	chr1	112162404	112256101	+	N	N	N	N	II1	e0	-4.26	-5.29	-1.03	0.116506	0.224862	0.159655	0.484355	0.0945585	0.313391	7.14281	7.25932	7.36767	7.30246
FAM212B	family with sequence similarity 212, member B	55924	HGNC:28045|Ensembl:ENSG00000197852|HPRD:14246|Vega:OTTHUMG00000011953	C1orf183	NM_198926	CTGCCCAGACACACAAAAAATGTGGCCTGAGGAAAGCCCCAAGAGGGAGG	chr1	112264685	112298419	-	N	N	N	N	II1	e0	-6.44	-6.88	-0.44	-0.0167333	0.0425925	0.0477649	0.944156	0.831744	0.834023	6.80881	6.79207	6.8514	6.85657
DDX20	DEAD (Asp-Glu-Ala-Asp) box polypeptide 20	11218	HGNC:2743|MIM:606168|Ensembl:ENSG00000064703|HPRD:05859|Vega:OTTHUMG00000011956	DP103|GEMIN3	NM_007204	GAGGCTGTGAAAGCTGTCCACATTTTTGCTGTGTATTAAATAGCTGTGGG	chr1	112298189	112310199	+	N	N	N	N	II1	e0	-5.79	-6.29	-0.5	0.0573239	-0.0249262	0.141506	0.772841	0.915954	0.342096	6.98564	7.04296	6.96071	7.12714
KCND3	potassium voltage-gated channel, Shal-related subfamily, member 3	3752	HGNC:6239|MIM:605411|Ensembl:ENSG00000171385|HPRD:16104|Vega:OTTHUMG00000011989	KCND3L|KCND3S|KSHIVB|KV4.3	NM_172198	CTCCCCCCTTTCCCCACTATTTCTGCCTGCCCCATTGTACCCCTAGCACT	chr1	112318453	112531777	-	N	N	N	N	II1	e0	-4.62	-3.41	1.21	0.0405566	0.114486	0.11451	0.854591	0.447363	0.483957	6.76801	6.80856	6.88249	6.88252
LOC643355	uncharacterized LOC643355	643355	-	-	NM_001270945	ACGCTAGGCACACCAGCTTGGACTCAGAATGGGGCTGGTCTGGGGGCAGA	chr1	112533189	112541463	+	N	N	N	N	II1	e0	-8.08	-4.08	4	0.0468513	0.150308	0.0818296	0.78755	0.174194	0.595814	6.80269	6.84954	6.953	6.88452
CTTNBP2NL	CTTNBP2 N-terminal like	55917	HGNC:25330|MIM:615100|Ensembl:ENSG00000143079|HPRD:10906|Vega:OTTHUMG00000011154	-	NM_018704	GCGGACAAAAGCCTCCAAACTTTCCAACTGTGTAGGCCAGTACAGCTGGC	chr1	112938799	113003786	+	N	N	N	N	II1	e0	-2.77	-3.82	-1.05	-0.0223485	0.0539616	0.0542774	0.901888	0.694528	0.726577	6.79052	6.76817	6.84448	6.8448
WNT2B	wingless-type MMTV integration site family, member 2B	7482	HGNC:12781|MIM:601968|Ensembl:ENSG00000134245|HPRD:03574|Vega:OTTHUMG00000011157	WNT13|XWNT2	NM_004185	GGACAGCACTGCCTCTTTTGCTTACTTGCTGCCTGTTCAAACTGAGGTGG	chr1	113010039	113063910	+	N	N	N	N	II1	e0	-5.98	-4.42	1.56	-0.0609087	-0.0779526	-0.127106	0.727126	0.626643	0.363888	6.86608	6.80517	6.78813	6.73898
ST7L	suppression of tumorigenicity 7 like	54879	HGNC:18441|Ensembl:ENSG00000007341|HPRD:18112|Vega:OTTHUMG00000011753	FAM4B|ST7R|STLR	NM_138728	CAGCCTCCAGAAGAGGATTAAGCACAGCAGAAATTAATGCCGTGGAAGCA	chr1	113066140	113162040	-	N	N	N	N	II1	e0	-2.74	-3.15	-0.41	-0.0505367	-0.0865667	-0.032009	0.784377	0.568163	0.894054	6.82544	6.7749	6.73887	6.79343
CAPZA1	capping protein (actin filament) muscle Z-line, alpha 1	829	HGNC:1488|MIM:601580|Ensembl:ENSG00000116489|HPRD:03347|Vega:OTTHUMG00000011769	CAPPA1|CAPZ|CAZ1	NM_006135	AAACGCCGACCAAGAGGGCCCCATGTCAGTTATGCGCGGGAGTGACGTCT	chr1	113162074	113214241	+	N	N	N	N	II1	e0	-7.6	-6.33	1.27	0.0702832	0.0197956	0.0754434	0.720803	0.939876	0.72655	6.75392	6.82421	6.77372	6.82937
MOV10	Mov10, Moloney leukemia virus 10, homolog (mouse)	4343	HGNC:7200|MIM:610742|Ensembl:ENSG00000155363|HPRD:14732|Vega:OTTHUMG00000011906	fSAP113|gb110	NM_001286072	AGCTCTGAAGACACAGCACCCAGCCTTCTCGCACCAGCCAAGCCTTAACT	chr1	113216933	113243368	+	N	N	N	N	II1	e0	-7.21	-6.99	0.22	-0.478669	-0.301199	-0.147235	0.00961468	0.11371	0.58514	8.71727	8.2386	8.41607	8.57003
RHOC	ras homolog family member C	389	HGNC:669|MIM:165380|Ensembl:ENSG00000155366|HPRD:01322|Vega:OTTHUMG00000011905	ARH9|ARHC|H9|RHOH9	NM_001042679	GGAGTTGTTTTCGGCAGGGGCCTTGTCTCTCACTGCATTTGGTCAGGGGG	chr1	113243748	113249678	-	N	N	N	N	II1	e0	-10.79	-8.62	2.17	-0.29127	0.303121	0.267138	0.282383	0.260183	0.381628	9.78364	9.49237	10.0868	10.0508
PPM1J	protein phosphatase, Mg2+/Mn2+ dependent, 1J	333926	HGNC:20785|MIM:609957|Ensembl:ENSG00000155367|HPRD:15171|Vega:OTTHUMG00000012019	PP2CZ|PP2Czeta|PPP2CZ	NM_005167	TCTCCCCAACAACAAGCTGGGTTCCGGGGATGACATCTCTGTCTTCGTCA	chr1	113252615	113257950	-	N	N	N	N	II1	e0	-10.05	-5.66	4.39	0.139848	0.0538378	0.0174629	0.509112	0.853985	0.965228	6.66897	6.80881	6.7228	6.68643
FAM19A3	family with sequence similarity 19 (chemokine (C-C motif)-like), member A3	284467	HGNC:21590|Ensembl:ENSG00000184599|HPRD:16877|Vega:OTTHUMG00000012020	TAFA-3|TAFA3	NM_182759	GGAAAACACTCTCCCCTTATGCCAGACCAGCAGTATCTCATTTGGATGGG	chr1	113263188	113269856	+	N	N	N	N	II1	e0	-6.65	-8.13	-1.48	0.123807	-0.0219075	-0.0329654	0.456304	0.936591	0.911407	6.85699	6.98079	6.83508	6.82402
SLC16A1	solute carrier family 16 (monocarboxylate transporter), member 1	6566	HGNC:10922|MIM:600682|Ensembl:ENSG00000155380|HPRD:02816|Vega:OTTHUMG00000012129	HHF7|MCT|MCT1	NM_001166496	GGCACCAGGCAAACGAATAAAGATAGGATTGGGAAAGAAGTTGCTAAGTG	chr1	113454469	113498685	-	N	N	N	N	II1	e0	-6.39	-6.39	0	-0.0115599	-0.209056	-0.0957322	0.953775	0.0287157	0.446777	6.86582	6.85426	6.65676	6.77008
AKR7A2P1	aldo-keto reductase family 7, member A2 pseudogene 1	246182	HGNC:24062	AFARP1	NR_002796	CAGTAAAGTCACCACCAAGTGAAGAATGAAACCTCCTGGGGTGCTGTGTG	chr1	113465971	113467295	+	N	N	N	N	II1	e0	-3.97	-6.35	-2.38	0.0450433	0.0981736	0.126044	0.782345	0.412768	0.27529	6.85017	6.89522	6.94835	6.97622
LRIG2	leucine-rich repeats and immunoglobulin-like domains 2	9860	HGNC:20889|MIM:608869|Ensembl:ENSG00000198799|HPRD:12321|Vega:OTTHUMG00000012133	LIG-2|LIG2|UFS2	NM_014813	GTGTGCCTGGGATTCTTCAGTGGTTTCAGGCAGATAGTTGAGACTGGGGC	chr1	113615830	113667342	+	N	N	N	N	II1	e0	-2.45	-4.98	-2.53	-0.0690834	-0.0351147	-0.235528	0.715604	0.876572	0.0642283	7.55058	7.4815	7.51546	7.31505
LOC643441	uncharacterized LOC643441	643441	-	-	NR_038846	CATGGGTGAGGCAGCTGCTCAGAAACAAATGTCTTTCAACAATTACCCCC	chr1	113739403	113748875	-	N	N	N	N	II1	e0	-2.08	-3.67	-1.59	0.0883155	0.100532	0.0476862	0.497128	0.41866	0.802898	6.75634	6.84465	6.85687	6.80402
MAGI3	membrane associated guanylate kinase, WW and PDZ domain containing 3	260425	HGNC:29647|Ensembl:ENSG00000081026|HPRD:11290|Vega:OTTHUMG00000011737	MAGI-3|RP4-730K3.1|dJ730K3.2	NM_001142782	CATGGTTTGGCTCCTTCCGGTCTGTGCTCCTACGTGAAACCCGAGCAACA	chr1	113933474	114228545	+	Y	Y	Y	N	PI1	e0	1.93	-0.5	-2.43	-0.081627	-0.120268	-0.049436	0.575803	0.338018	0.809287	6.79208	6.71046	6.67182	6.74265
PHTF1	putative homeodomain transcription factor 1	10745	HGNC:8939|MIM:604950|Ensembl:ENSG00000116793|HPRD:09227|Vega:OTTHUMG00000011800	PHTF	NM_006608	TGAATGGTGTTTCCGGAGGAGCAAGTCCTTTTCCAACTGGGTGTGCATGC	chr1	114239823	114301777	-	N	N	N	N	II1	e0	-2.21	-3.98	-1.77	-0.0414678	-0.0245783	0.159474	0.828217	0.90495	0.188268	7.02361	6.98214	6.99903	7.18308
RSBN1	round spermatid basic protein 1	54665	HGNC:25642|Ensembl:ENSG00000081019|HPRD:08561|Vega:OTTHUMG00000011938	ROSBIN|RP11-324J2.1	NM_018364	ATTTGCCTGGCGGACTATTTGCGTTGTGTGGCCTTAGTTTGTTTATTGAC	chr1	114304453	114355070	-	N	N	N	N	II1	e0	-5.59	-6.75	-1.16	0.115573	0.242563	0.0731109	0.44977	0.0503221	0.72655	8.97498	9.09055	9.21754	9.04809
PTPN22	protein tyrosine phosphatase, non-receptor type 22 (lymphoid)	26191	HGNC:9652|MIM:600716|Ensembl:ENSG00000134242|HPRD:06100|Vega:OTTHUMG00000011936	LYP|LYP1|LYP2|PEP|PTPN8	NM_001193431	ACTAGCAACTGCTCCAAGGATAGATGATGAAATCCCCCCTCCACTTCCTG	chr1	114356432	114414375	-	N	N	N	N	II1	e1	-4.41	-4.73	-0.32	1.10133	0.813537	0.803947	6.37804e-07	1.26848e-05	1.52932e-05	7.93929	9.04062	8.75283	8.74324
BCL2L15	BCL2-like 15	440603	HGNC:33624|HPRD:16920	Bfk|C1orf178	NM_001010922	CCTGCTGGGCTGAAAACTGCTTGTTTCGTGGAAAAGCAAAACTTGACAGC	chr1	114419435	114430169	-	N	N	N	N	II1	e0	-5.89	-5.62	0.27	-0.112074	-0.106156	-0.0490713	0.359911	0.401832	0.803032	6.71021	6.59814	6.60406	6.66114
AP4B1	adaptor-related protein complex 4, beta 1 subunit	10717	HGNC:572|MIM:607245|Ensembl:ENSG00000134262|HPRD:06259|Vega:OTTHUMG00000011943	BETA-4|CPSQ5|SPG47	NM_006594	CGCAATGAGTAGGGCTGGGTCTCGGCCATGGAAAGCATACCTCAGTGCTC	chr1	114437370	114447741	-	N	N	N	N	II1	e0	-3.92	-7.42	-3.5	0.150931	0.269069	0.117415	0.520865	0.158854	0.690229	9.57857	9.7295	9.84764	9.69598
DCLRE1B	DNA cross-link repair 1B	64858	HGNC:17641|MIM:609683|Ensembl:ENSG00000118655|HPRD:16785|Vega:OTTHUMG00000011937	APOLLO|SNM1B|SNMIB	NM_022836	CCTAGGCTCGAATCTGTGGCACCCTGAGCAATTACTTAAATTGTGGAGCC	chr1	114447914	114456708	+	N	N	N	N	II1	e0	-7.01	-7.46	-0.45	-0.19902	-0.219889	-0.0952525	0.18296	0.133956	0.670458	7.33106	7.13204	7.11118	7.23581
HIPK1	homeodomain interacting protein kinase 1	204851	HGNC:19006|MIM:608003|Ensembl:ENSG00000163349|HPRD:06418|Vega:OTTHUMG00000011983	Myak|Nbak2	NM_198269	ACCCACTTATTGCCTAATTAGTCATAGTTTGACAATTGCCCTTGTATTCC	chr1	114493766	114520491	+	N	N	N	N	II1	e0	-6.27	-7.6	-1.33	0.0526257	-0.0291089	0.153316	0.688563	0.852374	0.0985988	6.7329	6.78553	6.70379	6.88622
OLFML3	olfactomedin-like 3	56944	HGNC:24956|MIM:610088|Ensembl:ENSG00000116774|HPRD:14878|Vega:OTTHUMG00000011980	HNOEL-iso|OLF44	NM_020190	AGAGCCCGAAGAGTCAAAACCCTCAATGTTCCCTCCTGCTCTCCTGCCCC	chr1	114522012	114524876	+	N	N	N	N	II1	e0	-6.88	-5.68	1.2	-0.0254362	0.0416103	0.0814834	0.909577	0.828372	0.634204	6.81291	6.78747	6.85452	6.89439
SYT6	synaptotagmin VI	148281	HGNC:18638|MIM:607718|Ensembl:ENSG00000134207|HPRD:09654	sytVI	NM_001270805	GCTTCGACAGTGAGAGCTCGTGCCCATCTCCGAAACCACCTCCAACACCA	chr1	114631913	114696472	-	N	N	N	N	II1	e0	-5.86	-6.04	-0.18	0.0596286	0.0359398	0.0744252	0.70766	0.844447	0.646411	6.6757	6.73532	6.71164	6.75012
TRIM33	tripartite motif containing 33	51592	HGNC:16290|MIM:605769|Ensembl:ENSG00000197323|HPRD:10423|Vega:OTTHUMG00000011891	ECTO|PTC7|RFG7|TF1G|TIF1G|TIF1GAMMA|TIFGAMMA	NM_033020	ACTGGAGTAAACCCACCTTTACCACCCCAATTACAGCACCCGAGGCCGAT	chr1	114935398	115053781	-	N	N	N	N	II1	e1	-4.48	-5.02	-0.54	0.496843	0.539997	0.361862	0.00341016	0.0018921	0.0305279	8.32268	8.81953	8.86268	8.68454
BCAS2	breast carcinoma amplified sequence 2	10286	HGNC:975|MIM:605783|Ensembl:ENSG00000116752|HPRD:05777|Vega:OTTHUMG00000011898	DAM1|SPF27|Snt309	NM_005872	CCATTGATGTTTAAGTGTTTAGAAATCATAGAAGGTGTAGGCTGCTGTGG	chr1	115110180	115124265	-	N	N	N	N	II1	e0	-4.93	-4.55	0.38	-0.0647216	-0.0758749	-0.123969	0.780863	0.729124	0.528806	6.96075	6.89603	6.88488	6.83679
DENND2C	DENN/MADD domain containing 2C	163259	HGNC:24748|HPRD:13425	dJ1156J9.1	NM_198459	TGGGGGTAAAAGGGTTTACTGTGATGGATCCTGGCTATCCCTCTAGGAGG	chr1	115127195	115212732	-	N	Y	N	N	II1	e0	-0.85	-0.99	-0.14	-0.246371	-0.15794	-0.141731	0.163654	0.453334	0.556666	7.33388	7.08751	7.17594	7.19215
AMPD1	adenosine monophosphate deaminase 1	270	HGNC:468|MIM:102770|Ensembl:ENSG00000116748|HPRD:00040|Vega:OTTHUMG00000011892	MAD|MADA	NM_000036	CCGGAGGACAAATGTAGCCCAAATCCGCATGGCCTATCGCTATGAAACCT	chr1	115215719	115238239	-	N	N	N	N	II1	e0	-0.51	-2.69	-2.18	0.0403637	-0.00637218	-0.0397419	0.835041	0.977265	0.859162	6.62957	6.66993	6.62319	6.58982
NRAS	neuroblastoma RAS viral (v-ras) oncogene homolog	4893	HGNC:7989|MIM:164790|Ensembl:ENSG00000213281|HPRD:01273|Vega:OTTHUMG00000012059	ALPS4|N-ras|NRAS1|NS6	NM_002524	GGTTTTCCAGAGGCCTGTTTTGGGGCTTTCCCAGGAGAAAGATGAAACTG	chr1	115247084	115259515	-	N	N	N	N	II1	e0	-5.78	-6.33	-0.55	0.225326	0.0832279	0.318867	0.293284	0.790457	0.114817	8.24322	8.46854	8.32644	8.56208
CSDE1	cold shock domain containing E1, RNA-binding	7812	HGNC:29905|MIM:191510|Ensembl:ENSG00000009307|HPRD:15949|Vega:OTTHUMG00000012060	D1S155E|RP5-1000E10.3|UNR	NM_001242892	GTGTGCGCTGTTCCTCACAACTTAGAGAGTAAATCTCCAGCTGCCCCGGG	chr1	115259533	115300671	-	N	N	N	N	II1	e0	-5.66	-8	-2.34	0.147586	-0.0630961	0.165944	0.326781	0.762876	0.283638	7.74582	7.8934	7.68272	7.91176
SIKE1	suppressor of IKBKE 1	80143	HGNC:26119|MIM:611656|Ensembl:ENSG00000052723|HPRD:07958|Vega:OTTHUMG00000012061	SIKE	NM_001102396	CAGTGGTCAACTGGGTTCACTCATCAACTCATTCCCGTCCCAGTTTACTC	chr1	115312104	115323308	-	N	N	N	N	II1	e0	-5.45	-5.04	0.41	0.127344	0.0354938	0.170779	0.341129	0.864936	0.182133	7.11121	7.23855	7.1467	7.28199
SYCP1	synaptonemal complex protein 1	6847	HGNC:11487|MIM:602162|Ensembl:ENSG00000198765|HPRD:03698|Vega:OTTHUMG00000012057	CT8|HOM-TES-14|SCP-1|SCP1	NM_003176	GCCAGAGCCAAATTTTATCTGGAAGTTGAGACTTAAAAAATACTTGCATG	chr1	115397423	115537990	+	Y	Y	Y	N	PI1	e0	1.66	-0.36	-2.02	-0.117803	-0.0320498	-0.0658182	0.286796	0.854798	0.676119	6.7258	6.608	6.69375	6.65998
TSHB	thyroid stimulating hormone, beta	7252	HGNC:12372|MIM:188540|Ensembl:ENSG00000134200|HPRD:11766	TSH-B|TSH-BETA	NM_001277991	GTTTGGGTCACCACAGCATCTGCTCACCAATGCAAAGTAAGCATGACTGC	chr1	115576566	115576930	+	N	N	N	N	II1	e0	1.3	-1.42	-2.72	-0.0932702	-0.0755797	-0.0509039	0.574501	0.679055	0.832378	6.72613	6.63286	6.65055	6.67523
TSPAN2	tetraspanin 2	10100	HGNC:20659|MIM:613133|Ensembl:ENSG00000134198|HPRD:18233|Vega:OTTHUMG00000011878	NET3|TSN2|TSPAN-2	NM_005725	CTCTCTGCCTGAAGACAGGAAACAGGCCCAAGTGCATACTCGGGTTCTTT	chr1	115590632	115632121	-	N	N	N	N	II1	e0	-6.48	-5.32	1.16	-0.0665382	-0.26842	-0.172492	0.795005	0.0838532	0.363658	7.0004	6.93386	6.73198	6.82791
NGF	nerve growth factor (beta polypeptide)	4803	HGNC:7808|MIM:162030|Ensembl:ENSG00000134259|HPRD:08874|Vega:OTTHUMG00000011880	Beta-NGF|HSAN5|NGFB	NM_002506	GTACCACGACTCACACCTTTGTCAAGGCGCTGACCATGGATGGCAAGCAG	chr1	115828536	115880857	-	N	N	N	N	II1	e0	-4.78	-4.03	0.75	0.0262731	0.0327469	0.0234419	0.938664	0.921743	0.95411	6.68283	6.7091	6.71557	6.70627
VANGL1	VANGL planar cell polarity protein 1	81839	HGNC:15512|MIM:610132|Ensembl:ENSG00000173218|HPRD:18279	KITENIN|LPP2|STB2|STBM2	NM_138959	TCCTTTGACCATCTGCACTTTATTTGGAAGGAAGCAGGGGCTGTCCACCC	chr1	116184573	116240845	+	N	N	N	N	II1	e0	-7.67	-6.24	1.43	-0.342233	-0.498139	-0.429274	0.0274249	0.00235012	0.00775083	7.29203	6.9498	6.79389	6.86276
CASQ2	calsequestrin 2 (cardiac muscle)	845	HGNC:1513|MIM:114251|Ensembl:ENSG00000118729|HPRD:00256|Vega:OTTHUMG00000011970	PDIB2	NM_001232	GATGGGTTCATGTCTCTGATTGGGTCAGCTGGCTTCCTAGCCTAAGCTGG	chr1	116242625	116311426	-	N	N	N	N	II1	e0	-2.42	-2.43	-0.01	0.0407845	0.030332	0.0218955	0.828137	0.877118	0.927639	6.80257	6.84335	6.8329	6.82446
NHLH2	nescient helix loop helix 2	4808	HGNC:7818|MIM:162361|Ensembl:ENSG00000177551|HPRD:01213|Vega:OTTHUMG00000011969	HEN2|NSCL2|bHLHa34	NM_005599	AATCTGGTTTCTATCTGACGAGTTTTTCATATCTCATGAATGGTGCGCTG	chr1	116378998	116383747	-	N	N	N	N	II1	e0	-3.2	-3.31	-0.11	0.00528581	0.0571632	0.0408515	0.980016	0.702327	0.8326	6.60816	6.61345	6.66533	6.64902
SLC22A15	solute carrier family 22, member 15	55356	HGNC:20301|MIM:608275|Ensembl:ENSG00000163393|Vega:OTTHUMG00000012008	FLIPT1|PRO34686	NM_018420	TTGAAGACTAATTGGGAGTCCATCTCTCTATTGGCACTGGGTTCGATTGC	chr1	116519118	116612675	+	Y	Y	N	Y	IP1	e0	0.49	-0.86	-1.35	0.024471	-0.0097185	0.0618143	0.909074	0.966313	0.735789	6.58727	6.61174	6.57755	6.64908
MAB21L3	mab-21-like 3 (C. elegans)	126868	HGNC:26787|Ensembl:ENSG00000173212|HPRD:08245|Vega:OTTHUMG00000012110	C1orf161|RP5-1185H19.1	NM_152367	GTAACTGCATGAAGAAGGTCTGGGGACTCACACAGGAGCTGGGCACTGAG	chr1	116654375	116677861	+	N	N	N	N	II1	e0	-5.09	-7.65	-2.56	-0.021406	-0.0315327	0.0749778	0.920921	0.873078	0.657227	6.86792	6.84652	6.83639	6.9429
ATP1A1	ATPase, Na+/K+ transporting, alpha 1 polypeptide	476	HGNC:799|MIM:182310|Ensembl:ENSG00000163399|HPRD:01662|Vega:OTTHUMG00000012109	-	NM_000701	CGAAGTCAGAAAACTCATCATCAGGCGACGCCCTGGCGGCTGGGTGGAGA	chr1	116915794	116947396	+	N	N	N	N	II1	e0	-6.97	-5.89	1.08	0.214028	-0.0203377	0.258075	0.197155	0.950373	0.118733	9.56126	9.77529	9.54092	9.81934
ATP1A1OS	ATP1A1 opposite strand	84852	HGNC:28262|Ensembl:ENSG00000203865	C1orf203	NR_027646	CCTAGCAAGCAACCAGGTGATGCTGATAAACTGCTGGTCAGGGACTCATG	chr1	116935486	116961244	-	N	N	N	N	II1	e0	-6.93	-6.16	0.77	-0.0780273	0.168249	0.0557837	0.644474	0.180022	0.799959	7.18257	7.10454	7.35082	7.23835
CD58	CD58 molecule	965	HGNC:1688|MIM:153420|Ensembl:ENSG00000116815|HPRD:01081|Vega:OTTHUMG00000022749	LFA-3|LFA3|ag3	NM_001779	GTGCTTGAGTCTCTTCCATCTCCCACACTAACTTGTGCATTGACTAATGG	chr1	117057155	117113715	-	N	N	N	N	II1	e0	-7.62	-7.07	0.55	0.032361	0.0717598	0.234582	0.92606	0.805844	0.241639	8.32515	8.35751	8.39691	8.55973
IGSF3	immunoglobulin superfamily, member 3	3321	HGNC:5950|MIM:603491|Ensembl:ENSG00000143061|HPRD:04602|Vega:OTTHUMG00000022751	EWI-3|V8	NM_001542	CAGATGGATGGTAATGGTGCCCTCCAGTGGCTGTGAGACCTCATTGCGCA	chr1	117117019	117209578	-	N	N	N	N	II1	e0	-4	-3.78	0.22	-0.41707	-0.159118	-0.265684	0.000237484	0.12069	0.00907379	7.83113	7.41406	7.67201	7.56545
MIR320B1	microRNA 320b-1	100302117	HGNC:35247|Ensembl:ENSG00000211543|miRBase:MI0003776	MIR320B-1|MIRN320B1|hsa-mir-320b-1	NR_031564	TAATCCCTCTCTTTCTAGTTCTTCCTAGAGTGAGGAAAAGCTGGGTTGAG	chr1	117214370	117214449	+	N	N	N	N	II1	e0	-6.38	-7.4	-1.02	-0.0427302	-0.0462337	0.00742971	0.812812	0.787375	0.977285	6.72056	6.67783	6.67432	6.72799
C1orf137	chromosome 1 open reading frame 137	388667	HGNC:32040|Ensembl:ENSG00000203864|HPRD:18385|Vega:OTTHUMG00000022754	-	NM_001013643	ATCCAAATGAGGCAACATCACCATCAGTCCTCCTTCCCTGGCTCACTGCC	chr1	117236733	117249225	+	N	N	N	N	II1	e0	-4.79	-2.84	1.95	-0.0249165	-0.00269874	-0.0167601	0.893257	0.988837	0.939669	6.82126	6.79635	6.81857	6.8045
CD2	CD2 molecule	914	HGNC:1639|MIM:186990|Ensembl:ENSG00000116824|HPRD:01750|Vega:OTTHUMG00000022750	LFA-2|SRBC|T11	NM_001767	GGCCACAGCCACCTCTGCATCTTCGAACTCAGCCATGTGGTCAACATCTG	chr1	117297085	117311851	+	N	N	N	N	II1	e2	-7.72	-7.41	0.31	0.224566	-0.391861	-0.635331	0.122234	0.00649986	0.000143286	10.955	11.1796	10.5631	10.3197
PTGFRN	prostaglandin F2 receptor inhibitor	5738	HGNC:9601|MIM:601204|Ensembl:ENSG00000134247|HPRD:03124|Vega:OTTHUMG00000012028	CD315|CD9P-1|EWI-F|FPRP|SMAP-6	NM_020440	CCAGACCTTCGTTTGTTTCCCCGGTGGCCCTTGCTTCTTGCTTTGCAGAC	chr1	117452688	117532972	+	N	N	N	N	II1	e0	-6.21	-4.24	1.97	0.0538958	-0.0119123	0.0624399	0.76362	0.959282	0.744345	6.6807	6.7346	6.66879	6.74314
CD101	CD101 molecule	9398	HGNC:5949|MIM:604516|Ensembl:ENSG00000134256|HPRD:05154|Vega:OTTHUMG00000012029	EWI-101|IGSF2|V7	NM_001256111	GGAGGGAAGACGAGGAGGAAGATGAAGGCAACTGAATCCCAAGAGGCACC	chr1	117544371	117579173	+	N	N	N	N	II1	e0	-4.07	-3.78	0.29	-0.0429194	-0.0650162	-0.0307315	0.793122	0.644813	0.882558	6.73992	6.697	6.6749	6.70919
TTF2	transcription termination factor, RNA polymerase II	8458	HGNC:12398|MIM:604718|Ensembl:ENSG00000116830|HPRD:05280|Vega:OTTHUMG00000012030	HuF2	NM_003594	CAGCCATCTCTGCAGTTCTCTCAGTGCAGGCAGTTCTTCCTCTCAGGCTG	chr1	117602948	117645491	+	N	N	N	N	II1	e1	-5.19	-6.8	-1.61	0.523139	0.0286152	0.187741	0.00344372	0.935757	0.395084	10.0837	10.6068	10.1123	10.2714
MIR942	microRNA 942	100126331	HGNC:33688|miRBase:MI0005767	MIRN942|hsa-mir-942	NR_030640	TATCTTCTCTGTTTTGGCCATGTGTGTACTCACAGCCCCTCACACATGGC	chr1	117637264	117637350	+	N	N	N	N	II1	e0	-8.6	-4.03	4.57	0.0188344	-0.123007	-0.0402268	0.930583	0.316997	0.852486	6.7898	6.80863	6.66679	6.74957
TRIM45	tripartite motif containing 45	80263	HGNC:19018|MIM:609318|Ensembl:ENSG00000134253|HPRD:15562|Vega:OTTHUMG00000012119	RNF99	NM_001145635	TGTCCCCCTACTCCGTCTCTATGCCATGACAGCCTTCTGCCCCAAAGCCT	chr1	117653676	117664411	-	N	N	N	N	II1	e0	-6.46	-6.64	-0.18	-0.178604	-0.0418605	-0.112267	0.0584649	0.786498	0.327415	7.19522	7.01662	7.15336	7.08295
VTCN1	V-set domain containing T cell activation inhibitor 1	79679	HGNC:28873|MIM:608162|Ensembl:ENSG00000134258|HPRD:06429|Vega:OTTHUMG00000012118	B7-H4|B7H4|B7S1|B7X|B7h.5|PRO1291|VCTN1	NR_045604	CCCACACTCTTCATGTGTTAACCACTGCCTTCCTGGACCTTGGAGCCACG	chr1	117686208	117753582	-	N	N	N	N	II1	e0	-1.51	-1.82	-0.31	0.0866447	0.110292	0.0370994	0.535899	0.38989	0.867284	6.56319	6.64983	6.67348	6.60029
MAN1A2	mannosidase, alpha, class 1A, member 2	10905	HGNC:6822|MIM:604345|HPRD:05067	MAN1B	NM_006699	CAGGAACTTCTCAAGGGATGAGGAGACAGAACCCCTACTTCCAAGTGCTC	chr1	117910084	118068320	+	N	N	N	N	II1	e0	-2.91	-2.28	0.63	0.314607	0.26465	0.19996	0.00928069	0.0283224	0.119579	7.17986	7.49446	7.44451	7.37982
FAM46C	family with sequence similarity 46, member C	54855	HGNC:24712|MIM:613952|Ensembl:ENSG00000183508|HPRD:13312|Vega:OTTHUMG00000013703	-	NM_017709	GTGCCTAGGAGGTCTGGGGATTCCTCTTTCGTGGTGGTCACTAACCTTAC	chr1	118148603	118171011	+	N	N	N	N	II1	e2	-9.02	-7.08	1.94	-0.291582	-0.938472	-0.924019	0.147088	6.61553e-05	8.09282e-05	9.75225	9.46067	8.81378	8.82823
GDAP2	ganglioside induced differentiation associated protein 2	54834	HGNC:18010|Ensembl:ENSG00000196505|HPRD:06576|Vega:OTTHUMG00000012199	MACROD3|dJ776P7.1	NM_017686	CAGCATCTCTTGAGTTGCCTGCATCAGTGTGGAGGAAGTGTGTCACAGTG	chr1	118406106	118472302	-	N	N	N	N	II1	e0	-2.43	-4.41	-1.98	0.14954	0.236991	0.192144	0.113515	0.0108881	0.0411359	7.18887	7.33841	7.42586	7.38101
WDR3	WD repeat domain 3	10885	HGNC:12755|MIM:604737|Ensembl:ENSG00000065183|HPRD:16066|Vega:OTTHUMG00000012197	DIP2|UTP12	NM_006784	GGGCACTGACCCACCCCTACGCCCCGCACAGTCAAAAATCTGCATATAAC	chr1	118472371	118503049	+	N	N	N	N	II1	e0	-3.19	-4.65	-1.46	0.111813	0.0705758	0.00992274	0.47497	0.709296	0.973696	6.90577	7.01758	6.97635	6.91569
SPAG17	sperm associated antigen 17	200162	HGNC:26620|Ensembl:ENSG00000155761|HPRD:10146|Vega:OTTHUMG00000012198	PF6|RP4-776P7.2	NM_206996	CTAGACACTCTGAATAGGGCAGGTCCCAGGAACACCTGAAAGGAGCACAT	chr1	118496287	118727848	-	Y	Y	N	N	PP1	e0	3.02	1.56	-1.46	-0.0744015	0.0199916	0.00951486	0.620482	0.925839	0.971239	6.80869	6.73429	6.82869	6.81821
TBX15	T-box 15	6913	HGNC:11594|MIM:604127|Ensembl:ENSG00000092607|HPRD:16035|Vega:OTTHUMG00000012263	TBX14	NM_152380	AATGCCTGCCCGCTATCCCTGTGGCAGGAAATATCCCCTCATGTCCCAGG	chr1	119425665	119532179	-	Y	Y	Y	N	PI1	e0	1.05	0.83	-0.22	-0.0228618	-0.00845376	0.036533	0.920028	0.97115	0.879702	6.65654	6.63367	6.64808	6.69307
WARS2	tryptophanyl tRNA synthetase 2, mitochondrial	10352	HGNC:12730|MIM:604733|Ensembl:ENSG00000116874|HPRD:05295|Vega:OTTHUMG00000012335	TrpRS	NM_015836	CCTTGTGTCAGAACACATGTTAATCCACAAAACGCCCCATCCCAGATTCC	chr1	119573838	119683295	-	Y	Y	Y	Y	AMB1	e0	-0.41	-1.94	-1.53	0.134824	-0.189759	-0.213043	0.210446	0.0600331	0.0365911	7.27012	7.40494	7.08036	7.05708
HAO2	hydroxyacid oxidase 2 (long chain)	51179	HGNC:4810|MIM:605176|Ensembl:ENSG00000116882|HPRD:05532|Vega:OTTHUMG00000012410	GIG16|HAOX2	NM_016527	TCTAATACCACCACCCCTGTGCTTCAGGCCCTCCAAACCCCTGTGTTCCC	chr1	119911401	119936751	+	N	N	N	N	II1	e0	-2.07	-2.35	-0.28	-0.11193	0.0911641	-0.0560026	0.326322	0.467149	0.744901	6.83167	6.71974	6.92284	6.77567
HSD3B2	hydroxy-delta-5-steroid dehydrogenase, 3 beta- and steroid delta-isomerase 2	3284	HGNC:5218|MIM:613890|Ensembl:ENSG00000203859|HPRD:01941|Vega:OTTHUMG00000012526	HSD3B|HSDB|SDR11E2	NM_001166120	AATGTCATCAAACTCCACCCACCTGGCTTCATACAGAAGGCAACAGGGGC	chr1	119957553	119965662	+	N	N	N	N	II1	e0	-2.98	-3.94	-0.96	-0.0432332	-0.0270127	-0.0179569	0.825155	0.898291	0.945387	6.7416	6.69837	6.71459	6.72364
HSD3B1	hydroxy-delta-5-steroid dehydrogenase, 3 beta- and steroid delta-isomerase 1	3283	HGNC:5217|MIM:109715|Ensembl:ENSG00000203857|HPRD:04920|Vega:OTTHUMG00000012525	3BETAHSD|HSD3B|HSDB3|HSDB3A|I|SDR11E1	NM_000862	GTATTCCTCATGTCATCAAAACCTGCGCAGTCATTGGCCCAACAAGAAGG	chr1	120049825	120057681	+	N	N	N	N	II1	e0	-1.48	-4.14	-2.66	-0.072824	-0.0151684	-0.0824088	0.569039	0.938419	0.539066	6.78782	6.715	6.77265	6.70541
HSD3BP4	hydroxy-delta-5-steroid dehydrogenase, 3 beta, pseudogene 4	128102	HGNC:5222	-	NR_033781	GTCAAGCTCCATCCTCCTGGCTTCATACAGGTGACAAGGGCAAAAGTCCA	chr1	120106502	120115199	+	N	N	N	N	II1	e0	-4.79	-0.29	4.5	-0.0592831	-0.0649345	-0.16809	0.762394	0.731424	0.220645	6.86895	6.80967	6.80402	6.70086
LINC00622	long intergenic non-protein coding RNA 622	644242	HGNC:44251|Ensembl:ENSG00000260941	-	NR_036540	GCATCACACACCTTTGCCTGCTATAGCACATGCTAGAGTGCACCTTACAG	chr1	120140324	120141914	-	N	N	N	N	II1	e0	-6.21	-6	0.21	-0.0551513	-0.0504524	-0.101019	0.706652	0.739256	0.416946	6.7819	6.72674	6.73144	6.68088
ZNF697	zinc finger protein 697	90874	HGNC:32034|Ensembl:ENSG00000143067|Vega:OTTHUMG00000012962	-	NM_001080470	GATGAAGAGCAGTCTTCCTCTGCTGCCCTTTACTAAGCAAAACCTGGAGC	chr1	120161999	120190390	-	N	N	N	N	II1	e0	-5.41	-5.06	0.35	0.0863625	0.0194338	0.0995815	0.606959	0.938323	0.568908	6.74944	6.8358	6.76887	6.84902
PHGDH	phosphoglycerate dehydrogenase	26227	HGNC:8923|MIM:606879|Ensembl:ENSG00000092621|HPRD:06047|Vega:OTTHUMG00000012100	3-PGDH|3PGDH|PDG|PGAD|PGD|PGDH|SERA	NM_006623	CCACATTCTTGGGCTGAACGCGGGCCTCTGACACTGCTTACACTGCACTC	chr1	120254418	120286849	+	N	N	N	N	II1	e2	-7.52	-6.55	0.97	-0.55807	-0.897283	-0.961103	0.00768266	0.000189198	0.000110169	12.7459	12.1878	11.8486	11.7848
HMGCS2	3-hydroxy-3-methylglutaryl-CoA synthase 2 (mitochondrial)	3158	HGNC:5008|MIM:600234|Ensembl:ENSG00000134240|HPRD:02580|Vega:OTTHUMG00000012101	-	NM_001166107	GGCCCTTCATTCCTCTCCATGCTGCAATCACTGTCCTGGGCTTATGGTGC	chr1	120290618	120311555	-	N	N	N	N	II1	e0	-1.64	-1.37	0.27	0.0183473	0.0305537	-0.0297157	0.920454	0.850671	0.878705	6.74675	6.7651	6.7773	6.71703
REG4	regenerating islet-derived family, member 4	83998	HGNC:22977|MIM:609846|Ensembl:ENSG00000134193|HPRD:17964|Vega:OTTHUMG00000012175	GISP|REG-IV|RELP	NM_001159353	GGTCTGGCAAGTCCATGGGTGGGAACAAGCACTGTGCTGAGATGAGCTCC	chr1	120344945	120354203	-	N	N	N	N	II1	e0	-3.45	-1.81	1.64	0.0304178	0.0152261	0.0902223	0.897846	0.951746	0.61733	6.6149	6.64531	6.63012	6.70512
NBPF7	neuroblastoma breakpoint family, member 7	343505	HGNC:31989|MIM:613997	-	NM_001047980	CTGCAGGACTCCCCGGAGGAAAGGGTTACGACTTCTTGTAGTGACCATGA	chr1	120377387	120387503	-	N	N	N	N	II1	e0	-4.94	-4.7	0.24	0.0828076	0.0416026	0.022184	0.668875	0.861265	0.943477	6.79696	6.87977	6.83856	6.81914
ADAM30	ADAM metallopeptidase domain 30	11085	HGNC:208|MIM:604779|Ensembl:ENSG00000134249|HPRD:05307|Vega:OTTHUMG00000012176	svph4	NM_021794	ACCAGTGCATTCTACTTCTCGAGTGTTCACTTGCCCCTCAGTTTGTGACC	chr1	120436155	120439147	-	N	N	N	N	II1	e0	-6.45	-2.47	3.98	0.144074	0.0862086	0.0553163	0.246415	0.578836	0.792044	6.67813	6.82221	6.76434	6.73345
NOTCH2	notch 2	4853	HGNC:7882|MIM:600275|Ensembl:ENSG00000134250|HPRD:02606|Vega:OTTHUMG00000012177	AGS2|HJCYS|hN2	NM_024408	AGCCATAGCTGGTGACAAACAGATGGTTGCTCAGGGACAAGGTGCCTTCC	chr1	120454175	120612317	-	N	N	N	N	II1	e0	-4.26	-4.07	0.19	0.121348	-0.158227	0.0136338	0.34912	0.183725	0.95934	7.06857	7.18992	6.91034	7.0822
FAM72B	family with sequence similarity 72, member B	653820	HGNC:24805|MIM:614711|Ensembl:ENSG00000188610|Vega:OTTHUMG00000040902	p17	NM_001100910	TAGGACTTAGAAAAGCTCTAGGTCCCGCAACTTGAATTTTAGCCTAGGGG	chr1	120839004	120855681	+	N	N	N	N	II1	e0	-6.34	-7.12	-0.78	-0.262152	-0.397959	-0.216483	0.0141833	0.000702248	0.0486297	8.32027	8.05812	7.92231	8.10379
FCGR1B	Fc fragment of IgG, high affinity Ib, receptor (CD64)	2210	HGNC:3614|MIM:601502|HPRD:14225	CD64b|IGFRB	NR_045213	GCAGCCTCCATGGGTCAGCGTGTTCCAAGAGGAAACCGTAACCTTGCACT	chr1	120926127	120935944	-	N	N	N	N	II1	e0	-8.81	-5.63	3.18	0.0264632	0.00364065	0.0237359	0.912573	0.98821	0.931054	6.70667	6.73313	6.71031	6.7304
EMBP1	embigin pseudogene 1	647121	HGNC:38661	-	NR_003955	GAGTCTCTGGGCCAGTGAATACAAAACATCATGTCGAGAATCATTGGAAG	chr1	121260909	121313686	+	N	N	N	N	II1	e0	-3.94	-3.54	0.4	-0.0825163	-0.121276	-0.114672	0.608098	0.380232	0.45632	6.94746	6.86494	6.82618	6.83279
RP6-206I17.2	phosphodiesterase 4D interacting protein pseudogene	100130000	-	-	NR_033189	GATACATGATCCCTTAATTCAGGCTCAGGCTGAAGAACTGACCCACTTAC	chr1	143687129	143714180	+	N	N	N	N	II1	e0	-4.56	-5.96	-1.4	-0.0220299	0.082429	0.0609649	0.910991	0.526484	0.709365	6.75915	6.73712	6.84158	6.82012
LINC01138	uncharacterized FLJ39739	388685	HPRD:13438	-	NR_104014	GGGCTCTTCAAAGGCCTAAAAGCTAAAGGCGAGGATGGATTAATTCAACA	chr1	143717587	143744457	-	N	N	N	N	II1	e0	-6.12	-6.42	-0.3	-0.0078356	-0.140498	-0.0955024	0.970227	0.153476	0.435511	6.80896	6.80113	6.66846	6.71346
PPIAL4G	peptidylprolyl isomerase A (cyclophilin A)-like 4G	644591	HGNC:33996|Ensembl:ENSG00000236334|Vega:OTTHUMG00000013629	BX284650.5|COAS-2	NM_001123068	GCCGCCATCGCTGTGAGCCCTGTACTATCAGCCATGGTCAACTCCGTCAT	chr1	143767143	143767881	-	N	N	N	N	II1	e0	-5.36	-3.71	1.65	0.00992766	-0.0360973	-0.0424035	0.954214	0.790984	0.778187	6.70908	6.71901	6.67298	6.66668
FAM72D	family with sequence similarity 72, member D	728833	HGNC:33593|MIM:614712|Ensembl:ENSG00000215784|Vega:OTTHUMG00000074801	GCUD2	NM_207418	GCATTCAGAGCTACAAAGGAATAGGAAAGTAGGGTAGTGTTGGATTCTGG	chr1	143896451	143913143	-	N	N	N	N	II1	e2	-5.74	-5.66	0.08	-0.261646	-0.515288	-0.319533	0.12713	0.00291045	0.0621685	8.48883	8.22718	7.97354	8.1693
LINC00623	long intergenic non-protein coding RNA 623	728855	HGNC:44252|Ensembl:ENSG00000235398	-	NR_109754	CCTGAAGGGCTCGTGCAGACGTACAGGCGGGATCTTCTGGAAGTGAGAAT	chr1	144300511	144340773	-	N	N	N	N	II1	e0	-6.01	-5.74	0.27	-0.0818006	-0.0618942	-0.0155322	0.69094	0.784076	0.962848	7.79422	7.71242	7.73232	7.77868
RP11-640M9.1	uncharacterized LOC728875	728875	Ensembl:ENSG00000236943	-	NR_024584	ACACCTAGGAAGGGAGAACTGGACTTATTTAATGGGGATGTGTTCAAGGC	chr1	144480745	144521969	-	N	N	N	N	II1	e0	-4.48	-5.43	-0.95	0.0168638	-0.0178414	0.0421157	0.9303	0.925209	0.817725	6.83234	6.8492	6.81449	6.87445
PPIAL4B	peptidylprolyl isomerase A (cyclophilin A)-like 4B	653505	HGNC:33994|Ensembl:ENSG00000255854|Vega:OTTHUMG00000013667	COAS-2	NM_001143883	CGTCGACGGCAAGCCCTTGGGCCGCATCTCCATCAAACTGTTTGCAGACA	chr1	144363461	144364246	-	N	N	N	N	II1	e0	0	-3.11	-3.11	-0.139069	-0.115128	-0.0344875	0.483079	0.598524	0.921285	11.794	11.6549	11.6789	11.7595
PPIAL4C	peptidylprolyl isomerase A (cyclophilin A)-like 4C	653598	HGNC:33995|Ensembl:ENSG00000198161|Vega:OTTHUMG00000013954	COAS-2	NM_001135789	AGGGGTATTAATAATTTAAAGAGTTTAATTACTTTTTACTACTAGAAAAC	chr1	144363461	144364246	-	N	N	N	N	II1	e0	0	-3.11	-3.11	0.0422208	0.0533155	0.0508703	0.878117	0.831568	0.866325	6.86062	6.90284	6.91394	6.91149
PPIAL4A	peptidylprolyl isomerase A (cyclophilin A)-like 4A	164022	HGNC:24369|Ensembl:ENSG00000255963|HPRD:09781|Vega:OTTHUMG00000013920	COAS-2|COAS2|PPIAL4	NM_178230	TGTGTCAGGGTGGTGACTTCACACGCCATAATGGCACTGGTGACAAGTCC	chr1	144363586	144364246	-	N	N	N	N	II1	e0	0	-3.11	-3.11	-0.184645	-0.230755	-0.148431	0.127612	0.0506052	0.284623	13.9558	13.7711	13.725	13.8073
PFN1P2	profilin 1 pseudogene 2	767846	HGNC:24298|MIM:608609	C1orf152|COAS3	NR_003242	GTGGACACCTCCATCTACAGCCTCGTGGCGGACGGGACCTGTTAGGACAC	chr1	144610814	144612727	-	N	N	N	N	II1	e0	-4.71	-5.59	-0.88	0.088595	0.117509	0.0925134	0.539974	0.366587	0.556823	6.79847	6.88707	6.91598	6.89098
NBPF9	neuroblastoma breakpoint family, member 9	400818	HGNC:31991|MIM:613999|Ensembl:ENSG00000168614|Vega:OTTHUMG00000013845	AE01	NM_001277444	CCTTCCAGTTGTCTTGAACAGCCTGACTCCTGGCAGCCCTATGGAAGTTC	chr1	148250248	148346929	-	N	N	N	N	II1	e1	-1.16	-3.59	-2.43	0.926988	0.564518	0.896472	0.000228444	0.0106961	0.00033682	8.94954	9.87653	9.51406	9.84602
NBPF8	neuroblastoma breakpoint family, member 8	728841	HGNC:31990|MIM:613998	NBPF8P	NM_001037501	TCCTTTTATGCATTGGAGGAAAAACATGTTGGCTTTTCTCTCGACGTGGG	chr1	144614958	144830407	+	N	N	N	N	II1	e0	-3.91	-4.24	-0.33	0.483294	0.250094	0.458483	0.00742324	0.192211	0.0121431	7.57748	8.06078	7.82758	8.03597
[truncated: 20,261 more rows]
